# Supplementary material for: Getting the SMILES right: identifying inconsistent chemical identities in the ECHA database, PubChem and the CompTox Chemicals Dashboard
Source: Royal Society of Chemistry journal article supplement (doi:10.1039/d2va00225f), 2023-01-01
Supplement: d2va00225f1.xlsx [file d2va00225f1.xlsx]

## Sheet: General Information
This Supporting Information belongs to the publication Glüge et al. (2023) with the title 'Getting the SMILES right: Identifying inconsistent chemical identities in the ECHA database, PubChem and the CompTox Chemicals Dashboard '
The color code in the two tables corresponds to:
	inconsistent information on the molecular structure where the assignment could be checked with SciFindern
	inconsistent information on the molecular structure in at least two databases and no verification possible via SciFindern
	missing cis/trans tautomer information for alkenes
	‘Omitted undefined stereo’ warning in Open Babel
	tautomeres. Tautomers with identical InChI string were color-coded whenever they were detected in the manual data curation
	this CAS number was not included in the ECHA database; it was obtained from one of the other databases based on the InChIKey (or sometimes name)
	the information in the ECHA database was updated betweeen December 2020 and June 2021
Comments to Group 1
inconsistent structure			Inconsistency related to the molecular structure itself
deviating stereochemistry			Inconsistencies related to the stereochemistry (deviating stereochemistry)
missing stereochemistry			Inconsistencies related to the stereochemistry (no stereochemistry information in the ECHA database while SciFindern has some)
SciFinder has no stereochemistry			Inconsistencies related to the stereochemistry (available stereochemistry information in the ECHA database were SciFindern has none)
deviating cis/trans isomers			Inconsistency related to cis/trans isomers
unusual valence			Unusual valence
polymer			Monomer shown for a polymer

## Sheet: Organic_OneComponent
Factsheet_ID	Substance_ID	Substance_Name	Name_To_Structure SMILES	Name_To_Structure InChI	Name identical to CAS RN?	Name identical to SMILES in ECHA DB?	Comment for name	EC_No	CAS_RN	Entry in ECHA DB consistent?	Substance Type manually	Composition manually	Registration_Type	Tonnage_Band_Displayed	SMILES corresponding to CAS RN	InChI corresponding to CAS RN	SMILES ECHA database	SMILES ECHA database from WebPage	Old entry from ECHA database correct?	DTXCID	SMILES CompTox	SMILES identical	SMILES PubChem	SMILES identical2	Comment	INCHI ECHA database	INCHI CompTox	INCHI Pubchem	INCHI identical 1	INCHI identical 2	SMILES SciFinder	INCHI SciFinder	INCHI identical 3
4419	100.103.411	Retinoxytrimethylsilane	-					435-930-1	16729-19-4	no	organic	mono-constituent substance	NONS	Tonnage data confidential	C\C(=C\CO[Si](C)(C)C)\C=C/C=C(\C)/C=C/C1=C(C)CCCC1(C)C		C\C(=C/CO[Si](C)(C)C)\C=C\C=C(/C)\C=C\C1=C(C)CCCC1(C)C	C\C(=C/CO[Si](C)(C)C)\C=C\C=C(/C)\C=C\C1=C(C)CCCC1(C)C	TRUE		C\C(=C\CO[Si](C)(C)C)\C=C/C=C(\C)/C=C/C1=C(C)CCCC1(C)C	FALSE	CC1=C(C(CCC1)(C)C)/C=C/C(=C/C=C/C(=C/CO[Si](C)(C)C)/C)/C	FALSE	deviating cis/trans isomer	InChI=1S/C23H38OSi/c1-19(11-9-12-20(2)16-18-24-25(6,7)8)14-15-22-21(3)13-10-17-23(22,4)5/h9,11-12,14-16H,10,13,17-18H2,1-8H3/b12-9+,15-14+,19-11+,20-16+	InChI=1S/C23H38OSi/c1-19(11-9-12-20(2)16-18-24-25(6,7)8)14-15-22-21(3)13-10-17-23(22,4)5/h9,11-12,14-16H,10,13,17-18H2,1-8H3/b12-9-,15-14+,19-11+,20-16-	InChI=1S/C23H38OSi/c1-19(11-9-12-20(2)16-18-24-25(6,7)8)14-15-22-21(3)13-10-17-23(22,4)5/h9,11-12,14-16H,10,13,17-18H2,1-8H3/b12-9+,15-14+,19-11+,20-16+	FALSE	TRUE
19000	100.006.972	3-methyl-2-pent-2-enylcyclopent-2-enone	CCC=CCC1=C(C)CCC1=O	InChI=1S/C11H16O/c1-3-4-5-6-10-9(2)7-8-11(10)12/h4-5H,3,6-8H2,1-2H3	FALSE	FALSE	missing cis/trans isomers	207-668-4	488-10-8	no	organic	mono-constituent substance	FULL	≥ 10 to < 100 tonnes	CC\C=C/CC1=C(C)CCC1=O	InChI=1S/C11H16O/c1-3-4-5-6-10-9(2)7-8-11(10)12/h4-5H,3,6-8H2,1-2H3/b5-4-	CC\C=C\CC1=C(C)CCC1=O	CC\C=C\CC1=C(C)CCC1=O	TRUE	DTXCID2027092	CC\C=C/CC1=C(C)CCC1=O	FALSE	CC/C=C\CC1=C(CCC1=O)C	FALSE	deviating cis/trans isomer	InChI=1S/C11H16O/c1-3-4-5-6-10-9(2)7-8-11(10)12/h4-5H,3,6-8H2,1-2H3/b5-4+	InChI=1S/C11H16O/c1-3-4-5-6-10-9(2)7-8-11(10)12/h4-5H,3,6-8H2,1-2H3/b5-4-	InChI=1S/C11H16O/c1-3-4-5-6-10-9(2)7-8-11(10)12/h4-5H,3,6-8H2,1-2H3/b5-4-	FALSE	FALSE
28352	100.003.973	Benzyl 2-methoxy-4-prop-1-enylphenyl ether	COC1=C(OCC2=CC=CC=C2)C=CC(C=CC)=C1	InChI=1S/C17H18O2/c1-3-7-14-10-11-16(17(12-14)18-2)19-13-15-8-5-4-6-9-15/h3-12H,13H2,1-2H3	FALSE	FALSE	missing cis/trans isomers	204-370-6	120-11-6	no	organic	mono-constituent substance	FULL	≥ 0 to < 10 tonnes	C/C=C/C1=CC(=C(C=C1)OCC2=CC=CC=C2)OC	InChI=1S/C17H18O2/c1-3-7-14-10-11-16(17(12-14)18-2)19-13-15-8-5-4-6-9-15/h3-12H,13H2,1-2H3/b7-3+	COC1=CC(\C=C/C)=CC=C1OCC1=CC=CC=C1	COC1=CC(\C=C/C)=CC=C1OCC1=CC=CC=C1	TRUE	DTXCID1030157	COC1=CC(\C=C/C)=CC=C1OCC1=CC=CC=C1	FALSE	C/C=C/C1=CC(=C(C=C1)OCC2=CC=CC=C2)OC	OK	deviating cis/trans isomer	InChI=1S/C17H18O2/c1-3-7-14-10-11-16(17(12-14)18-2)19-13-15-8-5-4-6-9-15/h3-12H,13H2,1-2H3/b7-3-	InChI=1S/C17H18O2/c1-3-7-14-10-11-16(17(12-14)18-2)19-13-15-8-5-4-6-9-15/h3-12H,13H2,1-2H3/b7-3-	InChI=1S/C17H18O2/c1-3-7-14-10-11-16(17(12-14)18-2)19-13-15-8-5-4-6-9-15/h3-12H,13H2,1-2H3/b7-3+	TRUE	FALSE
16062	100.017.422	6-chloro-2-(6-chloro-4-methyl-3-oxobenzo[b]thien-2(3H)-ylidene)-4-methylbenzo[b]thiophene-3(2H)-one	CC1=C2C(=O)C(SC2=CC(Cl)=C1)=C1SC2=CC(Cl)=CC(C)=C2C1=O	InChI=1S/C18H10Cl2O2S2/c1-7-3-9(19)5-11-13(7)15(21)17(23-11)18-16(22)14-8(2)4-10(20)6-12(14)24-18/h3-6H,1-2H3	FALSE	FALSE	missing cis/trans isomers	219-163-6	2379-74-0	no	organic	mono-constituent substance	FULL	≥ 10 to < 100 tonnes	CC1=CC(Cl)=CC2=C1C(=O)\C(S2)=C1\SC2=C(C1=O)C(C)=CC(Cl)=C2	InChI=1S/C18H10Cl2O2S2/c1-7-3-9(19)5-11-13(7)15(21)17(23-11)18-16(22)14-8(2)4-10(20)6-12(14)24-18/h3-6H,1-2H3/b18-17-	CC1=CC(Cl)=CC2=C1C(=O)\C(S2)=C1/SC2=C(C1=O)C(C)=CC(Cl)=C2	CC1=CC(Cl)=CC2=C1C(=O)\C(S2)=C1/SC2=C(C1=O)C(C)=CC(Cl)=C2	TRUE	DTXCID7032426	CC1=CC(Cl)=CC2=C1C(=O)\C(S2)=C1\SC2=C(C1=O)C(C)=CC(Cl)=C2	FALSE	CC1=CC(=CC2=C1C(=O)/C(=C\3/C(=O)C4=C(S3)C=C(C=C4C)Cl)/S2)Cl	FALSE	deviating cis/trans isomer	InChI=1S/C18H10Cl2O2S2/c1-7-3-9(19)5-11-13(7)15(21)17(23-11)18-16(22)14-8(2)4-10(20)6-12(14)24-18/h3-6H,1-2H3/b18-17+	InChI=1S/C18H10Cl2O2S2/c1-7-3-9(19)5-11-13(7)15(21)17(23-11)18-16(22)14-8(2)4-10(20)6-12(14)24-18/h3-6H,1-2H3/b18-17-	InChI=1S/C18H10Cl2O2S2/c1-7-3-9(19)5-11-13(7)15(21)17(23-11)18-16(22)14-8(2)4-10(20)6-12(14)24-18/h3-6H,1-2H3/b18-17+	FALSE	TRUE
13064	100.101.217	Methyl-3-methoxyacrylate	COC=CC(=O)OC	InChI=1S/C5H8O3/c1-7-4-3-5(6)8-2/h3-4H,1-2H3	FALSE	FALSE	missing cis/trans isomers	412-900-4	5788-17-0	no	organic	mono-constituent substance	NONS	Tonnage data confidential	CO\C=C\C(=O)OC	InChI=1S/C5H8O3/c1-7-4-3-5(6)8-2/h3-4H,1-2H3/b4-3+	CO\C=C/C(=O)OC	CO\C=C/C(=O)OC	TRUE	DTXCID50909332	CO\C=C\C(=O)OC	FALSE	CO/C=C/C(=O)OC	OK	deviating cis/trans isomer	InChI=1S/C5H8O3/c1-7-4-3-5(6)8-2/h3-4H,1-2H3/b4-3-	InChI=1S/C5H8O3/c1-7-4-3-5(6)8-2/h3-4H,1-2H3/b4-3+	InChI=1S/C5H8O3/c1-7-4-3-5(6)8-2/h3-4H,1-2H3/b4-3+	FALSE	FALSE
20872	100.001.588	Caryophyllene	C\C1=C/CCC(=C)[C@H]2CC(C)(C)[C@@H]2CC1	InChI=1S/C15H24/c1-11-6-5-7-12(2)13-10-15(3,4)14(13)9-8-11/h6,13-14H,2,5,7-10H2,1,3-4H3/b11-6+/t13-,14-/m1/s1	FALSE	TRUE		201-746-1	87-44-5	no	organic	mono-constituent substance	FULL	≥ 100 to < 1000 tonnes	CC1(C)[C@]2([C@](C1)(C(=C)CC\C=C(\C)/CC2)[H])[H]	InChI=1S/C15H24/c1-11-6-5-7-12(2)13-10-15(3,4)14(13)9-8-11/h6,13-14H,2,5,7-10H2,1,3-4H3/b11-6-/t13-,14-/m1/s1	[H][C@]12CC(C)(C)[C@]1([H])CC\C(C)=C\CCC2=C	[H][C@]12CC(C)(C)[C@]1([H])CC\C(C)=C\CCC2=C	TRUE	DTXCID304739	[H][C@]12CC(C)(C)[C@]1([H])CC\C(C)=C\CCC2=C	TRUE	C/C/1=C\CCC(=C)[C@H]2CC([C@@H]2CC1)(C)C	OK	deviating cis/trans isomer	InChI=1S/C15H24/c1-11-6-5-7-12(2)13-10-15(3,4)14(13)9-8-11/h6,13-14H,2,5,7-10H2,1,3-4H3/b11-6+/t13-,14-/m1/s1	InChI=1S/C15H24/c1-11-6-5-7-12(2)13-10-15(3,4)14(13)9-8-11/h6,13-14H,2,5,7-10H2,1,3-4H3/b11-6+/t13-,14-/m1/s1	InChI=1S/C15H24/c1-11-6-5-7-12(2)13-10-15(3,4)14(13)9-8-11/h6,13-14H,2,5,7-10H2,1,3-4H3/b11-6+/t13-,14-/m1/s1		TRUE	CC1(C)[C@]2([C@](C1)(C(=C)CC\C=C(\C)/CC2)[H])[H]	InChI=1S/C15H24/c1-11-6-5-7-12(2)13-10-15(3,4)14(13)9-8-11/h6,13-14H,2,5,7-10H2,1,3-4H3/b11-6-/t13-,14-/m1/s1	FALSE
10345	100.003.072	Nerol	CC(C)=CCC\C(C)=C/CO	InChI=1S/C10H18O/c1-9(2)5-4-6-10(3)7-8-11/h5,7,11H,4,6,8H2,1-3H3/b10-7-	TRUE			203-378-7	106-25-2	no	organic	mono-constituent substance	FULL	≥ 100 to < 1000 tonnes	CC(C)=CCC\C(C)=C/CO	InChI=1S/C10H18O/c1-9(2)5-4-6-10(3)7-8-11/h5,7,11H,4,6,8H2,1-3H3/b10-7-	CC(C)=CCC\C(C)=C\CO	CC(C)=CCC\C(C)=C\CO	TRUE	DTXCID806728	CC(C)=CCC\C(C)=C/CO	FALSE	CC(=CCC/C(=C\CO)/C)C	FALSE	deviating cis/trans isomer	InChI=1S/C10H18O/c1-9(2)5-4-6-10(3)7-8-11/h5,7,11H,4,6,8H2,1-3H3/b10-7+	InChI=1S/C10H18O/c1-9(2)5-4-6-10(3)7-8-11/h5,7,11H,4,6,8H2,1-3H3/b10-7-	InChI=1S/C10H18O/c1-9(2)5-4-6-10(3)7-8-11/h5,7,11H,4,6,8H2,1-3H3/b10-7-	FALSE	FALSE
21334	100.004.964	Neryl acetate	CC(C)=CCC\C(C)=C/COC(C)=O	InChI=1S/C12H20O2/c1-10(2)6-5-7-11(3)8-9-14-12(4)13/h6,8H,5,7,9H2,1-4H3/b11-8-	TRUE			205-459-2	141-12-8	no	organic	mono-constituent substance	FULL	≥ 100 to < 1000 tonnes	CC(C)=CCC\C(C)=C/COC(C)=O	InChI=1S/C12H20O2/c1-10(2)6-5-7-11(3)8-9-14-12(4)13/h6,8H,5,7,9H2,1-4H3/b11-8-	CC(C)=CCC\C(C)=C\COC(C)=O	CC(C)=CCC\C(C)=C\COC(C)=O	TRUE	DTXCID0027068	CC(C)=CCC\C(C)=C/COC(C)=O	FALSE	CC(=CCC/C(=C\COC(=O)C)/C)C	FALSE	deviating cis/trans isomer	InChI=1S/C12H20O2/c1-10(2)6-5-7-11(3)8-9-14-12(4)13/h6,8H,5,7,9H2,1-4H3/b11-8+	InChI=1S/C12H20O2/c1-10(2)6-5-7-11(3)8-9-14-12(4)13/h6,8H,5,7,9H2,1-4H3/b11-8-	InChI=1S/C12H20O2/c1-10(2)6-5-7-11(3)8-9-14-12(4)13/h6,8H,5,7,9H2,1-4H3/b11-8-	FALSE	FALSE
1703	100.149.350	(4Z)-hept-4-en-2-yl salicylate	CC\C=C/CC(C)OC(=O)C1=CC=CC=C1O	InChI=1S/C14H18O3/c1-3-4-5-8-11(2)17-14(16)12-9-6-7-10-13(12)15/h4-7,9-11,15H,3,8H2,1-2H3/b5-4-	TRUE			700-488-1	873888-84-7	no	organic	mono-constituent substance	FULL	≥ 1 to < 10 tonnes	CC\C=C/CC(C)OC(=O)C1=C(O)C=CC=C1	InChI=1S/C14H18O3/c1-3-4-5-8-11(2)17-14(16)12-9-6-7-10-13(12)15/h4-7,9-11,15H,3,8H2,1-2H3/b5-4-	CC\C=C\CC(C)OC(=O)C1=C(O)C=CC=C1	CC\C=C\CC(C)OC(=O)C1=C(O)C=CC=C1	TRUE	DTXCID80998597	CC\C=C/CC(C)OC(=O)C1=C(O)C=CC=C1	FALSE	CC/C=C\CC(C)OC(=O)C1=CC=CC=C1O	OK	deviating cis/trans isomer	InChI=1S/C14H18O3/c1-3-4-5-8-11(2)17-14(16)12-9-6-7-10-13(12)15/h4-7,9-11,15H,3,8H2,1-2H3/b5-4+	InChI=1S/C14H18O3/c1-3-4-5-8-11(2)17-14(16)12-9-6-7-10-13(12)15/h4-7,9-11,15H,3,8H2,1-2H3/b5-4-	InChI=1S/C14H18O3/c1-3-4-5-8-11(2)17-14(16)12-9-6-7-10-13(12)15/h4-7,9-11,15H,3,8H2,1-2H3/b5-4-	FALSE	FALSE
3295	100.101.051	(E)-3-(2-chlorophenyl)-2-(4-fluorophenyl)propenal	FC1=CC=C(C=C1)C(\C=O)=C/C1=C(Cl)C=CC=C1	InChI=1S/C15H10ClFO/c16-15-4-2-1-3-12(15)9-13(10-18)11-5-7-14(17)8-6-11/h1-10H/b13-9-	TRUE			410-980-5	112704-51-5	no	organic	mono-constituent substance	NONS	Cease manufacture	C(=C/C1=C(Cl)C=CC=C1)(\C=O)/C2=CC=C(F)C=C2	InChI=1S/C15H10ClFO/c16-15-4-2-1-3-12(15)9-13(10-18)11-5-7-14(17)8-6-11/h1-10H/b13-9-	FC1=CC=C(C=C1)C(\C=O)=C\C1=CC=CC=C1Cl	FC1=CC=C(C=C1)C(\C=O)=C\C1=CC=CC=C1Cl	TRUE	DTXCID50654178	FC1=CC=C(C=C1)C(C=O)=CC1=CC=CC=C1Cl	FALSE	C1=CC=C(C(=C1)C=C(C=O)C2=CC=C(C=C2)F)Cl	FALSE	deviating cis/trans isomer	InChI=1S/C15H10ClFO/c16-15-4-2-1-3-12(15)9-13(10-18)11-5-7-14(17)8-6-11/h1-10H/b13-9+	InChI=1S/C15H10ClFO/c16-15-4-2-1-3-12(15)9-13(10-18)11-5-7-14(17)8-6-11/h1-10H	InChI=1S/C15H10ClFO/c16-15-4-2-1-3-12(15)9-13(10-18)11-5-7-14(17)8-6-11/h1-10H	FALSE	FALSE	C(=C/C1=C(Cl)C=CC=C1)(\C=O)/C2=CC=C(F)C=C2	InChI=1S/C15H10ClFO/c16-15-4-2-1-3-12(15)9-13(10-18)11-5-7-14(17)8-6-11/h1-10H/b13-9-	FALSE
6820	100.232.614	.beta.-D-Glucopyranoside, (2R)-3,4-dihydro-2,8-dimethyl-2-[(4R,8R)-4,8,12-trimethyltridecyl]-2H-1-benzopyran-6-yl	-					805-675-2	102340-61-4	no	organic	mono-constituent substance	FULL	≥ 1 to < 10 tonnes	CC(C)CCC[C@@H](C)CCC[C@@H](C)CCC[C@]1(C)CCC2=CC(O[C@@H]3O[C@H](CO)[C@@H](O)[C@H](O)[C@H]3O)=CC(C)=C2O1	InChI=1S/C33H56O7/c1-21(2)10-7-11-22(3)12-8-13-23(4)14-9-16-33(6)17-15-25-19-26(18-24(5)31(25)40-33)38-32-30(37)29(36)28(35)27(20-34)39-32/h18-19,21-23,27-30,32,34-37H,7-17,20H2,1-6H3/t22-,23-,27-,28-,29+,30-,32-,33-/m1/s1	CC(C)CCC[C@H](C)CCC[C@H](C)CCC[C@]1(C)CCC2=C(O1)C(C)=CC(O[C@@H]1O[C@H](CO)[C@@H](O)[C@H](O)[C@H]1O)=C2	CC(C)CCC[C@H](C)CCC[C@H](C)CCC[C@]1(C)CCC2=C(O1)C(C)=CC(O[C@@H]1O[C@H](CO)[C@@H](O)[C@H](O)[C@H]1O)=C2	TRUE	DTXCID001323643	CC(C)CCC[C@@H](C)CCC[C@@H](C)CCC[C@]1(C)CCC2=CC(O[C@@H]3O[C@H](CO)[C@@H](O)[C@H](O)[C@H]3O)=CC(C)=C2O1	FALSE	CC1=CC(=CC2=C1O[C@](CC2)(C)CCC[C@H](C)CCC[C@H](C)CCCC(C)C)O[C@H]3[C@@H]([C@H]([C@@H]([C@H](O3)CO)O)O)O	FALSE	deviating stereochemistry	InChI=1S/C33H56O7/c1-21(2)10-7-11-22(3)12-8-13-23(4)14-9-16-33(6)17-15-25-19-26(18-24(5)31(25)40-33)38-32-30(37)29(36)28(35)27(20-34)39-32/h18-19,21-23,27-30,32,34-37H,7-17,20H2,1-6H3/t22-,23-,27+,28+,29-,30+,32+,33+/m0/s1	InChI=1S/C33H56O7/c1-21(2)10-7-11-22(3)12-8-13-23(4)14-9-16-33(6)17-15-25-19-26(18-24(5)31(25)40-33)38-32-30(37)29(36)28(35)27(20-34)39-32/h18-19,21-23,27-30,32,34-37H,7-17,20H2,1-6H3/t22-,23-,27-,28-,29+,30-,32-,33-/m1/s1	InChI=1S/C33H56O7/c1-21(2)10-7-11-22(3)12-8-13-23(4)14-9-16-33(6)17-15-25-19-26(18-24(5)31(25)40-33)38-32-30(37)29(36)28(35)27(20-34)39-32/h18-19,21-23,27-30,32,34-37H,7-17,20H2,1-6H3/t22-,23-,27-,28-,29+,30-,32-,33-/m1/s1	FALSE	FALSE
8490	100.102.270	3-(6-O-(6-desoxy-α-.sc.l.sc.-mannopyranosyl-O-(α-.sc.d.sc.-glucopyranosyl)-(β-.sc.d.sc.-glucopyranosyl)oxy)-2-(3,4-dihydroxyphenyl)-5,7-dihydroxy-4H-1-benzopyran-4-one	-					424-170-4	130603-71-3	no	organic	mono-constituent substance	NONS	Tonnage data confidential	C[C@@H]1O[C@@H](OC[C@H]2O[C@@H](OC3=C(OC4=CC(O)=CC(O)=C4C3=O)C3=CC(O)=C(O)C=C3)[C@H](O)[C@@H](O)[C@@H]2O[C@H]2O[C@H](CO)[C@@H](O)[C@H](O)[C@H]2O)[C@H](O)[C@H](O)[C@H]1O		[H][C@]1(O[C@H]2[C@H](O)[C@@H](O)C(OC3=C(OC4=C(C(O)=CC(O)=C4)C3=O)C3=CC(O)=C(O)C=C3)O[C@@H]2COC2O[C@@H](C)[C@H](O)[C@@H](O)[C@H]2O)O[C@@H](O)[C@H](O)[C@@H](O)[C@@H]1CO	[H][C@]1(O[C@H]2[C@H](O)[C@@H](O)C(OC3=C(OC4=C(C(O)=CC(O)=C4)C3=O)C3=CC(O)=C(O)C=C3)O[C@@H]2COC2O[C@@H](C)[C@H](O)[C@@H](O)[C@H]2O)O[C@@H](O)[C@H](O)[C@@H](O)[C@@H]1CO	TRUE	DTXCID1079125	C[C@@H]1O[C@@H](OC[C@H]2O[C@@H](OC3=C(OC4=CC(O)=CC(O)=C4C3=O)C3=CC(O)=C(O)C=C3)[C@H](O)[C@@H](O)[C@@H]2O[C@H]2O[C@H](CO)[C@@H](O)[C@H](O)[C@H]2O)[C@H](O)[C@H](O)[C@H]1O	FALSE	C[C@H]1[C@@H]([C@H]([C@H]([C@@H](O1)OC[C@@H]2[C@H]([C@@H]([C@H]([C@@H](O2)OC3=C(OC4=CC(=CC(=C4C3=O)O)O)C5=CC(=C(C=C5)O)O)O)O)O[C@@H]6[C@@H]([C@H]([C@@H]([C@H](O6)CO)O)O)O)O)O)O	OK	deviating stereochemistry	InChI=1S/C33H40O21/c1-9-19(39)22(42)25(45)32(49-9)48-8-17-28(52-31-12(7-34)20(40)24(44)30(47)54-31)23(43)26(46)33(51-17)53-29-21(41)18-15(38)5-11(35)6-16(18)50-27(29)10-2-3-13(36)14(37)4-10/h2-6,9,12,17,19-20,22-26,28,30-40,42-47H,7-8H2,1H3/t9-,12-,17+,19-,20-,22+,23+,24+,25+,26+,28+,30+,31-,32?,33?/m0/s1	InChI=1S/C33H40O21/c1-9-19(39)22(42)25(45)31(49-9)48-8-17-29(53-32-26(46)23(43)20(40)16(7-34)51-32)24(44)27(47)33(52-17)54-30-21(41)18-14(38)5-11(35)6-15(18)50-28(30)10-2-3-12(36)13(37)4-10/h2-6,9,16-17,19-20,22-27,29,31-40,42-47H,7-8H2,1H3/t9-,16+,17+,19-,20+,22+,23-,24+,25+,26+,27+,29+,31+,32+,33-/m0/s1	InChI=1S/C33H40O21/c1-9-19(39)22(42)25(45)31(49-9)48-8-17-29(53-32-26(46)23(43)20(40)16(7-34)51-32)24(44)27(47)33(52-17)54-30-21(41)18-14(38)5-11(35)6-15(18)50-28(30)10-2-3-12(36)13(37)4-10/h2-6,9,16-17,19-20,22-27,29,31-40,42-47H,7-8H2,1H3/t9-,16+,17+,19-,20+,22+,23-,24+,25+,26+,27+,29+,31+,32+,33-/m0/s1	FALSE	FALSE
13986	100.102.166	(2S,4Z)-5-amino-2-(dibenzylamino)-1,6-diphenylhex-4-en-3-one;5-amino-[2S-di(methylphenyl)amino]-1,6-diphenyl-4Z-hexen-3-one	-					423-090-7	156732-13-7	no	organic	mono-constituent substance	NONS	Tonnage data confidential	C1=CC=C(C=C1)C[C@@H](C(=O)/C=C(/CC2=CC=CC=C2)\N)N(CC3=CC=CC=C3)CC4=CC=CC=C4		NC(CC1=CC=CC=C1)=CC(=O)[C@@H](CC1=CC=CC=C1)N(CC1=CC=CC=C1)CC1=CC=CC=C1	NC(CC1=CC=CC=C1)=CC(=O)[C@@H](CC1=CC=CC=C1)N(CC1=CC=CC=C1)CC1=CC=CC=C1	TRUE	DTXCID601364148	[H]C(=C(N)CC1=CC=CC=C1)C(=O)[C@]([H])(CC1=CC=CC=C1)N(CC1=CC=CC=C1)CC1=CC=CC=C1	FALSE	C1=CC=C(C=C1)C[C@@H](C(=O)/C=C(/CC2=CC=CC=C2)\N)N(CC3=CC=CC=C3)CC4=CC=CC=C4	FALSE	deviating stereochemistry	InChI=1S/C32H32N2O/c33-30(21-26-13-5-1-6-14-26)23-32(35)31(22-27-15-7-2-8-16-27)34(24-28-17-9-3-10-18-28)25-29-19-11-4-12-20-29/h1-20,23,31H,21-22,24-25,33H2/t31-/m1/s1	InChI=1S/C32H32N2O/c33-30(21-26-13-5-1-6-14-26)23-32(35)31(22-27-15-7-2-8-16-27)34(24-28-17-9-3-10-18-28)25-29-19-11-4-12-20-29/h1-20,23,31H,21-22,24-25,33H2/t31-/m0/s1	InChI=1S/C32H32N2O/c33-30(21-26-13-5-1-6-14-26)23-32(35)31(22-27-15-7-2-8-16-27)34(24-28-17-9-3-10-18-28)25-29-19-11-4-12-20-29/h1-20,23,31H,21-22,24-25,33H2/b30-23-/t31-/m0/s1	FALSE	FALSE	[C@H](N(CC1=CC=CC=C1)CC2=CC=CC=C2)(CC3=CC=CC=C3)C(C=C(CC4=CC=CC=C4)N)=O	InChI=1S/C32H32N2O/c33-30(21-26-13-5-1-6-14-26)23-32(35)31(22-27-15-7-2-8-16-27)34(24-28-17-9-3-10-18-28)25-29-19-11-4-12-20-29/h1-20,23,31H,21-22,24-25,33H2/t31-/m0/s1
2989	100.101.208	(1S,4R,6R,7R)-(4-nitrophenylmethyl)3-methylene-1-oxo-7-phenylacetamido-cepham-4-carboxylate	-					412-800-0	76109-32-5	no	organic	mono-constituent substance	NONS	No longer valid	N(C(CC1=CC=CC=C1)=O)[C@H]2[C@@]3(N([C@@H](C(OCC4=CC=C(N(=O)=O)C=C4)=O)C(=C)C[S@@]3=O)C2=O)[H]		[H][C@]1(NC(=O)CC2=CC=CC=C2)C(=O)N2[C@H](C(=O)OCC3=CC=C(C=C3)N(=O)=O)C(=C)CS(=O)[C@@]12[H]	[H][C@]1(NC(=O)CC2=CC=CC=C2)C(=O)N2[C@H](C(=O)OCC3=CC=C(C=C3)N(=O)=O)C(=C)CS(=O)[C@@]12[H]	TRUE						deviating stereochemistry	InChI=1S/C23H21N3O7S/c1-14-13-34(32)22-19(24-18(27)11-15-5-3-2-4-6-15)21(28)25(22)20(14)23(29)33-12-16-7-9-17(10-8-16)26(30)31/h2-10,19-20,22H,1,11-13H2,(H,24,27)/t19-,20-,22-,34?/m0/s1					N(C(CC1=CC=CC=C1)=O)[C@H]2[C@@]3(N([C@@H](C(OCC4=CC=C(N(=O)=O)C=C4)=O)C(=C)C[S@@]3=O)C2=O)[H]	InChI=1S/C23H21N3O7S/c1-14-13-34(32)22-19(24-18(27)11-15-5-3-2-4-6-15)21(28)25(22)20(14)23(29)33-12-16-7-9-17(10-8-16)26(30)31/h2-10,19-20,22H,1,11-13H2,(H,24,27)/t19-,20-,22-,34+/m1/s1	FALSE
25378	100.211.105	N2-Isobutyryl-5′-O-(4,4′-dimethoxytrityl)-2′-deoxyguanosine-3′-O-[O-(2-cyanoethyl)-N,N′-diisopropylphosphoramidite]	-					685-519-6	93183-15-4	no	organic	mono-constituent substance	FULL	≥ 0 to < 10 tonnes	CC(C)C(=O)NC1=NC2=C(C(=O)N1)N=CN2[C@H]3C[C@@H]([C@H](O3)COC(C4=CC=CC=C4)(C5=CC=C(C=C5)OC)C6=CC=C(C=C6)OC)OP(N(C(C)C)C(C)C)OCCC#N		[H][C@@]1(C[C@@]([H])(OP(OCCC#N)N(C(C)C)C(C)C)[C@@]([H])(COC(C2=CC=CC=C2)(C2=CC=C(OC)C=C2)C2=CC=C(OC)C=C2)O1)N1C=NC2=C1N=C(NC(=O)C(C)C)NC2=O	[H][C@@]1(C[C@@]([H])(OP(OCCC#N)N(C(C)C)C(C)C)[C@@]([H])(COC(C2=CC=CC=C2)(C2=CC=C(OC)C=C2)C2=CC=C(OC)C=C2)O1)N1C=NC2=C1N=C(NC(=O)C(C)C)NC2=O	TRUE				CC(C)C(=O)NC1=NC2=C(C(=O)N1)N=CN2[C@H]3C[C@@H]([C@H](O3)COC(C4=CC=CC=C4)(C5=CC=C(C=C5)OC)C6=CC=C(C=C6)OC)OP(N(C(C)C)C(C)C)OCCC#N	FALSE	deviating stereochemistry	InChI=1S/C44H54N7O8P/c1-28(2)41(52)48-43-47-40-39(42(53)49-43)46-27-50(40)38-25-36(59-60(57-24-12-23-45)51(29(3)4)30(5)6)37(58-38)26-56-44(31-13-10-9-11-14-31,32-15-19-34(54-7)20-16-32)33-17-21-35(55-8)22-18-33/h9-11,13-22,27-30,36-38H,12,24-26H2,1-8H3,(H2,47,48,49,52,53)/t36-,37-,38-,60?/m1/s1		InChI=1S/C44H54N7O8P/c1-28(2)41(52)48-43-47-40-39(42(53)49-43)46-27-50(40)38-25-36(59-60(57-24-12-23-45)51(29(3)4)30(5)6)37(58-38)26-56-44(31-13-10-9-11-14-31,32-15-19-34(54-7)20-16-32)33-17-21-35(55-8)22-18-33/h9-11,13-22,27-30,36-38H,12,24-26H2,1-8H3,(H2,47,48,49,52,53)/t36-,37+,38+,60?/m0/s1		FALSE
13997	100.101.502	cis-1-benzoyl-4-[(4-methylsulfonyl)oxy]-L-proline	-					416-040-0	120807-02-5	no	organic	mono-constituent substance	INTERMEDIATE	Intermediate use only	[H][C@]1(CN(C(=O)C2=CC=CC=C2)[C@@]([H])(C1)C(O)=O)OS(C)(=O)=O		CS(=O)(=O)O[C@@H]1C[C@@H](N(C1)C(=O)C1=CC=CC=C1)C(O)=O	CS(=O)(=O)O[C@@H]1C[C@@H](N(C1)C(=O)C1=CC=CC=C1)C(O)=O	TRUE	DTXCID101352415	[H][C@]1(CN(C(=O)C2=CC=CC=C2)[C@@]([H])(C1)C(O)=O)OS(C)(=O)=O	FALSE	CS(=O)(=O)O[C@H]1C[C@H](N(C1)C(=O)C2=CC=CC=C2)C(=O)O	FALSE	deviating stereochemistry	InChI=1S/C13H15NO6S/c1-21(18,19)20-10-7-11(13(16)17)14(8-10)12(15)9-5-3-2-4-6-9/h2-6,10-11H,7-8H2,1H3,(H,16,17)/t10-,11-/m1/s1	InChI=1S/C13H15NO6S/c1-21(18,19)20-10-7-11(13(16)17)14(8-10)12(15)9-5-3-2-4-6-9/h2-6,10-11H,7-8H2,1H3,(H,16,17)/t10-,11-/m0/s1	InChI=1S/C13H15NO6S/c1-21(18,19)20-10-7-11(13(16)17)14(8-10)12(15)9-5-3-2-4-6-9/h2-6,10-11H,7-8H2,1H3,(H,16,17)/t10-,11-/m0/s1	FALSE	FALSE
20638	100.001.765	trans-menthone	-	InChI=1S/C10H18O/c1-7(2)9-5-4-8(3)6-10(9)11/h7-9H,4-6H2,1-3H3/t8?,9-/m1/s1	FALSE	FALSE	deviating stereochemistry	201-941-1	89-80-5	no	organic	mono-constituent substance	FULL	≥ 100 to < 1000 tonnes	C[C@@H]1CC[C@H](C(=O)C1)C(C)C	InChI=1S/C10H18O/c1-7(2)9-5-4-8(3)6-10(9)11/h7-9H,4-6H2,1-3H3/t8-,9+/m1/s1	CC(C)[C@H]1CC[C@H](C)CC1=O	CC(C)[C@H]1CC[C@H](C)CC1=O	TRUE	DTXCID0024478	CC(C)[C@H]1CC[C@H](C)CC1=O	FALSE	C[C@@H]1CC[C@H](C(=O)C1)C(C)C	OK	deviating stereochemistry	InChI=1S/C10H18O/c1-7(2)9-5-4-8(3)6-10(9)11/h7-9H,4-6H2,1-3H3/t8-,9+/m0/s1	InChI=1S/C10H18O/c1-7(2)9-5-4-8(3)6-10(9)11/h7-9H,4-6H2,1-3H3/t8-,9+/m0/s1	InChI=1S/C10H18O/c1-7(2)9-5-4-8(3)6-10(9)11/h7-9H,4-6H2,1-3H3/t8-,9+/m1/s1	TRUE	FALSE
23343	100.045.121	(2α,4aα,8β)-hexahydro-1,1,5,5-tetramethyl-2H-2,4a-methanonaphthalen-8(5H)-one	CC1(C)[C@@H]2CCC3(C2)C1C(=O)CCC3(C)C	InChI=1S/C15H24O/c1-13(2)7-6-11(16)12-14(3,4)10-5-8-15(12,13)9-10/h10,12H,5-9H2,1-4H3/t10-,12?,15?/m1/s1	FALSE	FALSE	deviating stereochemistry	249-648-8	29461-13-0	no	organic	mono-constituent substance	FULL	Cease manufacture	CC1(CCC(=O)[C@H]2[C@@]13CC[C@@H](C3)C2(C)C)C	InChI=1S/C15H24O/c1-13(2)7-6-11(16)12-14(3,4)10-5-8-15(12,13)9-10/h10,12H,5-9H2,1-4H3/t10-,12+,15-/m0/s1	CC1(C)[C@@H]2CC[C@@]3(C2)[C@H]1C(=O)CCC3(C)C	CC1(C)[C@@H]2CC[C@@]3(C2)[C@H]1C(=O)CCC3(C)C	TRUE				CC1(CCC(=O)[C@H]2[C@@]13CC[C@@H](C3)C2(C)C)C	FALSE	deviating stereochemistry	InChI=1S/C15H24O/c1-13(2)7-6-11(16)12-14(3,4)10-5-8-15(12,13)9-10/h10,12H,5-9H2,1-4H3/t10-,12+,15-/m1/s1		InChI=1S/C15H24O/c1-13(2)7-6-11(16)12-14(3,4)10-5-8-15(12,13)9-10/h10,12H,5-9H2,1-4H3/t10-,12+,15-/m0/s1		FALSE
16664	100.105.288	1,2-Pyrrolidinedicarboxylic acid, 5-oxo-, 1-(1,1-dimethylethyl) 2-ethyl ester, (2S)-	CC(C)(C)CCOC(=O)[C@@H]1CCC(=O)N1C(O)=O	InChI=1S/C12H19NO5/c1-12(2,3)6-7-18-10(15)8-4-5-9(14)13(8)11(16)17/h8H,4-7H2,1-3H3,(H,16,17)/t8-/m0/s1	FALSE	FALSE	inconsistent structure	480-250-9	144978-12-1	no	organic	mono-constituent substance	INTERMEDIATE	Intermediate use only	CCOC(=O)[C@@H]1CCC(=O)N1C(=O)OC(C)(C)C	InChI=1S/C12H19NO5/c1-5-17-10(15)8-6-7-9(14)13(8)11(16)18-12(2,3)4/h8H,5-7H2,1-4H3/t8-/m0/s1	CCOC(=O)[C@H]1CCC(=O)N1C(=O)OC(C)(C)C	CCOC(=O)[C@H]1CCC(=O)N1C(=O)OC(C)(C)C	TRUE	DTXCID70307311	CCOC(=O)[C@@H]1CCC(=O)N1C(=O)OC(C)(C)C	FALSE	CCOC(=O)[C@@H]1CCC(=O)N1C(=O)OC(C)(C)C	FALSE	deviating stereochemistry	InChI=1S/C12H19NO5/c1-5-17-10(15)8-6-7-9(14)13(8)11(16)18-12(2,3)4/h8H,5-7H2,1-4H3/t8-/m1/s1	InChI=1S/C12H19NO5/c1-5-17-10(15)8-6-7-9(14)13(8)11(16)18-12(2,3)4/h8H,5-7H2,1-4H3/t8-/m0/s1	InChI=1S/C12H19NO5/c1-5-17-10(15)8-6-7-9(14)13(8)11(16)18-12(2,3)4/h8H,5-7H2,1-4H3/t8-/m0/s1	FALSE	FALSE
12997	100.103.106	tert-butyl(6-{2-[4-(4-fluorophenyl)-6-isopropyl-2-[methyl(methylsulfonyl)amino]pyrimidin-5-yl]vinyl}(4S,6S)-2,2-dimethyl[1,3]dioxan-4-yl)acetate	CC(C)C1=NC(=NC(C2=CC=C(F)C=C2)=C1C=C[C@@H]1C[C@H](OC(C)(C)O1)C(C([O-])=O)C(C)(C)C)N(C)S(C)(=O)=O	InChI=1S/C29H40FN3O6S/c1-17(2)24-21(15-14-20-16-22(39-29(6,7)38-20)23(26(34)35)28(3,4)5)25(18-10-12-19(30)13-11-18)32-27(31-24)33(8)40(9,36)37/h10-15,17,20,22-23H,16H2,1-9H3,(H,34,35)/p-1/t20-,22+,23?/m1/s1	FALSE	FALSE	inconsistent structure	432-810-9	1379976-09-6	no	organic	mono-constituent substance	INTERMEDIATE	Intermediate use only	C(=C[C@@H]1C[C@@H](CC(OC(C)(C)C)=O)OC(C)(C)O1)C=2C(=NC(N(S(C)(=O)=O)C)=NC2C(C)C)C3=CC=C(F)C=C3	InChI=1S/C29H40FN3O6S/c1-18(2)25-23(15-14-21-16-22(38-29(6,7)37-21)17-24(34)39-28(3,4)5)26(19-10-12-20(30)13-11-19)32-27(31-25)33(8)40(9,35)36/h10-15,18,21-22H,16-17H2,1-9H3/t21-,22+/m1/s1	CC(C)C1=NC(=NC(C2=CC=C(F)C=C2)=C1C=C[C@@H]1C[C@H](CC(=O)OC(C)(C)C)OC(C)(C)O1)N(C)S(C)(=O)=O	CC(C)C1=NC(=NC(C2=CC=C(F)C=C2)=C1C=C[C@@H]1C[C@H](CC(=O)OC(C)(C)C)OC(C)(C)O1)N(C)S(C)(=O)=O	TRUE	DTXCID501379653			CC(C)C1=NC(=NC(=C1C=C[C@@H]2C[C@@H](OC(O2)(C)C)CC(=O)OC(C)(C)C)C3=CC=C(C=C3)F)N(C)S(=O)(=O)C	FALSE	deviating stereochemistry	InChI=1S/C29H40FN3O6S/c1-18(2)25-23(15-14-21-16-22(38-29(6,7)37-21)17-24(34)39-28(3,4)5)26(19-10-12-20(30)13-11-19)32-27(31-25)33(8)40(9,35)36/h10-15,18,21-22H,16-17H2,1-9H3/t21-,22-/m1/s1		InChI=1S/C29H40FN3O6S/c1-18(2)25-23(15-14-21-16-22(38-29(6,7)37-21)17-24(34)39-28(3,4)5)26(19-10-12-20(30)13-11-19)32-27(31-25)33(8)40(9,35)36/h10-15,18,21-22H,16-17H2,1-9H3/t21-,22-/m1/s1		TRUE	C(=C[C@@H]1C[C@@H](CC(OC(C)(C)C)=O)OC(C)(C)O1)C=2C(=NC(N(S(C)(=O)=O)C)=NC2C(C)C)C3=CC=C(F)C=C3	InChI=1S/C29H40FN3O6S/c1-18(2)25-23(15-14-21-16-22(38-29(6,7)37-21)17-24(34)39-28(3,4)5)26(19-10-12-20(30)13-11-19)32-27(31-25)33(8)40(9,35)36/h10-15,18,21-22H,16-17H2,1-9H3/t21-,22+/m1/s1	FALSE
3605	100.102.888	(R)-3-[(1-methylpyrrolidin-2-yl)methyl]-5-[2-(phenylsulfonyl)ethenyl]-1H-indole	CN1CCC[C@@H]1CC1=CNC2=C1C=C(C=CS(=O)(=O)C1=CC=CC=C1)C=C2	InChI=1S/C22H24N2O2S/c1-24-12-5-6-19(24)15-18-16-23-22-10-9-17(14-21(18)22)11-13-27(25,26)20-7-3-2-4-8-20/h2-4,7-11,13-14,16,19,23H,5-6,12,15H2,1H3/t19-/m1/s1	FALSE	FALSE	missing cis/trans isomers	430-560-5	180637-89-2	no	organic	mono-constituent substance	NONS	Tonnage data confidential	CN1CCC[C@@H]1CC2=CNC3=C2C=C(C=C3)/C=C/S(=O)(=O)C4=CC=CC=C4	InChI=1S/C22H24N2O2S/c1-24-12-5-6-19(24)15-18-16-23-22-10-9-17(14-21(18)22)11-13-27(25,26)20-7-3-2-4-8-20/h2-4,7-11,13-14,16,19,23H,5-6,12,15H2,1H3/b13-11+/t19-/m1/s1	CN1CCC[C@H]1CC1=CNC2=CC=C(C=CS(=O)(=O)C3=CC=CC=C3)C=C12	CN1CCC[C@H]1CC1=CNC2=CC=C(C=CS(=O)(=O)C3=CC=CC=C3)C=C12	TRUE	DTXCID601436319	[H]\C(=C(\[H])S(=O)(=O)C1=CC=CC=C1)C1=CC2=C(NC=C2C[C@]2([H])CCCN2C)C=C1	FALSE	CN1CCC[C@@H]1CC2=CNC3=C2C=C(C=C3)/C=C/S(=O)(=O)C4=CC=CC=C4	OK	deviating stereochemistry	InChI=1S/C22H24N2O2S/c1-24-12-5-6-19(24)15-18-16-23-22-10-9-17(14-21(18)22)11-13-27(25,26)20-7-3-2-4-8-20/h2-4,7-11,13-14,16,19,23H,5-6,12,15H2,1H3/t19-/m0/s1	InChI=1S/C22H24N2O2S/c1-24-12-5-6-19(24)15-18-16-23-22-10-9-17(14-21(18)22)11-13-27(25,26)20-7-3-2-4-8-20/h2-4,7-11,13-14,16,19,23H,5-6,12,15H2,1H3/b13-11+/t19-/m0/s1	InChI=1S/C22H24N2O2S/c1-24-12-5-6-19(24)15-18-16-23-22-10-9-17(14-21(18)22)11-13-27(25,26)20-7-3-2-4-8-20/h2-4,7-11,13-14,16,19,23H,5-6,12,15H2,1H3/b13-11+/t19-/m1/s1	FALSE	FALSE
4957	100.100.429	Exo-1-methyl-4-(1-methylethyl)-7-oxabicyclo[2.2.1]heptan-2-ol	CC(C)C12CCC(C)(O1)C(O)C2	InChI=1S/C10H18O2/c1-7(2)10-5-4-9(3,12-10)8(11)6-10/h7-8,11H,4-6H2,1-3H3	FALSE	FALSE	missing stereochemistry	402-470-6	87172-89-2	no	organic	mono-constituent substance	NONS	Tonnage data confidential	CC(C)[C@@]12CC[C@@](O1)([C@H](C2)O)C	InChI=1S/C10H18O2/c1-7(2)10-5-4-9(3,12-10)8(11)6-10/h7-8,11H,4-6H2,1-3H3/t8-,9+,10-/m0/s1	CC(C)C12CC[C@](C)(O1)[C@@H](O)C2	CC(C)C12CC[C@](C)(O1)[C@@H](O)C2	TRUE				CC(C)[C@@]12CC[C@@](O1)([C@H](C2)O)C	FALSE	deviating stereochemistry	InChI=1S/C10H18O2/c1-7(2)10-5-4-9(3,12-10)8(11)6-10/h7-8,11H,4-6H2,1-3H3/t8-,9-,10?/m0/s1		InChI=1S/C10H18O2/c1-7(2)10-5-4-9(3,12-10)8(11)6-10/h7-8,11H,4-6H2,1-3H3/t8-,9+,10-/m0/s1		FALSE
21343	100.061.570	cis-2-(2,4-dichlorophenyl)-2-(1H-1,2,4-triazol-1-ylmethyl)-1,3-dioxolane-4-methanol	OCC1COC(CN2C=NC=N2)(O1)C1=C(Cl)C=C(Cl)C=C1	InChI=1S/C13H13Cl2N3O3/c14-9-1-2-11(12(15)3-9)13(6-18-8-16-7-17-18)20-5-10(4-19)21-13/h1-3,7-8,10,19H,4-6H2	FALSE	FALSE	missing stereochemistry	267-747-4	67914-85-6	no	organic	mono-constituent substance	FULL	Cease manufacture	[H][C@]1(CO)CO[C@@](CN2C=NC=N2)(O1)C1=CC=C(Cl)C=C1Cl	InChI=1S/C13H13Cl2N3O3/c14-9-1-2-11(12(15)3-9)13(6-18-8-16-7-17-18)20-5-10(4-19)21-13/h1-3,7-8,10,19H,4-6H2/t10-,13-/m0/s1	OC[C@@H]1CO[C@](CN2C=NC=N2)(O1)C1=CC=C(Cl)C=C1Cl	OC[C@@H]1CO[C@](CN2C=NC=N2)(O1)C1=CC=C(Cl)C=C1Cl	TRUE	DTXCID201520586	[H][C@]1(CO)CO[C@@](CN2C=NC=N2)(O1)C1=CC=C(Cl)C=C1Cl	FALSE	C1[C@H](O[C@](O1)(CN2C=NC=N2)C3=C(C=C(C=C3)Cl)Cl)CO	FALSE	deviating stereochemistry	InChI=1S/C13H13Cl2N3O3/c14-9-1-2-11(12(15)3-9)13(6-18-8-16-7-17-18)20-5-10(4-19)21-13/h1-3,7-8,10,19H,4-6H2/t10-,13-/m1/s1	InChI=1S/C13H13Cl2N3O3/c14-9-1-2-11(12(15)3-9)13(6-18-8-16-7-17-18)20-5-10(4-19)21-13/h1-3,7-8,10,19H,4-6H2/t10-,13-/m0/s1	InChI=1S/C13H13Cl2N3O3/c14-9-1-2-11(12(15)3-9)13(6-18-8-16-7-17-18)20-5-10(4-19)21-13/h1-3,7-8,10,19H,4-6H2/t10-,13-/m1/s1	FALSE	TRUE
9647	100.100.840	(2RS,3SR)-3-(2-chlorophenyl)-2-(4-fluorophenyl)-[( 1H-1,2,4-triazol-1-yl)methyl]oxirane	FC1=CC=C(C=C1)C1(CN2C=NC=N2)OC1C1=C(Cl)C=CC=C1	InChI=1S/C17H13ClFN3O/c18-15-4-2-1-3-14(15)16-17(23-16,9-22-11-20-10-21-22)12-5-7-13(19)8-6-12/h1-8,10-11,16H,9H2	FALSE	FALSE	missing stereochemistry	406-850-2	133855-98-8	no	organic	mono-constituent substance	FULL	≥ 100 to < 1000 tonnes	FC1=CC=C(C=C1)[C@@]1(CN2C=NC=N2)O[C@@H]1C1=C(Cl)C=CC=C1	InChI=1S/C17H13ClFN3O/c18-15-4-2-1-3-14(15)16-17(23-16,9-22-11-20-10-21-22)12-5-7-13(19)8-6-12/h1-8,10-11,16H,9H2/t16-,17-/m1/s1	FC1=CC=C(C=C1)[C@]1(CN2C=NC=N2)O[C@@H]1C1=C(Cl)C=CC=C1	FC1=CC=C(C=C1)[C@]1(CN2C=NC=N2)O[C@@H]1C1=C(Cl)C=CC=C1	TRUE	DTXCID801518894	FC1=CC=C(C=C1)[C@@]1(CN2C=NC=N2)O[C@@H]1C1=C(Cl)C=CC=C1	FALSE	C1=CC=C(C(=C1)[C@@H]2[C@@](O2)(CN3C=NC=N3)C4=CC=C(C=C4)F)Cl	OK	deviating stereochemistry	InChI=1S/C17H13ClFN3O/c18-15-4-2-1-3-14(15)16-17(23-16,9-22-11-20-10-21-22)12-5-7-13(19)8-6-12/h1-8,10-11,16H,9H2/t16-,17+/m1/s1	InChI=1S/C17H13ClFN3O/c18-15-4-2-1-3-14(15)16-17(23-16,9-22-11-20-10-21-22)12-5-7-13(19)8-6-12/h1-8,10-11,16H,9H2/t16-,17-/m1/s1	InChI=1S/C17H13ClFN3O/c18-15-4-2-1-3-14(15)16-17(23-16,9-22-11-20-10-21-22)12-5-7-13(19)8-6-12/h1-8,10-11,16H,9H2/t16-,17-/m1/s1	FALSE	FALSE
3424	100.104.168	1-(4-(propyloxyphenyl)ethynyl)-trans-4-(4-propylcyclohexyl)benzene	CCCOC1=CC=C(C=C1)C#CC1=CC=C(C=C1)C1CCC(CCC)CC1	InChI=1S/C26H32O/c1-3-5-21-8-14-24(15-9-21)25-16-10-22(11-17-25)6-7-23-12-18-26(19-13-23)27-20-4-2/h10-13,16-19,21,24H,3-5,8-9,14-15,20H2,1-2H3	FALSE	FALSE	missing stereochemistry	448-430-1	348113-98-4	no	organic	mono-constituent substance	NONS	No longer valid	C(#CC1=CC=C(CCC)C=C1)C2=CC=C(C=C2)[C@@]3(CC[C@@H](OCCC)CC3)[H]	InChI=1S/C26H32O/c1-3-5-21-6-8-22(9-7-21)10-11-23-12-14-24(15-13-23)25-16-18-26(19-17-25)27-20-4-2/h6-9,12-15,25-26H,3-5,16-20H2,1-2H3/t25-,26-	[H][C@]1(CCC)CC[C@@]([H])(CC1)C1=CC=C(C=C1)C#CC1=CC=C(OCCC)C=C1	[H][C@]1(CCC)CC[C@@]([H])(CC1)C1=CC=C(C=C1)C#CC1=CC=C(OCCC)C=C1	TRUE						deviating stereochemistry	InChI=1S/C26H32O/c1-3-5-21-8-14-24(15-9-21)25-16-10-22(11-17-25)6-7-23-12-18-26(19-13-23)27-20-4-2/h10-13,16-19,21,24H,3-5,8-9,14-15,20H2,1-2H3/t21-,24-				FALSE	C(#CC1=CC=C(CCC)C=C1)C2=CC=C(C=C2)[C@@]3(CC[C@@H](OCCC)CC3)[H]	InChI=1S/C26H32O/c1-3-5-21-6-8-22(9-7-21)10-11-23-12-14-24(15-13-23)25-16-18-26(19-17-25)27-20-4-2/h6-9,12-15,25-26H,3-5,16-20H2,1-2H3/t25-,26-	FALSE
31622	100.020.427	(R*,R*)-1,4-dimercaptobutane-2,3-diol	-	InChI=1S/C4H10O2S2/c5-3(1-7)4(6)2-8/h3-8H,1-2H2/t3-,4?/m0/s1	FALSE	FALSE	missing stereochemistry	222-468-7	3483-12-3	no	organic	mono-constituent substance	FULL	≥ 10 to < 100 tonnes	O[C@H](CS)[C@H](O)CS	InChI=1S/C4H10O2S2/c5-3(1-7)4(6)2-8/h3-8H,1-2H2/t3-,4-/m1/s1	O[C@@H](CS)[C@@H](O)CS	O[C@@H](CS)[C@@H](O)CS	TRUE	DTXCID00820548	O[C@H](CS)[C@H](O)CS		C([C@H]([C@@H](CS)O)O)S		deviating stereochemistry	InChI=1S/C4H10O2S2/c5-3(1-7)4(6)2-8/h3-8H,1-2H2/t3-,4-/m0/s1	InChI=1S/C4H10O2S2/c5-3(1-7)4(6)2-8/h3-8H,1-2H2/t3-,4-/m1/s1	InChI=1S/C4H10O2S2/c5-3(1-7)4(6)2-8/h3-8H,1-2H2/t3-,4-/m1/s1	FALSE	TRUE
11997	100.238.697	Cyclopentaneacetic acid, 3-oxo-2-pentyl-, methyl ester, (1R,2S)-rel-	-	InChI=1S/C13H22O3/c1-3-4-5-6-11-10(7-8-12(11)14)9-13(15)16-2/h10-11H,3-9H2,1-2H3/t10-,11+/m1/s1	FALSE	TRUE		810-495-2	93452-03-0	no	organic	mono-constituent substance	FULL	≥ 1 to < 10 tonnes	C(C(OC)=O)[C@H]1[C@@H](CCCCC)C(=O)CC1	InChI=1S/C13H22O3/c1-3-4-5-6-11-10(7-8-12(11)14)9-13(15)16-2/h10-11H,3-9H2,1-2H3/t10-,11+/m0/s1	CCCCC[C@H]1[C@@H](CC(=O)OC)CCC1=O	CCCCC[C@H]1[C@@H](CC(=O)OC)CCC1=O	TRUE						deviating stereochemistry	InChI=1S/C13H22O3/c1-3-4-5-6-11-10(7-8-12(11)14)9-13(15)16-2/h10-11H,3-9H2,1-2H3/t10-,11+/m1/s1					C(C(OC)=O)[C@H]1[C@@H](CCCCC)C(=O)CC1	InChI=1S/C13H22O3/c1-3-4-5-6-11-10(7-8-12(11)14)9-13(15)16-2/h10-11H,3-9H2,1-2H3/t10-,11+/m0/s1	FALSE
23832	100.218.431	1,3-Dioxane, 2-[4-[difluoro(3,4,5-trifluorophenoxy)methyl]-3,5- difluorophenyl]-5-(trans-4-propylcyclohexyl)-, trans-	-	InChI=1S/C26H27F7O3/c1-2-3-14-4-6-15(7-5-14)17-12-34-25(35-13-17)16-8-19(27)23(20(28)9-16)26(32,33)36-18-10-21(29)24(31)22(30)11-18/h8-11,14-15,17,25H,2-7,12-13H2,1H3/t14-,15-,17?,25-	FALSE	TRUE		700-701-8	798556-07-7	no	organic	mono-constituent substance	FULL	≥ 0 to < 10 tonnes	[H][C@@]1(CC[C@H](CCC)CC1)[C@@]1([H])CO[C@@H](OC1)C1=CC(F)=C(C(F)=C1)C(F)(F)OC1=CC(F)=C(F)C(F)=C1	InChI=1S/C26H27F7O3/c1-2-3-14-4-6-15(7-5-14)17-12-34-25(35-13-17)16-8-19(27)23(20(28)9-16)26(32,33)36-18-10-21(29)24(31)22(30)11-18/h8-11,14-15,17,25H,2-7,12-13H2,1H3/t14-,15-,17-,25-	CCC[C@H]1CC[C@@H](CC1)C1CO[C@@H](OC1)C1=CC(F)=C(C(F)=C1)C(F)(F)OC1=CC(F)=C(F)C(F)=C1	CCC[C@H]1CC[C@@H](CC1)C1CO[C@@H](OC1)C1=CC(F)=C(C(F)=C1)C(F)(F)OC1=CC(F)=C(F)C(F)=C1	TRUE	DTXCID401506164	[H][C@@]1(CC[C@H](CCC)CC1)[C@@]1([H])CO[C@@H](OC1)C1=CC(F)=C(C(F)=C1)C(F)(F)OC1=CC(F)=C(F)C(F)=C1	FALSE			deviating stereochemistry	InChI=1S/C26H27F7O3/c1-2-3-14-4-6-15(7-5-14)17-12-34-25(35-13-17)16-8-19(27)23(20(28)9-16)26(32,33)36-18-10-21(29)24(31)22(30)11-18/h8-11,14-15,17,25H,2-7,12-13H2,1H3/t14-,15-,17?,25-	InChI=1S/C26H27F7O3/c1-2-3-14-4-6-15(7-5-14)17-12-34-25(35-13-17)16-8-19(27)23(20(28)9-16)26(32,33)36-18-10-21(29)24(31)22(30)11-18/h8-11,14-15,17,25H,2-7,12-13H2,1H3/t14-,15-,17-,25-		FALSE
24296	100.118.968	Trans-2-[4'-[Difluor(3,4,5-trifluorphenoxy)methyl]-3',5'-difluor[1,1'-biphenyl]-4-yl]-5-propyl-tetrahydro-2H-pyran	-	InChI=1S/C27H23F7O2/c1-2-3-15-4-9-24(35-14-15)17-7-5-16(6-8-17)18-10-20(28)25(21(29)11-18)27(33,34)36-19-12-22(30)26(32)23(31)13-19/h5-8,10-13,15,24H,2-4,9,14H2,1H3/t15-,24+/m0/s1	FALSE	TRUE		615-063-5	700863-48-5	no	organic	mono-constituent substance	FULL	≥ 0 to < 10 tonnes	FC=1C=C(C=C(F)C1C(OC2=CC(F)=C(F)C(F)=C2)(F)F)C3=CC=C(C=C3)[C@@H]4CC[C@@H](CCC)CO4	InChI=1S/C27H23F7O2/c1-2-3-15-4-9-24(35-14-15)17-7-5-16(6-8-17)18-10-20(28)25(21(29)11-18)27(33,34)36-19-12-22(30)26(32)23(31)13-19/h5-8,10-13,15,24H,2-4,9,14H2,1H3/t15-,24+/m1/s1	CCC[C@H]1CC[C@@H](OC1)C1=CC=C(C=C1)C1=CC(F)=C(C(F)=C1)C(F)(F)OC1=CC(F)=C(F)C(F)=C1	CCC[C@H]1CC[C@@H](OC1)C1=CC=C(C=C1)C1=CC(F)=C(C(F)=C1)C(F)(F)OC1=CC(F)=C(F)C(F)=C1	TRUE						deviating stereochemistry	InChI=1S/C27H23F7O2/c1-2-3-15-4-9-24(35-14-15)17-7-5-16(6-8-17)18-10-20(28)25(21(29)11-18)27(33,34)36-19-12-22(30)26(32)23(31)13-19/h5-8,10-13,15,24H,2-4,9,14H2,1H3/t15-,24+/m0/s1					FC=1C=C(C=C(F)C1C(OC2=CC(F)=C(F)C(F)=C2)(F)F)C3=CC=C(C=C3)[C@@H]4CC[C@@H](CCC)CO4	InChI=1S/C27H23F7O2/c1-2-3-15-4-9-24(35-14-15)17-7-5-16(6-8-17)18-10-20(28)25(21(29)11-18)27(33,34)36-19-12-22(30)26(32)23(31)13-19/h5-8,10-13,15,24H,2-4,9,14H2,1H3/t15-,24+/m1/s1	FALSE
13040	100.100.470	N-(N6-trifluoroacetyl-L-lysyl)-L-proline	N[C@@H](CCCCNC(=O)C(F)(F)F)C(=O)N1CCC[C@H]1C(O)=O	InChI=1S/C13H20F3N3O4/c14-13(15,16)12(23)18-6-2-1-4-8(17)10(20)19-7-3-5-9(19)11(21)22/h8-9H,1-7,17H2,(H,18,23)(H,21,22)/t8-,9-/m0/s1	TRUE			402-920-1	103300-89-6	no	organic	mono-constituent substance	FULL	≥ 0 tonnes	[H][C@]1(CCCN1C(=O)[C@@H](N)CCCCNC(=O)C(F)(F)F)C(O)=O	InChI=1S/C13H20F3N3O4/c14-13(15,16)12(23)18-6-2-1-4-8(17)10(20)19-7-3-5-9(19)11(21)22/h8-9H,1-7,17H2,(H,18,23)(H,21,22)/t8-,9-/m0/s1	N[C@H](CCCCNC(=O)C(F)(F)F)C(=O)N1CCC[C@H]1C(O)=O	N[C@H](CCCCNC(=O)C(F)(F)F)C(=O)N1CCC[C@H]1C(O)=O	TRUE	DTXCID001768362	[H][C@]1(CCCN1C(=O)[C@@H](N)CCCCNC(=O)C(F)(F)F)C(O)=O	FALSE	C1C[C@H](N(C1)C(=O)[C@H](CCCCNC(=O)C(F)(F)F)N)C(=O)O	FALSE	deviating stereochemistry	InChI=1S/C13H20F3N3O4/c14-13(15,16)12(23)18-6-2-1-4-8(17)10(20)19-7-3-5-9(19)11(21)22/h8-9H,1-7,17H2,(H,18,23)(H,21,22)/t8-,9+/m1/s1	InChI=1S/C13H20F3N3O4/c14-13(15,16)12(23)18-6-2-1-4-8(17)10(20)19-7-3-5-9(19)11(21)22/h8-9H,1-7,17H2,(H,18,23)(H,21,22)/t8-,9-/m0/s1	InChI=1S/C13H20F3N3O4/c14-13(15,16)12(23)18-6-2-1-4-8(17)10(20)19-7-3-5-9(19)11(21)22/h8-9H,1-7,17H2,(H,18,23)(H,21,22)/t8-,9-/m0/s1	FALSE	FALSE
9448	100.103.895	Spiro[bicyclo[2.2.1]heptane-2,4'-[1,3]dioxane], 1,7,7-trimethyl-2'-(1-methylethyl)-, (1R,2S,2'S,4R)-	CC(C)[C@H]1OCC[C@]2(C[C@H]3CC[C@]2(C)C3(C)C)O1	InChI=1S/C16H28O2/c1-11(2)13-17-9-8-16(18-13)10-12-6-7-15(16,5)14(12,3)4/h11-13H,6-10H2,1-5H3/t12-,13+,15-,16-/m1/s1	TRUE			443-460-1	188199-50-0	no	organic	mono-constituent substance	FULL	≥ 1 tonnes	CC(C)[C@H]1OCC[C@]2(C[C@H]3CC[C@]2(C)C3(C)C)O1	InChI=1S/C16H28O2/c1-11(2)13-17-9-8-16(18-13)10-12-6-7-15(16,5)14(12,3)4/h11-13H,6-10H2,1-5H3/t12-,13+,15-,16-/m1/s1	CC(C)[C@@H]1OCC[C@]2(C[C@H]3CC[C@@]2(C)C3(C)C)O1	CC(C)[C@@H]1OCC[C@]2(C[C@H]3CC[C@@]2(C)C3(C)C)O1	TRUE	DTXCID601028356	CC(C)[C@H]1OCC[C@]2(C[C@H]3CC[C@]2(C)C3(C)C)O1	FALSE	CC(C)[C@H]1OCC[C@@]2(O1)C[C@H]3CC[C@@]2(C3(C)C)C	FALSE	deviating stereochemistry	InChI=1S/C16H28O2/c1-11(2)13-17-9-8-16(18-13)10-12-6-7-15(16,5)14(12,3)4/h11-13H,6-10H2,1-5H3/t12-,13-,15+,16-/m1/s1	InChI=1S/C16H28O2/c1-11(2)13-17-9-8-16(18-13)10-12-6-7-15(16,5)14(12,3)4/h11-13H,6-10H2,1-5H3/t12-,13+,15-,16-/m1/s1	InChI=1S/C16H28O2/c1-11(2)13-17-9-8-16(18-13)10-12-6-7-15(16,5)14(12,3)4/h11-13H,6-10H2,1-5H3/t12-,13+,15-,16-/m1/s1	FALSE	FALSE	C[C@]12[C@@]3(C[C@]([C@@]1(C)C)(CC2)[H])O[C@@H]([C@H](C)C)OCC3
4351	100.104.967	Butanedioic acid, 2,3-bis[(4-methoxybenzoyl)oxy]-, (2S,3S)-	COC1=CC=C(C=C1)C(=O)O[C@@H]([C@H](OC(=O)C1=CC=C(OC)C=C1)C(O)=O)C(O)=O	InChI=1S/C20H18O10/c1-27-13-7-3-11(4-8-13)19(25)29-15(17(21)22)16(18(23)24)30-20(26)12-5-9-14(28-2)10-6-12/h3-10,15-16H,1-2H3,(H,21,22)(H,23,24)/t15-,16-/m0/s1	TRUE			471-150-6	191605-10-4	no	organic	mono-constituent substance	NONS	Tonnage data confidential	COC1=CC=C(C=C1)C(=O)O[C@@H]([C@@H](C(=O)O)OC(=O)C2=CC=C(C=C2)OC)C(=O)O	InChI=1S/C20H18O10/c1-27-13-7-3-11(4-8-13)19(25)29-15(17(21)22)16(18(23)24)30-20(26)12-5-9-14(28-2)10-6-12/h3-10,15-16H,1-2H3,(H,21,22)(H,23,24)/t15-,16-/m0/s1	COC1=CC=C(C=C1)C(=O)O[C@H]([C@@H](OC(=O)C1=CC=C(OC)C=C1)C(O)=O)C(O)=O	COC1=CC=C(C=C1)C(=O)O[C@H]([C@@H](OC(=O)C1=CC=C(OC)C=C1)C(O)=O)C(O)=O	TRUE				COC1=CC=C(C=C1)C(=O)O[C@@H]([C@@H](C(=O)O)OC(=O)C2=CC=C(C=C2)OC)C(=O)O	FALSE	deviating stereochemistry	InChI=1S/C20H18O10/c1-27-13-7-3-11(4-8-13)19(25)29-15(17(21)22)16(18(23)24)30-20(26)12-5-9-14(28-2)10-6-12/h3-10,15-16H,1-2H3,(H,21,22)(H,23,24)/t15-,16-/m1/s1		InChI=1S/C20H18O10/c1-27-13-7-3-11(4-8-13)19(25)29-15(17(21)22)16(18(23)24)30-20(26)12-5-9-14(28-2)10-6-12/h3-10,15-16H,1-2H3,(H,21,22)(H,23,24)/t15-,16-/m0/s1		FALSE
7282	100.119.755	Androstane-3,17-diol, 2-(4-morpholinyl)-16-(1-pyrrolidinyl)-, (2.beta.,3.alpha.,5.alpha.,16.beta.,17.beta.)-	C[C@]12CC[C@H]3[C@@H](CC[C@H]4C[C@H](O)[C@H](C[C@]34C)N3CCOCC3)[C@@H]1C[C@@H]([C@@H]2O)N1CCCC1	InChI=1S/C27H46N2O3/c1-26-8-7-20-19(21(26)16-22(25(26)31)28-9-3-4-10-28)6-5-18-15-24(30)23(17-27(18,20)2)29-11-13-32-14-12-29/h18-25,30-31H,3-17H2,1-2H3/t18-,19+,20-,21-,22-,23-,24-,25-,26-,27-/m0/s1	TRUE			601-595-5	119302-20-4	no	organic	mono-constituent substance	FULL	Cease manufacture	C[C@]12CC[C@H]3[C@H]([C@@H]1C[C@@H]([C@@H]2O)N4CCCC4)CC[C@@H]5[C@@]3(C[C@@H]([C@H](C5)O)N6CCOCC6)C	InChI=1S/C27H46N2O3/c1-26-8-7-20-19(21(26)16-22(25(26)31)28-9-3-4-10-28)6-5-18-15-24(30)23(17-27(18,20)2)29-11-13-32-14-12-29/h18-25,30-31H,3-17H2,1-2H3/t18-,19+,20-,21-,22-,23-,24-,25-,26-,27-/m0/s1	C[C@]12CC[C@@H]3[C@@H](CCC4CC(O)C(C[C@]34C)N3CCOCC3)[C@@H]1CC(C2O)N1CCCC1	C[C@]12CC[C@@H]3[C@@H](CCC4CC(O)C(C[C@]34C)N3CCOCC3)[C@@H]1CC(C2O)N1CCCC1	TRUE				C[C@]12CC[C@H]3[C@H]([C@@H]1C[C@@H]([C@@H]2O)N4CCCC4)CC[C@@H]5[C@@]3(C[C@@H]([C@H](C5)O)N6CCOCC6)C	FALSE	deviating stereochemistry	InChI=1S/C27H46N2O3/c1-26-8-7-20-19(21(26)16-22(25(26)31)28-9-3-4-10-28)6-5-18-15-24(30)23(17-27(18,20)2)29-11-13-32-14-12-29/h18-25,30-31H,3-17H2,1-2H3/t18?,19-,20-,21+,22?,23?,24?,25?,26+,27+/m1/s1		InChI=1S/C27H46N2O3/c1-26-8-7-20-19(21(26)16-22(25(26)31)28-9-3-4-10-28)6-5-18-15-24(30)23(17-27(18,20)2)29-11-13-32-14-12-29/h18-25,30-31H,3-17H2,1-2H3/t18-,19+,20-,21-,22-,23-,24-,25-,26-,27-/m0/s1		FALSE
24707	100.060.532	N-benzoyl-5'-O-(p,p'-dimethoxytrityl)-2'-deoxycytidine	COC1=CC=C(C=C1)C(OC[C@H]1O[C@H](C[C@@H]1O)N1C=CC(NC(=O)C2=CC=CC=C2)=NC1=O)(C1=CC=CC=C1)C1=CC=C(OC)C=C1	InChI=1S/C37H35N3O7/c1-44-29-17-13-27(14-18-29)37(26-11-7-4-8-12-26,28-15-19-30(45-2)20-16-28)46-24-32-31(41)23-34(47-32)40-22-21-33(39-36(40)43)38-35(42)25-9-5-3-6-10-25/h3-22,31-32,34,41H,23-24H2,1-2H3,(H,38,39,42,43)/t31-,32+,34+/m0/s1	TRUE			266-605-9	67219-55-0	no	organic	mono-constituent substance	FULL	≥ 0 to < 10 tonnes	COC1=CC=C(C=C1)C(OC[C@H]1O[C@H](C[C@@H]1O)N1C=CC(NC(=O)C2=CC=CC=C2)=NC1=O)(C1=CC=CC=C1)C1=CC=C(OC)C=C1	InChI=1S/C37H35N3O7/c1-44-29-17-13-27(14-18-29)37(26-11-7-4-8-12-26,28-15-19-30(45-2)20-16-28)46-24-32-31(41)23-34(47-32)40-22-21-33(39-36(40)43)38-35(42)25-9-5-3-6-10-25/h3-22,31-32,34,41H,23-24H2,1-2H3,(H,38,39,42,43)/t31-,32+,34+/m0/s1	COC1=CC=C(C=C1)C(OC[C@H]1O[C@H](C[C@H]1O)N1C=CC(NC(=O)C2=CC=CC=C2)=NC1=O)(C1=CC=CC=C1)C1=CC=C(OC)C=C1	COC1=CC=C(C=C1)C(OC[C@H]1O[C@H](C[C@H]1O)N1C=CC(NC(=O)C2=CC=CC=C2)=NC1=O)(C1=CC=CC=C1)C1=CC=C(OC)C=C1	TRUE		COC1=CC=C(C=C1)C(OC[C@H]1O[C@H](C[C@@H]1O)N1C=CC(NC(=O)C2=CC=CC=C2)=NC1=O)(C1=CC=CC=C1)C1=CC=C(OC)C=C1	FALSE	COC1=CC=C(C=C1)C(C2=CC=CC=C2)(C3=CC=C(C=C3)OC)OC[C@@H]4[C@H](C[C@@H](O4)N5C=CC(=NC5=O)NC(=O)C6=CC=CC=C6)O	FALSE	deviating stereochemistry	InChI=1S/C37H35N3O7/c1-44-29-17-13-27(14-18-29)37(26-11-7-4-8-12-26,28-15-19-30(45-2)20-16-28)46-24-32-31(41)23-34(47-32)40-22-21-33(39-36(40)43)38-35(42)25-9-5-3-6-10-25/h3-22,31-32,34,41H,23-24H2,1-2H3,(H,38,39,42,43)/t31-,32-,34-/m1/s1	InChI=1S/C37H35N3O7/c1-44-29-17-13-27(14-18-29)37(26-11-7-4-8-12-26,28-15-19-30(45-2)20-16-28)46-24-32-31(41)23-34(47-32)40-22-21-33(39-36(40)43)38-35(42)25-9-5-3-6-10-25/h3-22,31-32,34,41H,23-24H2,1-2H3,(H,38,39,42,43)/t31-,32+,34+/m0/s1	InChI=1S/C37H35N3O7/c1-44-29-17-13-27(14-18-29)37(26-11-7-4-8-12-26,28-15-19-30(45-2)20-16-28)46-24-32-31(41)23-34(47-32)40-22-21-33(39-36(40)43)38-35(42)25-9-5-3-6-10-25/h3-22,31-32,34,41H,23-24H2,1-2H3,(H,38,39,42,43)/t31-,32+,34+/m0/s1	FALSE	FALSE
10295	100.234.407	L-Glutamic acid, N-(1-oxododecyl)-, 1,5-dioctadecyl ester	CCCCCCCCCCCCCCCCCCOC(=O)CC[C@H](NC(=O)CCCCCCCCCCC)C(=O)OCCCCCCCCCCCCCCCCCC	InChI=1S/C53H103NO5/c1-4-7-10-13-16-19-21-23-25-27-29-31-34-37-40-43-48-58-52(56)47-46-50(54-51(55)45-42-39-36-33-18-15-12-9-6-3)53(57)59-49-44-41-38-35-32-30-28-26-24-22-20-17-14-11-8-5-2/h50H,4-49H2,1-3H3,(H,54,55)/t50-/m0/s1	TRUE			807-033-7	55258-21-4	no	organic	mono-constituent substance	FULL	≥ 1 to < 10 tonnes	CCCCCCCCCCCCCCCCCCOC(=O)CC[C@H](NC(=O)CCCCCCCCCCC)C(=O)OCCCCCCCCCCCCCCCCCC	InChI=1S/C53H103NO5/c1-4-7-10-13-16-19-21-23-25-27-29-31-34-37-40-43-48-58-52(56)47-46-50(54-51(55)45-42-39-36-33-18-15-12-9-6-3)53(57)59-49-44-41-38-35-32-30-28-26-24-22-20-17-14-11-8-5-2/h50H,4-49H2,1-3H3,(H,54,55)/t50-/m0/s1	CCCCCCCCCCCCCCCCCCOC(=O)CC[C@@H](NC(=O)CCCCCCCCCCC)C(=O)OCCCCCCCCCCCCCCCCCC	CCCCCCCCCCCCCCCCCCOC(=O)CC[C@@H](NC(=O)CCCCCCCCCCC)C(=O)OCCCCCCCCCCCCCCCCCC	TRUE	DTXCID30126262	CCCCCCCCCCCCCCCCCCOC(=O)CC[C@H](NC(=O)CCCCCCCCCCC)C(=O)OCCCCCCCCCCCCCCCCCC	FALSE	CCCCCCCCCCCCCCCCCCOC(=O)CC[C@@H](C(=O)OCCCCCCCCCCCCCCCCCC)NC(=O)CCCCCCCCCCC	OK	deviating stereochemistry	InChI=1S/C53H103NO5/c1-4-7-10-13-16-19-21-23-25-27-29-31-34-37-40-43-48-58-52(56)47-46-50(54-51(55)45-42-39-36-33-18-15-12-9-6-3)53(57)59-49-44-41-38-35-32-30-28-26-24-22-20-17-14-11-8-5-2/h50H,4-49H2,1-3H3,(H,54,55)/t50-/m1/s1	InChI=1S/C53H103NO5/c1-4-7-10-13-16-19-21-23-25-27-29-31-34-37-40-43-48-58-52(56)47-46-50(54-51(55)45-42-39-36-33-18-15-12-9-6-3)53(57)59-49-44-41-38-35-32-30-28-26-24-22-20-17-14-11-8-5-2/h50H,4-49H2,1-3H3,(H,54,55)/t50-/m0/s1	InChI=1S/C53H103NO5/c1-4-7-10-13-16-19-21-23-25-27-29-31-34-37-40-43-48-58-52(56)47-46-50(54-51(55)45-42-39-36-33-18-15-12-9-6-3)53(57)59-49-44-41-38-35-32-30-28-26-24-22-20-17-14-11-8-5-2/h50H,4-49H2,1-3H3,(H,54,55)/t50-/m0/s1	FALSE	FALSE
14138	100.008.177	6-aminopenicillanic acid	CC1(C)S[C@@H]2[C@H](N)C(=O)N2[C@H]1C(O)=O	InChI=1S/C8H12N2O3S/c1-8(2)4(7(12)13)10-5(11)3(9)6(10)14-8/h3-4,6H,9H2,1-2H3,(H,12,13)/t3-,4+,6-/m1/s1	TRUE			208-993-4	551-16-6	no	organic	mono-constituent substance	FULL	≥ 1000 to < 10000 tonnes	CC1(C)S[C@@H]2[C@H](N)C(=O)N2[C@H]1C(O)=O	InChI=1S/C8H12N2O3S/c1-8(2)4(7(12)13)10-5(11)3(9)6(10)14-8/h3-4,6H,9H2,1-2H3,(H,12,13)/t3-,4+,6-/m1/s1	[H][C@]12SC(C)(C)[C@@H](N1C(=O)C2N)C(O)=O	[H][C@]12SC(C)(C)[C@@H](N1C(=O)C2N)C(O)=O	TRUE	DTXCID5026097	CC1(C)S[C@@H]2[C@H](N)C(=O)N2[C@H]1C(O)=O	FALSE	CC1([C@@H](N2[C@H](S1)[C@@H](C2=O)N)C(=O)O)C	OK	deviating stereochemistry	InChI=1S/C8H12N2O3S/c1-8(2)4(7(12)13)10-5(11)3(9)6(10)14-8/h3-4,6H,9H2,1-2H3,(H,12,13)/t3?,4-,6+/m0/s1	InChI=1S/C8H12N2O3S/c1-8(2)4(7(12)13)10-5(11)3(9)6(10)14-8/h3-4,6H,9H2,1-2H3,(H,12,13)/t3-,4+,6-/m1/s1	InChI=1S/C8H12N2O3S/c1-8(2)4(7(12)13)10-5(11)3(9)6(10)14-8/h3-4,6H,9H2,1-2H3,(H,12,13)/t3-,4+,6-/m1/s1	FALSE	FALSE
1528	100.105.111	L-Glutamine, L-alanyl-	C[C@H](N)C(=O)N[C@@H](CCC(N)=O)C(O)=O	InChI=1S/C8H15N3O4/c1-4(9)7(13)11-5(8(14)15)2-3-6(10)12/h4-5H,2-3,9H2,1H3,(H2,10,12)(H,11,13)(H,14,15)/t4-,5-/m0/s1	TRUE			475-290-9	39537-23-0	no	organic	mono-constituent substance	FULL	≥ 1 to < 10 tonnes	C[C@H](N)C(=O)N[C@@H](CCC(N)=O)C(O)=O	InChI=1S/C8H15N3O4/c1-4(9)7(13)11-5(8(14)15)2-3-6(10)12/h4-5H,2-3,9H2,1H3,(H2,10,12)(H,11,13)(H,14,15)/t4-,5-/m0/s1	C[C@H](N)C(=O)N[C@H](CCC(N)=O)C(O)=O	C[C@H](N)C(=O)N[C@H](CCC(N)=O)C(O)=O	TRUE	DTXCID60115149	C[C@H](N)C(=O)N[C@@H](CCC(N)=O)C(O)=O	FALSE	C[C@@H](C(=O)N[C@@H](CCC(=O)N)C(=O)O)N	FALSE	deviating stereochemistry	InChI=1S/C8H15N3O4/c1-4(9)7(13)11-5(8(14)15)2-3-6(10)12/h4-5H,2-3,9H2,1H3,(H2,10,12)(H,11,13)(H,14,15)/t4-,5+/m0/s1	InChI=1S/C8H15N3O4/c1-4(9)7(13)11-5(8(14)15)2-3-6(10)12/h4-5H,2-3,9H2,1H3,(H2,10,12)(H,11,13)(H,14,15)/t4-,5-/m0/s1	InChI=1S/C8H15N3O4/c1-4(9)7(13)11-5(8(14)15)2-3-6(10)12/h4-5H,2-3,9H2,1H3,(H2,10,12)(H,11,13)(H,14,15)/t4-,5-/m0/s1	FALSE	FALSE	[C@H](NC([C@H](C)N)=O)(CCC(N)=O)C(O)=O
9096	100.100.940	(R)-2-(4-hydroxyphenoxy)propanoic acid	C[C@@H](OC1=CC=C(O)C=C1)C(O)=O	InChI=1S/C9H10O4/c1-6(9(11)12)13-8-4-2-7(10)3-5-8/h2-6,10H,1H3,(H,11,12)/t6-/m1/s1	TRUE			407-960-3	94050-90-5	no	organic	mono-constituent substance	NONS	Tonnage data confidential	C[C@@H](OC1=CC=C(O)C=C1)C(O)=O	InChI=1S/C9H10O4/c1-6(9(11)12)13-8-4-2-7(10)3-5-8/h2-6,10H,1H3,(H,11,12)/t6-/m1/s1	C[C@H](OC1=CC=C(O)C=C1)C(O)=O	C[C@H](OC1=CC=C(O)C=C1)C(O)=O	TRUE	DTXCID20162851	C[C@@H](OC1=CC=C(O)C=C1)C(O)=O	FALSE	C[C@H](C(=O)O)OC1=CC=C(C=C1)O	OK	deviating stereochemistry	InChI=1S/C9H10O4/c1-6(9(11)12)13-8-4-2-7(10)3-5-8/h2-6,10H,1H3,(H,11,12)/t6-/m0/s1	InChI=1S/C9H10O4/c1-6(9(11)12)13-8-4-2-7(10)3-5-8/h2-6,10H,1H3,(H,11,12)/t6-/m1/s1	InChI=1S/C9H10O4/c1-6(9(11)12)13-8-4-2-7(10)3-5-8/h2-6,10H,1H3,(H,11,12)/t6-/m1/s1	FALSE	FALSE
5161	100.012.062	cis-3,5,5-trimethylcyclohexan-1-ol	-	InChI=1S/C9H18O/c1-7-4-8(10)6-9(2,3)5-7/h7-8,10H,4-6H2,1-3H3/t7-,8+/m1/s1	TRUE			213-268-0	933-48-2	no	organic	mono-constituent substance	FULL	≥ 1 to < 10 tonnes	C[C@@H]1C[C@@H](CC(C1)(C)C)O	InChI=1S/C9H18O/c1-7-4-8(10)6-9(2,3)5-7/h7-8,10H,4-6H2,1-3H3/t7-,8+/m1/s1	C[C@H]1C[C@@H](O)CC(C)(C)C1	C[C@H]1C[C@@H](O)CC(C)(C)C1	TRUE	DTXCID9027570	C[C@H]1C[C@@H](O)CC(C)(C)C1	FALSE	C[C@@H]1C[C@@H](CC(C1)(C)C)O	OK	deviating stereochemistry	InChI=1S/C9H18O/c1-7-4-8(10)6-9(2,3)5-7/h7-8,10H,4-6H2,1-3H3/t7-,8+/m0/s1	InChI=1S/C9H18O/c1-7-4-8(10)6-9(2,3)5-7/h7-8,10H,4-6H2,1-3H3/t7-,8+/m0/s1	InChI=1S/C9H18O/c1-7-4-8(10)6-9(2,3)5-7/h7-8,10H,4-6H2,1-3H3/t7-,8+/m1/s1	TRUE	FALSE
8447	100.102.371	2S-isopropyl-5R-methyl-1R-cyclohexyl (2R,5S)-5-(4-amino-2-oxo-2H-pyrimidin-1-yl)-[1.3]-oxathiolane-2-carboxylate	-					425-250-1	147027-10-9	no	organic	mono-constituent substance	NONS	Tonnage data confidential	C[C@@H]1CC[C@H]([C@@H](C1)OC(=O)[C@@H]2O[C@@H](CS2)N3C=CC(=NC3=O)N)C(C)C		CC(C)[C@@H]1CC[C@@H](C)CC1OC(=O)[C@@H]1O[C@@H](CS1)N1C=CC(N)=NC1=O	CC(C)[C@@H]1CC[C@@H](C)CC1OC(=O)[C@@H]1O[C@@H](CS1)N1C=CC(N)=NC1=O	TRUE	DTXCID601361687	[H][C@@]1(CS[C@]([H])(O1)C(=O)O[C@]1([H])C[C@@]([H])(C)CC[C@]1([H])C(C)C)N1C=CC(=N)N=C1O	FALSE	C[C@@H]1CC[C@H]([C@@H](C1)OC(=O)[C@@H]2O[C@@H](CS2)N3C=CC(=NC3=O)N)C(C)C	FALSE	ECHA DB: missing stereochemistry, CompTox: deviating stereochemistry	InChI=1S/C18H27N3O4S/c1-10(2)12-5-4-11(3)8-13(12)24-16(22)17-25-15(9-26-17)21-7-6-14(19)20-18(21)23/h6-7,10-13,15,17H,4-5,8-9H2,1-3H3,(H2,19,20,23)/t11-,12+,13?,15+,17-/m1/s1	InChI=1S/C18H27N3O4S/c1-10(2)12-5-4-11(3)8-13(12)24-16(22)17-25-15(9-26-17)21-7-6-14(19)20-18(21)23/h6-7,10-13,15,17H,4-5,8-9H2,1-3H3,(H2,19,20,23)/t11-,12+,13+,15+,17-/m0/s1	InChI=1S/C18H27N3O4S/c1-10(2)12-5-4-11(3)8-13(12)24-16(22)17-25-15(9-26-17)21-7-6-14(19)20-18(21)23/h6-7,10-13,15,17H,4-5,8-9H2,1-3H3,(H2,19,20,23)/t11-,12+,13-,15+,17-/m1/s1	FALSE	FALSE
4180	100.104.044	1,2-Cyclohexanedicarboxylic acid, (1R,2S)-rel-	-	InChI=1S/C8H12O4/c9-7(10)5-3-1-2-4-6(5)8(11)12/h5-6H,1-4H2,(H,9,10)(H,11,12)/t5-,6+	TRUE			445-870-6	610-09-3	no	organic	mono-constituent substance	NONS	Tonnage data confidential	C1CC[C@@H]([C@@H](C1)C(=O)O)C(=O)O	InChI=1S/C8H12O4/c9-7(10)5-3-1-2-4-6(5)8(11)12/h5-6H,1-4H2,(H,9,10)(H,11,12)/t5-,6+	OC(=O)C1CCCCC1C(O)=O	OC(=O)C1CCCCC1C(O)=O	TRUE	DTXCID101516459	OC(=O)[C@@H]1CCCC[C@H]1C(O)=O	FALSE	C1CC[C@@H]([C@@H](C1)C(=O)O)C(=O)O	FALSE	ECHA DB: missing stereochemistry, CompTox: deviating stereochemistry	InChI=1S/C8H12O4/c9-7(10)5-3-1-2-4-6(5)8(11)12/h5-6H,1-4H2,(H,9,10)(H,11,12)	InChI=1S/C8H12O4/c9-7(10)5-3-1-2-4-6(5)8(11)12/h5-6H,1-4H2,(H,9,10)(H,11,12)/t5-,6-/m1/s1	InChI=1S/C8H12O4/c9-7(10)5-3-1-2-4-6(5)8(11)12/h5-6H,1-4H2,(H,9,10)(H,11,12)/t5-,6+	FALSE	FALSE
8485	100.100.756	(-)-trans-4-(4'-fluorophenyl)-3-hydroxymethyl-N-methylpiperidine		InChI=1S/C13H18FNO/c1-15-7-6-13(11(8-15)9-16)10-2-4-12(14)5-3-10/h2-5,11,13,16H,6-9H2,1H3/t11-,13-/m1/s1	TRUE			406-030-4	105812-81-5	no	organic	mono-constituent substance	NONS	Tonnage data confidential	CN1CC[C@H]([C@@H](C1)CO)C2=CC=C(C=C2)F	InChI=1S/C13H18FNO/c1-15-7-6-13(11(8-15)9-16)10-2-4-12(14)5-3-10/h2-5,11,13,16H,6-9H2,1H3/t11-,13-/m1/s1	CN1CCC(C(CO)C1)C1=CC=C(F)C=C1	CN1CCC(C(CO)C1)C1=CC=C(F)C=C1	TRUE	DTXCID401338810	[H][C@@]1(CO)C[NH+](C)CC[C@@]1([H])C1=CC=C(F)C=C1	FALSE	CN1CC[C@H]([C@@H](C1)CO)C2=CC=C(C=C2)F	OK	ECHA DB: missing stereochemistry, CompTox: inconsistent structure	InChI=1S/C13H18FNO/c1-15-7-6-13(11(8-15)9-16)10-2-4-12(14)5-3-10/h2-5,11,13,16H,6-9H2,1H3	InChI=1S/C13H18FNO/c1-15-7-6-13(11(8-15)9-16)10-2-4-12(14)5-3-10/h2-5,11,13,16H,6-9H2,1H3/p+1/t11-,13-/m0/s1	InChI=1S/C13H18FNO/c1-15-7-6-13(11(8-15)9-16)10-2-4-12(14)5-3-10/h2-5,11,13,16H,6-9H2,1H3/t11-,13-/m0/s1	FALSE	FALSE
2380	100.104.673	Ethanol, 2,2′-[[4-[(2-methoxyethyl)imino]-3-nitrophenyl]amino]bis-, hydrochloride (1:1)	-					459-980-7	910463-51-3	no	organic	mono-constituent substance	NONS	Tonnage data confidential	Cl.COCCNC1=C(C=C(C=C1)N(CCO)CCO)[N+]([O-])=O	InChI=1S/C13H21N3O5.ClH/c1-21-9-4-14-12-3-2-11(10-13(12)16(19)20)15(5-7-17)6-8-18;/h2-3,10,14,17-18H,4-9H2,1H3;1H	COCCNC1=C(C=C(C=C1)N(CCO)CCO)N(=O)=O				Cl.COCCNC1=C(C=C(C=C1)N(CCO)CCO)[N+]([O-])=O		COCCNC1=C(C=C(C=C1)N(CCO)CCO)[N+](=O)[O-].Cl		inconsistent structure	InChI=1S/C13H21N3O5/c1-21-9-4-14-12-3-2-11(10-13(12)16(19)20)15(5-7-17)6-8-18/h2-3,10,14,17-18H,4-9H2,1H3	InChI=1S/C13H21N3O5.ClH/c1-21-9-4-14-12-3-2-11(10-13(12)16(19)20)15(5-7-17)6-8-18;/h2-3,10,14,17-18H,4-9H2,1H3;1H	InChI=1S/C13H21N3O5.ClH/c1-21-9-4-14-12-3-2-11(10-13(12)16(19)20)15(5-7-17)6-8-18;/h2-3,10,14,17-18H,4-9H2,1H3;1H	FALSE	FALSE	N(CCO)(CCO)C1=CC(N(=O)=O)=C(NCCOC)C=C1	InChI=1S/C13H21N3O5/c1-21-9-4-14-12-3-2-11(10-13(12)16(19)20)15(5-7-17)6-8-18/h2-3,10,14,17-18H,4-9H2,1H3	TRUE
4052	100.103.132	β-D-glucopyranose, 1,6-anhydro-2-azido-2-deoxy-4-O-(6-methyl-2,3-bis-O-(phenylmethyl)-β-D-glucopyranuronosyl)-3-acetate	-					433-070-1	115195-66-9	no	organic	mono-constituent substance	NONS	Tonnage data confidential	O([C@H]1[C@H](OC(C)=O)[C@@H](N=[N+]=[N-])[C@H]2O[C@@H]1CO2)[C@@H]3[C@H](OCC4=CC=CC=C4)[C@@H](OCC5=CC=CC=C5)[C@H](OCC6=CC=CC=C6)[C@@H](C(OC)=O)O3		[H][C@@]1(O[C@@H]2[C@H]3CO[C@H](O3)C(N=[N+]=[N-])[C@H]2OC(C)=O)O[C@@H]([C@@H](O)[C@H](OCC2=CC=CC=C2)[C@H]1OCC1=CC=CC=C1)C(=O)OC	[H][C@@]1(O[C@@H]2[C@H]3CO[C@H](O3)C(N=[N+]=[N-])[C@H]2OC(C)=O)O[C@@H]([C@@H](O)[C@H](OCC2=CC=CC=C2)[C@H]1OCC1=CC=CC=C1)C(=O)OC	TRUE						inconsistent structure	InChI=1S/C29H33N3O11/c1-16(33)40-23-20(31-32-30)28-39-15-19(41-28)22(23)42-29-26(38-14-18-11-7-4-8-12-18)24(21(34)25(43-29)27(35)36-2)37-13-17-9-5-3-6-10-17/h3-12,19-26,28-29,34H,13-15H2,1-2H3/t19-,20?,21+,22-,23-,24+,25+,26-,28-,29-/m1/s1					O([C@H]1[C@H](OC(C)=O)[C@@H](N=[N+]=[N-])[C@H]2O[C@@H]1CO2)[C@@H]3[C@H](OCC4=CC=CC=C4)[C@@H](OCC5=CC=CC=C5)[C@H](OCC6=CC=CC=C6)[C@@H](C(OC)=O)O3	InChI=1S/C36H39N3O11/c1-22(40)47-29-27(38-39-37)35-46-21-26(48-35)28(29)49-36-33(45-20-25-16-10-5-11-17-25)31(44-19-24-14-8-4-9-15-24)30(32(50-36)34(41)42-2)43-18-23-12-6-3-7-13-23/h3-17,26-33,35-36H,18-21H2,1-2H3/t26-,27-,28-,29-,30+,31+,32+,33-,35-,36+/m1/s1	FALSE
2215	100.003.707	1,4,5,6,7,7-hexachloro-8,9,10-trinorborn-5-ene-2,3-dicarboxylic anhydride	-					204-077-3	115-27-5	no	organic	mono-constituent substance	FULL	≥ 100 to < 1000 tonnes	ClC1=C(Cl)C2(Cl)C3C(C(=O)OC3=O)C1(Cl)C2(Cl)Cl		OC(=O)C1C(C(=O)OC(=O)C2C(C(O)=O)C3(Cl)C(Cl)=C(Cl)C2(Cl)C3(Cl)Cl)C2(Cl)C(Cl)=C(Cl)C1(Cl)C2(Cl)Cl	OC(=O)C1C(C(=O)OC(=O)C2C(C(O)=O)C3(Cl)C(Cl)=C(Cl)C2(Cl)C3(Cl)Cl)C2(Cl)C(Cl)=C(Cl)C1(Cl)C2(Cl)Cl	TRUE	DTXCID006941	ClC1=C(Cl)C2(Cl)C3C(C(=O)OC3=O)C1(Cl)C2(Cl)Cl	FALSE	C12C(C(=O)OC1=O)C3(C(=C(C2(C3(Cl)Cl)Cl)Cl)Cl)Cl	FALSE	inconsistent structure	InChI=1S/C18H6Cl12O7/c19-5-7(21)15(25)3(1(9(31)32)13(5,23)17(15,27)28)11(35)37-12(36)4-2(10(33)34)14(24)6(20)8(22)16(4,26)18(14,29)30/h1-4H,(H,31,32)(H,33,34)	InChI=1S/C9H2Cl6O3/c10-3-4(11)8(13)2-1(5(16)18-6(2)17)7(3,12)9(8,14)15/h1-2H	InChI=1S/C9H2Cl6O3/c10-3-4(11)8(13)2-1(5(16)18-6(2)17)7(3,12)9(8,14)15/h1-2H	FALSE	FALSE
11360	100.101.112	1,6-hexanediyl-bis(2-(2-(1-ethylpentyl)-3-oxazolidinyl)ethyl)carbamate	-					411-700-4	140921-24-0	no	organic	mono-constituent substance	FULL	≥ 100 to < 1000 tonnes	CCCCC(CC)C1OCCN1CCOC(=O)NCCCCCCNC(=O)OCCN1CCOC1C(CC)CCCC		CCCCC(CC)C1CCON1CCOC(=O)NCCCCCCNC(=O)OCCN1OCCC1C(CC)CCCC	CCCCC(CC)C1CCON1CCOC(=O)NCCCCCCNC(=O)OCCN1OCCC1C(CC)CCCC	TRUE	DTXCID90817801	CCCCC(CC)C1OCCN1CCOC(=O)NCCCCCCNC(=O)OCCN1CCOC1C(CC)CCCC	FALSE	CCCCC(CC)C1N(CCO1)CCOC(=O)NCCCCCCNC(=O)OCCN2CCOC2C(CC)CCCC	OK	inconsistent structure	InChI=1S/C32H62N4O6/c1-5-9-15-27(7-3)29-17-23-41-35(29)21-25-39-31(37)33-19-13-11-12-14-20-34-32(38)40-26-22-36-30(18-24-42-36)28(8-4)16-10-6-2/h27-30H,5-26H2,1-4H3,(H,33,37)(H,34,38)	InChI=1S/C32H62N4O6/c1-5-9-15-27(7-3)29-35(19-23-39-29)21-25-41-31(37)33-17-13-11-12-14-18-34-32(38)42-26-22-36-20-24-40-30(36)28(8-4)16-10-6-2/h27-30H,5-26H2,1-4H3,(H,33,37)(H,34,38)	InChI=1S/C32H62N4O6/c1-5-9-15-27(7-3)29-35(19-23-39-29)21-25-41-31(37)33-17-13-11-12-14-18-34-32(38)42-26-22-36-20-24-40-30(36)28(8-4)16-10-6-2/h27-30H,5-26H2,1-4H3,(H,33,37)(H,34,38)	FALSE	FALSE
19819	100.224.939	9,9'-Spirobi[9H-fluoren]-4-amine, N-[1,1'-biphenyl]-2-yl-N-(9,9-dimethyl-9H-fluoren-2-yl)-	-					700-681-0	1450933-44-4	no	organic	mono-constituent substance	FULL	≥ 0 to < 10 tonnes	C=1C=CC(=CC1)C=2C=CC=CC2N(C3=CC=C4C=5C=CC=CC5C(C4=C3)(C)C)C6=CC=CC7=C6C8=CC=CC=C8C97C=%10C=CC=CC%10C=%11C=CC=CC%119		CC1(C)C2=C(C=CC=C2)C2=C1C=C(C=C2)N(C1=CC2=C(C=C1)C1=C(C=CC=C1)C21C2=C(C=CC=C2)C2=C1C=CC=C2)C1=C(C=CC=C1)C1=CC=CC=C1	CC1(C)C2=C(C=CC=C2)C2=C1C=C(C=C2)N(C1=CC2=C(C=C1)C1=C(C=CC=C1)C21C2=C(C=CC=C2)C2=C1C=CC=C2)C1=C(C=CC=C1)C1=CC=CC=C1	TRUE	DTXCID401477622	CC1(C)C2=CC=CC=C2C2=C1C=C(C=C2)N(C1=CC=CC2=C1C1=CC=CC=C1C21C2=CC=CC=C2C2=C1C=CC=C2)C1=C(C=CC=C1)C1=CC=CC=C1	FALSE	CC1(C2=CC=CC=C2C3=C1C=C(C=C3)N(C4=CC=CC=C4C5=CC=CC=C5)C6=CC=CC7=C6C8=CC=CC=C8C79C1=CC=CC=C1C1=CC=CC=C91)C	FALSE	inconsistent structure	InChI=1S/C52H37N/c1-51(2)44-23-11-6-19-38(44)42-30-28-35(32-48(42)51)53(50-27-15-10-18-37(50)34-16-4-3-5-17-34)36-29-31-43-41-22-9-14-26-47(41)52(49(43)33-36)45-24-12-7-20-39(45)40-21-8-13-25-46(40)52/h3-33H,1-2H3	InChI=1S/C52H37N/c1-51(2)42-24-11-6-20-37(42)40-32-31-35(33-47(40)51)53(48-29-15-10-19-36(48)34-17-4-3-5-18-34)49-30-16-28-46-50(49)41-23-9-14-27-45(41)52(46)43-25-12-7-21-38(43)39-22-8-13-26-44(39)52/h3-33H,1-2H3	InChI=1S/C52H37N/c1-51(2)42-24-11-6-20-37(42)40-32-31-35(33-47(40)51)53(48-29-15-10-19-36(48)34-17-4-3-5-18-34)49-30-16-28-46-50(49)41-23-9-14-27-45(41)52(46)43-25-12-7-21-38(43)39-22-8-13-26-44(39)52/h3-33H,1-2H3	FALSE	FALSE	C=1C=CC(=CC1)C=2C=CC=CC2N(C3=CC=C4C=5C=CC=CC5C(C4=C3)(C)C)C6=CC=CC7=C6C8=CC=CC=C8C97C=%10C=CC=CC%10C=%11C=CC=CC%119
9257	100.100.555	9a-methylperhydrocyclopenta(f)coumarin-1-one	-					403-860-9	148292-46-0	no	organic	mono-constituent substance	NONS	Tonnage data confidential	CC12C3C(CCC1CCC2)OCCC3=O		CC12CCC3OC(=O)CCC3C1CCC2=O	CC12CCC3OC(=O)CCC3C1CCC2=O	TRUE						inconsistent structure	InChI=1S/C13H18O3/c1-13-7-6-10-8(2-5-12(15)16-10)9(13)3-4-11(13)14/h8-10H,2-7H2,1H3					CC12C3C(CCC1CCC2)OCCC3=O	InChI=1S/C13H20O2/c1-13-7-2-3-9(13)4-5-11-12(13)10(14)6-8-15-11/h9,11-12H,2-8H2,1H3	FALSE
30118	100.102.984	isostearic acid monoisopropanolamide	-					431-540-9	170573-32-7	no	organic	mono-constituent substance	FULL	≥ 0 to < 10 tonnes	C(NCC(C)O)(CCCCCCCCCCCCCCC(C)C)=O		CC(O)CNC(=O)C(C)(C)CCC(C)CCC(C)CCC(C)(C)C	CC(O)CNC(=O)C(C)(C)CCC(C)CCC(C)CCC(C)(C)C	TRUE						inconsistent structure	InChI=1S/C21H43NO2/c1-16(11-13-20(4,5)6)9-10-17(2)12-14-21(7,8)19(24)22-15-18(3)23/h16-18,23H,9-15H2,1-8H3,(H,22,24)					C(NCC(C)O)(CCCCCCCCCCCCCCC(C)C)=O	InChI=1S/C21H43NO2/c1-19(2)16-14-12-10-8-6-4-5-7-9-11-13-15-17-21(24)22-18-20(3)23/h19-20,23H,4-18H2,1-3H3,(H,22,24)	FALSE
14678	100.015.428	3,3',3'',5,5',5''-hexa-tert-butyl-α,α',α''-(mesitylene-2,4,6-triyl)tri-p-cresol	-					216-971-0	1709-70-2	no	organic	mono-constituent substance	FULL	≥ 1000 to < 10000 tonnes	CC1=C(CC2=CC(=C(O)C(=C2)C(C)(C)C)C(C)(C)C)C(C)=C(CC2=CC(=C(O)C(=C2)C(C)(C)C)C(C)(C)C)C(C)=C1CC1=CC(=C(O)C(=C1)C(C)(C)C)C(C)(C)C		CC1=C(CC2=C(C=C(O)C=C2C(C)(C)C)C(C)(C)C)C(C)=C(CC2=C(C=C(O)C=C2C(C)(C)C)C(C)(C)C)C(C)=C1CC1=C(C=C(O)C=C1C(C)(C)C)C(C)(C)C	CC1=C(CC2=C(C=C(O)C=C2C(C)(C)C)C(C)(C)C)C(C)=C(CC2=C(C=C(O)C=C2C(C)(C)C)C(C)(C)C)C(C)=C1CC1=C(C=C(O)C=C1C(C)(C)C)C(C)(C)C	TRUE	DTXCID307428	CC1=C(CC2=CC(=C(O)C(=C2)C(C)(C)C)C(C)(C)C)C(C)=C(CC2=CC(=C(O)C(=C2)C(C)(C)C)C(C)(C)C)C(C)=C1CC1=CC(=C(O)C(=C1)C(C)(C)C)C(C)(C)C	FALSE	CC1=C(C(=C(C(=C1CC2=CC(=C(C(=C2)C(C)(C)C)O)C(C)(C)C)C)CC3=CC(=C(C(=C3)C(C)(C)C)O)C(C)(C)C)C)CC4=CC(=C(C(=C4)C(C)(C)C)O)C(C)(C)C	OK	inconsistent structure	InChI=1S/C54H78O3/c1-31-37(28-40-43(49(4,5)6)22-34(55)23-44(40)50(7,8)9)32(2)39(30-42-47(53(16,17)18)26-36(57)27-48(42)54(19,20)21)33(3)38(31)29-41-45(51(10,11)12)24-35(56)25-46(41)52(13,14)15/h22-27,55-57H,28-30H2,1-21H3	InChI=1S/C54H78O3/c1-31-37(22-34-25-40(49(4,5)6)46(55)41(26-34)50(7,8)9)32(2)39(24-36-29-44(53(16,17)18)48(57)45(30-36)54(19,20)21)33(3)38(31)23-35-27-42(51(10,11)12)47(56)43(28-35)52(13,14)15/h25-30,55-57H,22-24H2,1-21H3	InChI=1S/C54H78O3/c1-31-37(22-34-25-40(49(4,5)6)46(55)41(26-34)50(7,8)9)32(2)39(24-36-29-44(53(16,17)18)48(57)45(30-36)54(19,20)21)33(3)38(31)23-35-27-42(51(10,11)12)47(56)43(28-35)52(13,14)15/h25-30,55-57H,22-24H2,1-21H3	FALSE	FALSE
13591	100.005.455	1,4-diazabicyclooctane	-					205-999-9	280-57-9	no	organic	mono-constituent substance	FULL	≥ 1000 to < 10000 tonnes	C1CN2CCN1CC2		C1CCCC(CCC1)N1CCCCNCC1	C1CCCC(CCC1)N1CCCCNCC1	TRUE	DTXCID902016	C1CN2CCN1CC2	FALSE	C1CN2CCN1CC2	TRUE	inconsistent structure	InChI=1S/C14H28N2/c1-2-4-8-14(9-5-3-1)16-12-7-6-10-15-11-13-16/h14-15H,1-13H2	InChI=1S/C6H12N2/c1-2-8-5-3-7(1)4-6-8/h1-6H2	InChI=1S/C6H12N2/c1-2-8-5-3-7(1)4-6-8/h1-6H2	FALSE	FALSE
4141	100.103.179	Phosphoramidic acid 1,4-piperazinediylbistetrakis(2,6-dimethylphenyl)ester	-					433-550-9	382138-32-1	no	organic	mono-constituent substance	NONS	Tonnage data confidential	P(OC1=C(C)C=C(C)C=C1)(OC2=C(C)C=C(C)C=C2)(=O)N3CCN(P(OC4=C(C)C=C(C)C=C4)(OC5=C(C)C=C(C)C=C5)=O)CC3		CC1=CC=CC(C)=C1OP(=O)(OC1=C(C)C=CC=C1C)N1CCN(CC1)P(=O)(OC1=C(C)C=CC=C1C)OC1=C(C)C=CC=C1C	CC1=CC=CC(C)=C1OP(=O)(OC1=C(C)C=CC=C1C)N1CCN(CC1)P(=O)(OC1=C(C)C=CC=C1C)OC1=C(C)C=CC=C1C	TRUE						inconsistent structure	InChI=1S/C36H44N2O6P2/c1-25-13-9-14-26(2)33(25)41-45(39,42-34-27(3)15-10-16-28(34)4)37-21-23-38(24-22-37)46(40,43-35-29(5)17-11-18-30(35)6)44-36-31(7)19-12-20-32(36)8/h9-20H,21-24H2,1-8H3					P(OC1=C(C)C=C(C)C=C1)(OC2=C(C)C=C(C)C=C2)(=O)N3CCN(P(OC4=C(C)C=C(C)C=C4)(OC5=C(C)C=C(C)C=C5)=O)CC3	InChI=1S/C36H44N2O6P2/c1-25-9-13-33(29(5)21-25)41-45(39,42-34-14-10-26(2)22-30(34)6)37-17-19-38(20-18-37)46(40,43-35-15-11-27(3)23-31(35)7)44-36-16-12-28(4)24-32(36)8/h9-16,21-24H,17-20H2,1-8H3	FALSE
27245	100.052.497	2-[(3-aziridin-1-ylpropionyl)methyl]-2-ethylpropane-1,3-diyl bis(aziridine-1-propionate)	-					257-765-0	52234-82-9	no	organic	mono-constituent substance	FULL	Cease manufacture	CCC(COC(=O)CCN1CC1)(COC(=O)CCN1CC1)COC(=O)CCN1CC1		CCC(COC(=O)CCN1CC1)(COC(=O)CCN1CC1)CC(=O)CCN1CC1	CCC(COC(=O)CCN1CC1)(COC(=O)CCN1CC1)CC(=O)CCN1CC1	TRUE	DTXCID701333540	CCC(COC(=O)CCN1CC1)(COC(=O)CCN1CC1)COC(=O)CCN1CC1	FALSE	CCC(COC(=O)CCN1CC1)(COC(=O)CCN2CC2)COC(=O)CCN3CC3	OK	inconsistent structure	InChI=1S/C21H35N3O5/c1-2-21(15-18(25)3-6-22-9-10-22,16-28-19(26)4-7-23-11-12-23)17-29-20(27)5-8-24-13-14-24/h2-17H2,1H3	InChI=1S/C21H35N3O6/c1-2-21(15-28-18(25)3-6-22-9-10-22,16-29-19(26)4-7-23-11-12-23)17-30-20(27)5-8-24-13-14-24/h2-17H2,1H3	InChI=1S/C21H35N3O6/c1-2-21(15-28-18(25)3-6-22-9-10-22,16-29-19(26)4-7-23-11-12-23)17-30-20(27)5-8-24-13-14-24/h2-17H2,1H3	FALSE	FALSE
2755	100.101.622	2-hydroxy-3-(2-ethyl-4-methylimidazoyl)propylneodecanoate	-					417-350-9	776326-15-9	no	organic	mono-constituent substance	NONS	Tonnage data confidential	C(C(OCC(CC(=O)N1C(CC)=NC(C)=C1)O)=O)(CCC)(CCC)CC		CCCC(CC)(CCC)C(=O)OCC(O)CN1C=C(C)N=C1CC	CCCC(CC)(CCC)C(=O)OCC(O)CN1C=C(C)N=C1CC	TRUE						inconsistent structure	InChI=1S/C19H34N2O3/c1-6-10-19(9-4,11-7-2)18(23)24-14-16(22)13-21-12-15(5)20-17(21)8-3/h12,16,22H,6-11,13-14H2,1-5H3					C(C(OCC(CC(=O)N1C(CC)=NC(C)=C1)O)=O)(CCC)(CCC)CC	InChI=1S/C20H34N2O4/c1-6-10-20(9-4,11-7-2)19(25)26-14-16(23)12-18(24)22-13-15(5)21-17(22)8-3/h13,16,23H,6-12,14H2,1-5H3	FALSE
4694	100.102.119	2-Propenoic acid, 1,1'-[(4,4-dimethyl-2,5-dioxo-1,3-imidazolidinediyl)bis[(2-hydroxy-3,1-propanediyl)oxy[2,2-bis[[(1-oxo-2-propen-1-yl)oxy]methyl]-3,1-propanediyl]]] ester	-					422-620-4	79794-60-8	no	organic	mono-constituent substance	NONS	Tonnage data confidential	C(COC(C=C)=O)(COC(C=C)=O)(COC(C=C)=O)COCC(CN1C(C)(C)C(=O)N(CC(COCC(COC(C=C)=O)(COC(C=C)=O)COC(C=C)=O)O)C1=O)O		CCC1(C)N(CC(O)COCC(COC(=O)C=C)(COC(=O)C=C)COC(=O)C=C)C(=O)N(CC(O)COCC(COC(=O)C=C)(COC(=O)C=C)COC(=O)C=C)C1=O	CCC1(C)N(CC(O)COCC(COC(=O)C=C)(COC(=O)C=C)COC(=O)C=C)C(=O)N(CC(O)COCC(COC(=O)C=C)(COC(=O)C=C)COC(=O)C=C)C1=O	TRUE						inconsistent structure	InChI=1S/C40H54N2O18/c1-9-30(45)55-22-39(23-56-31(46)10-2,24-57-32(47)11-3)20-53-18-28(43)16-41-36(51)38(8,15-7)42(37(41)52)17-29(44)19-54-21-40(25-58-33(48)12-4,26-59-34(49)13-5)27-60-35(50)14-6/h9-14,28-29,43-44H,1-6,15-27H2,7-8H3					C(COC(C=C)=O)(COC(C=C)=O)(COC(C=C)=O)COCC(CN1C(C)(C)C(=O)N(CC(COCC(COC(C=C)=O)(COC(C=C)=O)COC(C=C)=O)O)C1=O)O	InChI=1S/C39H52N2O18/c1-9-29(44)54-21-38(22-55-30(45)10-2,23-56-31(46)11-3)19-52-17-27(42)15-40-35(50)37(7,8)41(36(40)51)16-28(43)18-53-20-39(24-57-32(47)12-4,25-58-33(48)13-5)26-59-34(49)14-6/h9-14,27-28,42-43H,1-6,15-26H2,7-8H3	FALSE
8196	100.105.533	Nonylphenol, ethoxylated	-					500-024-6	9016-45-9	no	organic	mono-constituent substance	FULL	Cease manufacture	[H]OCCO*.CCCCCCCCCC1=CC=CC=C1 |c:16,18,t:14,lp:1:2,4:2,m:5:19.20.18,Sg:n:1,2,3::ht|		CCC(C)CC1=CC=C(OCCO)C=C1	CCC(C)CC1=CC=C(OCCO)C=C1	TRUE	DTXCID601326821	[H]OCCO*.CCCCCCCCCC1=CC=CC=C1 |c:16,18,t:14,lp:1:2,4:2,m:5:19.20.18,Sg:n:1,2,3::ht|	FALSE	CCCCCCCCCC1=CC=C(C=C1)OCCOCCO	FALSE	inconsistent structure	InChI=1S/C13H20O2/c1-3-11(2)10-12-4-6-13(7-5-12)15-9-8-14/h4-7,11,14H,3,8-10H2,1-2H3		InChI=1S/C19H32O3/c1-2-3-4-5-6-7-8-9-18-10-12-19(13-11-18)22-17-16-21-15-14-20/h10-13,20H,2-9,14-17H2,1H3	FALSE	FALSE
9929	100.102.424	tert-butyl (4R)-cis-6-cyanomethyl-2,2-dimethyl-1,3-dioxane-4-acetate	-					425-780-3	125971-94-0	no	organic	mono-constituent substance	NONS	Tonnage data confidential	CC(C)(C)OC(=O)C[C@H]1C[C@@H](CC#N)OC(C)(C)O1		CCCCOC(=O)C[C@H]1C[C@@H](CC#N)OC(C)(C)O1	CCCCOC(=O)C[C@H]1C[C@@H](CC#N)OC(C)(C)O1	TRUE	DTXCID90321231	CC(C)(C)OC(=O)C[C@H]1C[C@@H](CC#N)OC(C)(C)O1	FALSE	CC1(O[C@@H](C[C@@H](O1)CC(=O)OC(C)(C)C)CC#N)C	OK	inconsistent structure	InChI=1S/C14H23NO4/c1-4-5-8-17-13(16)10-12-9-11(6-7-15)18-14(2,3)19-12/h11-12H,4-6,8-10H2,1-3H3/t11-,12-/m1/s1	InChI=1S/C14H23NO4/c1-13(2,3)19-12(16)9-11-8-10(6-7-15)17-14(4,5)18-11/h10-11H,6,8-9H2,1-5H3/t10-,11-/m1/s1	InChI=1S/C14H23NO4/c1-13(2,3)19-12(16)9-11-8-10(6-7-15)17-14(4,5)18-11/h10-11H,6,8-9H2,1-5H3/t10-,11-/m1/s1	FALSE	FALSE
12996	100.103.711	L-Tryptophan, 1-[(1,1-dimethylethoxy)carbonyl]-N-[(9H-fluoren-9-ylmethoxy)carbonyl]-, phenylmethyl ester	-					440-830-4	1170938-31-4	no	organic	mono-constituent substance	NONS	Tonnage data confidential	C(OC(N[C@@H](CC=1C=2C(N(C(OC(C)(C)C)=O)C1)=CC=CC2)C(OCC3=CC=CC=C3)=O)=O)C4C=5C(C=6C4=CC=CC6)=CC=CC5		CC(C)(C)OC(=O)N1C=C(C[C@H](NC(=O)OCC2C3=CC=CC=C3C3=C2C=CC=C3)C(O)=O)C2=C1C=CC=C2	CC(C)(C)OC(=O)N1C=C(C[C@H](NC(=O)OCC2C3=CC=CC=C3C3=C2C=CC=C3)C(O)=O)C2=C1C=CC=C2	TRUE						inconsistent structure	InChI=1S/C31H30N2O6/c1-31(2,3)39-30(37)33-17-19(20-10-8-9-15-27(20)33)16-26(28(34)35)32-29(36)38-18-25-23-13-6-4-11-21(23)22-12-5-7-14-24(22)25/h4-15,17,25-26H,16,18H2,1-3H3,(H,32,36)(H,34,35)/t26-/m0/s1					C(OC(N[C@@H](CC=1C=2C(N(C(OC(C)(C)C)=O)C1)=CC=CC2)C(OCC3=CC=CC=C3)=O)=O)C4C=5C(C=6C4=CC=CC6)=CC=CC5	InChI=1S/C38H36N2O6/c1-38(2,3)46-37(43)40-22-26(27-15-11-12-20-34(27)40)21-33(35(41)44-23-25-13-5-4-6-14-25)39-36(42)45-24-32-30-18-9-7-16-28(30)29-17-8-10-19-31(29)32/h4-20,22,32-33H,21,23-24H2,1-3H3,(H,39,42)/t33-/m0/s1	FALSE
4914	100.103.920	dimethyl-1-{[2-methoxy-5-(2-methyl-butoxycarbonyl)phenylcarbamoyl]-[2-octadecyl-1,1-dioxo-1,2,4-benzothiadiazin-3-yl]methyl} imidazole-4,5-dicarboxylate	-					443-910-7	1380163-91-6	no	organic	mono-constituent substance	NONS	Cease manufacture	C(NC(=O)C1=C(OC)C=CC(C(OCC(CC)C)=O)=C1)(C=2N(CCCCCCCCCCCCCCCCCC)S(=O)(=O)C=3C(N2)=CC=CC3)N4C(C(OC)=O)=C(C(OC)=O)N=C4		CCCCCCCCCCCCCCCCCCN1C(=NC2=CC=CC=C2S1(=O)=O)C(N1C=NC(C(=O)OC)=C1C(=O)OC)C(=O)NC1=CC(=CC=C1OC)C(=O)OCC(C)CC	CCCCCCCCCCCCCCCCCCN1C(=NC2=CC=CC=C2S1(=O)=O)C(N1C=NC(C(=O)OC)=C1C(=O)OC)C(=O)NC1=CC(=CC=C1OC)C(=O)OCC(C)CC	TRUE						inconsistent structure	InChI=1S/C47H67N5O10S/c1-7-9-10-11-12-13-14-15-16-17-18-19-20-21-22-25-30-52-43(49-36-26-23-24-27-39(36)63(52,57)58)42(51-33-48-40(46(55)60-5)41(51)47(56)61-6)44(53)50-37-31-35(28-29-38(37)59-4)45(54)62-32-34(3)8-2/h23-24,26-29,31,33-34,42H,7-22,25,30,32H2,1-6H3,(H,50,53)					C(NC(=O)C1=C(OC)C=CC(C(OCC(CC)C)=O)=C1)(C=2N(CCCCCCCCCCCCCCCCCC)S(=O)(=O)C=3C(N2)=CC=CC3)N4C(C(OC)=O)=C(C(OC)=O)N=C4	InChI=1S/C47H67N5O10S/c1-7-9-10-11-12-13-14-15-16-17-18-19-20-21-22-25-30-52-43(49-37-26-23-24-27-39(37)63(52,57)58)42(51-33-48-40(46(55)60-5)41(51)47(56)61-6)50-44(53)36-31-35(28-29-38(36)59-4)45(54)62-32-34(3)8-2/h23-24,26-29,31,33-34,42H,7-22,25,30,32H2,1-6H3,(H,50,53)	FALSE
9746	100.103.926	2-(5,5-dimethyl-2,4-dioxooxazolidin-3-yl)-4,4-dimethyl-3-oxo-N-(2-methoxy-5-octadecanoylaminophenyl)pentanoic acid amide	-					443-980-9	221215-20-9	no	organic	mono-constituent substance	NONS	Tonnage data confidential	O=C1NC(C(=O)N1C(C(=O)NC2=CC(=CC=C2OC)NC(=O)CCCCCCCCCCCCCCCCC)C(=O)C(C)(C)C)(C)C		CCCCCCCCCCCCCCCCCC(=O)NC1=CC(NC(=O)C(N2C(=O)OC(C)(C)C2=O)C(=O)C(C)(C)C)=C(OC)C=C1	CCCCCCCCCCCCCCCCCC(=O)NC1=CC(NC(=O)C(N2C(=O)OC(C)(C)C2=O)C(=O)C(C)(C)C)=C(OC)C=C1	TRUE						inconsistent structure	InChI=1S/C37H59N3O7/c1-8-9-10-11-12-13-14-15-16-17-18-19-20-21-22-23-30(41)38-27-24-25-29(46-7)28(26-27)39-33(43)31(32(42)36(2,3)4)40-34(44)37(5,6)47-35(40)45/h24-26,31H,8-23H2,1-7H3,(H,38,41)(H,39,43)					O=C1NC(C(=O)N1C(C(=O)NC2=CC(=CC=C2OC)NC(=O)CCCCCCCCCCCCCCCCC)C(=O)C(C)(C)C)(C)C	InChI=1S/C37H60N4O6/c1-8-9-10-11-12-13-14-15-16-17-18-19-20-21-22-23-30(42)38-27-24-25-29(47-7)28(26-27)39-33(44)31(32(43)36(2,3)4)41-34(45)37(5,6)40-35(41)46/h24-26,31H,8-23H2,1-7H3,(H,38,42)(H,39,44)(H,40,46)	FALSE
4246	100.101.890	1,6-bis(3,3-bis((1-methylpentylidenimino)propyl)ureido)hexane	-					420-190-2	771478-66-1	no	organic	mono-constituent substance	NONS	Cease manufacture	O=C(NCCCN=C(C)CCCC)NCCCCCCNC(=O)NCCCN=C(C)CCCC		CC(=NCCCN(CCCN=C(C)C(C)(C)C)C(=O)NCCCCCCNC(=O)N(CCCN=C(C)C(C)(C)C)CCCN=C(C)C(C)(C)C)C(C)(C)C	CC(=NCCCN(CCCN=C(C)C(C)(C)C)C(=O)NCCCCCCNC(=O)N(CCCN=C(C)C(C)(C)C)CCCN=C(C)C(C)(C)C)C(C)(C)C	TRUE						inconsistent structure	InChI=1S/C44H86N8O2/c1-35(41(5,6)7)45-27-21-31-51(32-22-28-46-36(2)42(8,9)10)39(53)49-25-19-17-18-20-26-50-40(54)52(33-23-29-47-37(3)43(11,12)13)34-24-30-48-38(4)44(14,15)16/h17-34H2,1-16H3,(H,49,53)(H,50,54)					O=C(NCCCN=C(C)CCCC)NCCCCCCNC(=O)NCCCN=C(C)CCCC	InChI=1S/C26H52N6O2/c1-5-7-15-23(3)27-19-13-21-31-25(33)29-17-11-9-10-12-18-30-26(34)32-22-14-20-28-24(4)16-8-6-2/h5-22H2,1-4H3,(H2,29,31,33)(H2,30,32,34)	FALSE
9455	100.101.474	3-(cis-1-propenyl)-7-amino-8-oxo-5-thia-1-azabicyclo[4.2.0]oct-2-ene-2-carboxylic acid	C\C=C/C1=C(N2C(SC1)C(N)C2=O)C(O)=O	InChI=1S/C10H12N2O3S/c1-2-3-5-4-16-9-6(11)8(13)12(9)7(5)10(14)15/h2-3,6,9H,4,11H2,1H3,(H,14,15)/b3-2-	FALSE	TRUE		415-750-8	106447-44-3	no	organic	mono-constituent substance	NONS	Tonnage data confidential	C/C=C\C1=C(N2[C@@H]([C@@H](C2=O)N)SC1)C(=O)O	InChI=1S/C10H12N2O3S/c1-2-3-5-4-16-9-6(11)8(13)12(9)7(5)10(14)15/h2-3,6,9H,4,11H2,1H3,(H,14,15)/b3-2-/t6-,9-/m1/s1	CC=CC1=C(N2C(CS1)C(N)C2=O)C(O)=O	CC=CC1=C(N2C(CS1)C(N)C2=O)C(O)=O	TRUE	DTXCID801339060	[H][C@@]1(N)C(=O)N2C(C(O)=O)=C(CS[C@]12[H])C=CC	FALSE	C/C=C\C1=C(N2[C@@H]([C@@H](C2=O)N)SC1)C(=O)O	OK	inconsistent structure	InChI=1S/C10H12N2O3S/c1-2-3-6-8(10(14)15)12-5(4-16-6)7(11)9(12)13/h2-3,5,7H,4,11H2,1H3,(H,14,15)	InChI=1S/C10H12N2O3S/c1-2-3-5-4-16-9-6(11)8(13)12(9)7(5)10(14)15/h2-3,6,9H,4,11H2,1H3,(H,14,15)/t6-,9-/m1/s1	InChI=1S/C10H12N2O3S/c1-2-3-5-4-16-9-6(11)8(13)12(9)7(5)10(14)15/h2-3,6,9H,4,11H2,1H3,(H,14,15)/b3-2-/t6-,9-/m1/s1	FALSE	FALSE
5005	100.100.451	(+/-)-2,3-dihydro-2-hydroxy-3,3-dimethylbenzofuran-5-ylethanesulfonate	CC1(C)C(O)OC2=CC=C(CCS([O-])(=O)=O)C=C12	InChI=1S/C12H16O5S/c1-12(2)9-7-8(5-6-18(14,15)16)3-4-10(9)17-11(12)13/h3-4,7,11,13H,5-6H2,1-2H3,(H,14,15,16)/p-1	FALSE	FALSE	inconsistent structure	402-720-4	134144-37-9	no	organic	mono-constituent substance	NONS	Tonnage data confidential	CC1(C)C=2C(OC1O)=CC=C(OS(CCC3=CC=CC=C3)(=O)=O)C2	InChI=1S/C18H20O5S/c1-18(2)15-12-14(8-9-16(15)22-17(18)19)23-24(20,21)11-10-13-6-4-3-5-7-13/h3-9,12,17,19H,10-11H2,1-2H3	CCS(=O)(=O)OC1=CC=C2OC(O)C(C)(C)C2=C1	CCS(=O)(=O)OC1=CC=C2OC(O)C(C)(C)C2=C1	TRUE						inconsistent structure	InChI=1S/C12H16O5S/c1-4-18(14,15)17-8-5-6-10-9(7-8)12(2,3)11(13)16-10/h5-7,11,13H,4H2,1-3H3					CC1(C)C=2C(OC1O)=CC=C(OS(CCC3=CC=CC=C3)(=O)=O)C2	InChI=1S/C18H20O5S/c1-18(2)15-12-14(8-9-16(15)22-17(18)19)23-24(20,21)11-10-13-6-4-3-5-7-13/h3-9,12,17,19H,10-11H2,1-2H3	FALSE
22037	100.032.225	2-[[4-[bis(2-hydroxyethyl)amino]-o-tolyl]azo]-5-nitrobenzonitrile	CC1=C(C=CC(=C1)N(CCO)CCO)N=NC1=C(C=C(C=C1)[N+]([O-])=O)C#N	InChI=1S/C18H19N5O4/c1-13-10-15(22(6-8-24)7-9-25)2-4-17(13)20-21-18-5-3-16(23(26)27)11-14(18)12-19/h2-5,10-11,24-25H,6-9H2,1H3	FALSE	TRUE		235-460-3	12236-25-8	no	organic	mono-constituent substance	FULL	≥ 1 to < 10 tonnes	CC(=O)OCCN(CCOC(C)=O)C1=CC=C(N=NC2=C(C=C(C=C2)[N+]([O-])=O)C#N)C(C)=C1	InChI=1S/C22H23N5O6/c1-15-12-19(26(8-10-32-16(2)28)9-11-33-17(3)29)4-6-21(15)24-25-22-7-5-20(27(30)31)13-18(22)14-23/h4-7,12-13H,8-11H2,1-3H3	CC1=C(C=CC(=C1)N(CCO)CCO)\N=N\C1=C(C=C(C=C1)[N+]([O-])=O)C#N	CC1=C(C=CC(=C1)N(CCO)CCO)\N=N\C1=C(C=C(C=C1)[N+]([O-])=O)C#N	TRUE	DTXCID7044849	CC(=O)OCCN(CCOC(C)=O)C1=CC=C(N=NC2=C(C=C(C=C2)[N+]([O-])=O)C#N)C(C)=C1	FALSE	CC1=C(C=CC(=C1)N(CCO)CCO)N=NC2=C(C=C(C=C2)[N+](=O)[O-])C#N	FALSE	inconsistent structure	InChI=1S/C18H19N5O4/c1-13-10-15(22(6-8-24)7-9-25)2-4-17(13)20-21-18-5-3-16(23(26)27)11-14(18)12-19/h2-5,10-11,24-25H,6-9H2,1H3/b21-20+	InChI=1S/C22H23N5O6/c1-15-12-19(26(8-10-32-16(2)28)9-11-33-17(3)29)4-6-21(15)24-25-22-7-5-20(27(30)31)13-18(22)14-23/h4-7,12-13H,8-11H2,1-3H3	InChI=1S/C18H19N5O4/c1-13-10-15(22(6-8-24)7-9-25)2-4-17(13)20-21-18-5-3-16(23(26)27)11-14(18)12-19/h2-5,10-11,24-25H,6-9H2,1H3	FALSE	FALSE
3522	100.103.718	Ergoline, 8-[(methylthio)methyl]-6-propyl-, (8.beta.)-	CCCN1CC(CSC)C[C@H]2[C@H]1CC1=CNC3=CC=CC2=C13	InChI=1S/C19H26N2S/c1-3-7-21-11-13(12-22-2)8-16-15-5-4-6-17-19(15)14(10-20-17)9-18(16)21/h4-6,10,13,16,18,20H,3,7-9,11-12H2,1-2H3/t13?,16-,18-/m1/s1	FALSE	FALSE	deviating stereochemistry	440-900-4	66104-22-1	no	organic	mono-constituent substance	NONS	Tonnage data confidential	C(CC)N1[C@]2([C@@](C=3C=4C(C2)=CNC4C=CC3)(C[C@@H](CSC)C1)[H])[H]	InChI=1S/C19H26N2S/c1-3-7-21-11-13(12-22-2)8-16-15-5-4-6-17-19(15)14(10-20-17)9-18(16)21/h4-6,10,13,16,18,20H,3,7-9,11-12H2,1-2H3/t13-,16-,18-/m1/s1	[H][C@@]12CC3=CNC4=C3C(=CC=C4)[C@@]1([H])C[C@@H](CSC)CN2C(=O)CC	[H][C@@]12CC3=CNC4=C3C(=CC=C4)[C@@]1([H])C[C@@H](CSC)CN2C(=O)CC	TRUE	DTXCID203438	CCCN1C[C@H](CSC)C[C@H]2[C@H]1CC1=CNC3=CC=CC2=C13	FALSE	CCCN1C[C@@H](C[C@H]2[C@H]1CC3=CNC4=CC=CC2=C34)CSC	FALSE	inconsistent structure	InChI=1S/C19H24N2OS/c1-3-18(22)21-10-12(11-23-2)7-15-14-5-4-6-16-19(14)13(9-20-16)8-17(15)21/h4-6,9,12,15,17,20H,3,7-8,10-11H2,1-2H3/t12-,15-,17-/m1/s1	InChI=1S/C19H26N2S/c1-3-7-21-11-13(12-22-2)8-16-15-5-4-6-17-19(15)14(10-20-17)9-18(16)21/h4-6,10,13,16,18,20H,3,7-9,11-12H2,1-2H3/t13-,16-,18-/m1/s1	InChI=1S/C19H26N2S/c1-3-7-21-11-13(12-22-2)8-16-15-5-4-6-17-19(15)14(10-20-17)9-18(16)21/h4-6,10,13,16,18,20H,3,7-9,11-12H2,1-2H3/t13-,16-,18-/m1/s1	FALSE	FALSE	C(CC)N1[C@]2([C@@](C=3C=4C(C2)=CNC4C=CC3)(C[C@@H](CSC)C1)[H])[H]
20665	100.019.833	3-(1-(4-amino-3-methyl-5-sulphonatophenyl)-1-(4-amino-3-sulphonatophenyl)methylene)cyclohexa-1,4-dienesulphonic acid	CC1=C(N)C(=CC(=C1)C(C1=CC(=C(N)C=C1)S([O-])(=O)=O)=C1C=CCC(=C1)S(O)(=O)=O)S([O-])(=O)=O	InChI=1S/C20H20N2O9S3/c1-11-7-14(10-18(20(11)22)34(29,30)31)19(12-3-2-4-15(8-12)32(23,24)25)13-5-6-16(21)17(9-13)33(26,27)28/h2-3,5-10H,4,21-22H2,1H3,(H,23,24,25)(H,26,27,28)(H,29,30,31)/p-2	FALSE	FALSE	inconsistent structure	221-816-5	3244-88-0	no	organic	mono-constituent substance	FULL	≥ 1 to < 10 tonnes	CC1=C/C(=C(\C2=CC(=C(C=C2)N)S(=O)(=O)O)/C3=CC(=C(C=C3)N)S(=O)(=O)[O-])/C=C(C1=N)S(=O)(=O)[O-].[Na+].[Na+]	InChI=1S/C20H19N3O9S3.2Na/c1-10-6-13(9-18(20(10)23)35(30,31)32)19(11-2-4-14(21)16(7-11)33(24,25)26)12-3-5-15(22)17(8-12)34(27,28)29;;/h2-9,23H,21-22H2,1H3,(H,24,25,26)(H,27,28,29)(H,30,31,32);;/q;2*+1/p-2	CC1=CC(=CC(=C1N)S(O)(=O)=O)C(\C1=CC=C(N)C(=C1)S(O)(=O)=O)=C1/C=CCC(=C1)S(O)(=O)=O	CC1=CC(=CC(=C1N)S(O)(=O)=O)C(\C1=CC=C(N)C(=C1)S(O)(=O)=O)=C1/C=CCC(=C1)S(O)(=O)=O	TRUE	DTXCID801515002	[Na+].[Na+].CC1=C(N)C(=CC(=C1)C(C1=CC=C(N)C(=C1)S([O-])(=O)=O)=C1C=CC(=N)C(=C1)S(O)(=O)=O)S([O-])(=O)=O	FALSE	CC1=C/C(=C(\C2=CC(=C(C=C2)N)S(=O)(=O)O)/C3=CC(=C(C=C3)N)S(=O)(=O)[O-])/C=C(C1=N)S(=O)(=O)[O-].[Na+].[Na+]	OK	inconsistent structure	InChI=1S/C20H20N2O9S3/c1-11-7-14(10-18(20(11)22)34(29,30)31)19(12-3-2-4-15(8-12)32(23,24)25)13-5-6-16(21)17(9-13)33(26,27)28/h2-3,5-10H,4,21-22H2,1H3,(H,23,24,25)(H,26,27,28)(H,29,30,31)/b19-12+	InChI=1S/C20H19N3O9S3.2Na/c1-10-6-13(9-18(20(10)23)35(30,31)32)19(11-2-4-14(21)16(7-11)33(24,25)26)12-3-5-15(22)17(8-12)34(27,28)29;;/h2-9,21H,22-23H2,1H3,(H,24,25,26)(H,27,28,29)(H,30,31,32);;/q;2*+1/p-2	InChI=1S/C20H19N3O9S3.2Na/c1-10-6-13(9-18(20(10)23)35(30,31)32)19(11-2-4-14(21)16(7-11)33(24,25)26)12-3-5-15(22)17(8-12)34(27,28)29;;/h2-9,23H,21-22H2,1H3,(H,24,25,26)(H,27,28,29)(H,30,31,32);;/q;2*+1/p-2	FALSE	FALSE
21713	100.017.818	16,23-dihydronaphth[2',3':6,7]indolo[2,3-c]dinaphtho[2,3-a:2'3'-i]carbazole-5,10,15,17,22,24-hexone	O=C1CC2=C(C=C1)C=C1C3=NC4=C(C=CC5=C4C(=O)C4=C(C6=C7C=CC8=CC9=CC(=O)C=CC9=CC8=C7N=C6C(=O)C4)C5=O)C3=CC=C1C2=O	InChI=1S/C42H18N2O6/c45-21-4-1-17-13-28-18(11-20(17)12-21)3-6-26-33-34-31(16-32(47)39(33)44-37(26)28)42(50)35-27(41(34)49)10-8-24-23-7-9-25-30(36(23)43-38(24)35)14-19-2-5-22(46)15-29(19)40(25)48/h1-14H,15-16H2	FALSE	FALSE	inconsistent structure	219-599-7	2475-33-4	no	organic	mono-constituent substance	FULL	≥ 10 to < 100 tonnes	O=C1C2=CC=CC=C2C(=O)C2=C3NC4=C5C(=O)C6=CC=CC=C6C(=O)C5=C5NC6=C7C(=O)C8=C(C=CC=C8)C(=O)C7=CC=C6C5=C4C3=CC=C12	InChI=1S/C42H18N2O6/c45-37-17-7-1-3-9-19(17)39(47)29-25(37)15-13-23-27-28-24-14-16-26-30(40(48)20-10-4-2-8-18(20)38(26)46)34(24)44-36(28)32-31(35(27)43-33(23)29)41(49)21-11-5-6-12-22(21)42(32)50/h1-16,43-44H	O=C1CC2=C(C3=C1C1=C(N3)C3=C(C4=NC5=C6C=C7C=CC(=O)C=C7C=C6C=CC5=C14)C(=O)C1=C(C=CC=C1)C3=O)C(=O)C1=C(C=CC=C1)C2=O	O=C1CC2=C(C3=C1C1=C(N3)C3=C(C4=NC5=C6C=C7C=CC(=O)C=C7C=C6C=CC5=C14)C(=O)C1=C(C=CC=C1)C3=O)C(=O)C1=C(C=CC=C1)C2=O	TRUE	DTXCID606283	O=C1C2=CC=CC=C2C(=O)C2=C3NC4=C5C(=O)C6=CC=CC=C6C(=O)C5=C5NC6=C7C(=O)C8=C(C=CC=C8)C(=O)C7=CC=C6C5=C4C3=CC=C12	FALSE	C1=CC=C2C(=C1)C(=O)C3=C(C2=O)C4=C(C=C3)C5=C6C7=C(C8=C(C=C7)C(=O)C9=CC=CC=C9C8=O)NC6=C1C(=C5N4)C(=O)C2=CC=CC=C2C1=O	OK	inconsistent structure	InChI=1S/C42H18N2O6/c45-20-11-9-17-15-26-18(13-19(17)14-20)10-12-25-29-32-31-28(46)16-27-30(40(48)22-6-2-1-5-21(22)39(27)47)37(31)44-38(32)34-33(36(29)43-35(25)26)41(49)23-7-3-4-8-24(23)42(34)50/h1-15,44H,16H2	InChI=1S/C42H18N2O6/c45-37-17-7-1-3-9-19(17)39(47)29-25(37)15-13-23-27-28-24-14-16-26-30(40(48)20-10-4-2-8-18(20)38(26)46)34(24)44-36(28)32-31(35(27)43-33(23)29)41(49)21-11-5-6-12-22(21)42(32)50/h1-16,43-44H	InChI=1S/C42H18N2O6/c45-37-17-7-1-3-9-19(17)39(47)29-25(37)15-13-23-27-28-24-14-16-26-30(40(48)20-10-4-2-8-18(20)38(26)46)34(24)44-36(28)32-31(35(27)43-33(23)29)41(49)21-11-5-6-12-22(21)42(32)50/h1-16,43-44H	FALSE	FALSE
3423	100.102.818	Acetic acid, ethenyl ester, polymer with ethene	C=C.OC(=O)CC=C	InChI=1S/C4H6O2.C2H4/c1-2-3-4(5)6;1-2/h2H,1,3H2,(H,5,6);1-2H2	FALSE	FALSE	inconsistent structure	429-840-1	24937-78-8	no	organic	mono-constituent substance	NONS	Tonnage data confidential	CC(=O)OC=C.C=C	InChI=1S/C4H6O2.C2H4/c1-3-6-4(2)5;1-2/h3H,1H2,2H3;1-2H2	[H][C@@]1(CO[C@]2([H])[C@]([H])(CO[C@]12[H])OC(=O)C=C(C)N)OC(=O)C=C(C)N	[H][C@@]1(CO[C@]2([H])[C@]([H])(CO[C@]12[H])OC(=O)C=C(C)N)OC(=O)C=C(C)N	TRUE				CC(=O)OC=C.C=C	FALSE	inconsistent structure	InChI=1S/C14H20N2O6/c1-7(15)3-11(17)21-9-5-19-14-10(6-20-13(9)14)22-12(18)4-8(2)16/h3-4,9-10,13-14H,5-6,15-16H2,1-2H3/t9-,10-,13+,14+/m0/s1		InChI=1S/C4H6O2.C2H4/c1-3-6-4(2)5;1-2/h3H,1H2,2H3;1-2H2		FALSE
28089	100.016.962	(chloromethyl)diethoxymethylsilane	CCOC(OCC)[SiH2]CCl	InChI=1S/C6H15ClO2Si/c1-3-8-6(9-4-2)10-5-7/h6H,3-5,10H2,1-2H3	FALSE	FALSE	inconsistent structure	218-657-9	2212-10-4	no	organic	mono-constituent substance	FULL	≥ 1 to < 10 tonnes	CCO[Si](C)(CCl)OCC	InChI=1S/C6H15ClO2Si/c1-4-8-10(3,6-7)9-5-2/h4-6H2,1-3H3	CCOC([SiH3])(CCl)OCC	CCOC([SiH3])(CCl)OCC	TRUE		CCO[Si](C)(CCl)OCC	FALSE	CCO[Si](C)(CCl)OCC	FALSE	inconsistent structure	InChI=1S/C6H15ClO2Si/c1-3-8-6(10,5-7)9-4-2/h3-5H2,1-2,10H3	InChI=1S/C6H15ClO2Si/c1-4-8-10(3,6-7)9-5-2/h4-6H2,1-3H3	InChI=1S/C6H15ClO2Si/c1-4-8-10(3,6-7)9-5-2/h4-6H2,1-3H3	FALSE	FALSE
3384	100.100.633	Perfluoro(5,6,9,12-tetramethyl-4,7,10,13-tetraoxahexadecane)	FC(F)(F)C(F)(F)C(F)(F)OC(F)(C(F)(F)F)C(F)(F)OC(F)(C(F)(F)F)C(F)(F)OC(F)(C(F)(F)F)C(F)(OC(F)(F)C(F)(F)C(F)(F)F)C(F)(F)F	InChI=1S/C16F34O4/c17-1(18,7(25,26)27)13(43,44)51-3(21,9(31,32)33)4(22,10(34,35)36)52-15(47,48)6(24,12(40,41)42)54-16(49,50)5(23,11(37,38)39)53-14(45,46)2(19,20)8(28,29)30	FALSE	TRUE		404-730-4	148292-47-1	no	organic	mono-constituent substance	NONS	Cease manufacture	C(C(C(F)(F)F)(F)F)(OC(C(OC(C(OC(C(OC(C(C(F)(F)F)(F)F)(F)F)(C)F)(F)F)(C)F)(F)F)(C)F)(C)F)(F)F	InChI=1S/C16H12F22O4/c1-5(17,6(2,18)40-15(35,36)9(21,22)11(25,26)27)39-13(31,32)7(3,19)41-14(33,34)8(4,20)42-16(37,38)10(23,24)12(28,29)30/h1-4H3	FC(F)(F)C(F)(F)C(F)(F)OC(F)(C(F)(F)F)C(F)(F)OC(F)(C(F)(F)F)C(F)(F)OC(F)(C(F)(F)F)C(F)(OC(F)(F)C(F)(F)C(F)(F)F)C(F)(F)F	FC(F)(F)C(F)(F)C(F)(F)OC(F)(C(F)(F)F)C(F)(F)OC(F)(C(F)(F)F)C(F)(F)OC(F)(C(F)(F)F)C(F)(OC(F)(F)C(F)(F)C(F)(F)F)C(F)(F)F	TRUE						inconsistent structure	InChI=1S/C16F34O4/c17-1(18,7(25,26)27)13(43,44)51-3(21,9(31,32)33)4(22,10(34,35)36)52-15(47,48)6(24,12(40,41)42)54-16(49,50)5(23,11(37,38)39)53-14(45,46)2(19,20)8(28,29)30					C(C(C(F)(F)F)(F)F)(OC(C(OC(C(OC(C(OC(C(C(F)(F)F)(F)F)(F)F)(C)F)(F)F)(C)F)(F)F)(C)F)(C)F)(F)F	InChI=1S/C16H12F22O4/c1-5(17,6(2,18)40-15(35,36)9(21,22)11(25,26)27)39-13(31,32)7(3,19)41-14(33,34)8(4,20)42-16(37,38)10(23,24)12(28,29)30/h1-4H3	FALSE
3381	100.100.632	Perfluoro(5,8,9,12-tetramethyl-4,7,10,13-tetraoxahexadecane)	FC(F)(F)C(F)(F)C(F)(F)OC(F)(C(F)(F)F)C(F)(F)OC(F)(C(F)(F)F)C(F)(OC(F)(F)C(F)(OC(F)(F)C(F)(F)C(F)(F)F)C(F)(F)F)C(F)(F)F	InChI=1S/C16F34O4/c17-1(18,7(25,26)27)13(43,44)53-5(23,11(37,38)39)15(47,48)51-3(21,9(31,32)33)4(22,10(34,35)36)52-16(49,50)6(24,12(40,41)42)54-14(45,46)2(19,20)8(28,29)30	FALSE	TRUE		404-710-5	148292-43-7	no	organic	mono-constituent substance	NONS	Cease manufacture	C(C(C(F)(F)F)(F)F)(OC(C(OC(C(OC(C(OC(C(C(F)(F)F)(F)F)(F)F)(C)F)(F)F)(C)F)(C)F)(F)F)(C)F)(F)F	InChI=1S/C16H12F22O4/c1-5(17,39-13(31,32)7(3,19)41-15(35,36)9(21,22)11(25,26)27)6(2,18)40-14(33,34)8(4,20)42-16(37,38)10(23,24)12(28,29)30/h1-4H3	FC(F)(F)C(F)(F)C(F)(F)OC(F)(C(F)(F)F)C(F)(F)OC(F)(C(F)(F)F)C(F)(OC(F)(F)C(F)(OC(F)(F)C(F)(F)C(F)(F)F)C(F)(F)F)C(F)(F)F	FC(F)(F)C(F)(F)C(F)(F)OC(F)(C(F)(F)F)C(F)(F)OC(F)(C(F)(F)F)C(F)(OC(F)(F)C(F)(OC(F)(F)C(F)(F)C(F)(F)F)C(F)(F)F)C(F)(F)F	TRUE						inconsistent structure	InChI=1S/C16F34O4/c17-1(18,7(25,26)27)13(43,44)53-5(23,11(37,38)39)15(47,48)51-3(21,9(31,32)33)4(22,10(34,35)36)52-16(49,50)6(24,12(40,41)42)54-14(45,46)2(19,20)8(28,29)30					C(C(C(F)(F)F)(F)F)(OC(C(OC(C(OC(C(OC(C(C(F)(F)F)(F)F)(F)F)(C)F)(F)F)(C)F)(C)F)(F)F)(C)F)(F)F	InChI=1S/C16H12F22O4/c1-5(17,39-13(31,32)7(3,19)41-15(35,36)9(21,22)11(25,26)27)6(2,18)40-14(33,34)8(4,20)42-16(37,38)10(23,24)12(28,29)30/h1-4H3	FALSE
9946	100.101.575	N-[2-(3-acetyl-5-nitrothiophen-2-ylazo)-5-diethylaminophenyl]acetamide	CCN(CC)C1=CC(NC(C)=O)=C(C=C1)N=NC1=C(C=C(S1)[N+]([O-])=O)C(C)=O	InChI=1S/C18H21N5O4S/c1-5-22(6-2)13-7-8-15(16(9-13)19-12(4)25)20-21-18-14(11(3)24)10-17(28-18)23(26)27/h7-10H,5-6H2,1-4H3,(H,19,25)	FALSE	TRUE		416-860-9	777891-21-1	no	organic	mono-constituent substance	NONS	Tonnage data confidential	N(C(C)=O)C1=C(N(CC)CC)C=CC=C1N=NC2=C(C(C)=O)C=C(N(=O)=O)S2	InChI=1S/C18H21N5O4S/c1-5-22(6-2)15-9-7-8-14(17(15)19-12(4)25)20-21-18-13(11(3)24)10-16(28-18)23(26)27/h7-10H,5-6H2,1-4H3,(H,19,25)	CCN(CC)C1=CC=C(N=NC2=C(C=C(S2)N(=O)=O)C(C)=O)C(NC(C)=O)=C1	CCN(CC)C1=CC=C(N=NC2=C(C=C(S2)N(=O)=O)C(C)=O)C(NC(C)=O)=C1	TRUE						inconsistent structure	InChI=1S/C18H21N5O4S/c1-5-22(6-2)13-7-8-15(16(9-13)19-12(4)25)20-21-18-14(11(3)24)10-17(28-18)23(26)27/h7-10H,5-6H2,1-4H3,(H,19,25)					N(C(C)=O)C1=C(N(CC)CC)C=CC=C1N=NC2=C(C(C)=O)C=C(N(=O)=O)S2	InChI=1S/C18H21N5O4S/c1-5-22(6-2)15-9-7-8-14(17(15)19-12(4)25)20-21-18-13(11(3)24)10-16(28-18)23(26)27/h7-10H,5-6H2,1-4H3,(H,19,25)	FALSE
12478	100.015.565	4,4'-isopropylidenebis[2-allylphenol]	CCC(C1=CC(CC=C)=C(O)C=C1)C1=CC(CC=C)=C(O)C=C1	InChI=1S/C21H24O2/c1-4-7-17-13-15(9-11-20(17)22)19(6-3)16-10-12-21(23)18(14-16)8-5-2/h4-5,9-14,19,22-23H,1-2,6-8H2,3H3	FALSE	TRUE		217-121-1	1745-89-7	no	organic	mono-constituent substance	FULL	≥ 100 to < 1000 tonnes	CC(C)(C1=CC(CC=C)=C(O)C=C1)C1=CC=C(O)C(CC=C)=C1	InChI=1S/C21H24O2/c1-5-7-15-13-17(9-11-19(15)22)21(3,4)18-10-12-20(23)16(14-18)8-6-2/h5-6,9-14,22-23H,1-2,7-8H2,3-4H3	CCC(C1=CC(CC=C)=C(O)C=C1)C1=CC(CC=C)=C(O)C=C1	CCC(C1=CC(CC=C)=C(O)C=C1)C1=CC(CC=C)=C(O)C=C1	TRUE	DTXCID2035560	CC(C)(C1=CC(CC=C)=C(O)C=C1)C1=CC=C(O)C(CC=C)=C1	FALSE	CC(C)(C1=CC(=C(C=C1)O)CC=C)C2=CC(=C(C=C2)O)CC=C	OK	inconsistent structure	InChI=1S/C21H24O2/c1-4-7-17-13-15(9-11-20(17)22)19(6-3)16-10-12-21(23)18(14-16)8-5-2/h4-5,9-14,19,22-23H,1-2,6-8H2,3H3	InChI=1S/C21H24O2/c1-5-7-15-13-17(9-11-19(15)22)21(3,4)18-10-12-20(23)16(14-18)8-6-2/h5-6,9-14,22-23H,1-2,7-8H2,3-4H3	InChI=1S/C21H24O2/c1-5-7-15-13-17(9-11-19(15)22)21(3,4)18-10-12-20(23)16(14-18)8-6-2/h5-6,9-14,22-23H,1-2,7-8H2,3-4H3	FALSE	FALSE
10489	100.010.437	TCA	OC(=O)C(Cl)(Cl)Cl	InChI=1S/C2HCl3O2/c3-2(4,5)1(6)7/h(H,6,7)	FALSE	TRUE		211-479-2	650-51-1	no	organic	mono-constituent substance	FULL	≥ 100 to < 1000 tonnes	[Na+].[O-]C(=O)C(Cl)(Cl)Cl	InChI=1S/C2HCl3O2.Na/c3-2(4,5)1(6)7;/h(H,6,7);/q;+1/p-1	OC(=O)C(Cl)(Cl)Cl	OC(=O)C(Cl)(Cl)Cl	TRUE	DTXCID4014924	[Na+].[O-]C(=O)C(Cl)(Cl)Cl	FALSE	C(=O)(C(Cl)(Cl)Cl)[O-].[Na+]	FALSE	inconsistent structure	InChI=1S/C2HCl3O2/c3-2(4,5)1(6)7/h(H,6,7)	InChI=1S/C2HCl3O2.Na/c3-2(4,5)1(6)7;/h(H,6,7);/q;+1/p-1	InChI=1S/C2HCl3O2.Na/c3-2(4,5)1(6)7;/h(H,6,7);/q;+1/p-1	FALSE	FALSE
9193	100.102.944	3,4-dichloro-N-[5-chloro-4-[2-[4-dodecyloxyphenylsulfonyl]butyramido]-2-hydroxyphenyl]benzamide	CCCCCCCCCCCCOC1=CC=C(C=C1)S(=O)(=O)C(CC)C(=O)NC1=CC(O)=C(NC(=O)C2=CC(Cl)=C(Cl)C=C2)C=C1Cl	InChI=1S/C35H43Cl3N2O6S/c1-3-5-6-7-8-9-10-11-12-13-20-46-25-15-17-26(18-16-25)47(44,45)33(4-2)35(43)39-30-23-32(41)31(22-29(30)38)40-34(42)24-14-19-27(36)28(37)21-24/h14-19,21-23,33,41H,3-13,20H2,1-2H3,(H,39,43)(H,40,42)	FALSE	TRUE		431-130-1	327092-50-2	no	organic	mono-constituent substance	NONS	Tonnage data confidential	N(C(=O)C1=CC(Cl)=C(Cl)C=C1)C2=C(O)C=C(NC(CC(NS(=O)(=O)C3=CC=C(OCCCCCCCCCCCC)C=C3)C)=O)C(Cl)=C2	InChI=1S/C35H44Cl3N3O6S/c1-3-4-5-6-7-8-9-10-11-12-19-47-26-14-16-27(17-15-26)48(45,46)41-24(2)20-34(43)39-31-23-33(42)32(22-30(31)38)40-35(44)25-13-18-28(36)29(37)21-25/h13-18,21-24,41-42H,3-12,19-20H2,1-2H3,(H,39,43)(H,40,44)	CCCCCCCCCCCCOC1=CC=C(C=C1)S(=O)(=O)C(CC)C(=O)NC1=CC(O)=C(NC(=O)C2=CC(Cl)=C(Cl)C=C2)C=C1Cl	CCCCCCCCCCCCOC1=CC=C(C=C1)S(=O)(=O)C(CC)C(=O)NC1=CC(O)=C(NC(=O)C2=CC(Cl)=C(Cl)C=C2)C=C1Cl	TRUE						inconsistent structure	InChI=1S/C35H43Cl3N2O6S/c1-3-5-6-7-8-9-10-11-12-13-20-46-25-15-17-26(18-16-25)47(44,45)33(4-2)35(43)39-30-23-32(41)31(22-29(30)38)40-34(42)24-14-19-27(36)28(37)21-24/h14-19,21-23,33,41H,3-13,20H2,1-2H3,(H,39,43)(H,40,42)					N(C(=O)C1=CC(Cl)=C(Cl)C=C1)C2=C(O)C=C(NC(CC(NS(=O)(=O)C3=CC=C(OCCCCCCCCCCCC)C=C3)C)=O)C(Cl)=C2	InChI=1S/C35H44Cl3N3O6S/c1-3-4-5-6-7-8-9-10-11-12-19-47-26-14-16-27(17-15-26)48(45,46)41-24(2)20-34(43)39-31-23-33(42)32(22-30(31)38)40-35(44)25-13-18-28(36)29(37)21-25/h13-18,21-24,41-42H,3-12,19-20H2,1-2H3,(H,39,43)(H,40,44)	FALSE
26081	100.124.527	(6R,7R)-7-[((2Z)-2-[({2-[(1,1-dimethylethyl)oxy]-1,1-dimethyl-2-oxoethyl}oxy)imino]-2-{2-[(triphenylmethyl)amino]-1,3-thiazol-4-yl}acetyl)amino]-8-oxo-3-(1-pyridiniumylmethyl)-5-thia-1-azabicyclo[4.2.0]oct-2-ene-2-carboxylate	CC(C)(C)OC(=O)C(C)(C)O\N=C(/C(=O)N[C@H]1[C@H]2SCC(C[N+]3=CC=CC=C3)=C(N2C1=O)C([O-])=O)C1=CSC(NC(C2=CC=CC=C2)(C2=CC=CC=C2)C2=CC=CC=C2)=N1	InChI=1S/C45H44N6O7S2/c1-43(2,3)57-41(56)44(4,5)58-49-34(37(52)47-35-38(53)51-36(40(54)55)29(27-59-39(35)51)26-50-24-16-9-17-25-50)33-28-60-42(46-33)48-45(30-18-10-6-11-19-30,31-20-12-7-13-21-31)32-22-14-8-15-23-32/h6-25,28,35,39H,26-27H2,1-5H3,(H2-,46,47,48,52,54,55)/b49-34-/t35-,39-/m1/s1	FALSE	TRUE		617-560-2	84377-83-3	no	organic	mono-constituent substance	FULL	No longer valid	N(C=O)(C)C.C(NC1=NC(\C(\C(N[C@H]2[C@@]3(N(C2=O)C(C([O-])=O)=C(C[N+]=4C=CC=CC4)CS3)[H])=O)=N\OC(C(OC(C)(C)C)=O)(C)C)=CS1)(C5=CC=CC=C5)(C6=CC=CC=C6)C7=CC=CC=C7	InChI=1S/C45H44N6O7S2.C3H7NO/c1-43(2,3)57-41(56)44(4,5)58-49-34(37(52)47-35-38(53)51-36(40(54)55)29(27-59-39(35)51)26-50-24-16-9-17-25-50)33-28-60-42(46-33)48-45(30-18-10-6-11-19-30,31-20-12-7-13-21-31)32-22-14-8-15-23-32;1-4(2)3-5/h6-25,28,35,39H,26-27H2,1-5H3,(H2-,46,47,48,52,54,55);3H,1-2H3/b49-34-;/t35-,39-;/m1./s1	CC(C)(C)OC(=O)C(C)(C)O\N=C(/C(=O)N[C@H]1[C@H]2SCC(C[N+]3=CC=CC=C3)=C(N2C1=O)C([O-])=O)C1=CSC(NC(C2=CC=CC=C2)(C2=CC=CC=C2)C2=CC=CC=C2)=N1	CC(C)(C)OC(=O)C(C)(C)O\N=C(/C(=O)N[C@H]1[C@H]2SCC(C[N+]3=CC=CC=C3)=C(N2C1=O)C([O-])=O)C1=CSC(NC(C2=CC=CC=C2)(C2=CC=CC=C2)C2=CC=CC=C2)=N1	TRUE						inconsistent structure	InChI=1S/C45H44N6O7S2/c1-43(2,3)57-41(56)44(4,5)58-49-34(37(52)47-35-38(53)51-36(40(54)55)29(27-59-39(35)51)26-50-24-16-9-17-25-50)33-28-60-42(46-33)48-45(30-18-10-6-11-19-30,31-20-12-7-13-21-31)32-22-14-8-15-23-32/h6-25,28,35,39H,26-27H2,1-5H3,(H2-,46,47,48,52,54,55)/b49-34-/t35-,39-/m1/s1					N(C=O)(C)C.C(NC1=NC(\C(\C(N[C@H]2[C@@]3(N(C2=O)C(C([O-])=O)=C(C[N+]=4C=CC=CC4)CS3)[H])=O)=N\OC(C(OC(C)(C)C)=O)(C)C)=CS1)(C5=CC=CC=C5)(C6=CC=CC=C6)C7=CC=CC=C7	InChI=1S/C45H44N6O7S2.C3H7NO/c1-43(2,3)57-41(56)44(4,5)58-49-34(37(52)47-35-38(53)51-36(40(54)55)29(27-59-39(35)51)26-50-24-16-9-17-25-50)33-28-60-42(46-33)48-45(30-18-10-6-11-19-30,31-20-12-7-13-21-31)32-22-14-8-15-23-32;1-4(2)3-5/h6-25,28,35,39H,26-27H2,1-5H3,(H2-,46,47,48,52,54,55);3H,1-2H3/b49-34-;/t35-,39-;/m1./s1	FALSE
5858	100.010.568	Dichloromethyl(3,3,3-trifluoropropyl)silane	FC(F)(F)CC[SiH2]C(Cl)Cl	InChI=1S/C4H7Cl2F3Si/c5-3(6)10-2-1-4(7,8)9/h3H,1-2,10H2	FALSE	TRUE		211-623-4	675-62-7	no	organic	mono-constituent substance	FULL	≥ 100 to < 1000 tonnes	C[Si](Cl)(Cl)CCC(F)(F)F	InChI=1S/C4H7Cl2F3Si/c1-10(5,6)3-2-4(7,8)9/h2-3H2,1H3	FC(F)(F)CC[SiH2]C(Cl)Cl	FC(F)(F)CC[SiH2]C(Cl)Cl	TRUE	DTXCID807290	C[Si](Cl)(Cl)CCC(F)(F)F	FALSE	C[Si](CCC(F)(F)F)(Cl)Cl	OK	inconsistent structure	InChI=1S/C4H7Cl2F3Si/c5-3(6)10-2-1-4(7,8)9/h3H,1-2,10H2	InChI=1S/C4H7Cl2F3Si/c1-10(5,6)3-2-4(7,8)9/h2-3H2,1H3	InChI=1S/C4H7Cl2F3Si/c1-10(5,6)3-2-4(7,8)9/h2-3H2,1H3	FALSE	FALSE
30871	100.007.972	(R)-(3-carboxy-2-hydroxypropyl)trimethylammonium hydroxide	[OH-].C[N+](C)(C)C[C@H](O)CC(O)=O	InChI=1S/C7H15NO3.H2O/c1-8(2,3)5-6(9)4-7(10)11;/h6,9H,4-5H2,1-3H3;1H2/t6-;/m1./s1	FALSE	TRUE		208-768-0	541-15-1	no	organic	mono-constituent substance	FULL	≥ 1 to < 10 tonnes	C[N+](C)(C)C[C@H](O)CC([O-])=O	InChI=1S/C7H15NO3/c1-8(2,3)5-6(9)4-7(10)11/h6,9H,4-5H2,1-3H3/t6-/m1/s1	[OH-].C[N+](C)(C)C[C@H](O)CC(O)=O	[OH-].C[N+](C)(C)C[C@H](O)CC(O)=O	TRUE	DTXCID903208	C[N+](C)(C)C[C@H](O)CC([O-])=O		C[N+](C)(C)C[C@@H](CC(=O)[O-])O		inconsistent structure	InChI=1S/C7H15NO3.H2O/c1-8(2,3)5-6(9)4-7(10)11;/h6,9H,4-5H2,1-3H3;1H2/t6-;/m1./s1	InChI=1S/C7H15NO3/c1-8(2,3)5-6(9)4-7(10)11/h6,9H,4-5H2,1-3H3/t6-/m1/s1	InChI=1S/C7H15NO3/c1-8(2,3)5-6(9)4-7(10)11/h6,9H,4-5H2,1-3H3/t6-/m1/s1	FALSE	TRUE
27457	100.013.166	S-ethyl N-cyclohexylthiocarbamate	CCSC(=O)NC1CCCCC1	InChI=1S/C9H17NOS/c1-2-12-9(11)10-8-6-4-3-5-7-8/h8H,2-7H2,1H3,(H,10,11)	FALSE	TRUE		214-482-7	1134-23-2	no	organic	mono-constituent substance	FULL	≥ 10 to < 100 tonnes	CCSC(=O)N(CC)C1CCCCC1	InChI=1S/C11H21NOS/c1-3-12(11(13)14-4-2)10-8-6-5-7-9-10/h10H,3-9H2,1-2H3	CCSC(=O)NC1CCCCC1	CCSC(=O)NC1CCCCC1	TRUE	DTXCID4012356	CCSC(=O)N(CC)C1CCCCC1	FALSE	CCN(C1CCCCC1)C(=O)SCC	FALSE	inconsistent structure	InChI=1S/C9H17NOS/c1-2-12-9(11)10-8-6-4-3-5-7-8/h8H,2-7H2,1H3,(H,10,11)	InChI=1S/C11H21NOS/c1-3-12(11(13)14-4-2)10-8-6-5-7-9-10/h10H,3-9H2,1-2H3	InChI=1S/C11H21NOS/c1-3-12(11(13)14-4-2)10-8-6-5-7-9-10/h10H,3-9H2,1-2H3	FALSE	FALSE
5501	100.042.021	di-tert-butyl dicarbonate	CC(C)(C)OC(=O)OC(=O)OC(C)(C)C	InChI=1S/C10H18O5/c1-9(2,3)14-7(11)13-8(12)15-10(4,5)6/h1-6H3	TRUE			246-240-1	24424-99-5	no	organic	mono-constituent substance	FULL	≥ 0 to < 10 tonnes	CC(C)(C)OC(=O)OC(=O)OC(C)(C)C	InChI=1S/C10H18O5/c1-9(2,3)14-7(11)13-8(12)15-10(4,5)6/h1-6H3	CC(C)(C)OC(=O)OC(C)(C)C	CC(C)(C)OC(=O)OC(C)(C)C	TRUE	DTXCID9030466	CC(C)(C)OC(=O)OC(=O)OC(C)(C)C	FALSE	CC(C)(C)OC(=O)OC(=O)OC(C)(C)C	TRUE	inconsistent structure	InChI=1S/C9H18O3/c1-8(2,3)11-7(10)12-9(4,5)6/h1-6H3	InChI=1S/C10H18O5/c1-9(2,3)14-7(11)13-8(12)15-10(4,5)6/h1-6H3	InChI=1S/C10H18O5/c1-9(2,3)14-7(11)13-8(12)15-10(4,5)6/h1-6H3	FALSE	FALSE
5819	100.158.733	Benzenesulfonic acid, 2-[(2Z)-2-(2,6-diamino-4-oxo-5(4H)-pyrimidinylidene)hydrazinyl]-3-methyl-	CC1=CC=CC(=C1N\N=C1\C(N)=NC(N)=NC1=O)S(O)(=O)=O	InChI=1S/C11H12N6O4S/c1-5-3-2-4-6(22(19,20)21)7(5)16-17-8-9(12)14-11(13)15-10(8)18/h2-4,16H,1H3,(H,19,20,21)(H4,12,13,14,15,18)/b17-8-	TRUE			700-002-8	1333483-07-0	no	organic	mono-constituent substance	FULL	≥ 1 to < 10 tonnes	N(/N=C\1/C(N)=NC(N)=NC1=O)C2=C(S(=O)(=O)O)C=CC=C2C	InChI=1S/C11H12N6O4S/c1-5-3-2-4-6(22(19,20)21)7(5)16-17-8-9(12)14-11(13)15-10(8)18/h2-4,16H,1H3,(H,19,20,21)(H4,12,13,14,15,18)/b17-8-	CC1=CC=C(\N=N\C2=C(O)N=C(N)N=C2N)C(=C1)S(O)(=O)=O	CC1=CC=C(\N=N\C2=C(O)N=C(N)N=C2N)C(=C1)S(O)(=O)=O	TRUE	DTXCID301517372	CC1=CC(=C(C=C1)N=NC1=C(O)N=C(N)N=C1N)S(O)(=O)=O	FALSE			inconsistent structure	InChI=1S/C11H12N6O4S/c1-5-2-3-6(7(4-5)22(19,20)21)16-17-8-9(12)14-11(13)15-10(8)18/h2-4H,1H3,(H,19,20,21)(H5,12,13,14,15,18)/b17-16+	InChI=1S/C11H12N6O4S/c1-5-2-3-6(7(4-5)22(19,20)21)16-17-8-9(12)14-11(13)15-10(8)18/h2-4H,1H3,(H,19,20,21)(H5,12,13,14,15,18)		FALSE		N(/N=C\1/C(N)=NC(N)=NC1=O)C2=C(S(=O)(=O)O)C=CC=C2C	InChI=1S/C11H12N6O4S/c1-5-3-2-4-6(22(19,20)21)7(5)16-17-8-9(12)14-11(13)15-10(8)18/h2-4,16H,1H3,(H,19,20,21)(H4,12,13,14,15,18)/b17-8-	FALSE
3565	100.100.692	2,4-di-tert-butylcyclohexanone	CC(C)(C)C1CCC(=O)C(C1)C(C)(C)C	InChI=1S/C14H26O/c1-13(2,3)10-7-8-12(15)11(9-10)14(4,5)6/h10-11H,7-9H2,1-6H3	TRUE			405-340-7	13019-04-0	no	organic	mono-constituent substance	NONS	Cease manufacture	CC(C)(C)C1CCC(=O)C(C1)C(C)(C)C	InChI=1S/C14H26O/c1-13(2,3)10-7-8-12(15)11(9-10)14(4,5)6/h10-11H,7-9H2,1-6H3	CCCCC1CCC(=O)CC1CCCC	CCCCC1CCC(=O)CC1CCCC	TRUE	DTXCID50812877	CC(C)(C)C1CCC(=O)C(C1)C(C)(C)C	FALSE	CC(C)(C)C1CCC(=O)C(C1)C(C)(C)C	TRUE	inconsistent structure	InChI=1S/C14H26O/c1-3-5-7-12-9-10-14(15)11-13(12)8-6-4-2/h12-13H,3-11H2,1-2H3	InChI=1S/C14H26O/c1-13(2,3)10-7-8-12(15)11(9-10)14(4,5)6/h10-11H,7-9H2,1-6H3	InChI=1S/C14H26O/c1-13(2,3)10-7-8-12(15)11(9-10)14(4,5)6/h10-11H,7-9H2,1-6H3	FALSE	FALSE
3388	100.101.965	2-methyl-1-(3-sulfonatopropyl)naphth[1,2-d]oxazolium	CC1=[N+](CCCS([O-])(=O)=O)C2=C(O1)C=CC1=C2C=CC=C1	InChI=1S/C15H15NO4S/c1-11-16(9-4-10-21(17,18)19)15-13-6-3-2-5-12(13)7-8-14(15)20-11/h2-3,5-8H,4,9-10H2,1H3	TRUE			421-030-4	71806-08-1	no	organic	mono-constituent substance	NONS	No longer valid	C(CCS(=O)(=O)[O-])[N+]=1C=2C=3C(C=CC2OC1C)=CC=CC3	InChI=1S/C15H15NO4S/c1-11-16(9-4-10-21(17,18)19)15-13-6-3-2-5-12(13)7-8-14(15)20-11/h2-3,5-8H,4,9-10H2,1H3	CC1=[N+](CCS([O-])(=O)=O)C2=C3C=CC=CC3=CC=C2O1	CC1=[N+](CCS([O-])(=O)=O)C2=C3C=CC=CC3=CC=C2O1	TRUE						inconsistent structure	InChI=1S/C14H13NO4S/c1-10-15(8-9-20(16,17)18)14-12-5-3-2-4-11(12)6-7-13(14)19-10/h2-7H,8-9H2,1H3					C(CCS(=O)(=O)[O-])[N+]=1C=2C=3C(C=CC2OC1C)=CC=CC3	InChI=1S/C15H15NO4S/c1-11-16(9-4-10-21(17,18)19)15-13-6-3-2-5-12(13)7-8-14(15)20-11/h2-3,5-8H,4,9-10H2,1H3	FALSE
4786	100.100.828	1-(2,4-difluorophenyl)-6,7-difluoro-1,4-dihydro-4-oxoquinoline-3-carboxylic acid	OC(=O)C1=CN(C2=C(F)C=C(F)C=C2)C2=C(C=C(F)C(F)=C2)C1=O	InChI=1S/C16H7F4NO3/c17-7-1-2-13(12(20)3-7)21-6-9(16(23)24)15(22)8-4-10(18)11(19)5-14(8)21/h1-6H,(H,23,24)	TRUE			406-710-0	103995-01-3	no	organic	mono-constituent substance	NONS	Tonnage data confidential	OC(=O)C1=CN(C2=CC(F)=C(F)C=C2C1=O)C1=C(F)C=C(F)C=C1	InChI=1S/C16H7F4NO3/c17-7-1-2-13(12(20)3-7)21-6-9(16(23)24)15(22)8-4-10(18)11(19)5-14(8)21/h1-6H,(H,23,24)	OC(=O)C1CN(C2=CC=C(F)C=C2F)C2=CC(F)=C(F)C=C2C1=O	OC(=O)C1CN(C2=CC=C(F)C=C2F)C2=CC(F)=C(F)C=C2C1=O	TRUE	DTXCID70227065	OC(=O)C1=CN(C2=CC(F)=C(F)C=C2C1=O)C1=C(F)C=C(F)C=C1	FALSE	C1=CC(=C(C=C1F)F)N2C=C(C(=O)C3=CC(=C(C=C32)F)F)C(=O)O	OK	inconsistent structure	InChI=1S/C16H9F4NO3/c17-7-1-2-13(12(20)3-7)21-6-9(16(23)24)15(22)8-4-10(18)11(19)5-14(8)21/h1-5,9H,6H2,(H,23,24)	InChI=1S/C16H7F4NO3/c17-7-1-2-13(12(20)3-7)21-6-9(16(23)24)15(22)8-4-10(18)11(19)5-14(8)21/h1-6H,(H,23,24)	InChI=1S/C16H7F4NO3/c17-7-1-2-13(12(20)3-7)21-6-9(16(23)24)15(22)8-4-10(18)11(19)5-14(8)21/h1-6H,(H,23,24)	FALSE	FALSE	O=C(O)C1=CN(C2=CC=C(F)C=C2F)C3=CC(F)=C(F)C=C3C1=O
3495	100.102.846	N-(2,3-dihydroxypropyl)-N'-(3-hydroxy-2-oxopropyl)-2,4,6-triiodo-5-[2-(methylamino)-2-oxoethoxy]isophthalamide	CNC(=O)COC1=C(I)C(C(=O)NCC(=O)CO)=C(I)C(C(=O)NCC(O)CO)=C1I	InChI=1S/C17H20I3N3O8/c1-21-9(28)6-31-15-13(19)10(16(29)22-2-7(26)4-24)12(18)11(14(15)20)17(30)23-3-8(27)5-25/h7,24-26H,2-6H2,1H3,(H,21,28)(H,22,29)(H,23,30)	TRUE			430-120-2	2135874-53-0	no	organic	mono-constituent substance	NONS	Tonnage data confidential	C(NCC(CO)O)(=O)C1=C(I)C(C(NCC(CO)=O)=O)=C(I)C(OCC(NC)=O)=C1I	InChI=1S/C17H20I3N3O8/c1-21-9(28)6-31-15-13(19)10(16(29)22-2-7(26)4-24)12(18)11(14(15)20)17(30)23-3-8(27)5-25/h7,24-26H,2-6H2,1H3,(H,21,28)(H,22,29)(H,23,30)	CNC(=O)COC1=C(I)C(C(=O)NCC(O)CO)=C(I)C(C(=O)NCC(O)CO)=C1I	CNC(=O)COC1=C(I)C(C(=O)NCC(O)CO)=C(I)C(C(=O)NCC(O)CO)=C1I	TRUE						inconsistent structure	InChI=1S/C17H22I3N3O8/c1-21-9(28)6-31-15-13(19)10(16(29)22-2-7(26)4-24)12(18)11(14(15)20)17(30)23-3-8(27)5-25/h7-8,24-27H,2-6H2,1H3,(H,21,28)(H,22,29)(H,23,30)					C(NCC(CO)O)(=O)C1=C(I)C(C(NCC(CO)=O)=O)=C(I)C(OCC(NC)=O)=C1I	InChI=1S/C17H20I3N3O8/c1-21-9(28)6-31-15-13(19)10(16(29)22-2-7(26)4-24)12(18)11(14(15)20)17(30)23-3-8(27)5-25/h7,24-26H,2-6H2,1H3,(H,21,28)(H,22,29)(H,23,30)	FALSE
16235	100.102.600	(1R,3S,7R,8R,10R,13R)-5,5,7,9,9,13-hexamethyl-4,6-dioxatetracyclo[6.5.1.01,10.03,7]tetradecane	C[C@@H]1CC[C@@H]2C(C)(C)[C@H]3C[C@@]12C[C@@H]1OC(C)(C)O[C@]31C	InChI=1S/C18H30O2/c1-11-7-8-12-15(2,3)13-9-18(11,12)10-14-17(13,6)20-16(4,5)19-14/h11-14H,7-10H2,1-6H3/t11-,12-,13-,14+,17-,18-/m1/s1	TRUE			427-580-1	2135337-60-7	no	organic	mono-constituent substance	FULL	≥ 10 tonnes	C[C@H]1[C@@]23[C@@](C(C)(C)[C@@H](C2)[C@]4(C)[C@](C3)(OC(C)(C)O4)[H])(CC1)[H]	InChI=1S/C18H30O2/c1-11-7-8-12-15(2,3)13-9-18(11,12)10-14-17(13,6)20-16(4,5)19-14/h11-14H,7-10H2,1-6H3/t11-,12-,13-,14+,17-,18-/m1/s1	[H][C@@]12CC[C@@H](C)[C@]11C[C@]([H])(C2(C)C)[C@@]2(C)OC(C)(C)O[C@H]2C1	[H][C@@]12CC[C@@H](C)[C@]11C[C@]([H])(C2(C)C)[C@@]2(C)OC(C)(C)O[C@H]2C1	TRUE				C[C@@H]1CC[C@@H]2[C@@]13C[C@H](C2(C)C)[C@@]4([C@H](C3)OC(O4)(C)C)C	FALSE	inconsistent structure	InChI=1S/C18H30O2/c1-11-7-8-12-15(2,3)13-9-18(11,12)10-14-17(13,6)20-16(4,5)19-14/h11-14H,7-10H2,1-6H3/t11-,12+,13-,14+,17-,18-/m1/s1		InChI=1S/C18H30O2/c1-11-7-8-12-15(2,3)13-9-18(11,12)10-14-17(13,6)20-16(4,5)19-14/h11-14H,7-10H2,1-6H3/t11-,12+,13-,14+,17-,18-/m1/s1		TRUE	C[C@H]1[C@@]23[C@@](C(C)(C)[C@@H](C2)[C@]4(C)[C@](C3)(OC(C)(C)O4)[H])(CC1)[H]	InChI=1S/C18H30O2/c1-11-7-8-12-15(2,3)13-9-18(11,12)10-14-17(13,6)20-16(4,5)19-14/h11-14H,7-10H2,1-6H3/t11-,12-,13-,14+,17-,18-/m1/s1	FALSE
4896	100.101.742	Ethyl 6-O-dodecanoyl-D-glucopyranoside	CCCCCCCCCCCC(=O)OC[C@H]1OC(OCC)[C@H](O)[C@@H](O)[C@@H]1O	InChI=1S/C20H38O7/c1-3-5-6-7-8-9-10-11-12-13-16(21)26-14-15-17(22)18(23)19(24)20(27-15)25-4-2/h15,17-20,22-24H,3-14H2,1-2H3/t15-,17-,18+,19-,20?/m1/s1	TRUE			418-610-4	124285-43-4	no	organic	mono-constituent substance	NONS	Tonnage data confidential	C(OC(CCCCCCCCCCC)=O)[C@H]1OC(OCC)[C@H](O)[C@@H](O)[C@@H]1O	InChI=1S/C20H38O7/c1-3-5-6-7-8-9-10-11-12-13-16(21)26-14-15-17(22)18(23)19(24)20(27-15)25-4-2/h15,17-20,22-24H,3-14H2,1-2H3/t15-,17-,18+,19-,20?/m1/s1	CCCCCCCCCCCC(=O)OCC1OC(CCO)C(O)C(O)C1O	CCCCCCCCCCCC(=O)OCC1OC(CCO)C(O)C(O)C1O	TRUE	DTXCID101506434	CCCCCCCCCCCC(=O)OC[C@H]1OC(OCC)[C@H](O)[C@@H](O)[C@@H]1O	FALSE	CCCCCCCCCCCC(=O)OC[C@@H]1[C@H]([C@@H]([C@H](C(O1)OCC)O)O)O	FALSE	inconsistent structure	InChI=1S/C20H38O7/c1-2-3-4-5-6-7-8-9-10-11-17(22)26-14-16-19(24)20(25)18(23)15(27-16)12-13-21/h15-16,18-21,23-25H,2-14H2,1H3	InChI=1S/C20H38O7/c1-3-5-6-7-8-9-10-11-12-13-16(21)26-14-15-17(22)18(23)19(24)20(27-15)25-4-2/h15,17-20,22-24H,3-14H2,1-2H3/t15-,17-,18+,19-,20?/m1/s1	InChI=1S/C20H38O7/c1-3-5-6-7-8-9-10-11-12-13-16(21)26-14-15-17(22)18(23)19(24)20(27-15)25-4-2/h15,17-20,22-24H,3-14H2,1-2H3/t15-,17-,18+,19-,20?/m1/s1	FALSE	FALSE	C(OC(CCCCCCCCCCC)=O)[C@H]1OC(OCC)[C@H](O)[C@@H](O)[C@@H]1O
9944	100.102.662	Ethanol, 2-[2-[3-[2-(2,6-dichloro-4-nitrophenyl)diazenyl]-9H-carbazol-9-yl]ethoxy]-	OCCOCCN1C2=CC=C(C=C2C2=C1C=CC=C2)N=NC1=C(Cl)C=C(C=C1Cl)[N+]([O-])=O	InChI=1S/C22H18Cl2N4O4/c23-18-12-15(28(30)31)13-19(24)22(18)26-25-14-5-6-21-17(11-14)16-3-1-2-4-20(16)27(21)7-9-32-10-8-29/h1-6,11-13,29H,7-10H2	TRUE			428-240-5	2135870-35-6	no	organic	mono-constituent substance	NONS	Tonnage data confidential	C(COCCO)N1C=2C(C=3C1=CC=CC3)=CC(N=NC4=C(Cl)C=C(N(=O)=O)C=C4Cl)=CC2	InChI=1S/C22H18Cl2N4O4/c23-18-12-15(28(30)31)13-19(24)22(18)26-25-14-5-6-21-17(11-14)16-3-1-2-4-20(16)27(21)7-9-32-10-8-29/h1-6,11-13,29H,7-10H2	CCCCCCCCCCCCOC(=O)C1=CC=C(Cl)C(NC(=O)C2CCCC2=O)=C1	CCCCCCCCCCCCOC(=O)C1=CC=C(Cl)C(NC(=O)C2CCCC2=O)=C1	TRUE						inconsistent structure	InChI=1S/C25H36ClNO4/c1-2-3-4-5-6-7-8-9-10-11-17-31-25(30)19-15-16-21(26)22(18-19)27-24(29)20-13-12-14-23(20)28/h15-16,18,20H,2-14,17H2,1H3,(H,27,29)					C(COCCO)N1C=2C(C=3C1=CC=CC3)=CC(N=NC4=C(Cl)C=C(N(=O)=O)C=C4Cl)=CC2	InChI=1S/C22H18Cl2N4O4/c23-18-12-15(28(30)31)13-19(24)22(18)26-25-14-5-6-21-17(11-14)16-3-1-2-4-20(16)27(21)7-9-32-10-8-29/h1-6,11-13,29H,7-10H2	FALSE
11464	100.027.603	Retinyl propionate	CCC(=O)OC\C=C(/C)\C=C\C=C(/C)\C=C\C1=C(C)CCCC1(C)C	InChI=1S/C23H34O2/c1-7-22(24)25-17-15-19(3)11-8-10-18(2)13-14-21-20(4)12-9-16-23(21,5)6/h8,10-11,13-15H,7,9,12,16-17H2,1-6H3/b11-8+,14-13+,18-10+,19-15+	TRUE			230-363-2	7069-42-3	no	organic	mono-constituent substance	FULL	Cease manufacture	CCC(=O)OC\C=C(/C)\C=C\C=C(/C)\C=C\C1=C(C)CCCC1(C)C	InChI=1S/C23H34O2/c1-7-22(24)25-17-15-19(3)11-8-10-18(2)13-14-21-20(4)12-9-16-23(21,5)6/h8,10-11,13-15H,7,9,12,16-17H2,1-6H3/b11-8+,14-13+,18-10+,19-15+	CCC(=O)OC(=O)\C=C(/C)\C=C\C=C(/C)\C=C\C1=C(C)CCCC1(C)C	CCC(=O)OC(=O)\C=C(/C)\C=C\C=C(/C)\C=C\C1=C(C)CCCC1(C)C	TRUE	DTXCID60909505	CCC(=O)OC\C=C(/C)\C=C\C=C(/C)\C=C\C1=C(C)CCCC1(C)C	FALSE	CCC(=O)OC/C=C(\C)/C=C/C=C(\C)/C=C/C1=C(CCCC1(C)C)C	OK	inconsistent structure	InChI=1S/C23H32O3/c1-7-21(24)26-22(25)16-18(3)11-8-10-17(2)13-14-20-19(4)12-9-15-23(20,5)6/h8,10-11,13-14,16H,7,9,12,15H2,1-6H3/b11-8+,14-13+,17-10+,18-16+	InChI=1S/C23H34O2/c1-7-22(24)25-17-15-19(3)11-8-10-18(2)13-14-21-20(4)12-9-16-23(21,5)6/h8,10-11,13-15H,7,9,12,16-17H2,1-6H3/b11-8+,14-13+,18-10+,19-15+	InChI=1S/C23H34O2/c1-7-22(24)25-17-15-19(3)11-8-10-18(2)13-14-21-20(4)12-9-16-23(21,5)6/h8,10-11,13-15H,7,9,12,16-17H2,1-6H3/b11-8+,14-13+,18-10+,19-15+	FALSE	FALSE
3076	100.103.661	(R)-2-(9H-Fluoren-9-ylmethoxycarbonylamino)-3-phenyl-propionic acid	OC(=O)[C@@H](CC1=CC=CC=C1)NC(=O)OCC1C2=CC=CC=C2C2=C1C=CC=C2	InChI=1S/C24H21NO4/c26-23(27)22(14-16-8-2-1-3-9-16)25-24(28)29-15-21-19-12-6-4-10-17(19)18-11-5-7-13-20(18)21/h1-13,21-22H,14-15H2,(H,25,28)(H,26,27)/t22-/m1/s1	TRUE			440-090-2	86123-10-6	no	organic	mono-constituent substance	NONS	Tonnage data confidential	C1=CC=C(C=C1)C[C@H](C(=O)O)NC(=O)OCC2C3=CC=CC=C3C4=CC=CC=C24	InChI=1S/C24H21NO4/c26-23(27)22(14-16-8-2-1-3-9-16)25-24(28)29-15-21-19-12-6-4-10-17(19)18-11-5-7-13-20(18)21/h1-13,21-22H,14-15H2,(H,25,28)(H,26,27)/t22-/m1/s1	OC(=O)[C@@H](CC1=CC=CC=C1)NCOCC1C2=C(C=CC=C2)C2=C1C=CC=C2	OC(=O)[C@@H](CC1=CC=CC=C1)NCOCC1C2=C(C=CC=C2)C2=C1C=CC=C2	TRUE		[H][C@](CC1=CC=CC=C1)(N=C(O)OCC1C2=CC=CC=C2C2=CC=CC=C12)C([O-])=O	FALSE	C1=CC=C(C=C1)C[C@H](C(=O)O)NC(=O)OCC2C3=CC=CC=C3C4=CC=CC=C24	FALSE	inconsistent structure	InChI=1S/C24H23NO3/c26-24(27)23(14-17-8-2-1-3-9-17)25-16-28-15-22-20-12-6-4-10-18(20)19-11-5-7-13-21(19)22/h1-13,22-23,25H,14-16H2,(H,26,27)/t23-/m1/s1	InChI=1S/C24H21NO4/c26-23(27)22(14-16-8-2-1-3-9-16)25-24(28)29-15-21-19-12-6-4-10-17(19)18-11-5-7-13-20(18)21/h1-13,21-22H,14-15H2,(H,25,28)(H,26,27)/p-1/t22-/m1/s1	InChI=1S/C24H21NO4/c26-23(27)22(14-16-8-2-1-3-9-16)25-24(28)29-15-21-19-12-6-4-10-17(19)18-11-5-7-13-20(18)21/h1-13,21-22H,14-15H2,(H,25,28)(H,26,27)/t22-/m1/s1	FALSE	FALSE
16620	100.234.926	Pregna-1,4-diene-3,20-dione, 21-(acetyloxy)-9,11-epoxy-6-fluoro-17-hydroxy-16-methyl-, (6.alpha.,9.beta.,11.beta.,16.alpha.)-	C[C@@H]1C[C@H]2[C@@H]3C[C@H](F)C4=CC(=O)C=C[C@]4(C)[C@@]33O[C@H]3C[C@]2(C)[C@@]1(O)C(=O)COC(C)=O	InChI=1S/C24H29FO6/c1-12-7-15-16-9-18(25)17-8-14(27)5-6-21(17,3)24(16)20(31-24)10-22(15,4)23(12,29)19(28)11-30-13(2)26/h5-6,8,12,15-16,18,20,29H,7,9-11H2,1-4H3/t12-,15+,16+,18+,20+,21+,22+,23+,24-/m1/s1	TRUE			941-489-9	4571-51-1	no	organic	mono-constituent substance	FULL	≥ 1 to < 10 tonnes	[H][C@]12C[C@@]3(C)[C@@]([H])(C[C@@]([H])(C)[C@]3(O)C(=O)COC(C)=O)[C@]3([H])C[C@]([H])(F)C4=CC(=O)C=C[C@]4(C)[C@]13O2	InChI=1S/C24H29FO6/c1-12-7-15-16-9-18(25)17-8-14(27)5-6-21(17,3)24(16)20(31-24)10-22(15,4)23(12,29)19(28)11-30-13(2)26/h5-6,8,12,15-16,18,20,29H,7,9-11H2,1-4H3/t12-,15+,16+,18+,20+,21+,22+,23+,24-/m1/s1	CC(=O)OCC(=O)[C@@]1(O)CC[C@H]2[C@@H]3CC(F)C4=CC(=O)C=C[C@]4(C)[C@]33OC3C[C@]12C	CC(=O)OCC(=O)[C@@]1(O)CC[C@H]2[C@@H]3CC(F)C4=CC(=O)C=C[C@]4(C)[C@]33OC3C[C@]12C	TRUE	DTXCID801391181	[H][C@]12C[C@@]3(C)[C@@]([H])(C[C@@]([H])(C)[C@]3(O)C(=O)COC(C)=O)[C@]3([H])C[C@]([H])(F)C4=CC(=O)C=C[C@]4(C)[C@]13O2	FALSE	C[C@@H]1C[C@H]2[C@@H]3C[C@@H](C4=CC(=O)C=C[C@@]4([C@]35[C@@H](O5)C[C@@]2([C@]1(C(=O)COC(=O)C)O)C)C)F	FALSE	inconsistent structure	InChI=1S/C23H27FO6/c1-12(25)29-11-18(27)22(28)7-5-14-15-9-17(24)16-8-13(26)4-6-20(16,2)23(15)19(30-23)10-21(14,22)3/h4,6,8,14-15,17,19,28H,5,7,9-11H2,1-3H3/t14-,15-,17?,19?,20-,21-,22-,23-/m0/s1	InChI=1S/C24H29FO6/c1-12-7-15-16-9-18(25)17-8-14(27)5-6-21(17,3)24(16)20(31-24)10-22(15,4)23(12,29)19(28)11-30-13(2)26/h5-6,8,12,15-16,18,20,29H,7,9-11H2,1-4H3/t12-,15+,16+,18+,20+,21+,22+,23+,24-/m1/s1	InChI=1S/C24H29FO6/c1-12-7-15-16-9-18(25)17-8-14(27)5-6-21(17,3)24(16)20(31-24)10-22(15,4)23(12,29)19(28)11-30-13(2)26/h5-6,8,12,15-16,18,20,29H,7,9-11H2,1-4H3/t12-,15+,16+,18+,20+,21+,22+,23+,24-/m1/s1	FALSE	FALSE
12595	100.232.699	1-Propanol, 3-[[3-[[[3-(acetyloxy)-2,2-dimethylpropylidene]amino]methyl]-3,5,5-trimethylcyclohexyl]imino]-2,2-dimethyl-, 1-acetate	CC(=O)OCC(C)(C)C=NCC1(C)CC(CC(C)(C)C1)N=CC(C)(C)COC(C)=O	InChI=1S/C24H42N2O4/c1-18(27)29-16-22(5,6)13-25-15-24(9)11-20(10-21(3,4)12-24)26-14-23(7,8)17-30-19(2)28/h13-14,20H,10-12,15-17H2,1-9H3	TRUE			805-722-7	1064082-81-0	no	organic	mono-constituent substance	FULL	≥ 10 to < 100 tonnes	CC(=O)OCC(C)(C)C=NCC1(C)CC(CC(C)(C)C1)N=CC(C)(C)COC(C)=O	InChI=1S/C24H42N2O4/c1-18(27)29-16-22(5,6)13-25-15-24(9)11-20(10-21(3,4)12-24)26-14-23(7,8)17-30-19(2)28/h13-14,20H,10-12,15-17H2,1-9H3	CC(=C)OCC(C)(C)\C=N\CC1(C)CC(CC(C)(C)C1)\N=C\C(C)(C)COC(C)=O	CC(=C)OCC(C)(C)\C=N\CC1(C)CC(CC(C)(C)C1)\N=C\C(C)(C)COC(C)=O	TRUE	DTXCID001478054	CC(=O)OCC(C)(C)C=NCC1(C)CC(CC(C)(C)C1)N=CC(C)(C)COC(C)=O	FALSE			inconsistent structure	InChI=1S/C25H44N2O3/c1-19(2)29-17-23(6,7)14-26-16-25(10)12-21(11-22(4,5)13-25)27-15-24(8,9)18-30-20(3)28/h14-15,21H,1,11-13,16-18H2,2-10H3/b26-14+,27-15+	InChI=1S/C24H42N2O4/c1-18(27)29-16-22(5,6)13-25-15-24(9)11-20(10-21(3,4)12-24)26-14-23(7,8)17-30-19(2)28/h13-14,20H,10-12,15-17H2,1-9H3		FALSE	FALSE
26224	100.104.846	Carbamic acid, N-[(1S,2R)-2-hydroxy-3-[(2-methylpropyl)[(4-nitrophenyl)sulfonyl]amino]-1-(phenylmethyl)propyl]-, 1,1-dimethylethyl ester	CC(C)CN(C[C@@H](O)[C@H](CC1=CC=CC=C1)NC(=O)OC(C)(C)C)S(=O)(=O)C1=CC=C(C=C1)[N+]([O-])=O	InChI=1S/C25H35N3O7S/c1-18(2)16-27(36(33,34)21-13-11-20(12-14-21)28(31)32)17-23(29)22(15-19-9-7-6-8-10-19)26-24(30)35-25(3,4)5/h6-14,18,22-23,29H,15-17H2,1-5H3,(H,26,30)/t22-,23+/m0/s1	TRUE			467-070-6	191226-98-9	no	organic	mono-constituent substance	FULL	≥ 10 to < 100 tonnes	CC(C)CN(C[C@@H](O)[C@H](CC1=CC=CC=C1)NC(=O)OC(C)(C)C)S(=O)(=O)C1=CC=C(C=C1)[N+]([O-])=O	InChI=1S/C25H35N3O7S/c1-18(2)16-27(36(33,34)21-13-11-20(12-14-21)28(31)32)17-23(29)22(15-19-9-7-6-8-10-19)26-24(30)35-25(3,4)5/h6-14,18,22-23,29H,15-17H2,1-5H3,(H,26,30)/t22-,23+/m0/s1	CCCCOC(=O)N[C@@H](CC1=CC=CC=C1)[C@H](O)CN(SC1=CC=C(C=C1)N(=O)=O)C(C)(C)C	CCCCOC(=O)N[C@@H](CC1=CC=CC=C1)[C@H](O)CN(SC1=CC=C(C=C1)N(=O)=O)C(C)(C)C	TRUE		CC(C)CN(C[C@@H](O)[C@H](CC1=CC=CC=C1)NC(=O)OC(C)(C)C)S(=O)(=O)C1=CC=C(C=C1)[N+]([O-])=O	FALSE	CC(C)CN(C[C@H]([C@H](CC1=CC=CC=C1)NC(=O)OC(C)(C)C)O)S(=O)(=O)C2=CC=C(C=C2)[N+](=O)[O-]	FALSE	inconsistent structure	InChI=1S/C25H35N3O5S/c1-5-6-16-33-24(30)26-22(17-19-10-8-7-9-11-19)23(29)18-27(25(2,3)4)34-21-14-12-20(13-15-21)28(31)32/h7-15,22-23,29H,5-6,16-18H2,1-4H3,(H,26,30)/t22-,23+/m0/s1	InChI=1S/C25H35N3O7S/c1-18(2)16-27(36(33,34)21-13-11-20(12-14-21)28(31)32)17-23(29)22(15-19-9-7-6-8-10-19)26-24(30)35-25(3,4)5/h6-14,18,22-23,29H,15-17H2,1-5H3,(H,26,30)/t22-,23+/m0/s1	InChI=1S/C25H35N3O7S/c1-18(2)16-27(36(33,34)21-13-11-20(12-14-21)28(31)32)17-23(29)22(15-19-9-7-6-8-10-19)26-24(30)35-25(3,4)5/h6-14,18,22-23,29H,15-17H2,1-5H3,(H,26,30)/t22-,23+/m0/s1	FALSE	FALSE
9896	100.101.795	Benzoic acid, 4,4'-carbonylbis[2-[[[3-(triethoxysilyl)propyl]amino]carbonyl]-	CCO[Si](CCCNC(=O)C1=C(C=CC(=C1)C(=O)C1=CC(C(=O)NCCC[Si](OCC)(OCC)OCC)=C(C=C1)C(O)=O)C(O)=O)(OCC)OCC	InChI=1S/C35H52N2O13Si2/c1-7-45-51(46-8-2,47-9-3)21-13-19-36-32(39)29-23-25(15-17-27(29)34(41)42)31(38)26-16-18-28(35(43)44)30(24-26)33(40)37-20-14-22-52(48-10-4,49-11-5)50-12-6/h15-18,23-24H,7-14,19-22H2,1-6H3,(H,36,39)(H,37,40)(H,41,42)(H,43,44)	TRUE			419-190-5	1010697-95-6	no	organic	mono-constituent substance	NONS	Tonnage data confidential	[Si](CCCNC(=O)C1=C(C(O)=O)C=CC(C(=O)C2=CC(C(NCCC[Si](OCC)(OCC)OCC)=O)=C(C(O)=O)C=C2)=C1)(OCC)(OCC)OCC	InChI=1S/C35H52N2O13Si2/c1-7-45-51(46-8-2,47-9-3)21-13-19-36-32(39)29-23-25(15-17-27(29)34(41)42)31(38)26-16-18-28(35(43)44)30(24-26)33(40)37-20-14-22-52(48-10-4,49-11-5)50-12-6/h15-18,23-24H,7-14,19-22H2,1-6H3,(H,36,39)(H,37,40)(H,41,42)(H,43,44)	CCO[Si](CCCNC(=O)C1=CC(=CC(=C1)C(=O)C1=CC=C(C=C1C(=O)NCCC[Si](OCC)(OCC)OCC)C(O)=O)C(O)=O)(OCC)OCC	CCO[Si](CCCNC(=O)C1=CC(=CC(=C1)C(=O)C1=CC=C(C=C1C(=O)NCCC[Si](OCC)(OCC)OCC)C(O)=O)C(O)=O)(OCC)OCC	TRUE						inconsistent structure	InChI=1S/C35H52N2O13Si2/c1-7-45-51(46-8-2,47-9-3)19-13-17-36-32(39)27-21-26(22-28(23-27)35(43)44)31(38)29-16-15-25(34(41)42)24-30(29)33(40)37-18-14-20-52(48-10-4,49-11-5)50-12-6/h15-16,21-24H,7-14,17-20H2,1-6H3,(H,36,39)(H,37,40)(H,41,42)(H,43,44)				FALSE	[Si](CCCNC(=O)C1=C(C(O)=O)C=CC(C(=O)C2=CC(C(NCCC[Si](OCC)(OCC)OCC)=O)=C(C(O)=O)C=C2)=C1)(OCC)(OCC)OCC	InChI=1S/C35H52N2O13Si2/c1-7-45-51(46-8-2,47-9-3)21-13-19-36-32(39)29-23-25(15-17-27(29)34(41)42)31(38)26-16-18-28(35(43)44)30(24-26)33(40)37-20-14-22-52(48-10-4,49-11-5)50-12-6/h15-18,23-24H,7-14,19-22H2,1-6H3,(H,36,39)(H,37,40)(H,41,42)(H,43,44)	FALSE
4581	100.104.811	Butanamide, 4-oxo-	NC(=O)CCC=O	InChI=1S/C4H7NO2/c5-4(7)2-1-3-6/h3H,1-2H2,(H2,5,7)	TRUE			464-950-1	27719-81-9	no	organic	mono-constituent substance	NONS	Cease manufacture	C(C(N)=O)CC=O	InChI=1S/C4H7NO2/c5-4(7)2-1-3-6/h3H,1-2H2,(H2,5,7)	CN(C)C(=O)CCC(=O)C1=CC=C(C)C=C1	CN(C)C(=O)CCC(=O)C1=CC=C(C)C=C1	TRUE	DTXCID90553111	NC(=O)CCC=O		C(CC(=O)N)C=O		inconsistent structure	InChI=1S/C13H17NO2/c1-10-4-6-11(7-5-10)12(15)8-9-13(16)14(2)3/h4-7H,8-9H2,1-3H3	InChI=1S/C4H7NO2/c5-4(7)2-1-3-6/h3H,1-2H2,(H2,5,7)	InChI=1S/C4H7NO2/c5-4(7)2-1-3-6/h3H,1-2H2,(H2,5,7)	FALSE	FALSE	C(C(N)=O)CC=O	InChI=1S/C4H7NO2/c5-4(7)2-1-3-6/h3H,1-2H2,(H2,5,7)	FALSE
3323	100.101.934	Methyl tetrahydro-2-furancarboxylate	COC(=O)C1CCCO1	InChI=1S/C6H10O3/c1-8-6(7)5-3-2-4-9-5/h5H,2-4H2,1H3	TRUE			420-670-1	37443-42-8	no	organic	mono-constituent substance	NONS	No longer valid	COC(=O)C1CCCO1	InChI=1S/C6H10O3/c1-8-6(7)5-3-2-4-9-5/h5H,2-4H2,1H3	COC(=O)C1CCOC1	COC(=O)C1CCOC1	TRUE	DTXCID60969583	COC(=O)C1CCCO1	FALSE	COC(=O)C1CCCO1	TRUE	inconsistent structure	InChI=1S/C6H10O3/c1-8-6(7)5-2-3-9-4-5/h5H,2-4H2,1H3	InChI=1S/C6H10O3/c1-8-6(7)5-3-2-4-9-5/h5H,2-4H2,1H3	InChI=1S/C6H10O3/c1-8-6(7)5-3-2-4-9-5/h5H,2-4H2,1H3	FALSE	FALSE
9047	100.103.407	Benzoic acid, 2,3,5,6-tetrafluoro-	OC(=O)C1=C(F)C(F)=CC(F)=C1F	InChI=1S/C7H2F4O2/c8-2-1-3(9)6(11)4(5(2)10)7(12)13/h1H,(H,12,13)	TRUE			435-890-3	652-18-6	no	organic	mono-constituent substance	NONS	Tonnage data confidential	OC(=O)C1=C(F)C(F)=CC(F)=C1F	InChI=1S/C7H2F4O2/c8-2-1-3(9)6(11)4(5(2)10)7(12)13/h1H,(H,12,13)	OC(=O)C1=CC(F)=C(F)C(F)=C1F	OC(=O)C1=CC(F)=C(F)C(F)=C1F	TRUE	DTXCID40291879	OC(=O)C1=C(F)C(F)=CC(F)=C1F	FALSE	C1=C(C(=C(C(=C1F)F)C(=O)O)F)F	OK	inconsistent structure	InChI=1S/C7H2F4O2/c8-3-1-2(7(12)13)4(9)6(11)5(3)10/h1H,(H,12,13)	InChI=1S/C7H2F4O2/c8-2-1-3(9)6(11)4(5(2)10)7(12)13/h1H,(H,12,13)	InChI=1S/C7H2F4O2/c8-2-1-3(9)6(11)4(5(2)10)7(12)13/h1H,(H,12,13)	FALSE	FALSE
8631	100.104.453	Benzene, 1-chloro-4-isocyanato-2-(trifluoromethyl)-	FC(F)(F)C1=C(Cl)C=CC(=C1)N=C=O	InChI=1S/C8H3ClF3NO/c9-7-2-1-5(13-4-14)3-6(7)8(10,11)12/h1-3H	TRUE			455-070-9	327-78-6	no	organic	mono-constituent substance	NONS	Tonnage data confidential	O=C=NC1=CC=C(Cl)C(=C1)C(F)(F)F	InChI=1S/C8H3ClF3NO/c9-7-2-1-5(13-4-14)3-6(7)8(10,11)12/h1-3H	FC(F)(F)C1=C(Cl)C(=CC=C1)N=C=O	FC(F)(F)C1=C(Cl)C(=CC=C1)N=C=O	TRUE	DTXCID80320854	FC(F)(F)C1=C(Cl)C=CC(=C1)N=C=O	FALSE	C1=CC(=C(C=C1N=C=O)C(F)(F)F)Cl	FALSE	inconsistent structure	InChI=1S/C8H3ClF3NO/c9-7-5(8(10,11)12)2-1-3-6(7)13-4-14/h1-3H	InChI=1S/C8H3ClF3NO/c9-7-2-1-5(13-4-14)3-6(7)8(10,11)12/h1-3H	InChI=1S/C8H3ClF3NO/c9-7-2-1-5(13-4-14)3-6(7)8(10,11)12/h1-3H	FALSE	FALSE	O=C=NC1=CC=C(Cl)C(=C1)C(F)(F)F
24636	100.018.081	2,2,6,6-tetramethylpiperidinooxy	CC1(C)CCCC(C)(C)N1[O]	InChI=1S/C9H18NO/c1-8(2)6-5-7-9(3,4)10(8)11/h5-7H2,1-4H3	TRUE			219-888-8	2564-83-2	no	organic	mono-constituent substance	FULL	≥ 10 to < 100 tonnes	CC1(C)CCCC(C)(C)N1[O]	InChI=1S/C9H18NO/c1-8(2)6-5-7-9(3,4)10(8)11/h5-7H2,1-4H3	CC1(C)CCCC(C)(C)N1O	CC1(C)CCCC(C)(C)N1O	TRUE	DTXCID7037345	CC1(C)CCCC(C)(C)N1[O]				inconsistent structure	InChI=1S/C9H19NO/c1-8(2)6-5-7-9(3,4)10(8)11/h11H,5-7H2,1-4H3	InChI=1S/C9H18NO/c1-8(2)6-5-7-9(3,4)10(8)11/h5-7H2,1-4H3		FALSE
13027	100.103.612	Carbamic acid	NC(O)=O	InChI=1S/CH3NO2/c2-1(3)4/h2H2,(H,3,4)	TRUE			439-530-6	463-77-4	no	organic	mono-constituent substance	NONS	Tonnage data confidential	O=C(O)N	InChI=1S/CH3NO2/c2-1(3)4/h2H2,(H,3,4)	COC(=O)N(C1=CC=CC=C1)C1=CC=CC=C1CC(O)=O	COC(=O)N(C1=CC=CC=C1)C1=CC=CC=C1CC(O)=O	TRUE	DTXCID5027986	NC(O)=O	FALSE	C(=O)(N)O	FALSE	inconsistent structure	InChI=1S/C16H15NO4/c1-21-16(20)17(13-8-3-2-4-9-13)14-10-6-5-7-12(14)11-15(18)19/h2-10H,11H2,1H3,(H,18,19)	InChI=1S/CH3NO2/c2-1(3)4/h2H2,(H,3,4)	InChI=1S/CH3NO2/c2-1(3)4/h2H2,(H,3,4)	FALSE	FALSE	O=C(O)N
12937	100.105.126	1-(CYCLOOCT-3-ENYL)-PROPAN-1-OL AND ISOMERS	-					476-140-5	899810-84-5	no	organic	mono-constituent substance	NONS	Tonnage data confidential	CC(CCCCC=O)C=C(C)C		CCC(O)C1CCCC\C=C/C1	CCC(O)C1CCCC\C=C/C1	TRUE	DTXCID401028500	CC(CCCCC=O)C=C(C)C	FALSE	CC(CCCCC=O)C=C(C)C	TRUE	inconsistent structure	InChI=1S/C11H20O/c1-2-11(12)10-8-6-4-3-5-7-9-10/h4,6,10-12H,2-3,5,7-9H2,1H3/b6-4-	InChI=1S/C11H20O/c1-10(2)9-11(3)7-5-4-6-8-12/h8-9,11H,4-7H2,1-3H3	InChI=1S/C11H20O/c1-10(2)9-11(3)7-5-4-6-8-12/h8-9,11H,4-7H2,1-3H3	FALSE	FALSE
10890	100.101.185	Disodium 5-[5-[4-(5-chloro-2,6-difluoropyrimidin-4-ylamino)benzamido]-2-sulfonatophenylazo]-1-ethyl-6-hydroxy-4-methyl-2-oxo-3-pyridylmethylsulfonate	[Na+].[Na+].CCN1C(O)=C(N=NC2=C(C=CC(NC(=O)C3=CC=C(NC4=C(Cl)C(F)=NC(F)=N4)C=C3)=C2)S([O-])(=O)=O)C(C)=C(CS([O-])(=O)=O)C1=O	InChI=1S/C26H22ClF2N7O9S2.2Na/c1-3-36-24(38)16(11-46(40,41)42)12(2)20(25(36)39)35-34-17-10-15(8-9-18(17)47(43,44)45)31-23(37)13-4-6-14(7-5-13)30-22-19(27)21(28)32-26(29)33-22;;/h4-10,39H,3,11H2,1-2H3,(H,31,37)(H,30,32,33)(H,40,41,42)(H,43,44,45);;/q;2*+1/p-2	TRUE			412-530-3	157627-98-0	no	organic	mono-constituent substance	FULL	≥ 0 tonnes	[Na+].[Na+].CCN1C(O)=C(N=NC2=CC(NC(=O)C3=CC=C(NC4=NC(F)=NC(F)=C4Cl)C=C3)=CC=C2S([O-])(=O)=O)C(C)=C(CS([O-])(=O)=O)C1=O	InChI=1S/C26H22ClF2N7O9S2.2Na/c1-3-36-24(38)16(11-46(40,41)42)12(2)20(25(36)39)35-34-17-10-15(8-9-18(17)47(43,44)45)31-23(37)13-4-6-14(7-5-13)30-22-19(27)21(28)32-26(29)33-22;;/h4-10,39H,3,11H2,1-2H3,(H,31,37)(H,30,32,33)(H,40,41,42)(H,43,44,45);;/q;2*+1/p-2	CCN1C(O)=C(N=NC2=C(C=CC(NC(=O)C3=CC=C(NC4=NC(F)=NC(F)=C4Cl)C=C3)=C2)S(O)(=O)=O)C(C)=C(CS(O)(=O)=O)C1=O	CCN1C(O)=C(N=NC2=C(C=CC(NC(=O)C3=CC=C(NC4=NC(F)=NC(F)=C4Cl)C=C3)=C2)S(O)(=O)=O)C(C)=C(CS(O)(=O)=O)C1=O	TRUE	DTXCID001079456	[Na+].[Na+].CCN1C(O)=C(N=NC2=CC(NC(=O)C3=CC=C(NC4=NC(F)=NC(F)=C4Cl)C=C3)=CC=C2S([O-])(=O)=O)C(C)=C(CS([O-])(=O)=O)C1=O	FALSE	CCN1C(=C(C(=C(C1=O)N=NC2=C(C=CC(=C2)NC(=O)C3=CC=C(C=C3)NC4=C(C(=NC(=N4)F)F)Cl)S(=O)(=O)[O-])C)CS(=O)(=O)[O-])O.[Na+].[Na+]	FALSE	inconsistent structure, SciFinder has also wrong SMILES	InChI=1S/C26H22ClF2N7O9S2/c1-3-36-24(38)16(11-46(40,41)42)12(2)20(25(36)39)35-34-17-10-15(8-9-18(17)47(43,44)45)31-23(37)13-4-6-14(7-5-13)30-22-19(27)21(28)32-26(29)33-22/h4-10,39H,3,11H2,1-2H3,(H,31,37)(H,30,32,33)(H,40,41,42)(H,43,44,45)	InChI=1S/C26H22ClF2N7O9S2.2Na/c1-3-36-24(38)16(11-46(40,41)42)12(2)20(25(36)39)35-34-17-10-15(8-9-18(17)47(43,44)45)31-23(37)13-4-6-14(7-5-13)30-22-19(27)21(28)32-26(29)33-22;;/h4-10,39H,3,11H2,1-2H3,(H,31,37)(H,30,32,33)(H,40,41,42)(H,43,44,45);;/q;2*+1/p-2	InChI=1S/C26H22ClF2N7O9S2.2Na/c1-3-36-24(38)16(11-46(40,41)42)12(2)20(25(36)39)35-34-17-10-15(8-9-18(17)47(43,44)45)31-23(37)13-4-6-14(7-5-13)30-22-19(27)21(28)32-26(29)33-22;;/h4-10,38H,3,11H2,1-2H3,(H,31,37)(H,30,32,33)(H,40,41,42)(H,43,44,45);;/q;2*+1/p-2	FALSE	FALSE
12986	100.100.796	1-(3-mesyloxy-5-trityloxymethyl-2-D-threofuryl)thymine	-					406-360-9	104218-44-2	no	organic	mono-constituent substance	NONS	Tonnage data confidential	[H][C@@]1(C[C@]([H])(OS(C)(=O)=O)[C@@]([H])(COC(C2=CC=CC=C2)(C2=CC=CC=C2)C2=CC=CC=C2)O1)N1C=C(C)C(O)=NC1=O		CC1=CN(C2CC(OS(C)(=O)=O)C(COC(C3=CC=CC=C3)(C3=CC=CC=C3)C3=CC=CC=C3)O2)C(=O)NC1=O	CC1=CN(C2CC(OS(C)(=O)=O)C(COC(C3=CC=CC=C3)(C3=CC=CC=C3)C3=CC=CC=C3)O2)C(=O)NC1=O	TRUE	DTXCID201337947	[H][C@@]1(C[C@]([H])(OS(C)(=O)=O)[C@@]([H])(COC(C2=CC=CC=C2)(C2=CC=CC=C2)C2=CC=CC=C2)O1)N1C=C(C)C(O)=NC1=O	FALSE	CC1=CN(C(=O)NC1=O)[C@H]2C[C@@H]([C@H](O2)COC(C3=CC=CC=C3)(C4=CC=CC=C4)C5=CC=CC=C5)OS(=O)(=O)C	FALSE	missing stereochemistry	InChI=1S/C30H30N2O7S/c1-21-19-32(29(34)31-28(21)33)27-18-25(39-40(2,35)36)26(38-27)20-37-30(22-12-6-3-7-13-22,23-14-8-4-9-15-23)24-16-10-5-11-17-24/h3-17,19,25-27H,18,20H2,1-2H3,(H,31,33,34)	InChI=1S/C30H30N2O7S/c1-21-19-32(29(34)31-28(21)33)27-18-25(39-40(2,35)36)26(38-27)20-37-30(22-12-6-3-7-13-22,23-14-8-4-9-15-23)24-16-10-5-11-17-24/h3-17,19,25-27H,18,20H2,1-2H3,(H,31,33,34)/t25-,26+,27+/m0/s1	InChI=1S/C30H30N2O7S/c1-21-19-32(29(34)31-28(21)33)27-18-25(39-40(2,35)36)26(38-27)20-37-30(22-12-6-3-7-13-22,23-14-8-4-9-15-23)24-16-10-5-11-17-24/h3-17,19,25-27H,18,20H2,1-2H3,(H,31,33,34)/t25-,26+,27+/m0/s1	FALSE	FALSE
4203	100.100.540	(6R-trans)-7-amino-3-[([5-(carboxymethyl)-4-methyl-2-thiazolyl]thio)methyl]-8-oxo- 5-thia-1-azabicyclo-[4.2.0]oct-2-en-2-carboxylic acid	-					403-690-5	111298-82-9	no	organic	mono-constituent substance	NONS	Tonnage data confidential	CC1=C(SC(=N1)SCC2=C(N3[C@@H]([C@@H](C3=O)N)SC2)C(=O)O)CC(=O)O		CC1=C(CC(O)=O)SC(SCC2=C(N3C(SC2)C(N)C3=O)C(O)=O)=N1	CC1=C(CC(O)=O)SC(SCC2=C(N3C(SC2)C(N)C3=O)C(O)=O)=N1	TRUE				CC1=C(SC(=N1)SCC2=C(N3[C@@H]([C@@H](C3=O)N)SC2)C(=O)O)CC(=O)O	FALSE	missing stereochemistry	InChI=1S/C14H15N3O5S3/c1-5-7(2-8(18)19)25-14(16-5)24-4-6-3-23-12-9(15)11(20)17(12)10(6)13(21)22/h9,12H,2-4,15H2,1H3,(H,18,19)(H,21,22)		InChI=1S/C14H15N3O5S3/c1-5-7(2-8(18)19)25-14(16-5)24-4-6-3-23-12-9(15)11(20)17(12)10(6)13(21)22/h9,12H,2-4,15H2,1H3,(H,18,19)(H,21,22)/t9-,12-/m1/s1		FALSE
30434	100.102.792	(trans(trans))-4'-but-3-enyl-4-(4-methylphenyl)-bicyclohexyl	-					429-580-7	129738-42-7	no	organic	mono-constituent substance	FULL	≥ 0 to < 10 tonnes	[H][C@@]1(CC[C@@]([H])(CC1)[C@@]1([H])CC[C@H](CCC=C)CC1)C1=CC=C(C)C=C1		[H][C@@]1(CC[C@H](CCC=C)CC1)[C@@]1([H])CCC(CC1)C1=CC=C(C)C=C1	[H][C@@]1(CC[C@H](CCC=C)CC1)[C@@]1([H])CCC(CC1)C1=CC=C(C)C=C1	TRUE	DTXCID401768645	[H][C@@]1(CC[C@@]([H])(CC1)[C@@]1([H])CC[C@H](CCC=C)CC1)C1=CC=C(C)C=C1	FALSE	CC1=CC=C(C=C1)C2CCC(CC2)C3CCC(CC3)CCC=C	FALSE	missing stereochemistry	InChI=1S/C23H34/c1-3-4-5-19-8-12-21(13-9-19)23-16-14-22(15-17-23)20-10-6-18(2)7-11-20/h3,6-7,10-11,19,21-23H,1,4-5,8-9,12-17H2,2H3/t19-,21-,22?,23-	InChI=1S/C23H34/c1-3-4-5-19-8-12-21(13-9-19)23-16-14-22(15-17-23)20-10-6-18(2)7-11-20/h3,6-7,10-11,19,21-23H,1,4-5,8-9,12-17H2,2H3/t19-,21-,22-,23-	InChI=1S/C23H34/c1-3-4-5-19-8-12-21(13-9-19)23-16-14-22(15-17-23)20-10-6-18(2)7-11-20/h3,6-7,10-11,19,21-23H,1,4-5,8-9,12-17H2,2H3	FALSE	FALSE	C(CC=C)[C@H]1CC[C@]([C@]2(CC[C@@](CC2)(C3=CC=C(C)C=C3)[H])[H])(CC1)[H]
3411	100.101.966	17-spiro(5,5-dimethyl-1,3-dioxan-2-yl)androsta-1,4-diene-3-one	-					421-050-3	13258-43-0	no	organic	mono-constituent substance	NONS	Cease manufacture	C[C@@]12C3(CC[C@]1([C@]4([C@](CC2)([C@]5(C)C(CC4)=CC(=O)C=C5)[H])[H])[H])OCC(C)(C)CO3		CC12CCC3C(CCC4=CC(=O)C=CC34C)C1CCC21OCC(C)(C)CO1	CC12CCC3C(CCC4=CC(=O)C=CC34C)C1CCC21OCC(C)(C)CO1	TRUE						missing stereochemistry	InChI=1S/C24H34O3/c1-21(2)14-26-24(27-15-21)12-9-20-18-6-5-16-13-17(25)7-10-22(16,3)19(18)8-11-23(20,24)4/h7,10,13,18-20H,5-6,8-9,11-12,14-15H2,1-4H3					C[C@@]12C3(CC[C@]1([C@]4([C@](CC2)([C@]5(C)C(CC4)=CC(=O)C=C5)[H])[H])[H])OCC(C)(C)CO3	InChI=1S/C24H34O3/c1-21(2)14-26-24(27-15-21)12-9-20-18-6-5-16-13-17(25)7-10-22(16,3)19(18)8-11-23(20,24)4/h7,10,13,18-20H,5-6,8-9,11-12,14-15H2,1-4H3/t18-,19+,20+,22+,23+/m1/s1	FALSE
24839	100.032.994	trans-cyclohexane-1,2-dinitrilotetraacetic acid	-					236-308-9	13291-61-7	no	organic	mono-constituent substance	FULL	≥ 10 to < 100 tonnes	OC(=O)CN(CC(O)=O)[C@@H]1CCCC[C@H]1N(CC(O)=O)CC(O)=O		OC(=O)CN(CC(O)=O)C1CCCCC1N(CC(O)=O)CC(O)=O	OC(=O)CN(CC(O)=O)C1CCCCC1N(CC(O)=O)CC(O)=O	TRUE	DTXCID801028645	OC(=O)CN(CC(O)=O)[C@@H]1CCCC[C@H]1N(CC(O)=O)CC(O)=O		C1CC[C@H]([C@@H](C1)N(CC(=O)O)CC(=O)O)N(CC(=O)O)CC(=O)O		missing stereochemistry	InChI=1S/C14H22N2O8/c17-11(18)5-15(6-12(19)20)9-3-1-2-4-10(9)16(7-13(21)22)8-14(23)24/h9-10H,1-8H2,(H,17,18)(H,19,20)(H,21,22)(H,23,24)	InChI=1S/C14H22N2O8/c17-11(18)5-15(6-12(19)20)9-3-1-2-4-10(9)16(7-13(21)22)8-14(23)24/h9-10H,1-8H2,(H,17,18)(H,19,20)(H,21,22)(H,23,24)/t9-,10-/m1/s1	InChI=1S/C14H22N2O8/c17-11(18)5-15(6-12(19)20)9-3-1-2-4-10(9)16(7-13(21)22)8-14(23)24/h9-10H,1-8H2,(H,17,18)(H,19,20)(H,21,22)(H,23,24)/t9-,10-/m1/s1	FALSE	TRUE
22240	100.101.238	(1R)-1-[(4R,4aR,8aS)-2,6-bis(3,4-dimethylphenyl)tetrahydro[1,3]dioxino[5,4-d][1,3]dioxin-4-yl]ethane-1,2-diol	-					413-110-2	135861-56-2	no	organic	mono-constituent substance	FULL	≥ 1 to < 10 tonnes	[H][C@]12COC(O[C@@]1([H])[C@]([H])(OC(O2)C1=CC=C(C)C(C)=C1)[C@H](O)CO)C1=CC=C(C)C(C)=C1		CC1=CC=C(C=C1C)C1OCC2OC(OC(C(O)CO)C2O1)C1=CC=C(C)C(C)=C1	CC1=CC=C(C=C1C)C1OCC2OC(OC(C(O)CO)C2O1)C1=CC=C(C)C(C)=C1	TRUE	DTXCID5029899	[H][C@]12COC(O[C@@]1([H])[C@]([H])(OC(O2)C1=CC=C(C)C(C)=C1)[C@H](O)CO)C1=CC=C(C)C(C)=C1	FALSE	CC1=C(C=C(C=C1)C2OC[C@H]3[C@@H](O2)[C@H](OC(O3)C4=CC(=C(C=C4)C)C)[C@@H](CO)O)C	OK	missing stereochemistry	InChI=1S/C24H30O6/c1-13-5-7-17(9-15(13)3)23-27-12-20-22(30-23)21(19(26)11-25)29-24(28-20)18-8-6-14(2)16(4)10-18/h5-10,19-26H,11-12H2,1-4H3	InChI=1S/C24H30O6/c1-13-5-7-17(9-15(13)3)23-27-12-20-22(30-23)21(19(26)11-25)29-24(28-20)18-8-6-14(2)16(4)10-18/h5-10,19-26H,11-12H2,1-4H3/t19-,20+,21-,22-,23?,24?/m1/s1	InChI=1S/C24H30O6/c1-13-5-7-17(9-15(13)3)23-27-12-20-22(30-23)21(19(26)11-25)29-24(28-20)18-8-6-14(2)16(4)10-18/h5-10,19-26H,11-12H2,1-4H3/t19-,20+,21-,22-,23?,24?/m1/s1	FALSE	FALSE
9807	100.101.519	Methyl 2-[4-(2-chloro-4-nitrophenylazo)-3-(1-oxopropyl)amino]phenylaminopropionate	-					416-240-8	155522-12-6	no	organic	mono-constituent substance	NONS	Tonnage data confidential	CCC(=O)NC1=C(C=CC(N[C@@H](C)C(=O)OC)=C1)\N=N\C1=C(Cl)C=C(C=C1)N(=O)=O		CCC(=O)NC1=CC(NC(C)C(=O)OC)=CC=C1N=NC1=CC=C(C=C1Cl)N(=O)=O	CCC(=O)NC1=CC(NC(C)C(=O)OC)=CC=C1N=NC1=CC=C(C=C1Cl)N(=O)=O	TRUE	DTXCID80675356	CCC(=O)NC1=C(C=CC(N[C@@H](C)C(=O)OC)=C1)\N=N\C1=C(Cl)C=C(C=C1)[N+]([O-])=O	Tautomer	CCC(=O)NC1=C(C=CC(=C1)N[C@@H](C)C(=O)OC)N=NC2=C(C=C(C=C2)[N+](=O)[O-])Cl	FALSE	missing stereochemistry	InChI=1S/C19H20ClN5O5/c1-4-18(26)22-17-9-12(21-11(2)19(27)30-3)5-7-16(17)24-23-15-8-6-13(25(28)29)10-14(15)20/h5-11,21H,4H2,1-3H3,(H,22,26)	InChI=1S/C19H20ClN5O5/c1-4-18(26)22-17-9-12(21-11(2)19(27)30-3)5-7-16(17)24-23-15-8-6-13(25(28)29)10-14(15)20/h5-11,21H,4H2,1-3H3,(H,22,26)/b24-23+/t11-/m0/s1	InChI=1S/C19H20ClN5O5/c1-4-18(26)22-17-9-12(21-11(2)19(27)30-3)5-7-16(17)24-23-15-8-6-13(25(28)29)10-14(15)20/h5-11,21H,4H2,1-3H3,(H,22,26)/t11-/m0/s1	FALSE	FALSE	N(C(CC)=O)C1=C(N=NC2=C(Cl)C=C(N(=O)=O)C=C2)C=CC(N[C@H](C(OC)=O)C)=C1	InChI=1S/C19H20ClN5O5/c1-4-18(26)22-17-9-12(21-11(2)19(27)30-3)5-7-16(17)24-23-15-8-6-13(25(28)29)10-14(15)20/h5-11,21H,4H2,1-3H3,(H,22,26)/t11-/m0/s1	FALSE
13062	100.103.111	dimethyl[2S,2S']-6,6,6'6'-tetramethoxy-2,2'-[N,N'-bis(trifluoracetyl)-S,S'-bi(L-homocysteinyl) diimino]dihexanoate	-					432-860-1	255387-46-3	no	organic	mono-constituent substance	NONS	Tonnage data confidential	[C@H](C(N[C@@H](CCCC(OC)OC)C(OC)=O)=O)(NC(C(F)(F)F)=O)CCSSCC[C@@H](C(N[C@@H](CCCC(OC)OC)C(OC)=O)=O)NC(C(F)(F)F)=O		COC(CCCC(NC(=O)C(CCSSCCC(NC(=O)C(F)(F)F)C(=O)NC(CCCC(OC)OC)C(=O)OC)NC(=O)C(F)(F)F)C(=O)OC)OC	COC(CCCC(NC(=O)C(CCSSCCC(NC(=O)C(F)(F)F)C(=O)NC(CCCC(OC)OC)C(=O)OC)NC(=O)C(F)(F)F)C(=O)OC)OC	TRUE						missing stereochemistry	InChI=1S/C30H48F6N4O12S2/c1-47-21(48-2)11-7-9-19(25(43)51-5)37-23(41)17(39-27(45)29(31,32)33)13-15-53-54-16-14-18(40-28(46)30(34,35)36)24(42)38-20(26(44)52-6)10-8-12-22(49-3)50-4/h17-22H,7-16H2,1-6H3,(H,37,41)(H,38,42)(H,39,45)(H,40,46)					[C@H](C(N[C@@H](CCCC(OC)OC)C(OC)=O)=O)(NC(C(F)(F)F)=O)CCSSCC[C@@H](C(N[C@@H](CCCC(OC)OC)C(OC)=O)=O)NC(C(F)(F)F)=O	InChI=1S/C30H48F6N4O12S2/c1-47-21(48-2)11-7-9-19(25(43)51-5)37-23(41)17(39-27(45)29(31,32)33)13-15-53-54-16-14-18(40-28(46)30(34,35)36)24(42)38-20(26(44)52-6)10-8-12-22(49-3)50-4/h17-22H,7-16H2,1-6H3,(H,37,41)(H,38,42)(H,39,45)(H,40,46)/t17-,18-,19-,20-/m0/s1	FALSE
4781	100.100.835	(9S)-9-amino-9-deoxyerythromycin	-					406-790-7	26116-56-3	no	organic	mono-constituent substance	NONS	Tonnage data confidential	CC[C@H]1OC(=O)[C@H](C)[C@@H](O[C@H]2C[C@@](C)(OC)[C@@H](O)[C@H](C)O2)[C@H](C)[C@@H](O[C@@H]2O[C@H](C)C[C@@H]([C@H]2O)N(C)C)[C@](C)(O)C[C@@H](C)[C@H](N)[C@H](C)[C@@H](O)[C@]1(C)O		CCC1OC(=O)C(C)C(OC2CC(C)(OC)C(O)C(C)O2)C(C)C(OC2OC(C)CC(C2O)N(C)C)C(C)(O)CC(C)C(N)C(C)C(O)C1(C)O	CCC1OC(=O)C(C)C(OC2CC(C)(OC)C(O)C(C)O2)C(C)C(OC2OC(C)CC(C2O)N(C)C)C(C)(O)CC(C)C(N)C(C)C(O)C1(C)O	TRUE	DTXCID40103241	CC[C@H]1OC(=O)[C@H](C)[C@@H](O[C@H]2C[C@@](C)(OC)[C@@H](O)[C@H](C)O2)[C@H](C)[C@@H](O[C@@H]2O[C@H](C)C[C@@H]([C@H]2O)N(C)C)[C@](C)(O)C[C@@H](C)[C@H](N)[C@H](C)[C@@H](O)[C@]1(C)O	FALSE	CC[C@@H]1[C@@]([C@@H]([C@H]([C@H]([C@@H](C[C@@]([C@@H]([C@H]([C@@H]([C@H](C(=O)O1)C)O[C@H]2C[C@@]([C@H]([C@@H](O2)C)O)(C)OC)C)O[C@H]3[C@@H]([C@H](C[C@H](O3)C)N(C)C)O)(C)O)C)N)C)O)(C)O	FALSE	missing stereochemistry	InChI=1S/C37H70N2O12/c1-14-25-37(10,45)30(41)20(4)27(38)18(2)16-35(8,44)32(51-34-28(40)24(39(11)12)15-19(3)47-34)21(5)29(22(6)33(43)49-25)50-26-17-36(9,46-13)31(42)23(7)48-26/h18-32,34,40-42,44-45H,14-17,38H2,1-13H3	InChI=1S/C37H70N2O12/c1-14-25-37(10,45)30(41)20(4)27(38)18(2)16-35(8,44)32(51-34-28(40)24(39(11)12)15-19(3)47-34)21(5)29(22(6)33(43)49-25)50-26-17-36(9,46-13)31(42)23(7)48-26/h18-32,34,40-42,44-45H,14-17,38H2,1-13H3/t18-,19-,20+,21+,22-,23+,24+,25-,26+,27+,28-,29+,30-,31+,32-,34+,35-,36-,37-/m1/s1	InChI=1S/C37H70N2O12/c1-14-25-37(10,45)30(41)20(4)27(38)18(2)16-35(8,44)32(51-34-28(40)24(39(11)12)15-19(3)47-34)21(5)29(22(6)33(43)49-25)50-26-17-36(9,46-13)31(42)23(7)48-26/h18-32,34,40-42,44-45H,14-17,38H2,1-13H3/t18-,19-,20+,21+,22-,23+,24+,25-,26+,27+,28-,29+,30-,31+,32-,34+,35-,36-,37-/m1/s1	FALSE	FALSE
4936	100.101.748	4-acetyloxy-5β,20-epoxy-1,2α,4,7β,10β,13α-hexahydroxy-9-oxotax-11-en-2-yl benzoate	-					418-680-6	32981-86-5	no	organic	mono-constituent substance	NONS	Tonnage data confidential	[H][C@@]12C[C@H](O)[C@@]3(C)C(=O)[C@H](O)C4=C(C)[C@@H](O)C[C@@](O)([C@@H](OC(=O)C5=CC=CC=C5)[C@]3([H])[C@@]1(CO2)OC(C)=O)C4(C)C		[H][C@]1(O)C[C@@]2(O)[C@@H](OC(=O)C3=CC=CC=C3)[C@]3([H])[C@@]4(COC4C[C@H](O)[C@@]3(C)C(=O)[C@H](O)C(=C1C)C2(C)C)OC(C)=O	[H][C@]1(O)C[C@@]2(O)[C@@H](OC(=O)C3=CC=CC=C3)[C@]3([H])[C@@]4(COC4C[C@H](O)[C@@]3(C)C(=O)[C@H](O)C(=C1C)C2(C)C)OC(C)=O	TRUE		[H][C@@]12C[C@H](O)[C@@]3(C)C(=O)[C@H](O)C4=C(C)[C@@H](O)C[C@@](O)([C@@H](OC(=O)C5=CC=CC=C5)[C@]3([H])[C@@]1(CO2)OC(C)=O)C4(C)C	FALSE	CC1=C2[C@H](C(=O)[C@@]3([C@H](C[C@@H]4[C@]([C@H]3[C@@H]([C@@](C2(C)C)(C[C@@H]1O)O)OC(=O)C5=CC=CC=C5)(CO4)OC(=O)C)O)C)O	FALSE	missing stereochemistry	InChI=1S/C29H36O10/c1-14-17(31)12-29(36)24(38-25(35)16-9-7-6-8-10-16)22-27(5,23(34)21(33)20(14)26(29,3)4)18(32)11-19-28(22,13-37-19)39-15(2)30/h6-10,17-19,21-22,24,31-33,36H,11-13H2,1-5H3/t17-,18-,19?,21+,22-,24-,27+,28-,29+/m0/s1	InChI=1S/C29H36O10/c1-14-17(31)12-29(36)24(38-25(35)16-9-7-6-8-10-16)22-27(5,23(34)21(33)20(14)26(29,3)4)18(32)11-19-28(22,13-37-19)39-15(2)30/h6-10,17-19,21-22,24,31-33,36H,11-13H2,1-5H3/t17-,18-,19+,21+,22-,24-,27+,28-,29+/m0/s1	InChI=1S/C29H36O10/c1-14-17(31)12-29(36)24(38-25(35)16-9-7-6-8-10-16)22-27(5,23(34)21(33)20(14)26(29,3)4)18(32)11-19-28(22,13-37-19)39-15(2)30/h6-10,17-19,21-22,24,31-33,36H,11-13H2,1-5H3/t17-,18-,19+,21+,22-,24-,27+,28-,29+/m0/s1	FALSE	FALSE
2656	100.101.197	(1S,3S,5R,6R)-(4-nitrophenylmethyl)-1-dioxo-6-phenylacetamido-penam-3-carboxylate	-					412-670-5	54275-93-3	no	organic	mono-constituent substance	NONS	Tonnage data confidential	N(C(CC1=CC=CC=C1)=O)[C@H]2[C@@]3(N([C@@H](C(OCC4=CC=C(N(=O)=O)C=C4)=O)C(C)(C)[S@@]3=O)C2=O)[H]		[H]C1(NC(=O)CC2=CC=CC=C2)C(=O)N2C(C(=O)OCC3=CC=C(C=C3)N(=O)=O)C(C)(C)S(=O)C12[H]	[H]C1(NC(=O)CC2=CC=CC=C2)C(=O)N2C(C(=O)OCC3=CC=C(C=C3)N(=O)=O)C(C)(C)S(=O)C12[H]	TRUE						missing stereochemistry	InChI=1S/C23H23N3O7S/c1-23(2)19(22(29)33-13-15-8-10-16(11-9-15)26(30)31)25-20(28)18(21(25)34(23)32)24-17(27)12-14-6-4-3-5-7-14/h3-11,18-19,21H,12-13H2,1-2H3,(H,24,27)					N(C(CC1=CC=CC=C1)=O)[C@H]2[C@@]3(N([C@@H](C(OCC4=CC=C(N(=O)=O)C=C4)=O)C(C)(C)[S@@]3=O)C2=O)[H]	InChI=1S/C23H23N3O7S/c1-23(2)19(22(29)33-13-15-8-10-16(11-9-15)26(30)31)25-20(28)18(21(25)34(23)32)24-17(27)12-14-6-4-3-5-7-14/h3-11,18-19,21H,12-13H2,1-2H3,(H,24,27)/t18-,19+,21-,34-/m1/s1	FALSE
4433	100.102.567	cyclic 3-(1,2-ethanediylacetale)-estra-5(10),9(11)-diene-3,17-dione	-					427-230-8	5571-36-8	no	organic	mono-constituent substance	NONS	Tonnage data confidential	C[C@]12CC=C3[C@@H](CCC4=C3CCC3(C4)OCCO3)[C@@H]1CCC2=O		[H][C@@]12CCC3=C(CCC4(C3)OCCO4)C1=CC[C@@]1(C)C2CCC1=O	[H][C@@]12CCC3=C(CCC4(C3)OCCO4)C1=CC[C@@]1(C)C2CCC1=O	TRUE	DTXCID60378575	C[C@]12CC=C3[C@@H](CCC4=C3CCC3(C4)OCCO3)[C@@H]1CCC2=O	FALSE	C[C@]12CC=C3[C@H]([C@@H]1CCC2=O)CCC4=C3CCC5(C4)OCCO5	FALSE	missing stereochemistry	InChI=1S/C20H26O3/c1-19-8-6-15-14-7-9-20(22-10-11-23-20)12-13(14)2-3-16(15)17(19)4-5-18(19)21/h6,16-17H,2-5,7-12H2,1H3/t16-,17?,19+/m1/s1	InChI=1S/C20H26O3/c1-19-8-6-15-14-7-9-20(22-10-11-23-20)12-13(14)2-3-16(15)17(19)4-5-18(19)21/h6,16-17H,2-5,7-12H2,1H3/t16-,17+,19+/m1/s1	InChI=1S/C20H26O3/c1-19-8-6-15-14-7-9-20(22-10-11-23-20)12-13(14)2-3-16(15)17(19)4-5-18(19)21/h6,16-17H,2-5,7-12H2,1H3/t16-,17+,19+/m1/s1	FALSE	FALSE
11061	100.009.059	α-hydroxy-β,β-dimethyl-γ-butyrolactone	-					209-963-3	599-04-2	no	organic	mono-constituent substance	FULL	≥ 100 to < 1000 tonnes	CC1(C)COC(=O)[C@@H]1O		CC1(C)COC(=O)C1O	CC1(C)COC(=O)C1O	TRUE	DTXCID801079767	CC1(C)COC(=O)[C@@H]1O	FALSE	CC1(COC(=O)[C@@H]1O)C	OK	missing stereochemistry	InChI=1S/C6H10O3/c1-6(2)3-9-5(8)4(6)7/h4,7H,3H2,1-2H3	InChI=1S/C6H10O3/c1-6(2)3-9-5(8)4(6)7/h4,7H,3H2,1-2H3/t4-/m0/s1	InChI=1S/C6H10O3/c1-6(2)3-9-5(8)4(6)7/h4,7H,3H2,1-2H3/t4-/m0/s1	FALSE	FALSE
28040	100.100.901	A mixture of: ethyl exo-tricyclo[5.2.1.02,6]decane-endo-2-carboxylate; ethyl-endo-tricyclo[5.2.1.02,6]decane-exo-2-carboxylate	-					407-520-0	80657-64-3	no	organic	mono-constituent substance	FULL	≥ 10 to < 100 tonnes	CCOC(=O)[C@@]12CCC[C@@H]1[C@@H]1CC[C@H]2C1		CCOC(=O)C12CCCC1C1CCC2C1	CCOC(=O)C12CCCC1C1CCC2C1	TRUE	DTXCID1031125	CCOC(=O)[C@@]12CCC[C@@H]1[C@@H]1CC[C@H]2C1	FALSE	CCOC(=O)[C@@]12CCC[C@@H]1[C@@H]3CC[C@H]2C3	FALSE	missing stereochemistry	InChI=1S/C13H20O2/c1-2-15-12(14)13-7-3-4-11(13)9-5-6-10(13)8-9/h9-11H,2-8H2,1H3	InChI=1S/C13H20O2/c1-2-15-12(14)13-7-3-4-11(13)9-5-6-10(13)8-9/h9-11H,2-8H2,1H3/t9-,10+,11-,13-/m1/s1	InChI=1S/C13H20O2/c1-2-15-12(14)13-7-3-4-11(13)9-5-6-10(13)8-9/h9-11H,2-8H2,1H3/t9-,10+,11-,13-/m1/s1	FALSE	FALSE
32138	100.020.145	Methyl L-threoninate	-					222-158-1	3373-59-9	no	organic	mono-constituent substance	FULL	≥ 10 to < 100 tonnes	C[C@H]([C@@H](C(=O)OC)N)O		COC(=O)[C@@H](N)C(C)O	COC(=O)[C@@H](N)C(C)O	TRUE	DTXCID80203037	COC(=O)C(N)C(C)O	FALSE	C[C@H]([C@@H](C(=O)OC)N)O	OK	missing stereochemistry	InChI=1S/C5H11NO3/c1-3(7)4(6)5(8)9-2/h3-4,7H,6H2,1-2H3/t3?,4-/m0/s1	InChI=1S/C5H11NO3/c1-3(7)4(6)5(8)9-2/h3-4,7H,6H2,1-2H3	InChI=1S/C5H11NO3/c1-3(7)4(6)5(8)9-2/h3-4,7H,6H2,1-2H3/t3-,4+/m1/s1	FALSE	FALSE
23586	100.234.148	4-trans-(3-penten-1-yl)-4'-trans-propyl-1,1'-bicyclohexyl	CCCC1CCC(CC1)C1CCC(CC\C=C\C)CC1	InChI=1S/C20H36/c1-3-5-6-8-18-11-15-20(16-12-18)19-13-9-17(7-4-2)10-14-19/h3,5,17-20H,4,6-16H2,1-2H3/b5-3+		TRUE		806-827-0	105351-42-6	no	organic	mono-constituent substance	FULL	≥ 0 to < 10 tonnes			CCCC1CCC(CC1)C1CCC(CC\C=C\C)CC1	CCCC1CCC(CC1)C1CCC(CC\C=C\C)CC1	TRUE						missing stereochemistry	InChI=1S/C20H36/c1-3-5-6-8-18-11-15-20(16-12-18)19-13-9-17(7-4-2)10-14-19/h3,5,17-20H,4,6-16H2,1-2H3/b5-3+					C(C/C=C/C)[C@H]1CC[C@@](CC1)([C@]2(CC[C@H](CCC)CC2)[H])[H]	InChI=1S/C20H36/c1-3-5-6-8-18-11-15-20(16-12-18)19-13-9-17(7-4-2)10-14-19/h3,5,17-20H,4,6-16H2,1-2H3/b5-3+/t17-,18-,19-,20-	FALSE
5023	100.101.789	A mixture of: (+)-13-ethyl-1,6,7,8,9,10,11,12,13,14,15,16-dodecahydro-2H-cyclopenta[a]phenanthrene-3,17-dione; (-)-13-ethyl-1,6,7,8,9,10,11,12,13,14,15,16-dodecahydro-2H-cyclopenta[a]phenanthrene-3,17-dione	CCC12CCC3C(CCC4=CC(=O)CCC34)C1CCC2=O.CCC12CCC3C(CCC4=CC(=O)CCC34)C1CCC2=O	InChI=1S/2C19H26O2/c2*1-2-19-10-9-15-14-6-4-13(20)11-12(14)3-5-16(15)17(19)7-8-18(19)21/h2*11,14-17H,2-10H2,1H3	FALSE	TRUE		419-120-3	23477-67-0	no	organic	mono-constituent substance	NONS	Tonnage data confidential	C(C)[C@@]12[C@]([C@]3([C@](CC1)([C@@]4(C(CC3)=CC(=O)CC4)[H])[H])[H])(CCC2=O)[H]	InChI=1S/C19H26O2/c1-2-19-10-9-15-14-6-4-13(20)11-12(14)3-5-16(15)17(19)7-8-18(19)21/h11,14-17H,2-10H2,1H3/t14-,15+,16+,17-,19-/m0/s1	CCC12CCC3C(CCC4=CC(=O)CCC34)C1CCC2=O	CCC12CCC3C(CCC4=CC(=O)CCC34)C1CCC2=O	TRUE				CC[C@]12CC[C@H]3[C@H]([C@@H]1CCC2=O)CCC4=CC(=O)CC[C@H]34	FALSE	missing stereochemistry	InChI=1S/C19H26O2/c1-2-19-10-9-15-14-6-4-13(20)11-12(14)3-5-16(15)17(19)7-8-18(19)21/h11,14-17H,2-10H2,1H3		InChI=1S/C19H26O2/c1-2-19-10-9-15-14-6-4-13(20)11-12(14)3-5-16(15)17(19)7-8-18(19)21/h11,14-17H,2-10H2,1H3/t14-,15+,16+,17-,19-/m0/s1		FALSE	C(C)[C@@]12[C@]([C@]3([C@](CC1)([C@@]4(C(CC3)=CC(=O)CC4)[H])[H])[H])(CCC2=O)[H]
12878	100.101.501	trans-4-phenyl-L-proline	OC(=O)[C@H]1C[C@@H](CN1)C1=CC=CC=C1	InChI=1S/C11H13NO2/c13-11(14)10-6-9(7-12-10)8-4-2-1-3-5-8/h1-5,9-10,12H,6-7H2,(H,13,14)/t9-,10+/m0/s1	FALSE	FALSE	deviating stereochemistry	416-020-1	96314-26-0	no	organic	mono-constituent substance	NONS	Tonnage data confidential	OC(=O)[C@@H]1C[C@H](CN1)C1=CC=CC=C1	InChI=1S/C11H13NO2/c13-11(14)10-6-9(7-12-10)8-4-2-1-3-5-8/h1-5,9-10,12H,6-7H2,(H,13,14)/t9-,10+/m1/s1	OC(=O)C1CC(CN1)C1=CC=CC=C1	OC(=O)C1CC(CN1)C1=CC=CC=C1	TRUE	DTXCID90461106	OC(=O)[C@@H]1C[C@H](CN1)C1=CC=CC=C1	FALSE	C1[C@H](CN[C@@H]1C(=O)O)C2=CC=CC=C2	FALSE	missing stereochemistry	InChI=1S/C11H13NO2/c13-11(14)10-6-9(7-12-10)8-4-2-1-3-5-8/h1-5,9-10,12H,6-7H2,(H,13,14)	InChI=1S/C11H13NO2/c13-11(14)10-6-9(7-12-10)8-4-2-1-3-5-8/h1-5,9-10,12H,6-7H2,(H,13,14)/t9-,10+/m1/s1	InChI=1S/C11H13NO2/c13-11(14)10-6-9(7-12-10)8-4-2-1-3-5-8/h1-5,9-10,12H,6-7H2,(H,13,14)/t9-,10+/m1/s1	FALSE	FALSE
2946	100.102.527	1-(4-(trans-4-heptylcyclohexyl)phenyl)ethane	-	InChI=1S/C21H34/c1-3-5-6-7-8-9-19-12-16-21(17-13-19)20-14-10-18(4-2)11-15-20/h10-11,14-15,19,21H,3-9,12-13,16-17H2,1-2H3/t19-,21-	FALSE	FALSE	inconsistent structure	426-820-2	78531-60-9	no	organic	mono-constituent substance	NONS	Cease manufacture	C(CCCCCC)[C@H]1CC[C@@H](CC1)C2=CC=C(C(C)=O)C=C2	InChI=1S/C21H32O/c1-3-4-5-6-7-8-18-9-11-20(12-10-18)21-15-13-19(14-16-21)17(2)22/h13-16,18,20H,3-12H2,1-2H3/t18-,20-	CCCCCCCC1CC[C@@H](CC1)C1=CC=C(C=C1)C(C)=O	CCCCCCCC1CC[C@@H](CC1)C1=CC=C(C=C1)C(C)=O	TRUE						missing stereochemistry	InChI=1S/C21H32O/c1-3-4-5-6-7-8-18-9-11-20(12-10-18)21-15-13-19(14-16-21)17(2)22/h13-16,18,20H,3-12H2,1-2H3/t18?,20-					C(CCCCCC)[C@H]1CC[C@@H](CC1)C2=CC=C(C(C)=O)C=C2	InChI=1S/C21H32O/c1-3-4-5-6-7-8-18-9-11-20(12-10-18)21-15-13-19(14-16-21)17(2)22/h13-16,18,20H,3-12H2,1-2H3/t18-,20-	FALSE
26467	100.004.316	Pleuromulin	C[C@H]1CC[C@]23CCC(=O)[C@H]2[C@@]1(C)[C@@H](C[C@](C)(C=C)[C@@H](O)[C@@H]3C)OC(=O)CO	InChI=1S/C22H34O5/c1-6-20(4)11-16(27-17(25)12-23)21(5)13(2)7-9-22(14(3)19(20)26)10-8-15(24)18(21)22/h6,13-14,16,18-19,23,26H,1,7-12H2,2-5H3/t13-,14-,16+,18-,19-,20-,21+,22+/m0/s1	FALSE	FALSE	deviating stereochemistry	204-747-5	125-65-5	no	organic	mono-constituent substance	FULL	≥ 0 to < 10 tonnes	[H][C@@]12C(=O)CC[C@]11CC[C@@H](C)[C@@]2(C)[C@@H](C[C@@](C)(C=C)[C@@H](O)[C@@H]1C)OC(=O)CO	InChI=1S/C22H34O5/c1-6-20(4)11-16(27-17(25)12-23)21(5)13(2)7-9-22(14(3)19(20)26)10-8-15(24)18(21)22/h6,13-14,16,18-19,23,26H,1,7-12H2,2-5H3/t13-,14+,16-,18+,19+,20-,21+,22+/m1/s1	CC1CCC23CCC(=O)C2C1(C)C(CC(C)(C=C)C(O)C3C)OC(=O)CO	CC1CCC23CCC(=O)C2C1(C)C(CC(C)(C=C)C(O)C3C)OC(=O)CO	TRUE	DTXCID501079582	[H][C@@]12C(=O)CC[C@]11CC[C@@H](C)[C@@]2(C)[C@@H](C[C@@](C)(C=C)[C@@H](O)[C@@H]1C)OC(=O)CO		C[C@@H]1CCC23CCC(=O)[C@H]2C1([C@@H](C[C@@]([C@H]([C@@H]3C)O)(C)C=C)OC(=O)CO)C		missing stereochemistry	InChI=1S/C22H34O5/c1-6-20(4)11-16(27-17(25)12-23)21(5)13(2)7-9-22(14(3)19(20)26)10-8-15(24)18(21)22/h6,13-14,16,18-19,23,26H,1,7-12H2,2-5H3	InChI=1S/C22H34O5/c1-6-20(4)11-16(27-17(25)12-23)21(5)13(2)7-9-22(14(3)19(20)26)10-8-15(24)18(21)22/h6,13-14,16,18-19,23,26H,1,7-12H2,2-5H3/t13-,14+,16-,18+,19+,20-,21+,22+/m1/s1	InChI=1S/C22H34O5/c1-6-20(4)11-16(27-17(25)12-23)21(5)13(2)7-9-22(14(3)19(20)26)10-8-15(24)18(21)22/h6,13-14,16,18-19,23,26H,1,7-12H2,2-5H3/t13-,14+,16-,18+,19+,20-,21?,22?/m1/s1	FALSE	FALSE
24097	100.108.183	1-Ethoxy-2,3-difluoro-4-[trans-4-(trans-4-propylcyclohexyl)-cyclohexyl]-benzene	-	InChI=1S/C23H34F2O/c1-3-5-16-6-8-17(9-7-16)18-10-12-19(13-11-18)20-14-15-21(26-4-2)23(25)22(20)24/h14-19H,3-13H2,1-2H3/t16-,17?,18-,19-	FALSE	FALSE	missing stereochemistry	602-941-8	123560-48-5	no	organic	mono-constituent substance	FULL	≥ 0 to < 10 tonnes	FC1=C(C=CC(OCC)=C1F)[C@]2(CC[C@@](CC2)([C@]3(CC[C@H](CCC)CC3)[H])[H])[H]	InChI=1S/C23H34F2O/c1-3-5-16-6-8-17(9-7-16)18-10-12-19(13-11-18)20-14-15-21(26-4-2)23(25)22(20)24/h14-19H,3-13H2,1-2H3/t16-,17-,18-,19-	CCCC1CCC(CC1)C1CCC(CC1)C1=CC=C(OCC)C(F)=C1F	CCCC1CCC(CC1)C1CCC(CC1)C1=CC=C(OCC)C(F)=C1F	TRUE		CCCC1CCC(CC1)C1CCC(CC1)C1=C(F)C(F)=C(OCC)C=C1	FALSE	CCCC1CCC(CC1)C2CCC(CC2)C3=C(C(=C(C=C3)OCC)F)F	FALSE	missing stereochemistry	InChI=1S/C23H34F2O/c1-3-5-16-6-8-17(9-7-16)18-10-12-19(13-11-18)20-14-15-21(26-4-2)23(25)22(20)24/h14-19H,3-13H2,1-2H3	InChI=1S/C23H34F2O/c1-3-5-16-6-8-17(9-7-16)18-10-12-19(13-11-18)20-14-15-21(26-4-2)23(25)22(20)24/h14-19H,3-13H2,1-2H3	InChI=1S/C23H34F2O/c1-3-5-16-6-8-17(9-7-16)18-10-12-19(13-11-18)20-14-15-21(26-4-2)23(25)22(20)24/h14-19H,3-13H2,1-2H3	TRUE	TRUE	FC1=C(C=CC(OCC)=C1F)[C@]2(CC[C@@](CC2)([C@]3(CC[C@H](CCC)CC3)[H])[H])[H]	InChI=1S/C23H34F2O/c1-3-5-16-6-8-17(9-7-16)18-10-12-19(13-11-18)20-14-15-21(26-4-2)23(25)22(20)24/h14-19H,3-13H2,1-2H3/t16-,17-,18-,19-	FALSE
21362	100.127.590	2,3-Difluor-1-propoxy-4-[trans-4-(trans-4-propylcyclohexyl)- cyclohexyl]-benzene	-	InChI=1S/C24H36F2O/c1-3-5-17-6-8-18(9-7-17)19-10-12-20(13-11-19)21-14-15-22(27-16-4-2)24(26)23(21)25/h14-15,17-20H,3-13,16H2,1-2H3/t17-,18?,19-,20-	FALSE	FALSE	missing stereochemistry	610-336-5	473257-14-6	no	organic	mono-constituent substance	FULL	≥ 1 to < 10 tonnes	[H][C@]1(CCC)CC[C@@]([H])(CC1)[C@@]1([H])CC[C@@]([H])(CC1)C1=CC=C(OCCC)C(F)=C1F	InChI=1S/C24H36F2O/c1-3-5-17-6-8-18(9-7-17)19-10-12-20(13-11-19)21-14-15-22(27-16-4-2)24(26)23(21)25/h14-15,17-20H,3-13,16H2,1-2H3/t17-,18-,19-,20-	CCCOC1=CC=C([C@H]2CC[C@@H](CC2)C2CCC(CCC)CC2)C(F)=C1F	CCCOC1=CC=C([C@H]2CC[C@@H](CC2)C2CCC(CCC)CC2)C(F)=C1F	TRUE	DTXCID401477341	[H][C@]1(CCC)CC[C@@]([H])(CC1)[C@@]1([H])CC[C@@]([H])(CC1)C1=CC=C(OCCC)C(F)=C1F	FALSE	CCCC1CCC(CC1)C2CCC(CC2)C3=C(C(=C(C=C3)OCCC)F)F	FALSE	missing stereochemistry	InChI=1S/C24H36F2O/c1-3-5-17-6-8-18(9-7-17)19-10-12-20(13-11-19)21-14-15-22(27-16-4-2)24(26)23(21)25/h14-15,17-20H,3-13,16H2,1-2H3/t17?,18?,19-,20-	InChI=1S/C24H36F2O/c1-3-5-17-6-8-18(9-7-17)19-10-12-20(13-11-19)21-14-15-22(27-16-4-2)24(26)23(21)25/h14-15,17-20H,3-13,16H2,1-2H3/t17-,18-,19-,20-	InChI=1S/C24H36F2O/c1-3-5-17-6-8-18(9-7-17)19-10-12-20(13-11-19)21-14-15-22(27-16-4-2)24(26)23(21)25/h14-15,17-20H,3-13,16H2,1-2H3	FALSE	FALSE
21378	100.127.686	4-[trans-4-(trans-4-butylcyclohexyl)-cyclohexyl]-1-ethoxy-2, 3-difluorobenzene	-	InChI=1S/C24H36F2O/c1-3-5-6-17-7-9-18(10-8-17)19-11-13-20(14-12-19)21-15-16-22(27-4-2)24(26)23(21)25/h15-20H,3-14H2,1-2H3/t17-,18?,19-,20-	FALSE	FALSE	missing stereochemistry	610-337-0	473257-15-7	no	organic	mono-constituent substance	FULL	≥ 1 to < 10 tonnes	FC1=C(C=CC(OCC)=C1F)[C@]2(CC[C@@](CC2)([C@]3(CC[C@H](CCCC)CC3)[H])[H])[H]	InChI=1S/C24H36F2O/c1-3-5-6-17-7-9-18(10-8-17)19-11-13-20(14-12-19)21-15-16-22(27-4-2)24(26)23(21)25/h15-20H,3-14H2,1-2H3/t17-,18-,19-,20-	CCCCC1CCC(CC1)[C@H]1CC[C@@H](CC1)C1=CC=C(OCC)C(F)=C1F	CCCCC1CCC(CC1)[C@H]1CC[C@@H](CC1)C1=CC=C(OCC)C(F)=C1F	TRUE	DTXCID40656045	CCCCC1CCC(CC1)C1CCC(CC1)C1=C(F)C(F)=C(OCC)C=C1	FALSE	CCCCC1CCC(CC1)C2CCC(CC2)C3=C(C(=C(C=C3)OCC)F)F	FALSE	missing stereochemistry	InChI=1S/C24H36F2O/c1-3-5-6-17-7-9-18(10-8-17)19-11-13-20(14-12-19)21-15-16-22(27-4-2)24(26)23(21)25/h15-20H,3-14H2,1-2H3/t17?,18?,19-,20-	InChI=1S/C24H36F2O/c1-3-5-6-17-7-9-18(10-8-17)19-11-13-20(14-12-19)21-15-16-22(27-4-2)24(26)23(21)25/h15-20H,3-14H2,1-2H3	InChI=1S/C24H36F2O/c1-3-5-6-17-7-9-18(10-8-17)19-11-13-20(14-12-19)21-15-16-22(27-4-2)24(26)23(21)25/h15-20H,3-14H2,1-2H3	FALSE	FALSE
26757	100.029.188	1,3,3-trimethylnorbornan-2-one	CC1(C)C2CCC(C)(C2)C1=O	InChI=1S/C10H16O/c1-9(2)7-4-5-10(3,6-7)8(9)11/h7H,4-6H2,1-3H3	FALSE	TRUE		232-107-5	7787-20-4	no	organic	mono-constituent substance	FULL	≥ 1 to < 10 tonnes	CC1(C)[C@H]2CC[C@](C)(C2)C1=O	InChI=1S/C10H16O/c1-9(2)7-4-5-10(3,6-7)8(9)11/h7H,4-6H2,1-3H3/t7-,10+/m0/s1	CC1(C)C2CCC(C)(C2)C1=O	CC1(C)C2CCC(C)(C2)C1=O	TRUE	DTXCID501023872	CC1(C)[C@H]2CC[C@](C)(C2)C1=O	FALSE	C[C@@]12CC[C@@H](C1)C(C2=O)(C)C	OK	missing stereochemistry	InChI=1S/C10H16O/c1-9(2)7-4-5-10(3,6-7)8(9)11/h7H,4-6H2,1-3H3	InChI=1S/C10H16O/c1-9(2)7-4-5-10(3,6-7)8(9)11/h7H,4-6H2,1-3H3/t7-,10+/m0/s1	InChI=1S/C10H16O/c1-9(2)7-4-5-10(3,6-7)8(9)11/h7H,4-6H2,1-3H3/t7-,10+/m0/s1	FALSE	FALSE
27677	100.030.884	p-menth-1-en-8-ol	CC1=CCC(CC1)C(C)(C)O	InChI=1S/C10H18O/c1-8-4-6-9(7-5-8)10(2,3)11/h4,9,11H,5-7H2,1-3H3	FALSE	TRUE		233-986-8	10482-56-1	no	organic	mono-constituent substance	FULL	≥ 10 to < 100 tonnes	CC1=CC[C@H](CC1)C(C)(C)O	InChI=1S/C10H18O/c1-8-4-6-9(7-5-8)10(2,3)11/h4,9,11H,5-7H2,1-3H3/t9-/m1/s1	CC1=CCC(CC1)C(C)(C)O	CC1=CCC(CC1)C(C)(C)O	TRUE	DTXCID2031245	CC1=CC[C@H](CC1)C(C)(C)O	FALSE	CC1=CC[C@H](CC1)C(C)(C)O	TRUE	missing stereochemistry	InChI=1S/C10H18O/c1-8-4-6-9(7-5-8)10(2,3)11/h4,9,11H,5-7H2,1-3H3	InChI=1S/C10H18O/c1-8-4-6-9(7-5-8)10(2,3)11/h4,9,11H,5-7H2,1-3H3/t9-/m1/s1	InChI=1S/C10H18O/c1-8-4-6-9(7-5-8)10(2,3)11/h4,9,11H,5-7H2,1-3H3/t9-/m1/s1	FALSE	FALSE
28384	100.012.607	3,5-diiodothyronine	NC(CC1=CC(I)=C(OC2=CC=C(O)C=C2)C(I)=C1)C(O)=O	InChI=1S/C15H13I2NO4/c16-11-5-8(7-13(18)15(20)21)6-12(17)14(11)22-10-3-1-9(19)2-4-10/h1-6,13,19H,7,18H2,(H,20,21)	FALSE	TRUE		213-867-7	1041-01-6	no	organic	mono-constituent substance	FULL	≥ 1 to < 10 tonnes	N[C@@H](CC1=CC(I)=C(OC2=CC=C(O)C=C2)C(I)=C1)C(O)=O	InChI=1S/C15H13I2NO4/c16-11-5-8(7-13(18)15(20)21)6-12(17)14(11)22-10-3-1-9(19)2-4-10/h1-6,13,19H,7,18H2,(H,20,21)/t13-/m0/s1	NC(CC1=CC(I)=C(OC2=CC=C(O)C=C2)C(I)=C1)C(O)=O	NC(CC1=CC(I)=C(OC2=CC=C(O)C=C2)C(I)=C1)C(O)=O	TRUE	DTXCID301474720	N[C@@H](CC1=CC(I)=C(OC2=CC=C(O)C=C2)C(I)=C1)C(O)=O	FALSE	C1=CC(=CC=C1O)OC2=C(C=C(C=C2I)C[C@@H](C(=O)O)N)I	OK	missing stereochemistry	InChI=1S/C15H13I2NO4/c16-11-5-8(7-13(18)15(20)21)6-12(17)14(11)22-10-3-1-9(19)2-4-10/h1-6,13,19H,7,18H2,(H,20,21)	InChI=1S/C15H13I2NO4/c16-11-5-8(7-13(18)15(20)21)6-12(17)14(11)22-10-3-1-9(19)2-4-10/h1-6,13,19H,7,18H2,(H,20,21)/t13-/m0/s1	InChI=1S/C15H13I2NO4/c16-11-5-8(7-13(18)15(20)21)6-12(17)14(11)22-10-3-1-9(19)2-4-10/h1-6,13,19H,7,18H2,(H,20,21)/t13-/m0/s1	FALSE	FALSE
9758	100.100.423	Exo-(+/-)-1-methyl-4-(1-methylethyl)-2-[(2-methylphenyl)methoxy]-7-oxabicyclo[2.2.1]heptane	CC(C)C12CCC(C)(O1)C(C2)OCC1=C(C)C=CC=C1	InChI=1S/C18H26O2/c1-13(2)18-10-9-17(4,20-18)16(11-18)19-12-15-8-6-5-7-14(15)3/h5-8,13,16H,9-12H2,1-4H3	FALSE	TRUE		402-410-9	87818-31-3	no	organic	mono-constituent substance	NONS	No longer valid	CC(C)[C@]12CC[C@](C)(O1)[C@@H](C2)OCC1=C(C)C=CC=C1	InChI=1S/C18H26O2/c1-13(2)18-10-9-17(4,20-18)16(11-18)19-12-15-8-6-5-7-14(15)3/h5-8,13,16H,9-12H2,1-4H3/t16-,17+,18-/m1/s1	CC(C)C12CCC(C)(O1)C(C2)OCC1=CC=CC=C1C	CC(C)C12CCC(C)(O1)C(C2)OCC1=CC=CC=C1C	TRUE	DTXCID60196478	CC(C)[C@]12CC[C@](C)(O1)[C@@H](C2)OCC1=C(C)C=CC=C1	FALSE	CC1=CC=CC=C1CO[C@@H]2C[C@]3(CC[C@@]2(O3)C)C(C)C	FALSE	missing stereochemistry	InChI=1S/C18H26O2/c1-13(2)18-10-9-17(4,20-18)16(11-18)19-12-15-8-6-5-7-14(15)3/h5-8,13,16H,9-12H2,1-4H3	InChI=1S/C18H26O2/c1-13(2)18-10-9-17(4,20-18)16(11-18)19-12-15-8-6-5-7-14(15)3/h5-8,13,16H,9-12H2,1-4H3/t16-,17+,18-/m1/s1	InChI=1S/C18H26O2/c1-13(2)18-10-9-17(4,20-18)16(11-18)19-12-15-8-6-5-7-14(15)3/h5-8,13,16H,9-12H2,1-4H3/t16-,17+,18-/m1/s1	FALSE	FALSE
14876	100.000.265	Aspartic acid	NC(CC(O)=O)C(O)=O	InChI=1S/C4H7NO4/c5-2(4(8)9)1-3(6)7/h2H,1,5H2,(H,6,7)(H,8,9)	FALSE	TRUE		200-291-6	56-84-8	no	organic	mono-constituent substance	FULL	≥ 1000 to < 10000 tonnes	N[C@@H](CC(O)=O)C(O)=O	InChI=1S/C4H7NO4/c5-2(4(8)9)1-3(6)7/h2H,1,5H2,(H,6,7)(H,8,9)/t2-/m0/s1	NC(CC(O)=O)C(O)=O	NC(CC(O)=O)C(O)=O	TRUE	DTXCID402621	N[C@@H](CC(O)=O)C(O)=O	FALSE	C([C@@H](C(=O)O)N)C(=O)O	FALSE	missing stereochemistry	InChI=1S/C4H7NO4/c5-2(4(8)9)1-3(6)7/h2H,1,5H2,(H,6,7)(H,8,9)	InChI=1S/C4H7NO4/c5-2(4(8)9)1-3(6)7/h2H,1,5H2,(H,6,7)(H,8,9)/t2-/m0/s1	InChI=1S/C4H7NO4/c5-2(4(8)9)1-3(6)7/h2H,1,5H2,(H,6,7)(H,8,9)/t2-/m0/s1	FALSE	FALSE
5911	100.000.270	Cystine	NC(CSSCC(N)C(O)=O)C(O)=O	InChI=1S/C6H12N2O4S2/c7-3(5(9)10)1-13-14-2-4(8)6(11)12/h3-4H,1-2,7-8H2,(H,9,10)(H,11,12)	FALSE	TRUE		200-296-3	56-89-3	no	organic	mono-constituent substance	FULL	≥ 10 to < 100 tonnes	N[C@@H](CSSC[C@H](N)C(O)=O)C(O)=O	InChI=1S/C6H12N2O4S2/c7-3(5(9)10)1-13-14-2-4(8)6(11)12/h3-4H,1-2,7-8H2,(H,9,10)(H,11,12)/t3-,4-/m0/s1	NC(CSSCC(N)C(O)=O)C(O)=O	NC(CSSCC(N)C(O)=O)C(O)=O	TRUE	DTXCID0026418	N[C@@H](CSSC[C@H](N)C(O)=O)C(O)=O	FALSE	C([C@@H](C(=O)O)N)SSC[C@@H](C(=O)O)N	FALSE	missing stereochemistry	InChI=1S/C6H12N2O4S2/c7-3(5(9)10)1-13-14-2-4(8)6(11)12/h3-4H,1-2,7-8H2,(H,9,10)(H,11,12)	InChI=1S/C6H12N2O4S2/c7-3(5(9)10)1-13-14-2-4(8)6(11)12/h3-4H,1-2,7-8H2,(H,9,10)(H,11,12)/t3-,4-/m0/s1	InChI=1S/C6H12N2O4S2/c7-3(5(9)10)1-13-14-2-4(8)6(11)12/h3-4H,1-2,7-8H2,(H,9,10)(H,11,12)/t3-,4-/m0/s1	FALSE	FALSE
13725	100.000.738	Arginine	NC(CCCNC(N)=N)C(O)=O	InChI=1S/C6H14N4O2/c7-4(5(11)12)2-1-3-10-6(8)9/h4H,1-3,7H2,(H,11,12)(H4,8,9,10)	FALSE	TRUE		200-811-1	74-79-3	no	organic	mono-constituent substance	FULL	≥ 1000 to < 10000 tonnes	N[C@@H](CCCNC(N)=N)C(O)=O	InChI=1S/C6H14N4O2/c7-4(5(11)12)2-1-3-10-6(8)9/h4H,1-3,7H2,(H,11,12)(H4,8,9,10)/t4-/m0/s1	NC(CCCNC(N)=N)C(O)=O	NC(CCCNC(N)=N)C(O)=O	TRUE	DTXCID4021056	N[C@@H](CCCNC(N)=N)C(O)=O	FALSE	C(C[C@@H](C(=O)O)N)CN=C(N)N	Tautomer	missing stereochemistry	InChI=1S/C6H14N4O2/c7-4(5(11)12)2-1-3-10-6(8)9/h4H,1-3,7H2,(H,11,12)(H4,8,9,10)	InChI=1S/C6H14N4O2/c7-4(5(11)12)2-1-3-10-6(8)9/h4H,1-3,7H2,(H,11,12)(H4,8,9,10)/t4-/m0/s1	InChI=1S/C6H14N4O2/c7-4(5(11)12)2-1-3-10-6(8)9/h4H,1-3,7H2,(H,11,12)(H4,8,9,10)/t4-/m0/s1	FALSE	FALSE
16724	100.000.976	1,3,4,5-tetrahydroxycyclohexanecarboxylic acid	OC1CC(O)(CC(O)C1O)C(O)=O	InChI=1S/C7H12O6/c8-3-1-7(13,6(11)12)2-4(9)5(3)10/h3-5,8-10,13H,1-2H2,(H,11,12)	FALSE	TRUE		201-072-8	77-95-2	no	organic	mono-constituent substance	FULL	≥ 0 to < 10 tonnes	C(O)(=O)[C@]1(O)C[C@@H](O)[C@@H](O)[C@H](O)C1	InChI=1S/C7H12O6/c8-3-1-7(13,6(11)12)2-4(9)5(3)10/h3-5,8-10,13H,1-2H2,(H,11,12)/t3-,4-,5-,7+/m1/s1	OC1CC(O)(CC(O)C1O)C(O)=O	OC1CC(O)(CC(O)C1O)C(O)=O	TRUE	DTXCID001425279	[H][C@@]1(O)CC(O)(C[C@@]([H])(O)C1([H])O)C([O-])=O	FALSE	C1[C@H](C([C@@H](CC1(C(=O)O)O)O)O)O	FALSE	missing stereochemistry	InChI=1S/C7H12O6/c8-3-1-7(13,6(11)12)2-4(9)5(3)10/h3-5,8-10,13H,1-2H2,(H,11,12)	InChI=1S/C7H12O6/c8-3-1-7(13,6(11)12)2-4(9)5(3)10/h3-5,8-10,13H,1-2H2,(H,11,12)/p-1/t3-,4-,5?,7?/m1/s1	InChI=1S/C7H12O6/c8-3-1-7(13,6(11)12)2-4(9)5(3)10/h3-5,8-10,13H,1-2H2,(H,11,12)/t3-,4-,5?,7?/m1/s1	FALSE	FALSE
18416	100.001.622	Diethyl tartrate	CCOC(=O)C(O)C(O)C(=O)OCC	InChI=1S/C8H14O6/c1-3-13-7(11)5(9)6(10)8(12)14-4-2/h5-6,9-10H,3-4H2,1-2H3	FALSE	TRUE		201-783-3	87-91-2	no	organic	mono-constituent substance	FULL	≥ 1 to < 10 tonnes	CCOC(=O)[C@H](O)[C@@H](O)C(=O)OCC	InChI=1S/C8H14O6/c1-3-13-7(11)5(9)6(10)8(12)14-4-2/h5-6,9-10H,3-4H2,1-2H3/t5-,6-/m1/s1	CCOC(=O)C(O)C(O)C(=O)OCC	CCOC(=O)C(O)C(O)C(=O)OCC	TRUE	DTXCID6031170	CCOC(=O)[C@H](O)[C@@H](O)C(=O)OCC	FALSE	CCOC(=O)[C@@H]([C@H](C(=O)OCC)O)O	FALSE	missing stereochemistry	InChI=1S/C8H14O6/c1-3-13-7(11)5(9)6(10)8(12)14-4-2/h5-6,9-10H,3-4H2,1-2H3	InChI=1S/C8H14O6/c1-3-13-7(11)5(9)6(10)8(12)14-4-2/h5-6,9-10H,3-4H2,1-2H3/t5-,6-/m1/s1	InChI=1S/C8H14O6/c1-3-13-7(11)5(9)6(10)8(12)14-4-2/h5-6,9-10H,3-4H2,1-2H3/t5-,6-/m1/s1	FALSE	FALSE
9343	100.101.435	5-(2,4-dioxo-1,2,3,4-tetrahydropyrimidine)-3- fluoro-2-hydroxymethyltetrahydrofuran	OCC1OC(CC1F)N1C=CC(=O)NC1=O	InChI=1S/C9H11FN2O4/c10-5-3-8(16-6(5)4-13)12-2-1-7(14)11-9(12)15/h1-2,5-6,8,13H,3-4H2,(H,11,14,15)	FALSE	TRUE		415-360-8	41107-56-6	no	organic	mono-constituent substance	NONS	Tonnage data confidential	[H][C@@]1(C[C@H](F)[C@@H](CO)O1)N1C=CC(=O)NC1=O	InChI=1S/C9H11FN2O4/c10-5-3-8(16-6(5)4-13)12-2-1-7(14)11-9(12)15/h1-2,5-6,8,13H,3-4H2,(H,11,14,15)/t5-,6+,8+/m0/s1	OCC1OC(CC1F)N1C=CC(=O)NC1=O	OCC1OC(CC1F)N1C=CC(=O)NC1=O	TRUE	DTXCID201371305	[H][C@@]1(C[C@H](F)[C@@H](CO)O1)N1C=CC(=O)NC1=O	FALSE	C1[C@@H]([C@H](O[C@H]1N2C=CC(=O)NC2=O)CO)F	OK	missing stereochemistry	InChI=1S/C9H11FN2O4/c10-5-3-8(16-6(5)4-13)12-2-1-7(14)11-9(12)15/h1-2,5-6,8,13H,3-4H2,(H,11,14,15)	InChI=1S/C9H11FN2O4/c10-5-3-8(16-6(5)4-13)12-2-1-7(14)11-9(12)15/h1-2,5-6,8,13H,3-4H2,(H,11,14,15)/t5-,6+,8+/m0/s1	InChI=1S/C9H11FN2O4/c10-5-3-8(16-6(5)4-13)12-2-1-7(14)11-9(12)15/h1-2,5-6,8,13H,3-4H2,(H,11,14,15)/t5-,6+,8+/m0/s1	FALSE	FALSE
26702	100.260.747	trans-1,4-bis(isocyanatomethyl)cyclohexane	-	InChI=1S/C10H14N2O2/c13-7-11-5-9-1-2-10(4-3-9)6-12-8-14/h9-10H,1-6H2/t9-,10-	TRUE			825-609-6	98458-83-4	no	organic	mono-constituent substance	FULL	≥ 1 to < 10 tonnes	O=C=NC[C@H]1CC[C@H](CN=C=O)CC1	InChI=1S/C10H14N2O2/c13-7-11-5-9-1-2-10(4-3-9)6-12-8-14/h9-10H,1-6H2/t9-,10-	O=C=NCC1CC[C@H](CN=C=O)CC1	O=C=NCC1CC[C@H](CN=C=O)CC1	TRUE		O=C=NC[C@H]1CC[C@H](CN=C=O)CC1	FALSE			missing stereochemistry	InChI=1S/C10H14N2O2/c13-7-11-5-9-1-2-10(4-3-9)6-12-8-14/h9-10H,1-6H2/t9-,10?	InChI=1S/C10H14N2O2/c13-7-11-5-9-1-2-10(4-3-9)6-12-8-14/h9-10H,1-6H2/t9-,10-		FALSE
12105	100.001.738	Menthyl acetate	CC(C)[C@@H]1CC[C@@H](C)C[C@H]1OC(C)=O	InChI=1S/C12H22O2/c1-8(2)11-6-5-9(3)7-12(11)14-10(4)13/h8-9,11-12H,5-7H2,1-4H3/t9-,11+,12-/m1/s1	TRUE			201-911-8	89-48-5	no	organic	mono-constituent substance	FULL	≥ 100 to < 1000 tonnes	CC(C)[C@@H]1CC[C@@H](C)C[C@H]1OC(C)=O	InChI=1S/C12H22O2/c1-8(2)11-6-5-9(3)7-12(11)14-10(4)13/h8-9,11-12H,5-7H2,1-4H3/t9-,11+,12-/m1/s1	CC(C)C1CCC(C)CC1OC(C)=O	CC(C)C1CCC(C)CC1OC(C)=O	TRUE	DTXCID701510704	CC(C)[C@@H]1CC[C@@H](C)C[C@H]1OC(C)=O	FALSE	CC1CCC(C(C1)OC(=O)C)C(C)C	FALSE	missing stereochemistry	InChI=1S/C12H22O2/c1-8(2)11-6-5-9(3)7-12(11)14-10(4)13/h8-9,11-12H,5-7H2,1-4H3	InChI=1S/C12H22O2/c1-8(2)11-6-5-9(3)7-12(11)14-10(4)13/h8-9,11-12H,5-7H2,1-4H3/t9-,11+,12-/m1/s1	InChI=1S/C12H22O2/c1-8(2)11-6-5-9(3)7-12(11)14-10(4)13/h8-9,11-12H,5-7H2,1-4H3	FALSE	TRUE
9281	100.100.798	Cyclohexanecarboxylic acid, 4-(4-chlorophenyl)-, trans-	-	InChI=1S/C13H15ClO2/c14-12-7-5-10(6-8-12)9-1-3-11(4-2-9)13(15)16/h5-9,11H,1-4H2,(H,15,16)/t9-,11-	TRUE			406-380-8	49708-81-8	no	organic	mono-constituent substance	NONS	Tonnage data confidential	C(O)(=O)[C@H]1CC[C@@H](CC1)C2=CC=C(Cl)C=C2	InChI=1S/C13H15ClO2/c14-12-7-5-10(6-8-12)9-1-3-11(4-2-9)13(15)16/h5-9,11H,1-4H2,(H,15,16)/t9-,11-	OC(=O)C1CCC(CC1)C1=CC=C(Cl)C=C1	OC(=O)C1CCC(CC1)C1=CC=C(Cl)C=C1	TRUE	DTXCID501392059	OC(=O)C1CCC(CC1)C1=CC=C(Cl)C=C1	TRUE	C1CC(CCC1C2=CC=C(C=C2)Cl)C(=O)O	FALSE	missing stereochemistry	InChI=1S/C13H15ClO2/c14-12-7-5-10(6-8-12)9-1-3-11(4-2-9)13(15)16/h5-9,11H,1-4H2,(H,15,16)	InChI=1S/C13H15ClO2/c14-12-7-5-10(6-8-12)9-1-3-11(4-2-9)13(15)16/h5-9,11H,1-4H2,(H,15,16)	InChI=1S/C13H15ClO2/c14-12-7-5-10(6-8-12)9-1-3-11(4-2-9)13(15)16/h5-9,11H,1-4H2,(H,15,16)	TRUE	TRUE	C(O)(=O)[C@H]1CC[C@@H](CC1)C2=CC=C(Cl)C=C2	InChI=1S/C13H15ClO2/c14-12-7-5-10(6-8-12)9-1-3-11(4-2-9)13(15)16/h5-9,11H,1-4H2,(H,15,16)/t9-,11-	FALSE
13063	100.101.054	L-Proline, 1-benzoyl-4-hydroxy-, methyl ester, (4R)-	COC(=O)[C@@H]1C[C@@H](O)CN1C(=O)C1=CC=CC=C1	InChI=1S/C13H15NO4/c1-18-13(17)11-7-10(15)8-14(11)12(16)9-5-3-2-4-6-9/h2-6,10-11,15H,7-8H2,1H3/t10-,11+/m1/s1	TRUE			411-020-8	31560-20-0	no	organic	mono-constituent substance	INTERMEDIATE	Intermediate use only	C(=O)(N1[C@H](C(OC)=O)C[C@@H](O)C1)C2=CC=CC=C2	InChI=1S/C13H15NO4/c1-18-13(17)11-7-10(15)8-14(11)12(16)9-5-3-2-4-6-9/h2-6,10-11,15H,7-8H2,1H3/t10-,11+/m1/s1	COC(=O)C1CC(O)CN1C(=O)C1=CC=CC=C1	COC(=O)C1CC(O)CN1C(=O)C1=CC=CC=C1	TRUE	DTXCID301381585	[H][C@]1(O)CN(C(=O)C2=CC=CC=C2)[C@@]([H])(C1)C(=O)OC	FALSE	COC(=O)[C@@H]1C[C@H](CN1C(=O)C2=CC=CC=C2)O	FALSE	missing stereochemistry	InChI=1S/C13H15NO4/c1-18-13(17)11-7-10(15)8-14(11)12(16)9-5-3-2-4-6-9/h2-6,10-11,15H,7-8H2,1H3	InChI=1S/C13H15NO4/c1-18-13(17)11-7-10(15)8-14(11)12(16)9-5-3-2-4-6-9/h2-6,10-11,15H,7-8H2,1H3/t10-,11+/m1/s1	InChI=1S/C13H15NO4/c1-18-13(17)11-7-10(15)8-14(11)12(16)9-5-3-2-4-6-9/h2-6,10-11,15H,7-8H2,1H3/t10-,11+/m1/s1	FALSE	FALSE	C(=O)(N1[C@H](C(OC)=O)C[C@@H](O)C1)C2=CC=CC=C2
12857	100.101.360	Methyl N-(phenoxycarbonyl)-L-valinate	COC(=O)[C@@H](NC(=O)OC1=CC=CC=C1)C(C)C	InChI=1S/C13H17NO4/c1-9(2)11(12(15)17-3)14-13(16)18-10-7-5-4-6-8-10/h4-9,11H,1-3H3,(H,14,16)/t11-/m0/s1	TRUE			414-500-5	153441-77-1	no	organic	mono-constituent substance	NONS	Tonnage data confidential	CC(C)[C@@H](C(=O)OC)NC(=O)OC1=CC=CC=C1	InChI=1S/C13H17NO4/c1-9(2)11(12(15)17-3)14-13(16)18-10-7-5-4-6-8-10/h4-9,11H,1-3H3,(H,14,16)/t11-/m0/s1	COC(=O)C(NC(=O)OC1=CC=CC=C1)C(C)C	COC(=O)C(NC(=O)OC1=CC=CC=C1)C(C)C	TRUE	DTXCID701363393	[H][C@](N=C(O)OC1=CC=CC=C1)(C(C)C)C(=O)OC	Tautomer	CC(C)[C@@H](C(=O)OC)NC(=O)OC1=CC=CC=C1	OK	missing stereochemistry	InChI=1S/C13H17NO4/c1-9(2)11(12(15)17-3)14-13(16)18-10-7-5-4-6-8-10/h4-9,11H,1-3H3,(H,14,16)	InChI=1S/C13H17NO4/c1-9(2)11(12(15)17-3)14-13(16)18-10-7-5-4-6-8-10/h4-9,11H,1-3H3,(H,14,16)/t11-/m0/s1	InChI=1S/C13H17NO4/c1-9(2)11(12(15)17-3)14-13(16)18-10-7-5-4-6-8-10/h4-9,11H,1-3H3,(H,14,16)/t11-/m0/s1	FALSE	FALSE
9043	100.103.401	1H-Indene-4-propanoic acid, octahydro-7a-methyl-1,5-dioxo-, (3aS,4S,7aS)-	C[C@]12CCC(=O)[C@@H](CCC(O)=O)[C@@H]1CCC2=O	InChI=1S/C13H18O4/c1-13-7-6-10(14)8(2-5-12(16)17)9(13)3-4-11(13)15/h8-9H,2-7H2,1H3,(H,16,17)/t8-,9-,13-/m0/s1	TRUE			435-830-6	1944-63-4	no	organic	mono-constituent substance	NONS	Tonnage data confidential	C[C@]12CCC(=O)[C@@H](CCC(O)=O)[C@@H]1CCC2=O	InChI=1S/C13H18O4/c1-13-7-6-10(14)8(2-5-12(16)17)9(13)3-4-11(13)15/h8-9H,2-7H2,1H3,(H,16,17)/t8-,9-,13-/m0/s1	CC12CCC(=O)C(CCC(O)=O)C1CCC2=O	CC12CCC(=O)C(CCC(O)=O)C1CCC2=O	TRUE	DTXCID60423039	C[C@]12CCC(=O)[C@@H](CCC(O)=O)[C@@H]1CCC2=O	FALSE	C[C@]12CCC(=O)[C@H]([C@@H]1CCC2=O)CCC(=O)O	FALSE	missing stereochemistry	InChI=1S/C13H18O4/c1-13-7-6-10(14)8(2-5-12(16)17)9(13)3-4-11(13)15/h8-9H,2-7H2,1H3,(H,16,17)	InChI=1S/C13H18O4/c1-13-7-6-10(14)8(2-5-12(16)17)9(13)3-4-11(13)15/h8-9H,2-7H2,1H3,(H,16,17)/t8-,9-,13-/m0/s1	InChI=1S/C13H18O4/c1-13-7-6-10(14)8(2-5-12(16)17)9(13)3-4-11(13)15/h8-9H,2-7H2,1H3,(H,16,17)/t8-,9-,13-/m0/s1	FALSE	FALSE
3298	100.101.047	(S)-5-[2-(acetyloxy)propanamido]-2,4,6-triiodo-1,3-di(chloroformyl)benzene	C[C@H](OC(C)=O)C(=O)NC1=C(I)C(C(Cl)=O)=C(I)C(C(Cl)=O)=C1I	InChI=1S/C13H8Cl2I3NO5/c1-3(24-4(2)20)13(23)19-10-8(17)5(11(14)21)7(16)6(9(10)18)12(15)22/h3H,1-2H3,(H,19,23)/t3-/m0/s1	TRUE			410-940-7	60166-91-8	no	organic	mono-constituent substance	INTERMEDIATE	Intermediate use only	N(C([C@@H](OC(C)=O)C)=O)C1=C(I)C(C(Cl)=O)=C(I)C(C(Cl)=O)=C1I	InChI=1S/C13H8Cl2I3NO5/c1-3(24-4(2)20)13(23)19-10-8(17)5(11(14)21)7(16)6(9(10)18)12(15)22/h3H,1-2H3,(H,19,23)/t3-/m0/s1	CC(OC(C)=O)C(=O)NC1=C(I)C(C(Cl)=O)=C(I)C(C(Cl)=O)=C1I	CC(OC(C)=O)C(=O)NC1=C(I)C(C(Cl)=O)=C(I)C(C(Cl)=O)=C1I	TRUE						missing stereochemistry	InChI=1S/C13H8Cl2I3NO5/c1-3(24-4(2)20)13(23)19-10-8(17)5(11(14)21)7(16)6(9(10)18)12(15)22/h3H,1-2H3,(H,19,23)					N(C([C@@H](OC(C)=O)C)=O)C1=C(I)C(C(Cl)=O)=C(I)C(C(Cl)=O)=C1I	InChI=1S/C13H8Cl2I3NO5/c1-3(24-4(2)20)13(23)19-10-8(17)5(11(14)21)7(16)6(9(10)18)12(15)22/h3H,1-2H3,(H,19,23)/t3-/m0/s1	FALSE
2918	100.101.670	Methyl 2-benzoylamino-2-deoxy-α-D-glucopyranoside	CO[C@H]1O[C@H](CO)[C@@H](O)[C@H](O)[C@H]1NC(=O)C1=CC=CC=C1	InChI=1S/C14H19NO6/c1-20-14-10(12(18)11(17)9(7-16)21-14)15-13(19)8-5-3-2-4-6-8/h2-6,9-12,14,16-18H,7H2,1H3,(H,15,19)/t9-,10-,11-,12-,14+/m1/s1	TRUE			417-860-1	6863-90-7	no	organic	mono-constituent substance	NONS	Tonnage data confidential	N(C(=O)C1=CC=CC=C1)[C@H]2[C@@H](OC)O[C@H](CO)[C@@H](O)[C@@H]2O	InChI=1S/C14H19NO6/c1-20-14-10(12(18)11(17)9(7-16)21-14)15-13(19)8-5-3-2-4-6-8/h2-6,9-12,14,16-18H,7H2,1H3,(H,15,19)/t9-,10-,11-,12-,14+/m1/s1	COC1OC(CO)C(O)C(O)C1NC(=O)C1=CC=CC=C1	COC1OC(CO)C(O)C(O)C1NC(=O)C1=CC=CC=C1	TRUE	DTXCID80260625	COC1OC(CO)C(O)C(O)C1NC(=O)C1=CC=CC=C1	TRUE	COC1C(C(C(C(O1)CO)O)O)NC(=O)C2=CC=CC=C2	FALSE	missing stereochemistry	InChI=1S/C14H19NO6/c1-20-14-10(12(18)11(17)9(7-16)21-14)15-13(19)8-5-3-2-4-6-8/h2-6,9-12,14,16-18H,7H2,1H3,(H,15,19)	InChI=1S/C14H19NO6/c1-20-14-10(12(18)11(17)9(7-16)21-14)15-13(19)8-5-3-2-4-6-8/h2-6,9-12,14,16-18H,7H2,1H3,(H,15,19)	InChI=1S/C14H19NO6/c1-20-14-10(12(18)11(17)9(7-16)21-14)15-13(19)8-5-3-2-4-6-8/h2-6,9-12,14,16-18H,7H2,1H3,(H,15,19)		TRUE	N(C(=O)C1=CC=CC=C1)[C@H]2[C@@H](OC)O[C@H](CO)[C@@H](O)[C@@H]2O	InChI=1S/C14H19NO6/c1-20-14-10(12(18)11(17)9(7-16)21-14)15-13(19)8-5-3-2-4-6-8/h2-6,9-12,14,16-18H,7H2,1H3,(H,15,19)/t9-,10-,11-,12-,14+/m1/s1	FALSE
27974	100.255.713	ethyl (2S,3S)-3-[(2-chloro-5-fluoro-4-pyrimidinyl)amino]bicyclo[2.2.2]octane-2-carboxylate	CCOC(=O)[C@H]1C2CCC(CC2)[C@@H]1NC1=C(F)C=NC(Cl)=N1	InChI=1S/C15H19ClFN3O2/c1-2-22-14(21)11-8-3-5-9(6-4-8)12(11)19-13-10(17)7-18-15(16)20-13/h7-9,11-12H,2-6H2,1H3,(H,18,19,20)/t8?,9?,11-,12-/m0/s1	TRUE			821-183-0	1777721-57-9	no	organic	mono-constituent substance	FULL	Cease manufacture	CCOC(=O)[C@H]1C2CCC(CC2)[C@@H]1NC1=NC(Cl)=NC=C1F	InChI=1S/C15H19ClFN3O2/c1-2-22-14(21)11-8-3-5-9(6-4-8)12(11)19-13-10(17)7-18-15(16)20-13/h7-9,11-12H,2-6H2,1H3,(H,18,19,20)/t8?,9?,11-,12-/m0/s1	CCOC(=O)[C@H]1C2CCC(CC2)C1NC1=NC(Cl)=NC=C1F	CCOC(=O)[C@H]1C2CCC(CC2)C1NC1=NC(Cl)=NC=C1F	TRUE		CCOC(=O)[C@H]1C2CCC(CC2)[C@@H]1NC1=NC(Cl)=NC=C1F	FALSE			missing stereochemistry	InChI=1S/C15H19ClFN3O2/c1-2-22-14(21)11-8-3-5-9(6-4-8)12(11)19-13-10(17)7-18-15(16)20-13/h7-9,11-12H,2-6H2,1H3,(H,18,19,20)/t8?,9?,11-,12?/m0/s1	InChI=1S/C15H19ClFN3O2/c1-2-22-14(21)11-8-3-5-9(6-4-8)12(11)19-13-10(17)7-18-15(16)20-13/h7-9,11-12H,2-6H2,1H3,(H,18,19,20)/t8?,9?,11-,12-/m0/s1		FALSE
3612	100.103.740	L-alpha-glutamyltryptamine	N[C@@H](CCC(O)=O)C(=O)NCCC1=CNC2=CC=CC=C12	InChI=1S/C15H19N3O3/c16-12(5-6-14(19)20)15(21)17-8-7-10-9-18-13-4-2-1-3-11(10)13/h1-4,9,12,18H,5-8,16H2,(H,17,21)(H,19,20)/t12-/m0/s1	TRUE			441-180-4	478273-36-8	no	organic	mono-constituent substance	NONS	Tonnage data confidential	C(CNC([C@H](CCC(O)=O)N)=O)C=1C=2C(NC1)=CC=CC2	InChI=1S/C15H19N3O3/c16-12(5-6-14(19)20)15(21)17-8-7-10-9-18-13-4-2-1-3-11(10)13/h1-4,9,12,18H,5-8,16H2,(H,17,21)(H,19,20)/t12-/m0/s1	NC(CCC(O)=O)C(=O)NCCC1=CNC2=CC=CC=C12	NC(CCC(O)=O)C(=O)NCCC1=CNC2=CC=CC=C12	TRUE	DTXCID30390183	N[C@@H](CCC(O)=O)C(=O)NCCC1=CNC2=CC=CC=C12	FALSE	C1=CC=C2C(=C1)C(=CN2)CCNC(=O)[C@H](CCC(=O)O)N	FALSE	missing stereochemistry	InChI=1S/C15H19N3O3/c16-12(5-6-14(19)20)15(21)17-8-7-10-9-18-13-4-2-1-3-11(10)13/h1-4,9,12,18H,5-8,16H2,(H,17,21)(H,19,20)	InChI=1S/C15H19N3O3/c16-12(5-6-14(19)20)15(21)17-8-7-10-9-18-13-4-2-1-3-11(10)13/h1-4,9,12,18H,5-8,16H2,(H,17,21)(H,19,20)/t12-/m0/s1	InChI=1S/C15H19N3O3/c16-12(5-6-14(19)20)15(21)17-8-7-10-9-18-13-4-2-1-3-11(10)13/h1-4,9,12,18H,5-8,16H2,(H,17,21)(H,19,20)/t12-/m0/s1	FALSE	FALSE	C(CNC([C@H](CCC(O)=O)N)=O)C=1C=2C(NC1)=CC=CC2
32087	100.100.784	Methyl (R)-2-(4-(3-chloro-5-trifluoromethyl-2-pyridyloxy)phenoxy)propionate	COC(=O)[C@@H](C)OC1=CC=C(OC2=NC=C(C=C2Cl)C(F)(F)F)C=C1	InChI=1S/C16H13ClF3NO4/c1-9(15(22)23-2)24-11-3-5-12(6-4-11)25-14-13(17)7-10(8-21-14)16(18,19)20/h3-9H,1-2H3/t9-/m1/s1	TRUE			406-250-0	72619-32-0	no	organic	mono-constituent substance	FULL	≥ 1000 to < 10000 tonnes	COC(=O)[C@@H](C)OC1=CC=C(OC2=C(Cl)C=C(C=N2)C(F)(F)F)C=C1	InChI=1S/C16H13ClF3NO4/c1-9(15(22)23-2)24-11-3-5-12(6-4-11)25-14-13(17)7-10(8-21-14)16(18,19)20/h3-9H,1-2H3/t9-/m1/s1	COC(=O)C(C)OC1=CC=C(OC2=C(Cl)C=C(C=N2)C(F)(F)F)C=C1	COC(=O)C(C)OC1=CC=C(OC2=C(Cl)C=C(C=N2)C(F)(F)F)C=C1	TRUE	DTXCID0032233	COC(=O)[C@@H](C)OC1=CC=C(OC2=C(Cl)C=C(C=N2)C(F)(F)F)C=C1	FALSE	C[C@H](C(=O)OC)OC1=CC=C(C=C1)OC2=C(C=C(C=N2)C(F)(F)F)Cl	FALSE	missing stereochemistry	InChI=1S/C16H13ClF3NO4/c1-9(15(22)23-2)24-11-3-5-12(6-4-11)25-14-13(17)7-10(8-21-14)16(18,19)20/h3-9H,1-2H3	InChI=1S/C16H13ClF3NO4/c1-9(15(22)23-2)24-11-3-5-12(6-4-11)25-14-13(17)7-10(8-21-14)16(18,19)20/h3-9H,1-2H3/t9-/m1/s1	InChI=1S/C16H13ClF3NO4/c1-9(15(22)23-2)24-11-3-5-12(6-4-11)25-14-13(17)7-10(8-21-14)16(18,19)20/h3-9H,1-2H3/t9-/m1/s1	FALSE	FALSE
4459	100.102.576	1-(4-(trans-4-butylcyclohexyl)phenyl)ethanone	-	InChI=1S/C18H26O/c1-3-4-5-15-6-8-17(9-7-15)18-12-10-16(11-13-18)14(2)19/h10-13,15,17H,3-9H2,1-2H3/t15-,17-	TRUE			427-320-7	83626-30-6	no	organic	mono-constituent substance	NONS	Cease manufacture	C(CCC)[C@H]1CC[C@@H](CC1)C2=CC=C(C(C)=O)C=C2	InChI=1S/C18H26O/c1-3-4-5-15-6-8-17(9-7-15)18-12-10-16(11-13-18)14(2)19/h10-13,15,17H,3-9H2,1-2H3/t15-,17-	CCCCC1CC[C@@H](CC1)C1=CC=C(C=C1)C(C)=O	CCCCC1CC[C@@H](CC1)C1=CC=C(C=C1)C(C)=O	TRUE				CCCCC1CCC(CC1)C2=CC=C(C=C2)C(=O)C	FALSE	missing stereochemistry	InChI=1S/C18H26O/c1-3-4-5-15-6-8-17(9-7-15)18-12-10-16(11-13-18)14(2)19/h10-13,15,17H,3-9H2,1-2H3/t15?,17-		InChI=1S/C18H26O/c1-3-4-5-15-6-8-17(9-7-15)18-12-10-16(11-13-18)14(2)19/h10-13,15,17H,3-9H2,1-2H3		FALSE
4918	100.101.740	Ethyl 6-O-decanoyl-D-glucopyranoside	CCCCCCCCCC(=O)OC[C@H]1OC(OCC)[C@H](O)[C@@H](O)[C@@H]1O	InChI=1S/C18H34O7/c1-3-5-6-7-8-9-10-11-14(19)24-12-13-15(20)16(21)17(22)18(25-13)23-4-2/h13,15-18,20-22H,3-12H2,1-2H3/t13-,15-,16+,17-,18?/m1/s1	TRUE			418-590-7	124285-42-3	no	organic	mono-constituent substance	NONS	Tonnage data confidential	C(OC(CCCCCCCCC)=O)[C@H]1OC(OCC)[C@H](O)[C@@H](O)[C@@H]1O	InChI=1S/C18H34O7/c1-3-5-6-7-8-9-10-11-14(19)24-12-13-15(20)16(21)17(22)18(25-13)23-4-2/h13,15-18,20-22H,3-12H2,1-2H3/t13-,15-,16+,17-,18?/m1/s1	CCCCCCCCCC(=O)OCC1OC(CCO)C(O)C(O)C1O	CCCCCCCCCC(=O)OCC1OC(CCO)C(O)C(O)C1O	TRUE						missing stereochemistry	InChI=1S/C18H34O7/c1-2-3-4-5-6-7-8-9-15(20)24-12-14-17(22)18(23)16(21)13(25-14)10-11-19/h13-14,16-19,21-23H,2-12H2,1H3					C(OC(CCCCCCCCC)=O)[C@H]1OC(OCC)[C@H](O)[C@@H](O)[C@@H]1O	InChI=1S/C18H34O7/c1-3-5-6-7-8-9-10-11-14(19)24-12-13-15(20)16(21)17(22)18(25-13)23-4-2/h13,15-18,20-22H,3-12H2,1-2H3/t13-,15-,16+,17-,18?/m1/s1	FALSE
8999	100.103.602	9H-Fluoren-9-ylmethyl [(1R,2R)-(2-hydroxy-1-hydroxymethylpropyl)]carbamate	C[C@@H](O)[C@@H](CO)NC(=O)OCC1C2=CC=CC=C2C2=C1C=CC=C2	InChI=1S/C19H21NO4/c1-12(22)18(10-21)20-19(23)24-11-17-15-8-4-2-6-13(15)14-7-3-5-9-16(14)17/h2-9,12,17-18,21-22H,10-11H2,1H3,(H,20,23)/t12-,18-/m1/s1	TRUE			439-410-3	176380-53-3	no	organic	mono-constituent substance	NONS	Tonnage data confidential	C[C@@H](O)[C@@H](CO)NC(=O)OCC1C2=CC=CC=C2C2=CC=CC=C12	InChI=1S/C19H21NO4/c1-12(22)18(10-21)20-19(23)24-11-17-15-8-4-2-6-13(15)14-7-3-5-9-16(14)17/h2-9,12,17-18,21-22H,10-11H2,1H3,(H,20,23)/t12-,18-/m1/s1	CC(O)C(CO)NC(=O)OCC1C2=C(C=CC=C2)C2=C1C=CC=C2	CC(O)C(CO)NC(=O)OCC1C2=C(C=CC=C2)C2=C1C=CC=C2	TRUE		C[C@@H](O)[C@@H](CO)NC(=O)OCC1C2=CC=CC=C2C2=CC=CC=C12	FALSE	C[C@H]([C@@H](CO)NC(=O)OCC1C2=CC=CC=C2C3=CC=CC=C13)O	FALSE	missing stereochemistry	InChI=1S/C19H21NO4/c1-12(22)18(10-21)20-19(23)24-11-17-15-8-4-2-6-13(15)14-7-3-5-9-16(14)17/h2-9,12,17-18,21-22H,10-11H2,1H3,(H,20,23)	InChI=1S/C19H21NO4/c1-12(22)18(10-21)20-19(23)24-11-17-15-8-4-2-6-13(15)14-7-3-5-9-16(14)17/h2-9,12,17-18,21-22H,10-11H2,1H3,(H,20,23)/t12-,18-/m1/s1	InChI=1S/C19H21NO4/c1-12(22)18(10-21)20-19(23)24-11-17-15-8-4-2-6-13(15)14-7-3-5-9-16(14)17/h2-9,12,17-18,21-22H,10-11H2,1H3,(H,20,23)/t12-,18-/m1/s1	FALSE	FALSE
6555	100.100.929	3-oxo-4-azaandrost-5-ene-17β-carboxylic acid	C[C@]12CC[C@H]3[C@@H](CC=C4NC(=O)CC[C@]34C)[C@@H]1CC[C@@H]2C(O)=O	InChI=1S/C19H27NO3/c1-18-9-7-13-11(12(18)4-5-14(18)17(22)23)3-6-15-19(13,2)10-8-16(21)20-15/h6,11-14H,3-5,7-10H2,1-2H3,(H,20,21)(H,22,23)/t11-,12-,13-,14+,18-,19+/m0/s1	TRUE			407-830-6	103335-54-2	no	organic	mono-constituent substance	NONS	Tonnage data confidential	[H][C@@]12CC[C@H](C(O)=O)[C@@]1(C)CC[C@@]1([H])[C@@]2([H])CC=C2NC(=O)CC[C@]12C	InChI=1S/C19H27NO3/c1-18-9-7-13-11(12(18)4-5-14(18)17(22)23)3-6-15-19(13,2)10-8-16(21)20-15/h6,11-14H,3-5,7-10H2,1-2H3,(H,20,21)(H,22,23)/t11-,12-,13-,14+,18-,19+/m0/s1	CC12CCC3C(CC=C4NC(=O)CCC34C)C1CCC2C(O)=O	CC12CCC3C(CC=C4NC(=O)CCC34C)C1CCC2C(O)=O	TRUE	DTXCID401323657	[H][C@@]12CC[C@H](C(O)=O)[C@@]1(C)CC[C@@]1([H])[C@@]2([H])CC=C2NC(=O)CC[C@]12C	FALSE	C[C@]12CC[C@H]3[C@H]([C@@H]1CC[C@@H]2C(=O)O)CC=C4[C@@]3(CCC(=O)N4)C	OK	missing stereochemistry	InChI=1S/C19H27NO3/c1-18-9-7-13-11(12(18)4-5-14(18)17(22)23)3-6-15-19(13,2)10-8-16(21)20-15/h6,11-14H,3-5,7-10H2,1-2H3,(H,20,21)(H,22,23)	InChI=1S/C19H27NO3/c1-18-9-7-13-11(12(18)4-5-14(18)17(22)23)3-6-15-19(13,2)10-8-16(21)20-15/h6,11-14H,3-5,7-10H2,1-2H3,(H,20,21)(H,22,23)/t11-,12-,13-,14+,18-,19+/m0/s1	InChI=1S/C19H27NO3/c1-18-9-7-13-11(12(18)4-5-14(18)17(22)23)3-6-15-19(13,2)10-8-16(21)20-15/h6,11-14H,3-5,7-10H2,1-2H3,(H,20,21)(H,22,23)/t11-,12-,13-,14+,18-,19+/m0/s1	FALSE	FALSE
2956	100.102.528	1-(4-(trans-4-pentylcyclohexyl)phenyl)ethanone	-	InChI=1S/C19H28O/c1-3-4-5-6-16-7-9-18(10-8-16)19-13-11-17(12-14-19)15(2)20/h11-14,16,18H,3-10H2,1-2H3/t16-,18-	TRUE			426-830-7	78531-59-6	no	organic	mono-constituent substance	NONS	Cease manufacture	C(CCCC)[C@H]1CC[C@@H](CC1)C2=CC=C(C(C)=O)C=C2	InChI=1S/C19H28O/c1-3-4-5-6-16-7-9-18(10-8-16)19-13-11-17(12-14-19)15(2)20/h11-14,16,18H,3-10H2,1-2H3/t16-,18-	CCCCCC1CC[C@@H](CC1)C1=CC=C(C=C1)C(C)=O	CCCCCC1CC[C@@H](CC1)C1=CC=C(C=C1)C(C)=O	TRUE				CCCCCC1CCC(CC1)C2=CC=C(C=C2)C(=O)C	FALSE	missing stereochemistry	InChI=1S/C19H28O/c1-3-4-5-6-16-7-9-18(10-8-16)19-13-11-17(12-14-19)15(2)20/h11-14,16,18H,3-10H2,1-2H3/t16?,18-		InChI=1S/C19H28O/c1-3-4-5-6-16-7-9-18(10-8-16)19-13-11-17(12-14-19)15(2)20/h11-14,16,18H,3-10H2,1-2H3		FALSE
4033	100.100.928	3-oxo-4-aza-5α-androstane-17β-carboxylic acid	C[C@]12CC[C@H]3[C@@H](CC[C@H]4NC(=O)CC[C@]34C)[C@@H]1CC[C@@H]2C(O)=O	InChI=1S/C19H29NO3/c1-18-9-7-13-11(12(18)4-5-14(18)17(22)23)3-6-15-19(13,2)10-8-16(21)20-15/h11-15H,3-10H2,1-2H3,(H,20,21)(H,22,23)/t11-,12-,13-,14+,15+,18-,19+/m0/s1	TRUE			407-820-1	103335-55-3	no	organic	mono-constituent substance	NONS	No longer valid	C[C@]12CC[C@H]3[C@@H](CC[C@H]4NC(=O)CC[C@]34C)[C@@H]1CC[C@@H]2C(O)=O	InChI=1S/C19H29NO3/c1-18-9-7-13-11(12(18)4-5-14(18)17(22)23)3-6-15-19(13,2)10-8-16(21)20-15/h11-15H,3-10H2,1-2H3,(H,20,21)(H,22,23)/t11-,12-,13-,14+,15+,18-,19+/m0/s1	[H]C12CCC(C(O)=O)C1(C)CCC1([H])C2CCC2([H])NC(=O)CCC12C	[H]C12CCC(C(O)=O)C1(C)CCC1([H])C2CCC2([H])NC(=O)CCC12C	TRUE	DTXCID00382131	C[C@]12CC[C@H]3[C@@H](CC[C@H]4NC(=O)CC[C@]34C)[C@@H]1CC[C@@H]2C(O)=O	FALSE	C[C@]12CC[C@H]3[C@H]([C@@H]1CC[C@@H]2C(=O)O)CC[C@@H]4[C@@]3(CCC(=O)N4)C	FALSE	missing stereochemistry	InChI=1S/C19H29NO3/c1-18-9-7-13-11(12(18)4-5-14(18)17(22)23)3-6-15-19(13,2)10-8-16(21)20-15/h11-15H,3-10H2,1-2H3,(H,20,21)(H,22,23)	InChI=1S/C19H29NO3/c1-18-9-7-13-11(12(18)4-5-14(18)17(22)23)3-6-15-19(13,2)10-8-16(21)20-15/h11-15H,3-10H2,1-2H3,(H,20,21)(H,22,23)/t11-,12-,13-,14+,15+,18-,19+/m0/s1	InChI=1S/C19H29NO3/c1-18-9-7-13-11(12(18)4-5-14(18)17(22)23)3-6-15-19(13,2)10-8-16(21)20-15/h11-15H,3-10H2,1-2H3,(H,20,21)(H,22,23)/t11-,12-,13-,14+,15+,18-,19+/m0/s1	FALSE	FALSE
4022	100.100.909	tert-butyl (5S,6R,7R)-3-bromomethyl-5,8-dioxo-7-(2-phenylacetamido)-5-thia-1-azabicyclo[4.2.0]oct-2-ene-2-carboxylate	CC(C)(C)OC(=O)C1=C(CBr)C[S@](=O)[C@@H]2[C@H](NC(=O)CC3=CC=CC=C3)C(=O)N12	InChI=1S/C20H23BrN2O5S/c1-20(2,3)28-19(26)16-13(10-21)11-29(27)18-15(17(25)23(16)18)22-14(24)9-12-7-5-4-6-8-12/h4-8,15,18H,9-11H2,1-3H3,(H,22,24)/t15-,18-,29+/m1/s1	TRUE			407-620-4	33610-13-8	no	organic	mono-constituent substance	NONS	Tonnage data confidential	N(C(CC1=CC=CC=C1)=O)[C@H]2[C@@]3(N(C(C(OC(C)(C)C)=O)=C(CBr)C[S@@]3=O)C2=O)[H]	InChI=1S/C20H23BrN2O5S/c1-20(2,3)28-19(26)16-13(10-21)11-29(27)18-15(17(25)23(16)18)22-14(24)9-12-7-5-4-6-8-12/h4-8,15,18H,9-11H2,1-3H3,(H,22,24)/t15-,18-,29+/m1/s1	[H][C@@]12C(NC(=O)CC3=CC=CC=C3)C(=O)N1C(C(=O)OC(C)(C)C)=C(CBr)CS2=O	[H][C@@]12C(NC(=O)CC3=CC=CC=C3)C(=O)N1C(C(=O)OC(C)(C)C)=C(CBr)CS2=O	TRUE						missing stereochemistry	InChI=1S/C20H23BrN2O5S/c1-20(2,3)28-19(26)16-13(10-21)11-29(27)18-15(17(25)23(16)18)22-14(24)9-12-7-5-4-6-8-12/h4-8,15,18H,9-11H2,1-3H3,(H,22,24)/t15?,18-,29?/m1/s1					N(C(CC1=CC=CC=C1)=O)[C@H]2[C@@]3(N(C(C(OC(C)(C)C)=O)=C(CBr)C[S@@]3=O)C2=O)[H]	InChI=1S/C20H23BrN2O5S/c1-20(2,3)28-19(26)16-13(10-21)11-29(27)18-15(17(25)23(16)18)22-14(24)9-12-7-5-4-6-8-12/h4-8,15,18H,9-11H2,1-3H3,(H,22,24)/t15-,18-,29+/m1/s1	FALSE
2683	100.102.908	(S)-4-(4-dimethylamino-1-(4-fluorophenyl)-1-hydroxybutyl)-3-(hydroxymethyl)benzonitrile	CN(C)CCC[C@](O)(C1=CC=C(F)C=C1)C1=C(CO)C=C(C=C1)C#N	InChI=1S/C20H23FN2O2/c1-23(2)11-3-10-20(25,17-5-7-18(21)8-6-17)19-9-4-15(13-22)12-16(19)14-24/h4-9,12,24-25H,3,10-11,14H2,1-2H3/t20-/m0/s1	TRUE			430-770-7	128173-52-4	no	organic	mono-constituent substance	NONS	Tonnage data confidential	[C@@](CCCN(C)C)(O)(C1=C(CO)C=C(C#N)C=C1)C2=CC=C(F)C=C2	InChI=1S/C20H23FN2O2/c1-23(2)11-3-10-20(25,17-5-7-18(21)8-6-17)19-9-4-15(13-22)12-16(19)14-24/h4-9,12,24-25H,3,10-11,14H2,1-2H3/t20-/m0/s1	CN(C)CCCC(O)(C1=CC=C(F)C=C1)C1=C(CO)C=C(C=C1)C#N	CN(C)CCCC(O)(C1=CC=C(F)C=C1)C1=C(CO)C=C(C=C1)C#N	TRUE						missing stereochemistry	InChI=1S/C20H23FN2O2/c1-23(2)11-3-10-20(25,17-5-7-18(21)8-6-17)19-9-4-15(13-22)12-16(19)14-24/h4-9,12,24-25H,3,10-11,14H2,1-2H3					[C@@](CCCN(C)C)(O)(C1=C(CO)C=C(C#N)C=C1)C2=CC=C(F)C=C2	InChI=1S/C20H23FN2O2/c1-23(2)11-3-10-20(25,17-5-7-18(21)8-6-17)19-9-4-15(13-22)12-16(19)14-24/h4-9,12,24-25H,3,10-11,14H2,1-2H3/t20-/m0/s1	FALSE
8423	100.102.907	(R)-4-(4-dimethylamino-1-(4-fluorophenyl)-1-hydroxybutyl)-3-(hydroxymethyl)benzonitrile	CN(C)CCC[C@@](O)(C1=CC=C(F)C=C1)C1=C(CO)C=C(C=C1)C#N	InChI=1S/C20H23FN2O2/c1-23(2)11-3-10-20(25,17-5-7-18(21)8-6-17)19-9-4-15(13-22)12-16(19)14-24/h4-9,12,24-25H,3,10-11,14H2,1-2H3/t20-/m1/s1	TRUE			430-760-2	219861-18-4	no	organic	mono-constituent substance	NONS	Tonnage data confidential	[C@](CCCN(C)C)(O)(C1=C(CO)C=C(C#N)C=C1)C2=CC=C(F)C=C2	InChI=1S/C20H23FN2O2/c1-23(2)11-3-10-20(25,17-5-7-18(21)8-6-17)19-9-4-15(13-22)12-16(19)14-24/h4-9,12,24-25H,3,10-11,14H2,1-2H3/t20-/m1/s1	CN(C)CCCC(O)(C1=CC=C(F)C=C1)C1=C(CO)C=C(C=C1)C#N	CN(C)CCCC(O)(C1=CC=C(F)C=C1)C1=C(CO)C=C(C=C1)C#N	TRUE						missing stereochemistry	InChI=1S/C20H23FN2O2/c1-23(2)11-3-10-20(25,17-5-7-18(21)8-6-17)19-9-4-15(13-22)12-16(19)14-24/h4-9,12,24-25H,3,10-11,14H2,1-2H3					[C@](CCCN(C)C)(O)(C1=C(CO)C=C(C#N)C=C1)C2=CC=C(F)C=C2	InChI=1S/C20H23FN2O2/c1-23(2)11-3-10-20(25,17-5-7-18(21)8-6-17)19-9-4-15(13-22)12-16(19)14-24/h4-9,12,24-25H,3,10-11,14H2,1-2H3/t20-/m1/s1	FALSE
4134	100.101.852	(3 β, 5 α, 6β)-3-(acetyloxy)-5-bromo-6-hydroxy-androstan-17-one	CC(=O)O[C@H]1CC[C@]2(C)[C@H]3CC[C@@]4(C)[C@@H](CCC4=O)[C@@H]3C[C@@H](O)[C@@]2(Br)C1	InChI=1S/C21H31BrO4/c1-12(23)26-13-6-9-20(3)16-7-8-19(2)15(4-5-17(19)24)14(16)10-18(25)21(20,22)11-13/h13-16,18,25H,4-11H2,1-3H3/t13-,14-,15-,16-,18+,19-,20+,21-/m0/s1	TRUE			419-790-7	4229-69-0	no	organic	mono-constituent substance	NONS	Cease manufacture	[H][C@@]12CCC(=O)[C@@]1(C)CC[C@@]1([H])[C@@]2([H])C[C@@]([H])(O)[C@@]2(Br)C[C@]([H])(CC[C@]12C)OC(C)=O	InChI=1S/C21H31BrO4/c1-12(23)26-13-6-9-20(3)16-7-8-19(2)15(4-5-17(19)24)14(16)10-18(25)21(20,22)11-13/h13-16,18,25H,4-11H2,1-3H3/t13-,14-,15-,16-,18+,19-,20+,21-/m0/s1	CC(=O)OC1CCC2(C)C3CCC4(C)CC(=O)CC4C3CC(O)[C@@]2(Br)C1	CC(=O)OC1CCC2(C)C3CCC4(C)CC(=O)CC4C3CC(O)[C@@]2(Br)C1	TRUE	DTXCID301390219	[H][C@@]12CCC(=O)[C@@]1(C)CC[C@@]1([H])[C@@]2([H])C[C@@]([H])(O)[C@@]2(Br)C[C@]([H])(CC[C@]12C)OC(C)=O	FALSE	CC(=O)O[C@H]1CC[C@@]2([C@H]3CC[C@]4([C@H]([C@@H]3C[C@H]([C@]2(C1)Br)O)CCC4=O)C)C	FALSE	missing stereochemistry	InChI=1S/C21H31BrO4/c1-12(23)26-14-4-7-20(3)16-5-6-19(2)10-13(24)8-17(19)15(16)9-18(25)21(20,22)11-14/h14-18,25H,4-11H2,1-3H3/t14?,15?,16?,17?,18?,19?,20?,21-/m0/s1	InChI=1S/C21H31BrO4/c1-12(23)26-13-6-9-20(3)16-7-8-19(2)15(4-5-17(19)24)14(16)10-18(25)21(20,22)11-13/h13-16,18,25H,4-11H2,1-3H3/t13-,14-,15-,16-,18+,19-,20+,21-/m0/s1	InChI=1S/C21H31BrO4/c1-12(23)26-13-6-9-20(3)16-7-8-19(2)15(4-5-17(19)24)14(16)10-18(25)21(20,22)11-13/h13-16,18,25H,4-11H2,1-3H3/t13-,14-,15-,16-,18+,19-,20+,21-/m0/s1	FALSE	FALSE
9943	100.101.332	(+/-) tetrahydrofurfuryl (R)-2-[4-(6-chloroquinoxalin-2-yloxy)phenyloxy]propionate	C[C@@H](OC1=CC=C(OC2=CN=C3C=C(Cl)C=CC3=N2)C=C1)C(=O)OCC1CCCO1	InChI=1S/C22H21ClN2O5/c1-14(22(26)28-13-18-3-2-10-27-18)29-16-5-7-17(8-6-16)30-21-12-24-20-11-15(23)4-9-19(20)25-21/h4-9,11-12,14,18H,2-3,10,13H2,1H3/t14-,18?/m1/s1	TRUE			414-200-4	200509-41-7	no	organic	mono-constituent substance	NONS	Cease manufacture	C[C@H](C(=O)OCC1CCCO1)OC2=CC=C(C=C2)OC3=CN=C4C=C(C=CC4=N3)Cl	InChI=1S/C22H21ClN2O5/c1-14(22(26)28-13-18-3-2-10-27-18)29-16-5-7-17(8-6-16)30-21-12-24-20-11-15(23)4-9-19(20)25-21/h4-9,11-12,14,18H,2-3,10,13H2,1H3/t14-,18?/m1/s1	CC(OC1=CC=C(OC2=CN=C3C=C(Cl)C=CC3=N2)C=C1)C(=O)OCC1CCCO1	CC(OC1=CC=C(OC2=CN=C3C=C(Cl)C=CC3=N2)C=C1)C(=O)OCC1CCCO1	TRUE	DTXCID2032009			C[C@H](C(=O)OCC1CCCO1)OC2=CC=C(C=C2)OC3=CN=C4C=C(C=CC4=N3)Cl	FALSE	missing stereochemistry	InChI=1S/C22H21ClN2O5/c1-14(22(26)28-13-18-3-2-10-27-18)29-16-5-7-17(8-6-16)30-21-12-24-20-11-15(23)4-9-19(20)25-21/h4-9,11-12,14,18H,2-3,10,13H2,1H3		InChI=1S/C22H21ClN2O5/c1-14(22(26)28-13-18-3-2-10-27-18)29-16-5-7-17(8-6-16)30-21-12-24-20-11-15(23)4-9-19(20)25-21/h4-9,11-12,14,18H,2-3,10,13H2,1H3/t14-,18?/m1/s1		FALSE
30955	100.277.989	(2R)-2-(2,4-difluorophenyl)-1,1-difluoro-1-{5-[4-(2,2,2-trifluoroethoxy)phenyl]pyridin-2-yl}-3-(1H-tetrazol-1-yl)propan-2-ol	O[C@@](CN1C=NN=N1)(C1=C(F)C=C(F)C=C1)C(F)(F)C1=NC=C(C=C1)C1=CC=C(OCC(F)(F)F)C=C1	InChI=1S/C23H16F7N5O2/c24-16-4-7-18(19(25)9-16)21(36,11-35-13-32-33-34-35)23(29,30)20-8-3-15(10-31-20)14-1-5-17(6-2-14)37-12-22(26,27)28/h1-10,13,36H,11-12H2/t21-/m0/s1	TRUE			841-499-2	1340593-59-0	no	organic	mono-constituent substance	FULL	Cease manufacture	C1=CC(=CC=C1C2=CN=C(C=C2)C([C@](CN3C=NN=N3)(C4=C(C=C(C=C4)F)F)O)(F)F)OCC(F)(F)F	InChI=1S/C23H16F7N5O2/c24-16-4-7-18(19(25)9-16)21(36,11-35-13-32-33-34-35)23(29,30)20-8-3-15(10-31-20)14-1-5-17(6-2-14)37-12-22(26,27)28/h1-10,13,36H,11-12H2/t21-/m0/s1	OC([CH2:3][N:1]1[CH:5]=[N:4][N:3]=[N:2]1)([C:1]1=[CH:6][CH:5]=[C:4](F)[CH:3]=[C:2]1F)[C:1](F)(F)[C:2]1=[CH:3][CH:4]=[C:5]([CH:6]=[N:1]1)[C:1]1=[CH:6][CH:5]=[C:4](O[CH2:1][C:2](F)(F)F)[CH:3]=[CH:2]1	OC([CH2:3][N:1]1[CH:5]=[N:4][N:3]=[N:2]1)([C:1]1=[CH:6][CH:5]=[C:4](F)[CH:3]=[C:2]1F)[C:1](F)(F)[C:2]1=[CH:3][CH:4]=[C:5]([CH:6]=[N:1]1)[C:1]1=[CH:6][CH:5]=[C:4](O[CH2:1][C:2](F)(F)F)[CH:3]=[CH:2]1	TRUE				C1=CC(=CC=C1C2=CN=C(C=C2)C([C@](CN3C=NN=N3)(C4=C(C=C(C=C4)F)F)O)(F)F)OCC(F)(F)F	FALSE	missing stereochemistry	InChI=1S/C23H16F7N5O2/c24-16-4-7-18(19(25)9-16)21(36,11-35-13-32-33-34-35)23(29,30)20-8-3-15(10-31-20)14-1-5-17(6-2-14)37-12-22(26,27)28/h1-10,13,36H,11-12H2		InChI=1S/C23H16F7N5O2/c24-16-4-7-18(19(25)9-16)21(36,11-35-13-32-33-34-35)23(29,30)20-8-3-15(10-31-20)14-1-5-17(6-2-14)37-12-22(26,27)28/h1-10,13,36H,11-12H2/t21-/m0/s1		FALSE
8800	100.105.377	Cyclopenta[c]pyrrole-1-carboxylic acid, 2-[(2S)-2-[[(2S)-2-amino-2-cyclohexylacetyl]amino]-3,3-dimethyl-1-oxobutyl]octahydro-, 1,1-dimethylethyl ester, (1S,3aR,6aS	CC(C)(C)OC(=O)[C@@H]1[C@H]2CCC[C@H]2CN1C(=O)[C@@H](NC(=O)[C@@H](N)C1CCCCC1)C(C)(C)C	InChI=1S/C26H45N3O4/c1-25(2,3)21(28-22(30)19(27)16-11-8-7-9-12-16)23(31)29-15-17-13-10-14-18(17)20(29)24(32)33-26(4,5)6/h16-21H,7-15,27H2,1-6H3,(H,28,30)/t17-,18-,19-,20-,21+/m0/s1	TRUE			482-250-4	926276-18-8	no	organic	mono-constituent substance	INTERMEDIATE	Intermediate use only	C(OC(C)(C)C)(=O)[C@H]1N(C([C@@H](NC([C@@H](N)C2CCCCC2)=O)[C@@](C)(C)C)=O)C[C@]3([C@@]1(CCC3)[H])[H]	InChI=1S/C26H45N3O4/c1-25(2,3)21(28-22(30)19(27)16-11-8-7-9-12-16)23(31)29-15-17-13-10-14-18(17)20(29)24(32)33-26(4,5)6/h16-21H,7-15,27H2,1-6H3,(H,28,30)/t17-,18-,19-,20-,21+/m0/s1	CC(C)(C)OC(=O)C1C2CCCC2CN1C(=O)C(NC(=O)C(N)C1CCCCC1)C(C)(C)C	CC(C)(C)OC(=O)C1C2CCCC2CN1C(=O)C(NC(=O)C(N)C1CCCCC1)C(C)(C)C	TRUE	DTXCID00694089	CC(C)(C)OC(=O)C1C2CCCC2CN1C(=O)C(NC(=O)C(N)C1CCCCC1)C(C)(C)C	TRUE	CC(C)(C)C(C(=O)N1CC2CCCC2C1C(=O)OC(C)(C)C)NC(=O)C(C3CCCCC3)N	FALSE	missing stereochemistry	InChI=1S/C26H45N3O4/c1-25(2,3)21(28-22(30)19(27)16-11-8-7-9-12-16)23(31)29-15-17-13-10-14-18(17)20(29)24(32)33-26(4,5)6/h16-21H,7-15,27H2,1-6H3,(H,28,30)	InChI=1S/C26H45N3O4/c1-25(2,3)21(28-22(30)19(27)16-11-8-7-9-12-16)23(31)29-15-17-13-10-14-18(17)20(29)24(32)33-26(4,5)6/h16-21H,7-15,27H2,1-6H3,(H,28,30)	InChI=1S/C26H45N3O4/c1-25(2,3)21(28-22(30)19(27)16-11-8-7-9-12-16)23(31)29-15-17-13-10-14-18(17)20(29)24(32)33-26(4,5)6/h16-21H,7-15,27H2,1-6H3,(H,28,30)	TRUE	TRUE	C(OC(C)(C)C)(=O)[C@H]1N(C([C@@H](NC([C@@H](N)C2CCCCC2)=O)[C@@](C)(C)C)=O)C[C@]3([C@@]1(CCC3)[H])[H]	InChI=1S/C26H45N3O4/c1-25(2,3)21(28-22(30)19(27)16-11-8-7-9-12-16)23(31)29-15-17-13-10-14-18(17)20(29)24(32)33-26(4,5)6/h16-21H,7-15,27H2,1-6H3,(H,28,30)/t17-,18-,19-,20-,21+/m0/s1	FALSE
2540	100.105.265	L-Proline, 4-hydroxy-1-(1-oxohexadecyl)-, hexadecyl ester, (4R)-	CCCCCCCCCCCCCCCCOC(=O)[C@@H]1C[C@@H](O)CN1C(=O)CCCCCCCCCCCCCCC	InChI=1S/C37H71NO4/c1-3-5-7-9-11-13-15-17-19-21-23-25-27-29-31-42-37(41)35-32-34(39)33-38(35)36(40)30-28-26-24-22-20-18-16-14-12-10-8-6-4-2/h34-35,39H,3-33H2,1-2H3/t34-,35+/m1/s1	TRUE			479-990-5	791838-11-4	no	organic	mono-constituent substance	NONS	Tonnage data confidential	CCCCCCCCCCCCCCCCOC(=O)[C@@H]1C[C@@H](O)CN1C(=O)CCCCCCCCCCCCCCC	InChI=1S/C37H71NO4/c1-3-5-7-9-11-13-15-17-19-21-23-25-27-29-31-42-37(41)35-32-34(39)33-38(35)36(40)30-28-26-24-22-20-18-16-14-12-10-8-6-4-2/h34-35,39H,3-33H2,1-2H3/t34-,35+/m1/s1	CCCCCCCCCCCCCCCCOC(=O)C1C[C@@H](O)CN1C(=O)CCCCCCCCCCCCCCC	CCCCCCCCCCCCCCCCOC(=O)C1C[C@@H](O)CN1C(=O)CCCCCCCCCCCCCCC	TRUE	DTXCID30152066	CCCCCCCCCCCCCCCCOC(=O)[C@@H]1C[C@@H](O)CN1C(=O)CCCCCCCCCCCCCCC	FALSE	CCCCCCCCCCCCCCCCOC(=O)[C@@H]1C[C@H](CN1C(=O)CCCCCCCCCCCCCCC)O	OK	missing stereochemistry	InChI=1S/C37H71NO4/c1-3-5-7-9-11-13-15-17-19-21-23-25-27-29-31-42-37(41)35-32-34(39)33-38(35)36(40)30-28-26-24-22-20-18-16-14-12-10-8-6-4-2/h34-35,39H,3-33H2,1-2H3/t34-,35?/m1/s1	InChI=1S/C37H71NO4/c1-3-5-7-9-11-13-15-17-19-21-23-25-27-29-31-42-37(41)35-32-34(39)33-38(35)36(40)30-28-26-24-22-20-18-16-14-12-10-8-6-4-2/h34-35,39H,3-33H2,1-2H3/t34-,35+/m1/s1	InChI=1S/C37H71NO4/c1-3-5-7-9-11-13-15-17-19-21-23-25-27-29-31-42-37(41)35-32-34(39)33-38(35)36(40)30-28-26-24-22-20-18-16-14-12-10-8-6-4-2/h34-35,39H,3-33H2,1-2H3/t34-,35+/m1/s1	FALSE	FALSE
8465	100.100.627	R-2,3-epoxy-1-propanol	OC[C@@H]1CO1	InChI=1S/C3H6O2/c4-1-3-2-5-3/h3-4H,1-2H2/t3-/m1/s1	TRUE			404-660-4	57044-25-4	no	organic	mono-constituent substance	NONS	Tonnage data confidential	OC[C@@H]1CO1	InChI=1S/C3H6O2/c4-1-3-2-5-3/h3-4H,1-2H2/t3-/m1/s1	OCC1CO1	OCC1CO1	TRUE	DTXCID701333819	OC[C@@H]1CO1	FALSE	C1[C@H](O1)CO	FALSE	missing stereochemistry	InChI=1S/C3H6O2/c4-1-3-2-5-3/h3-4H,1-2H2	InChI=1S/C3H6O2/c4-1-3-2-5-3/h3-4H,1-2H2/t3-/m1/s1	InChI=1S/C3H6O2/c4-1-3-2-5-3/h3-4H,1-2H2/t3-/m1/s1	FALSE	FALSE
22340	100.006.352	O-phosphoserine	N[C@@H](COP(O)(O)=O)C(O)=O	InChI=1S/C3H8NO6P/c4-2(3(5)6)1-10-11(7,8)9/h2H,1,4H2,(H,5,6)(H2,7,8,9)/t2-/m0/s1	TRUE			206-986-0	407-41-0	no	organic	mono-constituent substance	FULL	≥ 1 to < 10 tonnes	N[C@@H](COP(O)(O)=O)C(O)=O	InChI=1S/C3H8NO6P/c4-2(3(5)6)1-10-11(7,8)9/h2H,1,4H2,(H,5,6)(H2,7,8,9)/t2-/m0/s1	NC(COP(O)(O)=O)C(O)=O	NC(COP(O)(O)=O)C(O)=O	TRUE	DTXCID9026348	N[C@@H](COP(O)(O)=O)C(O)=O	FALSE	C([C@@H](C(=O)O)N)OP(=O)(O)O	FALSE	missing stereochemistry	InChI=1S/C3H8NO6P/c4-2(3(5)6)1-10-11(7,8)9/h2H,1,4H2,(H,5,6)(H2,7,8,9)	InChI=1S/C3H8NO6P/c4-2(3(5)6)1-10-11(7,8)9/h2H,1,4H2,(H,5,6)(H2,7,8,9)/t2-/m0/s1	InChI=1S/C3H8NO6P/c4-2(3(5)6)1-10-11(7,8)9/h2H,1,4H2,(H,5,6)(H2,7,8,9)/t2-/m0/s1	FALSE	FALSE
21618	100.000.669	Asparagine	N[C@@H](CC(N)=O)C(O)=O	InChI=1S/C4H8N2O3/c5-2(4(8)9)1-3(6)7/h2H,1,5H2,(H2,6,7)(H,8,9)/t2-/m0/s1	TRUE			200-735-9	70-47-3	no	organic	mono-constituent substance	FULL	≥ 100 to < 1000 tonnes	N[C@@H](CC(N)=O)C(O)=O	InChI=1S/C4H8N2O3/c5-2(4(8)9)1-3(6)7/h2H,1,5H2,(H2,6,7)(H,8,9)/t2-/m0/s1	NC(CC(N)=O)C(O)=O	NC(CC(N)=O)C(O)=O	TRUE	DTXCID901022769	N[C@@H](CC(N)=O)C(O)=O	FALSE	C([C@@H](C(=O)O)N)C(=O)N	OK	missing stereochemistry	InChI=1S/C4H8N2O3/c5-2(4(8)9)1-3(6)7/h2H,1,5H2,(H2,6,7)(H,8,9)	InChI=1S/C4H8N2O3/c5-2(4(8)9)1-3(6)7/h2H,1,5H2,(H2,6,7)(H,8,9)/t2-/m0/s1	InChI=1S/C4H8N2O3/c5-2(4(8)9)1-3(6)7/h2H,1,5H2,(H2,6,7)(H,8,9)/t2-/m0/s1	FALSE	FALSE
16986	100.000.704	L-threonine	C[C@@H](O)[C@H](N)C(O)=O	InChI=1S/C4H9NO3/c1-2(6)3(5)4(7)8/h2-3,6H,5H2,1H3,(H,7,8)/t2-,3+/m1/s1	TRUE			200-774-1	72-19-5	no	organic	mono-constituent substance	FULL	≥ 100 to < 1000 tonnes	C[C@@H](O)[C@H](N)C(O)=O	InChI=1S/C4H9NO3/c1-2(6)3(5)4(7)8/h2-3,6H,5H2,1H3,(H,7,8)/t2-,3+/m1/s1	CC(O)[C@H](N)C(O)=O	CC(O)[C@H](N)C(O)=O	TRUE	DTXCID0026412	C[C@@H](O)[C@H](N)C(O)=O	FALSE	C[C@H]([C@@H](C(=O)O)N)O	FALSE	missing stereochemistry	InChI=1S/C4H9NO3/c1-2(6)3(5)4(7)8/h2-3,6H,5H2,1H3,(H,7,8)/t2?,3-/m0/s1	InChI=1S/C4H9NO3/c1-2(6)3(5)4(7)8/h2-3,6H,5H2,1H3,(H,7,8)/t2-,3+/m1/s1	InChI=1S/C4H9NO3/c1-2(6)3(5)4(7)8/h2-3,6H,5H2,1H3,(H,7,8)/t2-,3+/m1/s1	FALSE	FALSE
21207	100.000.084	L-4-hydroxyproline	O[C@H]1CN[C@@H](C1)C(O)=O	InChI=1S/C5H9NO3/c7-3-1-4(5(8)9)6-2-3/h3-4,6-7H,1-2H2,(H,8,9)/t3-,4+/m1/s1	TRUE			200-091-9	51-35-4	no	organic	mono-constituent substance	FULL	≥ 10 to < 100 tonnes	O[C@H]1CN[C@@H](C1)C(O)=O	InChI=1S/C5H9NO3/c7-3-1-4(5(8)9)6-2-3/h3-4,6-7H,1-2H2,(H,8,9)/t3-,4+/m1/s1	OC1CN[C@@H](C1)C(O)=O	OC1CN[C@@H](C1)C(O)=O	TRUE	DTXCID001022774	O[C@H]1CN[C@@H](C1)C(O)=O	FALSE	C1[C@H](CN[C@@H]1C(=O)O)O	OK	missing stereochemistry	InChI=1S/C5H9NO3/c7-3-1-4(5(8)9)6-2-3/h3-4,6-7H,1-2H2,(H,8,9)/t3?,4-/m0/s1	InChI=1S/C5H9NO3/c7-3-1-4(5(8)9)6-2-3/h3-4,6-7H,1-2H2,(H,8,9)/t3-,4+/m1/s1	InChI=1S/C5H9NO3/c7-3-1-4(5(8)9)6-2-3/h3-4,6-7H,1-2H2,(H,8,9)/t3-,4+/m1/s1	FALSE	FALSE
24043	100.009.545	Acetylcysteine	CC(=O)N[C@@H](CS)C(O)=O	InChI=1S/C5H9NO3S/c1-3(7)6-4(2-10)5(8)9/h4,10H,2H2,1H3,(H,6,7)(H,8,9)/t4-/m0/s1	TRUE			210-498-3	616-91-1	no	organic	mono-constituent substance	FULL	≥ 1 to < 10 tonnes	CC(=O)N[C@@H](CS)C(O)=O	InChI=1S/C5H9NO3S/c1-3(7)6-4(2-10)5(8)9/h4,10H,2H2,1H3,(H,6,7)(H,8,9)/t4-/m0/s1	CC(=O)NC(CS)C(O)=O	CC(=O)NC(CS)C(O)=O	TRUE	DTXCID4021	CC(=O)N[C@@H](CS)C(O)=O	FALSE	CC(=O)N[C@@H](CS)C(=O)O	OK	missing stereochemistry	InChI=1S/C5H9NO3S/c1-3(7)6-4(2-10)5(8)9/h4,10H,2H2,1H3,(H,6,7)(H,8,9)	InChI=1S/C5H9NO3S/c1-3(7)6-4(2-10)5(8)9/h4,10H,2H2,1H3,(H,6,7)(H,8,9)/t4-/m0/s1	InChI=1S/C5H9NO3S/c1-3(7)6-4(2-10)5(8)9/h4,10H,2H2,1H3,(H,6,7)(H,8,9)/t4-/m0/s1	FALSE	FALSE
12560	100.000.267	Glutamic acid	N[C@@H](CCC(O)=O)C(O)=O	InChI=1S/C5H9NO4/c6-3(5(9)10)1-2-4(7)8/h3H,1-2,6H2,(H,7,8)(H,9,10)/t3-/m0/s1	TRUE			200-293-7	56-86-0	no	organic	mono-constituent substance	FULL	≥ 100 to < 1000 tonnes	N[C@@H](CCC(O)=O)C(O)=O	InChI=1S/C5H9NO4/c6-3(5(9)10)1-2-4(7)8/h3H,1-2,6H2,(H,7,8)(H,9,10)/t3-/m0/s1	NC(CCC(O)=O)C(O)=O	NC(CCC(O)=O)C(O)=O	TRUE	DTXCID30659	N[C@@H](CCC(O)=O)C(O)=O	FALSE	C(CC(=O)O)[C@@H](C(=O)O)N	FALSE	missing stereochemistry	InChI=1S/C5H9NO4/c6-3(5(9)10)1-2-4(7)8/h3H,1-2,6H2,(H,7,8)(H,9,10)	InChI=1S/C5H9NO4/c6-3(5(9)10)1-2-4(7)8/h3H,1-2,6H2,(H,7,8)(H,9,10)/t3-/m0/s1	InChI=1S/C5H9NO4/c6-3(5(9)10)1-2-4(7)8/h3H,1-2,6H2,(H,7,8)(H,9,10)/t3-/m0/s1	FALSE	FALSE
20720	100.000.726	L-isoleucine	CC[C@H](C)[C@H](N)C(O)=O	InChI=1S/C6H13NO2/c1-3-4(2)5(7)6(8)9/h4-5H,3,7H2,1-2H3,(H,8,9)/t4-,5-/m0/s1	TRUE			200-798-2	73-32-5	no	organic	mono-constituent substance	FULL	≥ 10 to < 100 tonnes	CC[C@H](C)[C@H](N)C(O)=O	InChI=1S/C6H13NO2/c1-3-4(2)5(7)6(8)9/h4-5H,3,7H2,1-2H3,(H,8,9)/t4-,5-/m0/s1	CCC(C)[C@H](N)C(O)=O	CCC(C)[C@H](N)C(O)=O	TRUE	DTXCID9027441	CC[C@H](C)[C@H](N)C(O)=O	FALSE	CC[C@H](C)[C@@H](C(=O)O)N	FALSE	missing stereochemistry	InChI=1S/C6H13NO2/c1-3-4(2)5(7)6(8)9/h4-5H,3,7H2,1-2H3,(H,8,9)/t4?,5-/m0/s1	InChI=1S/C6H13NO2/c1-3-4(2)5(7)6(8)9/h4-5H,3,7H2,1-2H3,(H,8,9)/t4-,5-/m0/s1	InChI=1S/C6H13NO2/c1-3-4(2)5(7)6(8)9/h4-5H,3,7H2,1-2H3,(H,8,9)/t4-,5-/m0/s1	FALSE	FALSE
14658	100.102.992	L-Valine, N-(methoxycarbonyl)-3-methyl-	COC(=O)N[C@H](C(O)=O)C(C)(C)C	InChI=1S/C8H15NO4/c1-8(2,3)5(6(10)11)9-7(12)13-4/h5H,1-4H3,(H,9,12)(H,10,11)/t5-/m1/s1	TRUE			431-620-3	162537-11-3	no	organic	mono-constituent substance	FULL	≥ 10 tonnes	[C@H](NC(OC)=O)(C(C)(C)C)C(O)=O	InChI=1S/C8H15NO4/c1-8(2,3)5(6(10)11)9-7(12)13-4/h5H,1-4H3,(H,9,12)(H,10,11)/t5-/m1/s1	COC(=O)NC(C(O)=O)C(C)(C)C	COC(=O)NC(C(O)=O)C(C)(C)C	TRUE	DTXCID70411285	COC(=O)N[C@H](C(O)=O)C(C)(C)C	FALSE	CC(C)(C)[C@@H](C(=O)O)NC(=O)OC	FALSE	missing stereochemistry	InChI=1S/C8H15NO4/c1-8(2,3)5(6(10)11)9-7(12)13-4/h5H,1-4H3,(H,9,12)(H,10,11)	InChI=1S/C8H15NO4/c1-8(2,3)5(6(10)11)9-7(12)13-4/h5H,1-4H3,(H,9,12)(H,10,11)/t5-/m1/s1	InChI=1S/C8H15NO4/c1-8(2,3)5(6(10)11)9-7(12)13-4/h5H,1-4H3,(H,9,12)(H,10,11)/t5-/m1/s1	FALSE	FALSE	[C@H](NC(OC)=O)(C(C)(C)C)C(O)=O
9882	100.103.971	D-Serine, N-[(1,1-dimethylethoxy)carbonyl]-	CC(C)(C)OC(=O)N[C@H](CO)C(O)=O	InChI=1S/C8H15NO5/c1-8(2,3)14-7(13)9-5(4-10)6(11)12/h5,10H,4H2,1-3H3,(H,9,13)(H,11,12)/t5-/m1/s1	TRUE			444-670-6	6368-20-3	no	organic	mono-constituent substance	INTERMEDIATE	Intermediate use only	CC(C)(C)OC(=O)N[C@H](CO)C(O)=O	InChI=1S/C8H15NO5/c1-8(2,3)14-7(13)9-5(4-10)6(11)12/h5,10H,4H2,1-3H3,(H,9,13)(H,11,12)/t5-/m1/s1	CC(C)(C)OC(=O)NC(CO)C(O)=O	CC(C)(C)OC(=O)NC(CO)C(O)=O	TRUE		CC(C)(C)OC(=O)N[C@H](CO)C(O)=O	FALSE	CC(C)(C)OC(=O)N[C@H](CO)C(=O)O	FALSE	missing stereochemistry	InChI=1S/C8H15NO5/c1-8(2,3)14-7(13)9-5(4-10)6(11)12/h5,10H,4H2,1-3H3,(H,9,13)(H,11,12)	InChI=1S/C8H15NO5/c1-8(2,3)14-7(13)9-5(4-10)6(11)12/h5,10H,4H2,1-3H3,(H,9,13)(H,11,12)/t5-/m1/s1	InChI=1S/C8H15NO5/c1-8(2,3)14-7(13)9-5(4-10)6(11)12/h5,10H,4H2,1-3H3,(H,9,13)(H,11,12)/t5-/m1/s1	FALSE	FALSE
5139	100.103.525	5-Thia-1-azabicyclo[4.2.0]oct-2-ene-2-carboxylic acid, 7-amino-3-ethenyl-8-oxo-, (6R,7R)-	N[C@H]1[C@H]2SCC(C=C)=C(N2C1=O)C(O)=O	InChI=1S/C9H10N2O3S/c1-2-4-3-15-8-5(10)7(12)11(8)6(4)9(13)14/h2,5,8H,1,3,10H2,(H,13,14)/t5-,8-/m1/s1	TRUE			438-350-5	79349-82-9	no	organic	mono-constituent substance	NONS	Tonnage data confidential	N[C@H]1[C@H]2SCC(C=C)=C(N2C1=O)C(O)=O	InChI=1S/C9H10N2O3S/c1-2-4-3-15-8-5(10)7(12)11(8)6(4)9(13)14/h2,5,8H,1,3,10H2,(H,13,14)/t5-,8-/m1/s1	N[C@H]1C2SCC(C=C)=C(N2C1=O)C(O)=O	N[C@H]1C2SCC(C=C)=C(N2C1=O)C(O)=O	TRUE	DTXCID10379335	N[C@H]1[C@H]2SCC(C=C)=C(N2C1=O)C(O)=O	FALSE	C=CC1=C(N2[C@@H]([C@@H](C2=O)N)SC1)C(=O)O	OK	missing stereochemistry	InChI=1S/C9H10N2O3S/c1-2-4-3-15-8-5(10)7(12)11(8)6(4)9(13)14/h2,5,8H,1,3,10H2,(H,13,14)/t5-,8?/m1/s1	InChI=1S/C9H10N2O3S/c1-2-4-3-15-8-5(10)7(12)11(8)6(4)9(13)14/h2,5,8H,1,3,10H2,(H,13,14)/t5-,8-/m1/s1	InChI=1S/C9H10N2O3S/c1-2-4-3-15-8-5(10)7(12)11(8)6(4)9(13)14/h2,5,8H,1,3,10H2,(H,13,14)/t5-,8-/m1/s1	FALSE	FALSE
24422	100.000.419	Tyrosine	N[C@@H](CC1=CC=C(O)C=C1)C(O)=O	InChI=1S/C9H11NO3/c10-8(9(12)13)5-6-1-3-7(11)4-2-6/h1-4,8,11H,5,10H2,(H,12,13)/t8-/m0/s1	TRUE			200-460-4	60-18-4	no	organic	mono-constituent substance	FULL	≥ 1 to < 10 tonnes	N[C@@H](CC1=CC=C(O)C=C1)C(O)=O	InChI=1S/C9H11NO3/c10-8(9(12)13)5-6-1-3-7(11)4-2-6/h1-4,8,11H,5,10H2,(H,12,13)/t8-/m0/s1	NC(CC1=CC=C(O)C=C1)C(O)=O	NC(CC1=CC=C(O)C=C1)C(O)=O	TRUE	DTXCID603730	N[C@@H](CC1=CC=C(O)C=C1)C(O)=O	FALSE	C1=CC(=CC=C1C[C@@H](C(=O)O)N)O	OK	missing stereochemistry	InChI=1S/C9H11NO3/c10-8(9(12)13)5-6-1-3-7(11)4-2-6/h1-4,8,11H,5,10H2,(H,12,13)	InChI=1S/C9H11NO3/c10-8(9(12)13)5-6-1-3-7(11)4-2-6/h1-4,8,11H,5,10H2,(H,12,13)/t8-/m0/s1	InChI=1S/C9H11NO3/c10-8(9(12)13)5-6-1-3-7(11)4-2-6/h1-4,8,11H,5,10H2,(H,12,13)/t8-/m0/s1	FALSE	FALSE
9151	100.102.921	(S)-3-methyl-2-(2-oxotetrahydropyrimidine-1-yl)butyric acid	CC(C)[C@H](N1CCCNC1=O)C(O)=O	InChI=1S/C9H16N2O3/c1-6(2)7(8(12)13)11-5-3-4-10-9(11)14/h6-7H,3-5H2,1-2H3,(H,10,14)(H,12,13)/t7-/m0/s1	TRUE			430-900-2	192725-50-1	no	organic	mono-constituent substance	NONS	Tonnage data confidential	CC(C)[C@H](N1CCCNC1=O)C(O)=O	InChI=1S/C9H16N2O3/c1-6(2)7(8(12)13)11-5-3-4-10-9(11)14/h6-7H,3-5H2,1-2H3,(H,10,14)(H,12,13)/t7-/m0/s1	CC(C)C(N1CCCNC1=O)C(O)=O	CC(C)C(N1CCCNC1=O)C(O)=O	TRUE	DTXCID10398864	CC(C)[C@H](N1CCCNC1=O)C(O)=O	FALSE	CC(C)[C@@H](C(=O)O)N1CCCNC1=O	OK	missing stereochemistry	InChI=1S/C9H16N2O3/c1-6(2)7(8(12)13)11-5-3-4-10-9(11)14/h6-7H,3-5H2,1-2H3,(H,10,14)(H,12,13)	InChI=1S/C9H16N2O3/c1-6(2)7(8(12)13)11-5-3-4-10-9(11)14/h6-7H,3-5H2,1-2H3,(H,10,14)(H,12,13)/t7-/m0/s1	InChI=1S/C9H16N2O3/c1-6(2)7(8(12)13)11-5-3-4-10-9(11)14/h6-7H,3-5H2,1-2H3,(H,10,14)(H,12,13)/t7-/m0/s1	FALSE	FALSE
9307	100.100.566	R-(+)-2-(2,4-dichlorophenoxy)propionic acid	C[C@@H](OC1=C(Cl)C=C(Cl)C=C1)C(O)=O	InChI=1S/C9H8Cl2O3/c1-5(9(12)13)14-8-3-2-6(10)4-7(8)11/h2-5H,1H3,(H,12,13)/t5-/m1/s1	TRUE			403-980-1	15165-67-0	no	organic	mono-constituent substance	NONS	Tonnage data confidential	C[C@@H](OC1=C(Cl)C=C(Cl)C=C1)C(O)=O	InChI=1S/C9H8Cl2O3/c1-5(9(12)13)14-8-3-2-6(10)4-7(8)11/h2-5H,1H3,(H,12,13)/t5-/m1/s1	CC(OC1=CC=C(Cl)C=C1Cl)C(O)=O	CC(OC1=CC=C(Cl)C=C1Cl)C(O)=O	TRUE	DTXCID8014851	C[C@@H](OC1=C(Cl)C=C(Cl)C=C1)C(O)=O	FALSE	C[C@H](C(=O)O)OC1=C(C=C(C=C1)Cl)Cl	OK	missing stereochemistry	InChI=1S/C9H8Cl2O3/c1-5(9(12)13)14-8-3-2-6(10)4-7(8)11/h2-5H,1H3,(H,12,13)	InChI=1S/C9H8Cl2O3/c1-5(9(12)13)14-8-3-2-6(10)4-7(8)11/h2-5H,1H3,(H,12,13)/t5-/m1/s1	InChI=1S/C9H8Cl2O3/c1-5(9(12)13)14-8-3-2-6(10)4-7(8)11/h2-5H,1H3,(H,12,13)/t5-/m1/s1	FALSE	FALSE
21596	100.101.832	Olean-12-en-29-oic acid, 3-hydroxy-11-oxo-, octadecyl ester, (3.beta.,20.beta.)-	-					419-580-5	13832-70-7	no	organic	mono-constituent substance	FULL	≥ 1 to < 10 tonnes	CCCCCCCCCCCCCCCCCCOC(=O)[C@]1(CC[C@@]2(CC[C@@]3(C(=CC(=O)[C@H]4[C@]3(CC[C@@H]5[C@@]4(CC[C@@H](C5(C)C)O)C)C)[C@@H]2C1)C)C)C		[H][C@@]12C[C@](C)(CC[C@]1(C)CC[C@]1(C)C2=CC(=O)C2[C@@]3(C)CC[C@H](O)C(C)(C)[C@]3([H])CC[C@@]12C)C(=O)OCCCCCCCCCCCCCCCCCC	[H][C@@]12C[C@](C)(CC[C@]1(C)CC[C@]1(C)C2=CC(=O)C2[C@@]3(C)CC[C@H](O)C(C)(C)[C@]3([H])CC[C@@]12C)C(=O)OCCCCCCCCCCCCCCCCCC	TRUE				CCCCCCCCCCCCCCCCCCOC(=O)[C@]1(CC[C@@]2(CC[C@@]3(C(=CC(=O)[C@H]4[C@]3(CC[C@@H]5[C@@]4(CC[C@@H](C5(C)C)O)C)C)[C@@H]2C1)C)C)C	FALSE	missing stereochemistry (at one atom)	InChI=1S/C48H82O4/c1-9-10-11-12-13-14-15-16-17-18-19-20-21-22-23-24-33-52-42(51)45(5)30-29-44(4)31-32-47(7)36(37(44)35-45)34-38(49)41-46(6)27-26-40(50)43(2,3)39(46)25-28-48(41,47)8/h34,37,39-41,50H,9-33,35H2,1-8H3/t37-,39-,40-,41?,44+,45-,46-,47+,48+/m0/s1		InChI=1S/C48H82O4/c1-9-10-11-12-13-14-15-16-17-18-19-20-21-22-23-24-33-52-42(51)45(5)30-29-44(4)31-32-47(7)36(37(44)35-45)34-38(49)41-46(6)27-26-40(50)43(2,3)39(46)25-28-48(41,47)8/h34,37,39-41,50H,9-33,35H2,1-8H3/t37-,39-,40-,41+,44+,45-,46-,47+,48+/m0/s1		FALSE
12868	100.100.721	L-Proline, N2-[(1S)-1-(ethoxycarbonyl)-3-phenylpropyl]-N6-(2,2,2-trifluoroacetyl)-L-lysyl-	CCOC(=O)[C@H](CCC1=CC=CC=C1)N[C@@H](CCCCNC(=O)C(F)(F)F)C(=O)N1CCC[C@H]1C(O)=O	InChI=1S/C25H34F3N3O6/c1-2-37-23(35)19(14-13-17-9-4-3-5-10-17)30-18(11-6-7-15-29-24(36)25(26,27)28)21(32)31-16-8-12-20(31)22(33)34/h3-5,9-10,18-20,30H,2,6-8,11-16H2,1H3,(H,29,36)(H,33,34)/t18-,19-,20-/m0/s1	TRUE			405-650-2	103300-91-0	no	organic	mono-constituent substance	NONS	Tonnage data confidential	C([C@@H](N[C@@H](CCC1=CC=CC=C1)C(OCC)=O)CCCCNC(C(F)(F)F)=O)(=O)N2[C@H](C(O)=O)CCC2	InChI=1S/C25H34F3N3O6/c1-2-37-23(35)19(14-13-17-9-4-3-5-10-17)30-18(11-6-7-15-29-24(36)25(26,27)28)21(32)31-16-8-12-20(31)22(33)34/h3-5,9-10,18-20,30H,2,6-8,11-16H2,1H3,(H,29,36)(H,33,34)/t18-,19-,20-/m0/s1	CCOC(=O)C(CCC1=CC=CC=C1)NC(CCCCNC(=O)C(F)(F)F)C(=O)N1CCCC1C(O)=O	CCOC(=O)C(CCC1=CC=CC=C1)NC(CCCCNC(=O)C(F)(F)F)C(=O)N1CCCC1C(O)=O	TRUE				CCOC(=O)C(CCC1=CC=CC=C1)NC(CCCCNC(=O)C(F)(F)F)C(=O)N2CCCC2C(=O)O	OK	missing sterochemistry	InChI=1S/C25H34F3N3O6/c1-2-37-23(35)19(14-13-17-9-4-3-5-10-17)30-18(11-6-7-15-29-24(36)25(26,27)28)21(32)31-16-8-12-20(31)22(33)34/h3-5,9-10,18-20,30H,2,6-8,11-16H2,1H3,(H,29,36)(H,33,34)		InChI=1S/C25H34F3N3O6/c1-2-37-23(35)19(14-13-17-9-4-3-5-10-17)30-18(11-6-7-15-29-24(36)25(26,27)28)21(32)31-16-8-12-20(31)22(33)34/h3-5,9-10,18-20,30H,2,6-8,11-16H2,1H3,(H,29,36)(H,33,34)		TRUE	C([C@@H](N[C@@H](CCC1=CC=CC=C1)C(OCC)=O)CCCCNC(C(F)(F)F)=O)(=O)N2[C@H](C(O)=O)CCC2	InChI=1S/C25H34F3N3O6/c1-2-37-23(35)19(14-13-17-9-4-3-5-10-17)30-18(11-6-7-15-29-24(36)25(26,27)28)21(32)31-16-8-12-20(31)22(33)34/h3-5,9-10,18-20,30H,2,6-8,11-16H2,1H3,(H,29,36)(H,33,34)/t18-,19-,20-/m0/s1	FALSE
9494	100.103.676	Amines, bis(hydrogenated rape oilalkyl)methyl, N-oxides	-					440-250-1	204933-93-7	no	organic	mono-constituent substance	NONS	Tonnage data confidential			CCCCCCCCCCCCCCCCCCCCCCCC[N](C)(O)CCCCCCCCCCCCCC	CCCCCCCCCCCCCCCCCCCCCCCC[N](C)(O)CCCCCCCCCCCCCC	TRUE						OpenBabel: Accepted Unusal Valence	InChI=1S/C39H82NO/c1-4-6-8-10-12-14-16-18-19-20-21-22-23-24-25-26-27-29-31-33-35-37-39-40(3,41)38-36-34-32-30-28-17-15-13-11-9-7-5-2/h41H,4-39H2,1-3H3
23846	100.115.526	1-Octanamine, N,N-dimethyl-, N-oxide	CCCCCCCC[N+](C)(C)[O-]	InChI=1S/C10H23NO/c1-4-5-6-7-8-9-10-11(2,3)12/h4-10H2,1-3H3	TRUE			607-854-9	2605-78-9	no	organic	mono-constituent substance	FULL	≥ 1 to < 10 tonnes	CCCCCCCC[N+](C)(C)[O-]	InChI=1S/C10H23NO/c1-4-5-6-7-8-9-10-11(2,3)12/h4-10H2,1-3H3	CCCCCCCC[N](C)(C)O	CCCCCCCC[N](C)(C)O	TRUE	DTXCID9022239	CCCCCCCC[N+](C)(C)[O-]	FALSE	CCCCCCCC[N+](C)(C)[O-]	TRUE	OpenBabel: Accepted Unusal Valence	InChI=1S/C10H24NO/c1-4-5-6-7-8-9-10-11(2,3)12/h12H,4-10H2,1-3H3	InChI=1S/C10H23NO/c1-4-5-6-7-8-9-10-11(2,3)12/h4-10H2,1-3H3	InChI=1S/C10H23NO/c1-4-5-6-7-8-9-10-11(2,3)12/h4-10H2,1-3H3	FALSE	FALSE
4508	100.101.266	α[2-[[[(2-hydroxyethyl)methylamino]acetyl]amino]propyl]-γ-(nonylphenoxy)poly[oxo(methyl-1,2-ethanediyl)]	-					413-420-8	144736-29-8	no	organic	mono-constituent substance	NONS	Tonnage data confidential	polymer		CCCCCCCCCC1=CC=C(OCC(C)OCC(C)NC(=O)CN(C)CCO)C=C1	CCCCCCCCCC1=CC=C(OCC(C)OCC(C)NC(=O)CN(C)CCO)C=C1	TRUE						polymer	InChI=1S/C26H46N2O4/c1-5-6-7-8-9-10-11-12-24-13-15-25(16-14-24)32-21-23(3)31-20-22(2)27-26(30)19-28(4)17-18-29/h13-16,22-23,29H,5-12,17-21H2,1-4H3,(H,27,30)
12934	100.102.504	POLYAMIDE RESIN	-					426-580-9		no	organic	mono-constituent substance	NONS	Tonnage data confidential	polymer		OC(=O)C1C2CCC(C2)C1C(=O)NC1=C(O)C=CC(=C1)C(C1=CC(NC(=O)C2=CC=C(OC3=CC=C(C=C3)C(=O)NC3=C(O)C=CC(=C3)C(C3=CC(NC(=O)C4C5CCC(C5)C4C(O)=O)=C(O)C=C3)(C(F)(F)F)C(F)(F)F)C=C2)=C(O)C=C1)(C(F)(F)F)C(F)(F)F	OC(=O)C1C2CCC(C2)C1C(=O)NC1=C(O)C=CC(=C1)C(C1=CC(NC(=O)C2=CC=C(OC3=CC=C(C=C3)C(=O)NC3=C(O)C=CC(=C3)C(C3=CC(NC(=O)C4C5CCC(C5)C4C(O)=O)=C(O)C=C3)(C(F)(F)F)C(F)(F)F)C=C2)=C(O)C=C1)(C(F)(F)F)C(F)(F)F	TRUE						polymer (according to name)	InChI=1S/C62H50F12N4O13/c63-59(64,65)57(60(66,67)68,35-11-19-45(81)41(25-35)77-53(85)47-29-1-3-31(21-29)49(47)55(87)88)33-9-17-43(79)39(23-33)75-51(83)27-5-13-37(14-6-27)91-38-15-7-28(8-16-38)52(84)76-40-24-34(10-18-44(40)80)58(61(69,70)71,62(72,73)74)36-12-20-46(82)42(26-36)78-54(86)48-30-2-4-32(22-30)50(48)56(89)90/h5-20,23-26,29-32,47-50,79-82H,1-4,21-22H2,(H,75,83)(H,76,84)(H,77,85)(H,78,86)(…
9928	100.103.517	Dioctyldodecyl Dimer Dilinoleate	CCCCCCCCCCC(CCCCCCCC)COC(=O)CCCCCCCCCCCCCCCCC=CCCCCCCCCCCCCCCCCC(=O)OCC(CCCCCCCC)CCCCCCCCCC	InChI=1S/C76H148O4/c1-5-9-13-17-21-49-55-61-67-73(65-59-53-19-15-11-7-3)71-79-75(77)69-63-57-51-47-45-43-41-39-37-35-33-31-29-27-25-23-24-26-28-30-32-34-36-38-40-42-44-46-48-52-58-64-70-76(78)80-72-74(66-60-54-20-16-12-8-4)68-62-56-50-22-18-14-10-6-2/h23-24,73-74H,5-22,25-72H2,1-4H3	FALSE	FALSE	inconsistent structure	438-100-5	129423-60-5	no	organic	mono-constituent substance	NONS	Tonnage data confidential	C(COC(CCCCCCC/C=C\C/C=C\CCCCC)=O)(CCCCCCCCCC)CCCCCCCC	InChI=1S/C38H72O2/c1-4-7-10-13-16-18-19-20-21-22-23-24-26-29-32-35-38(39)40-36-37(33-30-27-15-12-9-6-3)34-31-28-25-17-14-11-8-5-2/h16,18,20-21,37H,4-15,17,19,22-36H2,1-3H3/b18-16-,21-20-	CCCCCCCCCCC(CCCCCCCC)COC(=O)CCCCCCC\C=C\C\C=C/CCCCC	CCCCCCCCCCC(CCCCCCCC)COC(=O)CCCCCCC\C=C\C\C=C/CCCCC	TRUE		CCCCCCCCCCC(CCCCCCCC)COC(=O)CCCCCCCCCCCCCCCC\C=C/CCCCCCCCCCCCCCCCC(=O)OCC(CCCCCCCC)CCCCCCCCCC	FALSE	CCCCCCCCCCC(CCCCCCCC)COC(=O)CCCCCCCCCCCCCCCC/C=C\CCCCCCCCCCCCCCCCC(=O)OCC(CCCCCCCC)CCCCCCCCCC	FALSE	R: deviating cis/trans isomer/ C+P: unclear if this is the correct structure	InChI=1S/C38H72O2/c1-4-7-10-13-16-18-19-20-21-22-23-24-26-29-32-35-38(39)40-36-37(33-30-27-15-12-9-6-3)34-31-28-25-17-14-11-8-5-2/h16,18,20-21,37H,4-15,17,19,22-36H2,1-3H3/b18-16-,21-20+	InChI=1S/C76H148O4/c1-5-9-13-17-21-49-55-61-67-73(65-59-53-19-15-11-7-3)71-79-75(77)69-63-57-51-47-45-43-41-39-37-35-33-31-29-27-25-23-24-26-28-30-32-34-36-38-40-42-44-46-48-52-58-64-70-76(78)80-72-74(66-60-54-20-16-12-8-4)68-62-56-50-22-18-14-10-6-2/h23-24,73-74H,5-22,25-72H2,1-4H3/b24-23-	InChI=1S/C76H148O4/c1-5-9-13-17-21-49-55-61-67-73(65-59-53-19-15-11-7-3)71-79-75(77)69-63-57-51-47-45-43-41-39-37-35-33-31-29-27-25-23-24-26-28-30-32-34-36-38-40-42-44-46-48-52-58-64-70-76(78)80-72-74(66-60-54-20-16-12-8-4)68-62-56-50-22-18-14-10-6-2/h23-24,73-74H,5-22,25-72H2,1-4H3/b24-23-	FALSE	FALSE
27171	100.106.283	4-trans-Butyl-4'-trans-propyl-[1,1'-bicyclohexyl]	CCCCC1CCC(CC1)C1CCC(CCC)CC1	InChI=1S/C19H36/c1-3-5-7-17-10-14-19(15-11-17)18-12-8-16(6-4-2)9-13-18/h16-19H,3-15H2,1-2H3	FALSE	FALSE	missing stereochemistry	619-232-4	96624-52-1	no	organic	mono-constituent substance	FULL	≥ 0 to < 10 tonnes	C(CCC)[C@H]1CC[C@@](CC1)([C@]2(CC[C@H](CCC)CC2)[H])[H]	InChI=1S/C19H36/c1-3-5-7-17-10-14-19(15-11-17)18-12-8-16(6-4-2)9-13-18/h16-19H,3-15H2,1-2H3/t16-,17-,18-,19-	[H][C@]1(CC[C@H](CCC)CC1)[C@]1([H])CC[C@H](CCCC)CC1	[H][C@]1(CC[C@H](CCC)CC1)[C@]1([H])CC[C@H](CCCC)CC1	TRUE	DTXCID60405577	CCCCC1CCC(CC1)C1CCC(CCC)CC1		CCCCC1CCC(CC1)C2CCC(CC2)CCC		R: deviating stereochemistry / C/P: missing stereochemistry	InChI=1S/C19H36/c1-3-5-7-17-10-14-19(15-11-17)18-12-8-16(6-4-2)9-13-18/h16-19H,3-15H2,1-2H3/t16-,17-,18+,19+	InChI=1S/C19H36/c1-3-5-7-17-10-14-19(15-11-17)18-12-8-16(6-4-2)9-13-18/h16-19H,3-15H2,1-2H3	InChI=1S/C19H36/c1-3-5-7-17-10-14-19(15-11-17)18-12-8-16(6-4-2)9-13-18/h16-19H,3-15H2,1-2H3	FALSE	TRUE	C(CCC)[C@H]1CC[C@@](CC1)([C@]2(CC[C@H](CCC)CC2)[H])[H]
18114	100.224.921	1,4:5,8-Dimethanonaphthalene, 1,2,3,4,4a,5,8,8a-octahydro-, (1R,4S,4aR,5S,8R,8aS)-rel-	-					700-678-4	1076-12-6	no	organic	mono-constituent substance	FULL	≥ 100 to < 1000 tonnes	[C@]12([C@@]([C@H]3C[C@@H]1C=C3)([C@@H]4C[C@H]2CC4)[H])[H]		[H][C@@]12[C@H]3CC[C@H](C3)[C@]1([H])[C@H]1C[C@@H]2C=C1	[H][C@@]12[C@H]3CC[C@H](C3)[C@]1([H])[C@H]1C[C@@H]2C=C1	TRUE	DTXCID101339421	C1CC2CC1C1C3CC(C=C3)C21	FALSE	C1CC2CC1C3C2C4CC3C=C4	FALSE	R: deviating stereochemistry/ C/P: missing stereochemsitry	InChI=1S/C12H16/c1-2-8-5-7(1)11-9-3-4-10(6-9)12(8)11/h1-2,7-12H,3-6H2/t7-,8+,9-,10+,11+,12-	InChI=1S/C12H16/c1-2-8-5-7(1)11-9-3-4-10(6-9)12(8)11/h1-2,7-12H,3-6H2	InChI=1S/C12H16/c1-2-8-5-7(1)11-9-3-4-10(6-9)12(8)11/h1-2,7-12H,3-6H2	FALSE	FALSE	[C@]12([C@@]([C@H]3C[C@@H]1C=C3)([C@@H]4C[C@H]2CC4)[H])[H]
9730	100.101.967	N-[N-[(1,1-dimethylethoxy)carbonyl]-L-alanyl]-L-alanine	C[C@H](NC(=O)[C@H](C)NC(=O)OC(C)(C)C)C(O)=O	InChI=1S/C11H20N2O5/c1-6(8(14)12-7(2)9(15)16)13-10(17)18-11(3,4)5/h6-7H,1-5H3,(H,12,14)(H,13,17)(H,15,16)/t6-,7-/m0/s1	TRUE			421-060-8	27317-69-7	no	organic	mono-constituent substance	NONS	Tonnage data confidential	N([C@H](C(N[C@H](C(O)=O)C)=O)C)C(OC(C)(C)C)=O	InChI=1S/C11H20N2O5/c1-6(8(14)12-7(2)9(15)16)13-10(17)18-11(3,4)5/h6-7H,1-5H3,(H,12,14)(H,13,17)(H,15,16)/t6-,7-/m0/s1	C[C@@H](NC(=O)[C@@H](C)NC(=O)OC(C)(C)C)C(O)=O	C[C@@H](NC(=O)[C@@H](C)NC(=O)OC(C)(C)C)C(O)=O	TRUE	DTXCID801378204	CC(N=C(O)C(C)N=C(O)OC(C)(C)C)C(O)=O	FALSE	C[C@@H](C(=O)N[C@@H](C)C(=O)O)NC(=O)OC(C)(C)C	FALSE	R: deviating stereochemistry/ C: missing stereochemsitry	InChI=1S/C11H20N2O5/c1-6(8(14)12-7(2)9(15)16)13-10(17)18-11(3,4)5/h6-7H,1-5H3,(H,12,14)(H,13,17)(H,15,16)/t6-,7-/m1/s1	InChI=1S/C11H20N2O5/c1-6(8(14)12-7(2)9(15)16)13-10(17)18-11(3,4)5/h6-7H,1-5H3,(H,12,14)(H,13,17)(H,15,16)	InChI=1S/C11H20N2O5/c1-6(8(14)12-7(2)9(15)16)13-10(17)18-11(3,4)5/h6-7H,1-5H3,(H,12,14)(H,13,17)(H,15,16)/t6-,7-/m0/s1	FALSE	FALSE	N([C@H](C(N[C@H](C(O)=O)C)=O)C)C(OC(C)(C)C)=O
31884	100.105.186	Cyclohexanepropanol, 2,2,3,6-tetramethyl-.alpha.-propyl-	-					478-330-3	95851-08-4	no	organic	mono-constituent substance	FULL	≥ 1 to < 10 tonnes	CCCC(O)CCC1C(C)CCC(C)C1(C)C		[H][C@]1(C)CC[C@]([H])(C)C(C)(C)[C@]1([H])CCC(O)CCC	[H][C@]1(C)CC[C@]([H])(C)C(C)(C)[C@]1([H])CCC(O)CCC	TRUE	DTXCID0031215	CCCC(O)CCC1C(C)CCC(C)C1(C)C	FALSE	CCCC(CCC1C(CCC(C1(C)C)C)C)O	FALSE	SciFinder has no stereochemistry	InChI=1S/C16H32O/c1-6-7-14(17)10-11-15-12(2)8-9-13(3)16(15,4)5/h12-15,17H,6-11H2,1-5H3/t12-,13-,14?,15+/m0/s1	InChI=1S/C16H32O/c1-6-7-14(17)10-11-15-12(2)8-9-13(3)16(15,4)5/h12-15,17H,6-11H2,1-5H3	InChI=1S/C16H32O/c1-6-7-14(17)10-11-15-12(2)8-9-13(3)16(15,4)5/h12-15,17H,6-11H2,1-5H3	FALSE	FALSE
8941	100.103.316	(1R,4aS,8R,8aS)-2,2,6,8-tetramethyl-1,2,3,4,4a,5,8,8a-octahydronaphthalen-1-ol	C[C@@H]1C=C(C)C[C@@H]2CCC(C)(C)[C@H](O)[C@H]12	InChI=1S/C14H24O/c1-9-7-10(2)12-11(8-9)5-6-14(3,4)13(12)15/h7,10-13,15H,5-6,8H2,1-4H3/t10-,11+,12-,13-/m1/s1	FALSE	TRUE		434-960-0	103614-86-4	no	organic	mono-constituent substance	NONS	Tonnage data confidential	CC1C=C(C)CC2CCC(C)(C)C(O)C12	InChI=1S/C14H24O/c1-9-7-10(2)12-11(8-9)5-6-14(3,4)13(12)15/h7,10-13,15H,5-6,8H2,1-4H3	[H][C@@]12CCC(C)(C)[C@H](O)[C@]1([H])[C@H](C)C=C(C)C2	[H][C@@]12CCC(C)(C)[C@H](O)[C@]1([H])[C@H](C)C=C(C)C2	TRUE	DTXCID7030068	CC1C=C(C)CC2CCC(C)(C)C(O)C12	FALSE	CC1C=C(CC2C1C(C(CC2)(C)C)O)C	OK	SciFinder has no stereochemistry	InChI=1S/C14H24O/c1-9-7-10(2)12-11(8-9)5-6-14(3,4)13(12)15/h7,10-13,15H,5-6,8H2,1-4H3/t10-,11+,12-,13-/m1/s1	InChI=1S/C14H24O/c1-9-7-10(2)12-11(8-9)5-6-14(3,4)13(12)15/h7,10-13,15H,5-6,8H2,1-4H3	InChI=1S/C14H24O/c1-9-7-10(2)12-11(8-9)5-6-14(3,4)13(12)15/h7,10-13,15H,5-6,8H2,1-4H3	FALSE	FALSE
13631	100.001.626	Xylitol	OC[C@H](O)[C@@H](O)[C@H](O)CO	InChI=1S/C5H12O5/c6-1-3(8)5(10)4(9)2-7/h3-10H,1-2H2/t3-,4+,5+	FALSE	TRUE		201-788-0	87-99-0	no	organic	mono-constituent substance	FULL	≥ 1000 to < 10000 tonnes	OCC(O)C(O)C(O)CO	InChI=1S/C5H12O5/c6-1-3(8)5(10)4(9)2-7/h3-10H,1-2H2	OC[C@H](O)[C@@H](O)[C@H](O)CO	OC[C@H](O)[C@@H](O)[C@H](O)CO	TRUE	DTXCID5022514	OC[C@H](O)[C@@H](O)[C@H](O)CO	TRUE	C([C@H](C([C@H](CO)O)O)O)O	FALSE	SciFinder has no stereochemistry	InChI=1S/C5H12O5/c6-1-3(8)5(10)4(9)2-7/h3-10H,1-2H2/t3-,4+,5+	InChI=1S/C5H12O5/c6-1-3(8)5(10)4(9)2-7/h3-10H,1-2H2/t3-,4+,5+	InChI=1S/C5H12O5/c6-1-3(8)5(10)4(9)2-7/h3-10H,1-2H2/t3-,4+,5?	TRUE	FALSE
10652	100.227.675	5H-Cyclopenta[h]quinazoline, 6,7,8,9-tetrahydro-7,7,8,9,9-pentamethyl-	CC1C(C)(C)C2=C(C3=C(CC2)C=NC=N3)C1(C)C	InChI=1S/C16H22N2/c1-10-15(2,3)12-7-6-11-8-17-9-18-14(11)13(12)16(10,4)5/h8-10H,6-7H2,1-5H3	TRUE			801-093-8	1315251-11-6	no	organic	mono-constituent substance	FULL	≥ 10 to < 100 tonnes	CC1C(C)(C)C2=C(C3=NC=NC=C3CC2)C1(C)C	InChI=1S/C16H22N2/c1-10-15(2,3)12-7-6-11-8-17-9-18-14(11)13(12)16(10,4)5/h8-10H,6-7H2,1-5H3	C[C@H]1C(C)(C)C2=C(C3=NC=NC=C3CC2)C1(C)C	C[C@H]1C(C)(C)C2=C(C3=NC=NC=C3CC2)C1(C)C	TRUE	DTXCID101028551	CC1C(C)(C)C2=C(C3=NC=NC=C3CC2)C1(C)C	FALSE	CC1C(C2=C(C1(C)C)C3=NC=NC=C3CC2)(C)C	OK	SciFinder has no stereochemistry	InChI=1S/C16H22N2/c1-10-15(2,3)12-7-6-11-8-17-9-18-14(11)13(12)16(10,4)5/h8-10H,6-7H2,1-5H3/t10-/m0/s1	InChI=1S/C16H22N2/c1-10-15(2,3)12-7-6-11-8-17-9-18-14(11)13(12)16(10,4)5/h8-10H,6-7H2,1-5H3	InChI=1S/C16H22N2/c1-10-15(2,3)12-7-6-11-8-17-9-18-14(11)13(12)16(10,4)5/h8-10H,6-7H2,1-5H3	FALSE	FALSE
4181	100.101.861	4-(5-ethoxyheptyl)perhydropentalen-2-one	CCOC(CC)CCCCC1CCC2CC(=O)CC12	InChI=1S/C17H30O2/c1-3-16(19-4-2)8-6-5-7-13-9-10-14-11-15(18)12-17(13)14/h13-14,16-17H,3-12H2,1-2H3	TRUE			419-880-6	99778-68-4	no	organic	mono-constituent substance	NONS	No longer valid	O=C1CC2CCC(CCCCC(OCC)CC)C2C1	InChI=1S/C17H30O2/c1-3-16(19-4-2)8-6-5-7-13-9-10-14-11-15(18)12-17(13)14/h13-14,16-17H,3-12H2,1-2H3	CCOC(CC)CCCC[C@H]1CCC2CC(=O)C[C@H]12	CCOC(CC)CCCC[C@H]1CCC2CC(=O)C[C@H]12	TRUE	DTXCID301477150	CCOC(CC)CCCCC1CCC2CC(=O)CC12	FALSE	CCC(CCCCC1CCC2C1CC(=O)C2)OCC	FALSE	SciFinder has no stereochemistry	InChI=1S/C17H30O2/c1-3-16(19-4-2)8-6-5-7-13-9-10-14-11-15(18)12-17(13)14/h13-14,16-17H,3-12H2,1-2H3/t13-,14?,16?,17+/m0/s1	InChI=1S/C17H30O2/c1-3-16(19-4-2)8-6-5-7-13-9-10-14-11-15(18)12-17(13)14/h13-14,16-17H,3-12H2,1-2H3	InChI=1S/C17H30O2/c1-3-16(19-4-2)8-6-5-7-13-9-10-14-11-15(18)12-17(13)14/h13-14,16-17H,3-12H2,1-2H3	FALSE	FALSE	O=C1CC2CCC(CCCCC(OCC)CC)C2C1
16022	100.103.017	1,2-Cyclohexanedicarboxylic acid, 1,2-diisononyl ester	CC(C)CCCCCCOC(=O)C1CCCCC1C(=O)OCCCCCCC(C)C	InChI=1S/C26H48O4/c1-21(2)15-9-5-7-13-19-29-25(27)23-17-11-12-18-24(23)26(28)30-20-14-8-6-10-16-22(3)4/h21-24H,5-20H2,1-4H3	TRUE			431-890-2	166412-78-8	no	organic	mono-constituent substance	FULL	≥ 10000 tonnes	CC(C)CCCCCCOC(=O)C1CCCCC1C(=O)OCCCCCCC(C)C	InChI=1S/C26H48O4/c1-21(2)15-9-5-7-13-19-29-25(27)23-17-11-12-18-24(23)26(28)30-20-14-8-6-10-16-22(3)4/h21-24H,5-20H2,1-4H3	CC(C)CCCCCCOC(=O)[C@H]1CCCC[C@H]1C(=O)OCCCCCCC(C)C	CC(C)CCCCCCOC(=O)[C@H]1CCCC[C@H]1C(=O)OCCCCCCC(C)C	TRUE				CC(C)CCCCCCOC(=O)C1CCCCC1C(=O)OCCCCCCC(C)C	FALSE	SciFinder has no stereochemistry	InChI=1S/C26H48O4/c1-21(2)15-9-5-7-13-19-29-25(27)23-17-11-12-18-24(23)26(28)30-20-14-8-6-10-16-22(3)4/h21-24H,5-20H2,1-4H3/t23-,24+		InChI=1S/C26H48O4/c1-21(2)15-9-5-7-13-19-29-25(27)23-17-11-12-18-24(23)26(28)30-20-14-8-6-10-16-22(3)4/h21-24H,5-20H2,1-4H3		FALSE
30699	100.103.910	2-Butanone, 1,3,4-trihydroxy-	OCC(O)C(=O)CO	InChI=1S/C4H8O4/c5-1-3(7)4(8)2-6/h3,5-7H,1-2H2	TRUE			443-800-9	40031-31-0	no	organic	mono-constituent substance	FULL	≥ 1 to < 10 tonnes	OCC(O)C(=O)CO	InChI=1S/C4H8O4/c5-1-3(7)4(8)2-6/h3,5-7H,1-2H2	OC[C@H](O)C(=O)CO	OC[C@H](O)C(=O)CO	TRUE	DTXCID60810945	OCC(O)C(=O)CO		C(C(C(=O)CO)O)O		SciFinder has no stereochemistry	InChI=1S/C4H8O4/c5-1-3(7)4(8)2-6/h3,5-7H,1-2H2/t3-/m0/s1	InChI=1S/C4H8O4/c5-1-3(7)4(8)2-6/h3,5-7H,1-2H2	InChI=1S/C4H8O4/c5-1-3(7)4(8)2-6/h3,5-7H,1-2H2	FALSE	TRUE
23812	100.043.880	4-methoxy-2-nitrobenzenediazonium	COC1=CC(=C(C=C1)[N+]#N)[N+]([O-])=O	InChI=1S/C7H6N3O3/c1-13-5-2-3-6(9-8)7(4-5)10(11)12/h2-4H,1H3/q+1	TRUE			248-284-7	27165-25-9	no	organic	mono-constituent substance	FULL	Cease manufacture	COC1=CC(=C(C=C1)[N+]#N)[N+]([O-])=O	InChI=1S/C7H6N3O3/c1-13-5-2-3-6(9-8)7(4-5)10(11)12/h2-4H,1H3/q+1	COC1=CC=C([N]#N)C(=C1)N(=O)=O	COC1=CC=C([N]#N)C(=C1)N(=O)=O	TRUE	DTXCID00812988	COC1=CC(=C(C=C1)[N+]#N)[N+]([O-])=O	FALSE	COC1=CC(=C(C=C1)[N+]#N)[N+](=O)[O-]	FALSE	unusual valence	InChI=1S/C7H6N3O3/c1-13-5-2-3-6(9-8)7(4-5)10(11)12/h2-4H,1H3	InChI=1S/C7H6N3O3/c1-13-5-2-3-6(9-8)7(4-5)10(11)12/h2-4H,1H3/q+1	InChI=1S/C7H6N3O3/c1-13-5-2-3-6(9-8)7(4-5)10(11)12/h2-4H,1H3/q+1	FALSE	FALSE
23047	100.044.205	2-methoxy-4-nitrobenzenediazonium	COC1=C(C=CC(=C1)[N+]([O-])=O)[N+]#N	InChI=1S/C7H6N3O3/c1-13-7-4-5(10(11)12)2-3-6(7)9-8/h2-4H,1H3/q+1	TRUE			248-642-2	27761-26-8	no	organic	mono-constituent substance	FULL	≥ 1 to < 10 tonnes	COC1=CC(=CC=C1[N+]#N)[N+]([O-])=O	InChI=1S/C7H6N3O3/c1-13-7-4-5(10(11)12)2-3-6(7)9-8/h2-4H,1H3/q+1	COC1=CC(=CC=C1[N]#N)N(=O)=O	COC1=CC(=CC=C1[N]#N)N(=O)=O	TRUE	DTXCID00819876	COC1=CC(=CC=C1[N+]#N)[N+]([O-])=O	FALSE	COC1=C(C=CC(=C1)[N+](=O)[O-])[N+]#N	FALSE	unusual valence	InChI=1S/C7H6N3O3/c1-13-7-4-5(10(11)12)2-3-6(7)9-8/h2-4H,1H3	InChI=1S/C7H6N3O3/c1-13-7-4-5(10(11)12)2-3-6(7)9-8/h2-4H,1H3/q+1	InChI=1S/C7H6N3O3/c1-13-7-4-5(10(11)12)2-3-6(7)9-8/h2-4H,1H3/q+1	FALSE	FALSE
3613	100.100.227	UM-214						400-230-5	54636-84-9	yes	organic	mono-constituent substance	NONS	Tonnage data confidential			CCCCCCCCCCCCCC(=O)NC1=CC(NC2=NN(C(=O)C2)C2=C(Cl)C=C(Cl)C=C2Cl)=C(Cl)C=C1			DTXCID1041768	CCCCCCCCCCCCCC(=O)NC1=CC=C(Cl)C(NC2=NN(C(=O)C2)C2=C(Cl)C=C(Cl)C=C2Cl)=C1	FALSE	CCCCCCCCCCCCCC(=O)NC1=CC(=C(C=C1)Cl)N=C2CC(=O)N(N2)C3=C(C=C(C=C3Cl)Cl)Cl	FALSE		InChI=1S/C29H36Cl4N4O2/c1-2-3-4-5-6-7-8-9-10-11-12-13-27(38)34-21-14-15-22(31)25(18-21)35-26-19-28(39)37(36-26)29-23(32)16-20(30)17-24(29)33/h14-18H,2-13,19H2,1H3,(H,34,38)(H,35,36)	InChI=1S/C29H36Cl4N4O2/c1-2-3-4-5-6-7-8-9-10-11-12-13-27(38)34-21-14-15-22(31)25(18-21)35-26-19-28(39)37(36-26)29-23(32)16-20(30)17-24(29)33/h14-18H,2-13,19H2,1H3,(H,34,38)(H,35,36)	InChI=1S/C29H36Cl4N4O2/c1-2-3-4-5-6-7-8-9-10-11-12-13-27(38)34-21-14-15-22(31)25(18-21)35-26-19-28(39)37(36-26)29-23(32)16-20(30)17-24(29)33/h14-18H,2-13,19H2,1H3,(H,34,38)(H,35,36)	TRUE	TRUE	O=C1N(N=C(NC2=CC(NC(CCCCCCCCCCCCC)=O)=CC=C2Cl)C1)C3=C(Cl)C=C(Cl)C=C3Cl	InChI=1S/C29H36Cl4N4O2/c1-2-3-4-5-6-7-8-9-10-11-12-13-27(38)34-21-14-15-22(31)25(18-21)35-26-19-28(39)37(36-26)29-23(32)16-20(30)17-24(29)33/h14-18H,2-13,19H2,1H3,(H,34,38)(H,35,36)	TRUE
3618	100.100.228	COUPLER I						400-250-4	95050-16-1	Omitted undefined stereo in OpenBabel	organic	mono-constituent substance	NONS	Cease manufacture			CCOC1N(CC2=CC=CC=C2)C(=O)N(C(C(=O)NC2=CC(NC(=O)C(CC)OC3=C(C=C(C=C3)C(C)(C)CC)C(C)(C)CC)=CC=C2Cl)C(=O)C(C)(C)C)C1=O			DTXCID001027900	CCOC1N(CC2=CC=CC=C2)C(=O)N(C(C(=O)NC2=CC(NC(=O)C(CC)OC3=C(C=C(C=C3)C(C)(C)CC)C(C)(C)CC)=CC=C2Cl)C(=O)C(C)(C)C)C1=O	TRUE	CCC(C(=O)NC1=CC(=C(C=C1)Cl)NC(=O)C(C(=O)C(C)(C)C)N2C(=O)C(N(C2=O)CC3=CC=CC=C3)OCC)OC4=C(C=C(C=C4)C(C)(C)CC)C(C)(C)CC	FALSE		InChI=1S/C45H59ClN4O7/c1-12-34(57-35-24-21-29(44(8,9)13-2)25-31(35)45(10,11)14-3)38(52)47-30-22-23-32(46)33(26-30)48-39(53)36(37(51)43(5,6)7)50-40(54)41(56-15-4)49(42(50)55)27-28-19-17-16-18-20-28/h16-26,34,36,41H,12-15,27H2,1-11H3,(H,47,52)(H,48,53)	InChI=1S/C45H59ClN4O7/c1-12-34(57-35-24-21-29(44(8,9)13-2)25-31(35)45(10,11)14-3)38(52)47-30-22-23-32(46)33(26-30)48-39(53)36(37(51)43(5,6)7)50-40(54)41(56-15-4)49(42(50)55)27-28-19-17-16-18-20-28/h16-26,34,36,41H,12-15,27H2,1-11H3,(H,47,52)(H,48,53)	InChI=1S/C45H59ClN4O7/c1-12-34(57-35-24-21-29(44(8,9)13-2)25-31(35)45(10,11)14-3)38(52)47-30-22-23-32(46)33(26-30)48-39(53)36(37(51)43(5,6)7)50-40(54)41(56-15-4)49(42(50)55)27-28-19-17-16-18-20-28/h16-26,34,36,41H,12-15,27H2,1-11H3,(H,47,52)(H,48,53)	TRUE	TRUE	C(C(NC1=CC(NC(C(OC2=C(C(CC)(C)C)C=C(C(CC)(C)C)C=C2)CC)=O)=CC=C1Cl)=O)(C(C(C)(C)C)=O)N3C(=O)N(CC4=CC=CC=C4)C(OCC)C3=O	InChI=1S/C45H59ClN4O7/c1-12-34(57-35-24-21-29(44(8,9)13-2)25-31(35)45(10,11)14-3)38(52)47-30-22-23-32(46)33(26-30)48-39(53)36(37(51)43(5,6)7)50-40(54)41(56-15-4)49(42(50)55)27-28-19-17-16-18-20-28/h16-26,34,36,41H,12-15,27H2,1-11H3,(H,47,52)(H,48,53)	TRUE
9915	100.100.231	AF-345						400-280-8	89929-65-7	yes	organic	mono-constituent substance	NONS	Tonnage data confidential			CCCOC1=CC2=C(C=C1OCCC)C1(CC(C)(C)C3=CC(OCCC)=C(OCCC)C=C13)CC2(C)C			DTXCID20299414	CCCOC1=C(OCCC)C=C2C(=C1)C(C)(C)CC21CC(C)(C)C2=CC(OCCC)=C(OCCC)C=C12	FALSE	CCCOC1=C(C=C2C(=C1)C(CC23CC(C4=CC(=C(C=C34)OCCC)OCCC)(C)C)(C)C)OCCC	FALSE		InChI=1S/C33H48O4/c1-9-13-34-27-17-23-25(19-29(27)36-15-11-3)33(21-31(23,5)6)22-32(7,8)24-18-28(35-14-10-2)30(20-26(24)33)37-16-12-4/h17-20H,9-16,21-22H2,1-8H3	InChI=1S/C33H48O4/c1-9-13-34-27-17-23-25(19-29(27)36-15-11-3)33(21-31(23,5)6)22-32(7,8)24-18-28(35-14-10-2)30(20-26(24)33)37-16-12-4/h17-20H,9-16,21-22H2,1-8H3	InChI=1S/C33H48O4/c1-9-13-34-27-17-23-25(19-29(27)36-15-11-3)33(21-31(23,5)6)22-32(7,8)24-18-28(35-14-10-2)30(20-26(24)33)37-16-12-4/h17-20H,9-16,21-22H2,1-8H3	TRUE	TRUE
3677	100.100.246	INTERSTAB FR 184						400-440-7		yes	organic	mono-constituent substance	NONS	No longer valid			CC(C)(C1=CC(Br)=C(OC(=O)CCC(Cl)(Cl)Cl)C(Br)=C1)C1=CC(Br)=C(OC(=O)CCC(Cl)(Cl)Cl)C(Br)=C1									InChI=1S/C23H18Br4Cl6O4/c1-21(2,11-7-13(24)19(14(25)8-11)36-17(34)3-5-22(28,29)30)12-9-15(26)20(16(27)10-12)37-18(35)4-6-23(31,32)33/h7-10H,3-6H2,1-2H3
8887	100.100.261	BLEU PERGASCRIPT BD 551						400-610-0	87563-89-1	Omitted undefined stereo in OpenBabel	organic	mono-constituent substance	NONS	Tonnage data confidential			CCCCCCCCN1C(C)=C(C2=C1C=CC=C2)C1(OC(=O)C2=CC=CN=C12)C1=C(OCC)C=C(C=C1)N(CC)CC			DTXCID40502533	CCCCCCCCN1C(C)=C(C2=CC=CC=C12)C1(OC(=O)C2=C1N=CC=C2)C1=C(OCC)C=C(C=C1)N(CC)CC	FALSE	CCCCCCCCN1C(=C(C2=CC=CC=C21)C3(C4=C(C=CC=N4)C(=O)O3)C5=C(C=C(C=C5)N(CC)CC)OCC)C	FALSE		InChI=1S/C36H45N3O3/c1-6-10-11-12-13-16-24-39-26(5)33(28-18-14-15-20-31(28)39)36(34-29(35(40)42-36)19-17-23-37-34)30-22-21-27(38(7-2)8-3)25-32(30)41-9-4/h14-15,17-23,25H,6-13,16,24H2,1-5H3	InChI=1S/C36H45N3O3/c1-6-10-11-12-13-16-24-39-26(5)33(28-18-14-15-20-31(28)39)36(34-29(35(40)42-36)19-17-23-37-34)30-22-21-27(38(7-2)8-3)25-32(30)41-9-4/h14-15,17-23,25H,6-13,16,24H2,1-5H3	InChI=1S/C36H45N3O3/c1-6-10-11-12-13-16-24-39-26(5)33(28-18-14-15-20-31(28)39)36(34-29(35(40)42-36)19-17-23-37-34)30-22-21-27(38(7-2)8-3)25-32(30)41-9-4/h14-15,17-23,25H,6-13,16,24H2,1-5H3	TRUE	TRUE
2244	100.100.262	PERGASCRIPT VIOLET BD 553						400-620-5	89923-59-1	yes	organic	mono-constituent substance	NONS	Tonnage data confidential			CCCCCCCCN1C(C)=C(C2=CC=CC=C12)C1(OC(=O)C2=CC=CN=C12)C1=C(C)N(CCCCCCCC)C2=C1C=CC=C2			DTXCID00547809	CCCCCCCCN1C(C)=C(C2=CC=CC=C12)C1(OC(=O)C2=C1N=CC=C2)C1=C(C)N(CCCCCCCC)C2=CC=CC=C12	FALSE	CCCCCCCCN1C(=C(C2=CC=CC=C21)C3(C4=C(C=CC=N4)C(=O)O3)C5=C(N(C6=CC=CC=C65)CCCCCCCC)C)C	FALSE		InChI=1S/C41H51N3O2/c1-5-7-9-11-13-19-28-43-30(3)37(32-22-15-17-25-35(32)43)41(39-34(40(45)46-41)24-21-27-42-39)38-31(4)44(29-20-14-12-10-8-6-2)36-26-18-16-23-33(36)38/h15-18,21-27H,5-14,19-20,28-29H2,1-4H3	InChI=1S/C41H51N3O2/c1-5-7-9-11-13-19-28-43-30(3)37(32-22-15-17-25-35(32)43)41(39-34(40(45)46-41)24-21-27-42-39)38-31(4)44(29-20-14-12-10-8-6-2)36-26-18-16-23-33(36)38/h15-18,21-27H,5-14,19-20,28-29H2,1-4H3	InChI=1S/C41H51N3O2/c1-5-7-9-11-13-19-28-43-30(3)37(32-22-15-17-25-35(32)43)41(39-34(40(45)46-41)24-21-27-42-39)38-31(4)44(29-20-14-12-10-8-6-2)36-26-18-16-23-33(36)38/h15-18,21-27H,5-14,19-20,28-29H2,1-4H3	TRUE	TRUE
2288	100.100.275	UC-130						400-770-1	93951-12-3	Omitted undefined stereo in OpenBabel	organic	mono-constituent substance	NONS	Cease manufacture			CCC(OC1=C(C=C(C=C1)C(C)(C)CC)C(C)(C)CC)C(=O)NC1=C(O)C(Cl)=C(CC)C(Cl)=C1			DTXCID30817183	CCC(OC1=C(C=C(C=C1)C(C)(C)CC)C(C)(C)CC)C(=O)NC1=CC(Cl)=C(CC)C(Cl)=C1O	FALSE	CCC1=C(C=C(C(=C1Cl)O)NC(=O)C(CC)OC2=C(C=C(C=C2)C(C)(C)CC)C(C)(C)CC)Cl	FALSE		InChI=1S/C28H39Cl2NO3/c1-9-18-20(29)16-21(25(32)24(18)30)31-26(33)22(10-2)34-23-14-13-17(27(5,6)11-3)15-19(23)28(7,8)12-4/h13-16,22,32H,9-12H2,1-8H3,(H,31,33)	InChI=1S/C28H39Cl2NO3/c1-9-18-20(29)16-21(25(32)24(18)30)31-26(33)22(10-2)34-23-14-13-17(27(5,6)11-3)15-19(23)28(7,8)12-4/h13-16,22,32H,9-12H2,1-8H3,(H,31,33)	InChI=1S/C28H39Cl2NO3/c1-9-18-20(29)16-21(25(32)24(18)30)31-26(33)22(10-2)34-23-14-13-17(27(5,6)11-3)15-19(23)28(7,8)12-4/h13-16,22,32H,9-12H2,1-8H3,(H,31,33)	TRUE	TRUE	C(CC)(C)(C)C1=C(OC(C(NC2=C(O)C(Cl)=C(CC)C(Cl)=C2)=O)CC)C=CC(C(CC)(C)C)=C1	InChI=1S/C28H39Cl2NO3/c1-9-18-20(29)16-21(25(32)24(18)30)31-26(33)22(10-2)34-23-14-13-17(27(5,6)11-3)15-19(23)28(7,8)12-4/h13-16,22,32H,9-12H2,1-8H3,(H,31,33)	TRUE
2349	100.100.298	RI 9410						401-020-6		Omitted undefined stereo in OpenBabel	organic	mono-constituent substance	NONS	Tonnage data confidential			CCCCCCCCCCCCCCCCCC(=O)OCC(COC(=O)CCCCCCCC(O)CCC(O)CCCCCCCC)OC(=O)CCCCCCCCC(O)CCCCCCCC									InChI=1S/C59H114O9/c1-4-7-10-13-16-17-18-19-20-21-22-23-24-32-39-46-57(63)66-51-56(68-59(65)48-41-33-26-25-30-36-43-53(60)42-35-28-14-11-8-5-2)52-67-58(64)47-40-34-27-31-38-45-55(62)50-49-54(61)44-37-29-15-12-9-6-3/h53-56,60-62H,4-52H2,1-3H3
9324	100.100.329	CF-51						401-350-0	102232-11-1	Omitted undefined stereo in OpenBabel	organic	mono-constituent substance	NONS	Tonnage data confidential			CCN(CC1CCCO1)C1=CC2=C(C=C1)C1(OC(=O)C3=C1C=CC=C3)C1=C(O2)C=C(C)C(NC2=CC=CC=C2)=C1			DTXCID401028079	CCN(CC1CCCO1)C1=CC2=C(C=C1)C1(OC(=O)C3=C1C=CC=C3)C1=C(O2)C=C(C)C(NC2=CC=CC=C2)=C1	TRUE	CCN(CC1CCCO1)C2=CC3=C(C=C2)C4(C5=CC=CC=C5C(=O)O4)C6=C(O3)C=C(C(=C6)NC7=CC=CC=C7)C	FALSE		InChI=1S/C34H32N2O4/c1-3-36(21-25-12-9-17-38-25)24-15-16-28-32(19-24)39-31-18-22(2)30(35-23-10-5-4-6-11-23)20-29(31)34(28)27-14-8-7-13-26(27)33(37)40-34/h4-8,10-11,13-16,18-20,25,35H,3,9,12,17,21H2,1-2H3	InChI=1S/C34H32N2O4/c1-3-36(21-25-12-9-17-38-25)24-15-16-28-32(19-24)39-31-18-22(2)30(35-23-10-5-4-6-11-23)20-29(31)34(28)27-14-8-7-13-26(27)33(37)40-34/h4-8,10-11,13-16,18-20,25,35H,3,9,12,17,21H2,1-2H3	InChI=1S/C34H32N2O4/c1-3-36(21-25-12-9-17-38-25)24-15-16-28-32(19-24)39-31-18-22(2)30(35-23-10-5-4-6-11-23)20-29(31)34(28)27-14-8-7-13-26(27)33(37)40-34/h4-8,10-11,13-16,18-20,25,35H,3,9,12,17,21H2,1-2H3	TRUE	TRUE	O=C1OC2(C=3C(OC=4C2=CC=C(N(CC5CCCO5)CC)C4)=CC(C)=C(NC6=CC=CC=C6)C3)C=7C1=CC=CC7	InChI=1S/C34H32N2O4/c1-3-36(21-25-12-9-17-38-25)24-15-16-28-32(19-24)39-31-18-22(2)30(35-23-10-5-4-6-11-23)20-29(31)34(28)27-14-8-7-13-26(27)33(37)40-34/h4-8,10-11,13-16,18-20,25,35H,3,9,12,17,21H2,1-2H3	TRUE
2953	100.100.350	KE 1951						401-590-6	69275-01-0	Omitted undefined stereo in OpenBabel	organic	mono-constituent substance	NONS	Tonnage data confidential			CCCCCCCCCCC(CCCCCCCC)COC(=O)CCCCCCCCC(=O)OCC(CCCCCCCC)CCCCCCCCCC			DTXCID001506586	CCCCCCCCCCC(CCCCCCCC)COC(=O)CCCCCCCCC(=O)OCC(CCCCCCCC)CCCCCCCCCC	TRUE	CCCCCCCCCCC(CCCCCCCC)COC(=O)CCCCCCCCC(=O)OCC(CCCCCCCC)CCCCCCCCCC	TRUE		InChI=1S/C50H98O4/c1-5-9-13-17-21-23-29-35-41-47(39-33-27-19-15-11-7-3)45-53-49(51)43-37-31-25-26-32-38-44-50(52)54-46-48(40-34-28-20-16-12-8-4)42-36-30-24-22-18-14-10-6-2/h47-48H,5-46H2,1-4H3	InChI=1S/C50H98O4/c1-5-9-13-17-21-23-29-35-41-47(39-33-27-19-15-11-7-3)45-53-49(51)43-37-31-25-26-32-38-44-50(52)54-46-48(40-34-28-20-16-12-8-4)42-36-30-24-22-18-14-10-6-2/h47-48H,5-46H2,1-4H3	InChI=1S/C50H98O4/c1-5-9-13-17-21-23-29-35-41-47(39-33-27-19-15-11-7-3)45-53-49(51)43-37-31-25-26-32-38-44-50(52)54-46-48(40-34-28-20-16-12-8-4)42-36-30-24-22-18-14-10-6-2/h47-48H,5-46H2,1-4H3	TRUE	TRUE	C(COC(CCCCCCCCC(OCC(CCCCCCCCCC)CCCCCCCC)=O)=O)(CCCCCCCCCC)CCCCCCCC	InChI=1S/C50H98O4/c1-5-9-13-17-21-23-29-35-41-47(39-33-27-19-15-11-7-3)45-53-49(51)43-37-31-25-26-32-38-44-50(52)54-46-48(40-34-28-20-16-12-8-4)42-36-30-24-22-18-14-10-6-2/h47-48H,5-46H2,1-4H3	TRUE
4422	100.100.385	N-hexadecyl(or octadecyl)-N-hexadecyl(or octadecyl)benzamide						401-980-6		yes	organic	mono-constituent substance	NONS	Tonnage data confidential			CCCCCCCCCCCCCCCCCCN(CCCCCCCCCCCCCCCCCC)C(=O)C1=CC=CC=C1						CCCCCCCCCCCCCCCCCCN(CCCCCCCCCCCCCCCCCC)C(=O)C1=CC=CC=C1	TRUE		InChI=1S/C43H79NO/c1-3-5-7-9-11-13-15-17-19-21-23-25-27-29-31-36-40-44(43(45)42-38-34-33-35-39-42)41-37-32-30-28-26-24-22-20-18-16-14-12-10-8-6-4-2/h33-35,38-39H,3-32,36-37,40-41H2,1-2H3
9769	100.100.417	C-1658						402-350-3		Omitted undefined stereo in OpenBabel	organic	mono-constituent substance	NONS	No longer valid			CCCCCCCCCCCCCCCCOS(=O)NC1=CC=C(Cl)C(NC(=O)C(OC2=C(CN(CC)C(=O)SC3=NN=NN3CC(=O)OCCC)C=C(C=C2)N(=O)=O)C(=O)C(C)(C)C)=C1									InChI=1S/C45H67ClN8O10S2/c1-7-10-11-12-13-14-15-16-17-18-19-20-21-22-28-63-66(61)49-34-23-25-36(46)37(30-34)47-42(57)40(41(56)45(4,5)6)64-38-26-24-35(54(59)60)29-33(38)31-52(9-3)44(58)65-43-48-50-51-53(43)32-39(55)62-27-8-2/h23-26,29-30,40,49H,7-22,27-28,31-32H2,1-6H3,(H,47,57)
9778	100.100.420	BIS-STYRYL BRIGHTENER 4409						402-380-7		missing cis/trans infomation	organic	mono-constituent substance	NONS	Tonnage data confidential			CC[N+](CC)(CCOC1=CC=CC=C1C=CC1=CC=C(C=CC2=C(OCC[N+](CC)(CC)CC([O-])=O)C=CC=C2)C=C1)CC([O-])=O									InChI=1S/C38H48N2O6/c1-5-39(6-2,29-37(41)42)25-27-45-35-15-11-9-13-33(35)23-21-31-17-19-32(20-18-31)22-24-34-14-10-12-16-36(34)46-28-26-40(7-3,8-4)30-38(43)44/h9-24H,5-8,25-30H2,1-4H3
4967	100.100.444	MG1						402-630-5		yes	organic	mono-constituent substance	NONS	No longer valid			CN(C)C1=CC=C(C=C1)C(=CC1(OC(=O)C2=C(Cl)C(Cl)=C(Cl)C(Cl)=C12)C=C(C1=CC=C(C=C1)N(C)C)C1=CC=C(C=C1)N(C)C)C1=CC=C(C=C1)N(C)C						CN(C)C1=CC=C(C=C1)C(=CC2(C3=C(C(=C(C(=C3Cl)Cl)Cl)Cl)C(=O)O2)C=C(C4=CC=C(C=C4)N(C)C)C5=CC=C(C=C5)N(C)C)C6=CC=C(C=C6)N(C)C	FALSE		InChI=1S/C44H42Cl4N4O2/c1-49(2)31-17-9-27(10-18-31)35(28-11-19-32(20-12-28)50(3)4)25-44(38-37(43(53)54-44)39(45)41(47)42(48)40(38)46)26-36(29-13-21-33(22-14-29)51(5)6)30-15-23-34(24-16-30)52(7)8/h9-26H,1-8H3		InChI=1S/C44H42Cl4N4O2/c1-49(2)31-17-9-27(10-18-31)35(28-11-19-32(20-12-28)50(3)4)25-44(38-37(43(53)54-44)39(45)41(47)42(48)40(38)46)26-36(29-13-21-33(22-14-29)51(5)6)30-15-23-34(24-16-30)52(7)8/h9-26H,1-8H3		TRUE
5011	100.100.454	BK 2256						402-750-8		missing cis/trans infomation	organic	mono-constituent substance	NONS	Tonnage data confidential			CCCCCCCCCCCCCCCCCC(=O)OCC(CCCCCCC=CCCCCCCC)CCCCCCC=CCCCCCCCCC									InChI=1S/C52H100O2/c1-4-7-10-13-16-19-22-25-27-30-33-36-39-42-45-48-51(47-44-41-38-35-32-29-24-21-18-15-12-9-6-3)50-54-52(53)49-46-43-40-37-34-31-28-26-23-20-17-14-11-8-5-2/h24,27,29-30,51H,4-23,25-26,28,31-50H2,1-3H3
4990	100.100.455	241 AJG						402-760-2		Omitted undefined stereo in OpenBabel	organic	mono-constituent substance	NONS	Tonnage data confidential			CCCCCCCCCCCCCC(=O)NC1=CC=C(Cl)C(NC2=NN(C(=O)C2SC2=CC=CC=C2NC(=O)C(C)(C)C)C2=C(Cl)C=C(Cl)C=C2Cl)=C1						CCCCCCCCCCCCCC(=O)NC1=CC(=C(C=C1)Cl)NC2=NN(C(=O)C2SC3=CC=CC=C3NC(=O)C(C)(C)C)C4=C(C=C(C=C4Cl)Cl)Cl	FALSE		InChI=1S/C40H49Cl4N5O3S/c1-5-6-7-8-9-10-11-12-13-14-15-20-34(50)45-27-21-22-28(42)32(25-27)46-37-36(38(51)49(48-37)35-29(43)23-26(41)24-30(35)44)53-33-19-17-16-18-31(33)47-39(52)40(2,3)4/h16-19,21-25,36H,5-15,20H2,1-4H3,(H,45,50)(H,46,48)(H,47,52)		InChI=1S/C40H49Cl4N5O3S/c1-5-6-7-8-9-10-11-12-13-14-15-20-34(50)45-27-21-22-28(42)32(25-27)46-37-36(38(51)49(48-37)35-29(43)23-26(41)24-30(35)44)53-33-19-17-16-18-31(33)47-39(52)40(2,3)4/h16-19,21-25,36H,5-15,20H2,1-4H3,(H,45,50)(H,46,48)(H,47,52)		TRUE
5109	100.100.488	ENS 123/NT-4						403-120-5		Omitted undefined stereo in OpenBabel	organic	mono-constituent substance	NONS	Tonnage data confidential			CCCCCCCCCCCCCCCCS(=O)(=O)NC1=CC=CC2=C1NC=C2C1(OC(=O)C2=CC=CC3=C2C1=CC=C3)C1=CNC2=C1C=CC(=C2)S(=O)(=O)N(C)C						CCCCCCCCCCCCCCCCS(=O)(=O)NC1=CC=CC2=C1NC=C2C3(C4=CC=CC5=C4C(=CC=C5)C(=O)O3)C6=CNC7=C6C=CC(=C7)S(=O)(=O)N(C)C	FALSE		InChI=1S/C46H56N4O6S2/c1-4-5-6-7-8-9-10-11-12-13-14-15-16-17-29-57(52,53)49-41-26-20-23-36-40(32-48-44(36)41)46(38-25-19-22-33-21-18-24-37(43(33)38)45(51)56-46)39-31-47-42-30-34(27-28-35(39)42)58(54,55)50(2)3/h18-28,30-32,47-49H,4-17,29H2,1-3H3		InChI=1S/C46H56N4O6S2/c1-4-5-6-7-8-9-10-11-12-13-14-15-16-17-29-57(52,53)49-41-26-20-23-36-40(32-48-44(36)41)46(38-25-19-22-33-21-18-24-37(43(33)38)45(51)56-46)39-31-47-42-30-34(27-28-35(39)42)58(54,55)50(2)3/h18-28,30-32,47-49H,4-17,29H2,1-3H3		TRUE
13066	100.100.492	BRUN CROMOPHTAL RBN						403-170-8		missing cis/trans infomation	organic	mono-constituent substance	NONS	Tonnage data confidential			CC(C)OC(=O)C1=CC(N=NC2=C3C=CC=CC3=CC(C(=O)NC3=C(C)C=C(C(C)=C3)C3=CC=C4C(=C3)C=C(C(N)=O)C(O)=C4N=NC3=CC(=CC=C3C(=O)OC(C)C)C(=O)OC(C)C)=C2O)=C(C=C1)C(=O)OC(C)C									InChI=1S/C58H56N6O12/c1-28(2)73-55(69)36-16-19-41(57(71)75-30(5)6)47(26-36)61-63-49-39-14-12-11-13-34(39)24-45(52(49)66)54(68)60-46-22-32(9)43(21-33(46)10)35-15-18-40-38(23-35)25-44(53(59)67)51(65)50(40)64-62-48-27-37(56(70)74-29(3)4)17-20-42(48)58(72)76-31(7)8/h11-31,65-66H,1-10H3,(H2,59,67)(H,60,68)
5125	100.100.493	AA70						403-180-2		yes	organic	mono-constituent substance	NONS	Tonnage data confidential			COCCOCCOCCOCCC[Si](OCCOCCOCCOC)(OCCOCCOCCOC)OCCOCCOCCOC						COCCOCCOCCOCCC[Si](OCCOCCOCCOC)(OCCOCCOCCOC)OCCOCCOCCOC	TRUE		InChI=1S/C31H66O16Si/c1-32-7-11-37-17-21-41-16-15-36-6-5-31-48(45-28-25-42-22-18-38-12-8-33-2,46-29-26-43-23-19-39-13-9-34-3)47-30-27-44-24-20-40-14-10-35-4/h5-31H2,1-4H3		InChI=1S/C31H66O16Si/c1-32-7-11-37-17-21-41-16-15-36-6-5-31-48(45-28-25-42-22-18-38-12-8-33-2,46-29-26-43-23-19-39-13-9-34-3)47-30-27-44-24-20-40-14-10-35-4/h5-31H2,1-4H3		TRUE
14091	100.100.494	C.I. DISPERSE YELLOW 244						403-190-7		missing cis/trans infomation	organic	mono-constituent substance	NONS	Tonnage data confidential			CCCCC(CC)COC(=O)C1=CC=C(N=NC2=C(O)N(C)C(=O)C(C#N)=C2C)C(=C1)N(=O)=O									InChI=1S/C23H27N5O6/c1-5-7-8-15(6-2)13-34-23(31)16-9-10-18(19(11-16)28(32)33)25-26-20-14(3)17(12-24)21(29)27(4)22(20)30/h9-11,15,30H,5-8,13H2,1-4H3
4187	100.100.531	PK-N 302						403-600-4		Omitted undefined stereo in OpenBabel	organic	mono-constituent substance	NONS	Tonnage data confidential			CC1=CC=C(C=C1)C(=O)CC(NC(C)(C)CO)C(O)=O									InChI=1S/C15H21NO4/c1-10-4-6-11(7-5-10)13(18)8-12(14(19)20)16-15(2,3)9-17/h4-7,12,16-17H,8-9H2,1-3H3,(H,19,20)
8369	100.100.554	CM-512						403-850-4	92991-05-4	missing cis/trans infomation	organic	mono-constituent substance	NONS	Tonnage data confidential			CCC(OC1=CC=C(C=C1C(C)(C)CC)C(C)(C)CC)C(=O)NC1=CC=CC(=C1)C(=O)NC1=NN(C(=O)C1N=NC1=CC=C(OC)C=C1)C1=C(Cl)C=C(Cl)C=C1Cl			DTXCID40499156	CCC(OC1=C(C=C(C=C1)C(C)(C)CC)C(C)(C)CC)C(=O)NC1=CC=CC(=C1)C(=O)NC1=NN(C(=O)C1\N=N\C1=CC=C(OC)C=C1)C1=C(Cl)C=C(Cl)C=C1Cl	FALSE	CCC(C(=O)NC1=CC=CC(=C1)C(=O)NC2=NN(C(=O)C2N=NC3=CC=C(C=C3)OC)C4=C(C=C(C=C4Cl)Cl)Cl)OC5=C(C=C(C=C5)C(C)(C)CC)C(C)(C)CC	FALSE		InChI=1S/C43H47Cl3N6O5/c1-9-34(57-35-20-15-26(42(4,5)10-2)22-31(35)43(6,7)11-3)40(54)47-29-14-12-13-25(21-29)39(53)48-38-36(50-49-28-16-18-30(56-8)19-17-28)41(55)52(51-38)37-32(45)23-27(44)24-33(37)46/h12-24,34,36H,9-11H2,1-8H3,(H,47,54)(H,48,51,53)	InChI=1S/C43H47Cl3N6O5/c1-9-34(57-35-20-15-26(42(4,5)10-2)22-31(35)43(6,7)11-3)40(54)47-29-14-12-13-25(21-29)39(53)48-38-36(50-49-28-16-18-30(56-8)19-17-28)41(55)52(51-38)37-32(45)23-27(44)24-33(37)46/h12-24,34,36H,9-11H2,1-8H3,(H,47,54)(H,48,51,53)/b50-49+	InChI=1S/C43H47Cl3N6O5/c1-9-34(57-35-20-15-26(42(4,5)10-2)22-31(35)43(6,7)11-3)40(54)47-29-14-12-13-25(21-29)39(53)48-38-36(50-49-28-16-18-30(56-8)19-17-28)41(55)52(51-38)37-32(45)23-27(44)24-33(37)46/h12-24,34,36H,9-11H2,1-8H3,(H,47,54)(H,48,51,53)	FALSE	TRUE
14006	100.100.569	ALKYLSILAN TA 01946						404-020-4	17980-32-4	yes	organic	mono-constituent substance	NONS	Tonnage data confidential			CO[Si](CC(C)C)(CC(C)C)OC			DTXCID3035711	CO[Si](CC(C)C)(CC(C)C)OC	TRUE	CC(C)C[Si](CC(C)C)(OC)OC	FALSE		InChI=1S/C10H24O2Si/c1-9(2)7-13(11-5,12-6)8-10(3)4/h9-10H,7-8H2,1-6H3	InChI=1S/C10H24O2Si/c1-9(2)7-13(11-5,12-6)8-10(3)4/h9-10H,7-8H2,1-6H3	InChI=1S/C10H24O2Si/c1-9(2)7-13(11-5,12-6)8-10(3)4/h9-10H,7-8H2,1-6H3	TRUE	TRUE	[Si](CC(C)C)(CC(C)C)(OC)OC	InChI=1S/C10H24O2Si/c1-9(2)7-13(11-5,12-6)8-10(3)4/h9-10H,7-8H2,1-6H3	TRUE
9323	100.100.571	DOW CORNING X2-7551						404-040-3		Omitted undefined stereo in OpenBabel	organic	mono-constituent substance	NONS	Tonnage data confidential			CC\C=C\CC[Si](C)(C)O[Si](C)(CCC\C=C\C)O[Si](C)(C)O[Si](C)(C)CCCCC=C									InChI=1S/C25H54O3Si4/c1-11-14-17-20-23-29(4,5)26-31(8,9)28-32(10,25-22-19-16-13-3)27-30(6,7)24-21-18-15-12-2/h11,13,15-16,18H,1,12,14,17,19-25H2,2-10H3/b16-13+,18-15+
9391	100.100.598	VERMILION DCF						404-340-4		Omitted undefined stereo in OpenBabel	organic	mono-constituent substance	NONS	Tonnage data confidential			CCCCN(CCCC)C1=CC2=C(C=C1)C1(OC(=O)C3=C1C=CC=C3)C1=C(O2)C=C(C)C(Br)=C1						CCCCN(CCCC)C1=CC2=C(C=C1)C3(C4=CC=CC=C4C(=O)O3)C5=C(O2)C=C(C(=C5)Br)C	FALSE		InChI=1S/C29H30BrNO3/c1-4-6-14-31(15-7-5-2)20-12-13-23-27(17-20)33-26-16-19(3)25(30)18-24(26)29(23)22-11-9-8-10-21(22)28(32)34-29/h8-13,16-18H,4-7,14-15H2,1-3H3		InChI=1S/C29H30BrNO3/c1-4-6-14-31(15-7-5-2)20-12-13-23-27(17-20)33-26-16-19(3)25(30)18-24(26)29(23)22-11-9-8-10-21(22)28(32)34-29/h8-13,16-18H,4-7,14-15H2,1-3H3		TRUE
9393	100.100.599	AF-348						404-350-9	28889-54-5	Omitted undefined stereo in OpenBabel	organic	mono-constituent substance	NONS	Cease manufacture			CN1C2NC(=O)NC2NC1=O			DTXCID50347715	CN1C2NC(=O)NC2NC1=O	TRUE	CN1C2C(NC(=O)N2)NC1=O	FALSE		InChI=1S/C5H8N4O2/c1-9-3-2(7-5(9)11)6-4(10)8-3/h2-3H,1H3,(H,7,11)(H2,6,8,10)	InChI=1S/C5H8N4O2/c1-9-3-2(7-5(9)11)6-4(10)8-3/h2-3H,1H3,(H,7,11)(H2,6,8,10)	InChI=1S/C5H8N4O2/c1-9-3-2(7-5(9)11)6-4(10)8-3/h2-3H,1H3,(H,7,11)(H2,6,8,10)	TRUE	TRUE
9688	100.100.624	FC-45						404-620-6	98835-90-6	missing cis/trans infomation	organic	mono-constituent substance	NONS	Cease manufacture			CCCCCCCCOC(=O)C(=CC=CN(CC)CC)S(=O)(=O)C1=CC=CC=C1						CCCCCCCCOC(=O)C(=CC=CN(CC)CC)S(=O)(=O)C1=CC=CC=C1	TRUE		InChI=1S/C23H35NO4S/c1-4-7-8-9-10-14-20-28-23(25)22(18-15-19-24(5-2)6-3)29(26,27)21-16-12-11-13-17-21/h11-13,15-19H,4-10,14,20H2,1-3H3		InChI=1S/C23H35NO4S/c1-4-7-8-9-10-14-20-28-23(25)22(18-15-19-24(5-2)6-3)29(26,27)21-16-12-11-13-17-21/h11-13,15-19H,4-10,14,20H2,1-3H3		TRUE
3464	100.100.656	HOSTINERT 175						404-960-5		Omitted undefined stereo in OpenBabel	organic	mono-constituent substance	NONS	Cease manufacture			FC(F)(F)C(F)(F)C(F)(F)OC(F)(C(F)(F)F)C(F)(F)OC(F)(C(F)(F)F)C(F)(OC(F)(F)C(F)(F)C(F)(F)F)C(F)(F)F						C(C(C(F)(F)F)(OC(C(C(F)(F)F)(F)F)(F)F)F)(C(F)(F)F)(OC(C(C(F)(F)F)(OC(C(C(F)(F)F)(F)F)(F)F)F)(F)F)F	FALSE		InChI=1S/C13F28O3/c14-1(15,6(21,22)23)11(36,37)42-3(18,8(27,28)29)4(19,9(30,31)32)43-13(40,41)5(20,10(33,34)35)44-12(38,39)2(16,17)7(24,25)26		InChI=1S/C13F28O3/c14-1(15,6(21,22)23)11(36,37)42-3(18,8(27,28)29)4(19,9(30,31)32)43-13(40,41)5(20,10(33,34)35)44-12(38,39)2(16,17)7(24,25)26		TRUE
3475	100.100.661	Isopropylated, tert-butylated triphenylphosphate						405-010-2		Omitted undefined stereo in OpenBabel	organic	mono-constituent substance	NONS	Tonnage data confidential			CC(C)C1=CC(C(C)C)=C(OP(=O)(OC2=CC=CC=C2)OC2=CC(=CC(=C2)C(C)(C)C)C(C)(C)C)C=C1									InChI=1S/C32H43O4P/c1-22(2)24-16-17-30(29(18-24)23(3)4)36-37(33,34-27-14-12-11-13-15-27)35-28-20-25(31(5,6)7)19-26(21-28)32(8,9)10/h11-23H,1-10H3
3516	100.100.677	TTP CYAN 1						405-180-8	83743-04-8	missing cis/trans infomation	organic	mono-constituent substance	NONS	Tonnage data confidential			CCN(CC)C1=CC(NC(C)=O)=C(C=C1)N=NC1=C(C=C(S1)N=NC1=CC=CC=C1)C#N						CCN(CC)C1=CC(=C(C=C1)N=NC2=C(C=C(S2)N=NC3=CC=CC=C3)C#N)NC(=O)C	FALSE		InChI=1S/C23H23N7OS/c1-4-30(5-2)19-11-12-20(21(14-19)25-16(3)31)27-29-23-17(15-24)13-22(32-23)28-26-18-9-7-6-8-10-18/h6-14H,4-5H2,1-3H3,(H,25,31)		InChI=1S/C23H23N7OS/c1-4-30(5-2)19-11-12-20(21(14-19)25-16(3)31)27-29-23-17(15-24)13-22(32-23)28-26-18-9-7-6-8-10-18/h6-14H,4-5H2,1-3H3,(H,25,31)		TRUE	N(=NC1=C(NC(C)=O)C=C(N(CC)CC)C=C1)C2=C(C#N)C=C(N=NC3=CC=CC=C3)S2	InChI=1S/C23H23N7OS/c1-4-30(5-2)19-11-12-20(21(14-19)25-16(3)31)27-29-23-17(15-24)13-22(32-23)28-26-18-9-7-6-8-10-18/h6-14H,4-5H2,1-3H3,(H,25,31)	TRUE
3528	100.100.680	V 157345						405-220-4		Omitted undefined stereo in OpenBabel	organic	mono-constituent substance	NONS	Cease manufacture			CCCCCCCCCCCCCC(=O)OC(C)COC						CCCCCCCCCCCCCC(=O)OC(C)COC	TRUE		InChI=1S/C18H36O3/c1-4-5-6-7-8-9-10-11-12-13-14-15-18(19)21-17(2)16-20-3/h17H,4-16H2,1-3H3		InChI=1S/C18H36O3/c1-4-5-6-7-8-9-10-11-12-13-14-15-18(19)21-17(2)16-20-3/h17H,4-16H2,1-3H3		TRUE
3558	100.100.690	BIOFINE TM (R)-IPG						405-320-8	14347-78-5	yes	organic	mono-constituent substance	NONS	No longer valid			[H][C@@]1(CO)COC(C)(C)O1						CC1(OC[C@H](O1)CO)C	FALSE		InChI=1S/C6H12O3/c1-6(2)8-4-5(3-7)9-6/h5,7H,3-4H2,1-2H3/t5-/m1/s1		InChI=1S/C6H12O3/c1-6(2)8-4-5(3-7)9-6/h5,7H,3-4H2,1-2H3/t5-/m1/s1		TRUE	C(O)[C@H]1OC(C)(C)OC1	InChI=1S/C6H12O3/c1-6(2)8-4-5(3-7)9-6/h5,7H,3-4H2,1-2H3/t5-/m1/s1	TRUE
2634	100.100.711	DISPERSIONSGELB 2910						405-550-9		missing cis/trans infomation	organic	mono-constituent substance	NONS	Tonnage data confidential			CN1C(O)=C(N=NC2=CC(=CC=C2)C(=O)OCCOC2=CC=CC=C2)C(C)=C(C#N)C1=O									InChI=1S/C23H20N4O5/c1-15-19(14-24)21(28)27(2)22(29)20(15)26-25-17-8-6-7-16(13-17)23(30)32-12-11-31-18-9-4-3-5-10-18/h3-10,13,29H,11-12H2,1-2H3
2698	100.100.737	NAMA						405-810-1	104788-62-7	yes	organic	mono-constituent substance	NONS	Tonnage data confidential			CCCCCCCCCNC(=O)CCCCC(=O)OC			DTXCID2032893	CCCCCCCCCNC(=O)CCCCC(=O)OC	TRUE	CCCCCCCCCNC(=O)CCCCC(=O)OC	TRUE		InChI=1S/C16H31NO3/c1-3-4-5-6-7-8-11-14-17-15(18)12-9-10-13-16(19)20-2/h3-14H2,1-2H3,(H,17,18)	InChI=1S/C16H31NO3/c1-3-4-5-6-7-8-11-14-17-15(18)12-9-10-13-16(19)20-2/h3-14H2,1-2H3,(H,17,18)	InChI=1S/C16H31NO3/c1-3-4-5-6-7-8-11-14-17-15(18)12-9-10-13-16(19)20-2/h3-14H2,1-2H3,(H,17,18)	TRUE	TRUE
2694	100.100.745	NT-7						405-910-5		Omitted undefined stereo in OpenBabel	organic	mono-constituent substance	NONS	Tonnage data confidential			CCCCCCCCCCCCCCCCCCCCCCOC1=CC2=C(C=C(C(=O)OC)C(O)=C2C=C1)C1(OC(=O)C2=CC=CC3=CC=CC1=C23)C1=CC(C)=C(O)C2=C1C=CC1=C2C=CC=C1									InChI=1S/C61H70O7/c1-4-5-6-7-8-9-10-11-12-13-14-15-16-17-18-19-20-21-22-25-38-67-45-35-37-47-50(40-45)54(41-51(58(47)63)59(64)66-3)61(52-33-27-30-44-29-26-32-49(55(44)52)60(65)68-61)53-39-42(2)57(62)56-46-31-24-23-28-43(46)34-36-48(53)56/h23-24,26-37,39-41,62-63H,4-22,25,38H2,1-3H3
2713	100.100.755	AF-363						406-019-4	110011-21-7	Omitted undefined stereo in OpenBabel	organic	mono-constituent substance	NONS	Cease manufacture			CCCCCCCCC(CCCCCC)C(=O)NC1=CC(=CC(NC(=O)C(CCCCCC)CCCCCCCC)=C1)C(=O)NC1=CC(O)=CC=C1O						CCCCCCCCC(CCCCCC)C(=O)NC1=CC(=CC(=C1)C(=O)NC2=C(C=CC(=C2)O)O)NC(=O)C(CCCCCC)CCCCCCCC	FALSE		InChI=1S/C45H73N3O5/c1-5-9-13-17-19-23-27-35(25-21-15-11-7-3)43(51)46-38-31-37(45(53)48-41-34-40(49)29-30-42(41)50)32-39(33-38)47-44(52)36(26-22-16-12-8-4)28-24-20-18-14-10-6-2/h29-36,49-50H,5-28H2,1-4H3,(H,46,51)(H,47,52)(H,48,53)		InChI=1S/C45H73N3O5/c1-5-9-13-17-19-23-27-35(25-21-15-11-7-3)43(51)46-38-31-37(45(53)48-41-34-40(49)29-30-42(41)50)32-39(33-38)47-44(52)36(26-22-16-12-8-4)28-24-20-18-14-10-6-2/h29-36,49-50H,5-28H2,1-4H3,(H,46,51)(H,47,52)(H,48,53)		TRUE
2837	100.100.792	C 1812						406-320-0		Omitted undefined stereo in OpenBabel	organic	mono-constituent substance	NONS	Tonnage data confidential			CCCCCCCCCCCCC(N(CCCCCCCC)C(=O)CCC(O)=O)C1=NNC2=C(Cl)C(C)=NN12									InChI=1S/C30H52ClN5O3/c1-4-6-8-10-12-13-14-15-16-18-20-25(29-32-33-30-28(31)24(3)34-36(29)30)35(26(37)21-22-27(38)39)23-19-17-11-9-7-5-2/h25,33H,4-23H2,1-3H3,(H,38,39)
2849	100.100.795	HTA POLYMER						406-350-4		no	organic	mono-constituent substance	NONS	Tonnage data confidential	polymer		no SMILES	no SMILES							polymer (according to name)
9622	100.100.808	A mixture of: 1,3-dihex-5-en-1-yl-1,1,3,3-tetramethyldisiloxane; 1,3-dihex-x-en-1-yl-1,1,3,3-tetramethyldisiloxane x= 1,2,3 or 4						406-490-6	104360-37-4	yes	organic	mono-constituent substance	NONS	Tonnage data confidential			C[Si](C)(CCCCC=C)O[Si](C)(C)CCCCC=C			DTXCID701028092	C[Si](C)(CCCCC=C)O[Si](C)(C)CCCCC=C	TRUE	C[Si](C)(CCCCC=C)O[Si](C)(C)CCCCC=C	TRUE		InChI=1S/C16H34OSi2/c1-7-9-11-13-15-18(3,4)17-19(5,6)16-14-12-10-8-2/h7-8H,1-2,9-16H2,3-6H3	InChI=1S/C16H34OSi2/c1-7-9-11-13-15-18(3,4)17-19(5,6)16-14-12-10-8-2/h7-8H,1-2,9-16H2,3-6H3	InChI=1S/C16H34OSi2/c1-7-9-11-13-15-18(3,4)17-19(5,6)16-14-12-10-8-2/h7-8H,1-2,9-16H2,3-6H3			O([Si](CCCCC=C)(C)C)[Si](CCCCC=C)(C)C	InChI=1S/C16H34OSi2/c1-7-9-11-13-15-18(3,4)17-19(5,6)16-14-12-10-8-2/h7-8H,1-2,9-16H2,3-6H3	TRUE
4764	100.100.816	A mixture of isomers of: α,α'-oxybis(ethyleneoxycarbonylamino(3,1-(methyl)phenylene)aminocarbonyl)bispoly(oxypropylene)bis(methyl-3-(3-(2-trimethoxysilanylethylthio)propoxycarbonylamino)phenylcarbamate)						406-570-0		Omitted undefined stereo in OpenBabel	organic	mono-constituent substance	NONS	Tonnage data confidential			CO[Si](CCSCCCOC(=O)NC1=CC=CC(NC(=O)OCC(C)OC(=O)NC2=C(C)C(NC(=O)OCCCOCCOC(=O)NC3=CC=CC(NC(=O)OCC(C)OC(=O)NC4=C(C)C(NC(=O)OCCCSCC[Si](OC)(OC)OC)=CC=C4)=C3C)=CC=C2)=C1C)(OC)OC									InChI=1S/C63H92N8O23S2Si2/c1-42(40-91-60(76)68-52-24-13-20-48(44(52)3)65-57(73)88-30-18-34-95-36-38-97(80-7,81-8)82-9)93-62(78)70-54-26-15-22-50(46(54)5)64-56(72)87-29-17-28-86-32-33-90-59(75)67-49-21-14-25-53(45(49)4)69-61(77)92-41-43(2)94-63(79)71-55-27-16-23-51(47(55)6)66-58(74)89-31-19-35-96-37-39-98(83-10,84-11)85-12/h13-16,20-27,42-43H,17-19,28-41H2,1-12H3,(H,64,72)(H,65,73)(H,66,74)(H,67,7…
13991	100.100.838	ABSORBEUR UV BUK 4348						406-830-3	106556-36-9	yes	organic	mono-constituent substance	NONS	Tonnage data confidential			COC1=CC(O)=C(C=C1)C1=NC(=NC(=N1)C1=CC=CC=C1)C1=CC=CC=C1			DTXCID101028101	COC1=CC(O)=C(C=C1)C1=NC(=NC(=N1)C1=CC=CC=C1)C1=CC=CC=C1	TRUE	COC1=CC(=C(C=C1)C2=NC(=NC(=N2)C3=CC=CC=C3)C4=CC=CC=C4)O	FALSE		InChI=1S/C22H17N3O2/c1-27-17-12-13-18(19(26)14-17)22-24-20(15-8-4-2-5-9-15)23-21(25-22)16-10-6-3-7-11-16/h2-14,26H,1H3	InChI=1S/C22H17N3O2/c1-27-17-12-13-18(19(26)14-17)22-24-20(15-8-4-2-5-9-15)23-21(25-22)16-10-6-3-7-11-16/h2-14,26H,1H3	InChI=1S/C22H17N3O2/c1-27-17-12-13-18(19(26)14-17)22-24-20(15-8-4-2-5-9-15)23-21(25-22)16-10-6-3-7-11-16/h2-14,26H,1H3	TRUE	TRUE	OC1=C(C=2N=C(N=C(N2)C3=CC=CC=C3)C4=CC=CC=C4)C=CC(OC)=C1	InChI=1S/C22H17N3O2/c1-27-17-12-13-18(19(26)14-17)22-24-20(15-8-4-2-5-9-15)23-21(25-22)16-10-6-3-7-11-16/h2-14,26H,1H3	TRUE
14033	100.100.860	HEXYLKETOESTER						407-060-0	70203-04-2	Omitted undefined stereo in OpenBabel	organic	mono-constituent substance	NONS	Tonnage data confidential			CCCCCCC(C(C)=O)C(=O)OC			DTXCID90342926	CCCCCCC(C(C)=O)C(=O)OC	TRUE	CCCCCCC(C(=O)C)C(=O)OC	FALSE		InChI=1S/C11H20O3/c1-4-5-6-7-8-10(9(2)12)11(13)14-3/h10H,4-8H2,1-3H3	InChI=1S/C11H20O3/c1-4-5-6-7-8-10(9(2)12)11(13)14-3/h10H,4-8H2,1-3H3	InChI=1S/C11H20O3/c1-4-5-6-7-8-10(9(2)12)11(13)14-3/h10H,4-8H2,1-3H3	TRUE	TRUE
4858	100.100.868	UY-323						407-160-4		Omitted undefined stereo in OpenBabel	organic	mono-constituent substance	NONS	Tonnage data confidential			CCC(OC1=C(C=C(C=C1)C(C)(C)CC)C(C)(C)CC)C(=O)NC1=CC(NC(=O)C(N2C(=O)OC(C)(C)C2=O)C(=O)C(C)(C)C)=C(OC)C=C1						CCC(C(=O)NC1=CC(=C(C=C1)OC)NC(=O)C(C(=O)C(C)(C)C)N2C(=O)C(OC2=O)(C)C)OC3=C(C=C(C=C3)C(C)(C)CC)C(C)(C)CC	FALSE		InChI=1S/C39H55N3O8/c1-14-27(49-28-19-17-23(37(7,8)15-2)21-25(28)38(9,10)16-3)32(44)40-24-18-20-29(48-13)26(22-24)41-33(45)30(31(43)36(4,5)6)42-34(46)39(11,12)50-35(42)47/h17-22,27,30H,14-16H2,1-13H3,(H,40,44)(H,41,45)		InChI=1S/C39H55N3O8/c1-14-27(49-28-19-17-23(37(7,8)15-2)21-25(28)38(9,10)16-3)32(44)40-24-18-20-29(48-13)26(22-24)41-33(45)30(31(43)36(4,5)6)42-34(46)39(11,12)50-35(42)47/h17-22,27,30H,14-16H2,1-13H3,(H,40,44)(H,41,45)		TRUE
4846	100.100.873	NIR BLACK 78						407-210-5	113915-68-7	Omitted undefined stereo in OpenBabel	organic	mono-constituent substance	NONS	Tonnage data confidential			COC1=CC=C(C=C1)C(=C\C1(OC(=O)C2=C(Cl)C(Cl)=C(Cl)C(Cl)=C12)\C=C(/C1=CC=C(OC)C=C1)C1=CC=C(C=C1)N(C)C)\C1=CC=C(C=C1)N(C)C			DTXCID701028135	COC1=CC=C(C=C1)C(=CC1(OC(=O)C2=C1C(Cl)=C(Cl)C(Cl)=C2Cl)C=C(C1=CC=C(OC)C=C1)C1=CC=C(C=C1)N(C)C)C1=CC=C(C=C1)N(C)C	FALSE	CN(C)C1=CC=C(C=C1)/C(=C\C2(C3=C(C(=C(C(=C3Cl)Cl)Cl)Cl)C(=O)O2)/C=C(/C4=CC=C(C=C4)N(C)C)\C5=CC=C(C=C5)OC)/C6=CC=C(C=C6)OC	FALSE		InChI=1S/C42H36Cl4N2O4/c1-47(2)29-15-7-25(8-16-29)33(27-11-19-31(50-5)20-12-27)23-42(36-35(41(49)52-42)37(43)39(45)40(46)38(36)44)24-34(28-13-21-32(51-6)22-14-28)26-9-17-30(18-10-26)48(3)4/h7-24H,1-6H3/b33-23-,34-24+	InChI=1S/C42H36Cl4N2O4/c1-47(2)29-15-7-25(8-16-29)33(27-11-19-31(50-5)20-12-27)23-42(36-35(41(49)52-42)37(43)39(45)40(46)38(36)44)24-34(28-13-21-32(51-6)22-14-28)26-9-17-30(18-10-26)48(3)4/h7-24H,1-6H3	InChI=1S/C42H36Cl4N2O4/c1-47(2)29-15-7-25(8-16-29)33(27-11-19-31(50-5)20-12-27)23-42(36-35(41(49)52-42)37(43)39(45)40(46)38(36)44)24-34(28-13-21-32(51-6)22-14-28)26-9-17-30(18-10-26)48(3)4/h7-24H,1-6H3/b33-23-,34-24+	FALSE	TRUE	C(=C(C1=CC=C(N(C)C)C=C1)C2=CC=C(OC)C=C2)C3(C=C(C4=CC=C(N(C)C)C=C4)C5=CC=C(OC)C=C5)C=6C(C(=O)O3)=C(Cl)C(Cl)=C(Cl)C6Cl	InChI=1S/C42H36Cl4N2O4/c1-47(2)29-15-7-25(8-16-29)33(27-11-19-31(50-5)20-12-27)23-42(36-35(41(49)52-42)37(43)39(45)40(46)38(36)44)24-34(28-13-21-32(51-6)22-14-28)26-9-17-30(18-10-26)48(3)4/h7-24H,1-6H3	TRUE
14069	100.100.877	ACCELERINE 2191						407-260-8	132109-47-8	yes	organic	mono-constituent substance	NONS	Tonnage data confidential			OC1=CC=CC=C1C(=O)NCCN1CCN=C1C1=CC=CC=C1O			DTXCID101028218	OC1=CC=CC=C1C1=NCCN1CCNC(=O)C1=C(O)C=CC=C1	FALSE	C1CN(C(=N1)C2=CC=CC=C2O)CCNC(=O)C3=CC=CC=C3O	FALSE		InChI=1S/C18H19N3O3/c22-15-7-3-1-5-13(15)17-19-9-11-21(17)12-10-20-18(24)14-6-2-4-8-16(14)23/h1-8,22-23H,9-12H2,(H,20,24)	InChI=1S/C18H19N3O3/c22-15-7-3-1-5-13(15)17-19-9-11-21(17)12-10-20-18(24)14-6-2-4-8-16(14)23/h1-8,22-23H,9-12H2,(H,20,24)	InChI=1S/C18H19N3O3/c22-15-7-3-1-5-13(15)17-19-9-11-21(17)12-10-20-18(24)14-6-2-4-8-16(14)23/h1-8,22-23H,9-12H2,(H,20,24)	TRUE	TRUE	C(CNC(=O)C1=C(O)C=CC=C1)N2C(=NCC2)C3=C(O)C=CC=C3	InChI=1S/C18H19N3O3/c22-15-7-3-1-5-13(15)17-19-9-11-21(17)12-10-20-18(24)14-6-2-4-8-16(14)23/h1-8,22-23H,9-12H2,(H,20,24)	TRUE
4057	100.100.955	C-1809						408-130-3		yes	organic	mono-constituent substance	NONS	Tonnage data confidential			CCCCCCCCCCCCCCOC1=CC=CC=C1NC(=O)C1=CC(OC2=CC=C(CSC3=NN=NN3CC3=CC=C(CC3)OC)C=C2N(=O)=O)=C2C=CC=CC2=C1O									InChI=1S/C47H56N6O7S/c1-3-4-5-6-7-8-9-10-11-12-13-18-29-59-42-22-17-16-21-40(42)48-46(55)39-31-44(37-19-14-15-20-38(37)45(39)54)60-43-28-25-35(30-41(43)53(56)57)33-61-47-49-50-51-52(47)32-34-23-26-36(58-2)27-24-34/h14-17,19-23,25-26,28,30-31,54H,3-13,18,24,27,29,32-33H2,1-2H3,(H,48,55)
4075	100.100.956	AGK 2241						408-140-8		Omitted undefined stereo in OpenBabel	organic	mono-constituent substance	NONS	Tonnage data confidential			CCCCCCCCCCCCCCCCOC1=C(NC(=O)C(N2C=CN=C2C(=O)NC2=CC=CC=C2)C(=O)C(C)(C)C)C=C(C=C1)S(=O)(=O)NC(=O)CC						CCCCCCCCCCCCCCCCOC1=C(C=C(C=C1)S(=O)(=O)NC(=O)CC)NC(=O)C(C(=O)C(C)(C)C)N2C=CN=C2C(=O)NC3=CC=CC=C3	FALSE		InChI=1S/C42H61N5O7S/c1-6-8-9-10-11-12-13-14-15-16-17-18-19-23-30-54-35-27-26-33(55(52,53)46-36(48)7-2)31-34(35)45-40(50)37(38(49)42(3,4)5)47-29-28-43-39(47)41(51)44-32-24-21-20-22-25-32/h20-22,24-29,31,37H,6-19,23,30H2,1-5H3,(H,44,51)(H,45,50)(H,46,48)		InChI=1S/C42H61N5O7S/c1-6-8-9-10-11-12-13-14-15-16-17-18-19-23-30-54-35-27-26-33(55(52,53)46-36(48)7-2)31-34(35)45-40(50)37(38(49)42(3,4)5)47-29-28-43-39(47)41(51)44-32-24-21-20-22-25-32/h20-22,24-29,31,37H,6-19,23,30H2,1-5H3,(H,44,51)(H,45,50)(H,46,48)		TRUE
4092	100.100.983	CPSI						410-200-3	64900-65-8	missing cis/trans infomation	organic	mono-constituent substance	NONS	Tonnage data confidential			ClC1=CC=CC=C1S(=O)(=O)N=C=O			DTXCID7044394	ClC1=C(C=CC=C1)S(=O)(=O)N=C=O	FALSE	C1=CC=C(C(=C1)S(=O)(=O)N=C=O)Cl	FALSE		InChI=1S/C7H4ClNO3S/c8-6-3-1-2-4-7(6)13(11,12)9-5-10/h1-4H	InChI=1S/C7H4ClNO3S/c8-6-3-1-2-4-7(6)13(11,12)9-5-10/h1-4H	InChI=1S/C7H4ClNO3S/c8-6-3-1-2-4-7(6)13(11,12)9-5-10/h1-4H	TRUE	TRUE	S(N=C=O)(=O)(=O)C1=C(Cl)C=CC=C1	InChI=1S/C7H4ClNO3S/c8-6-3-1-2-4-7(6)13(11,12)9-5-10/h1-4H	TRUE
9608	100.101.021	A mixture of: [1-(methoxymethyl)-2-(C12-alkoxy)ethoxy]acetic acid; [1-(methoxymethyl)-2-(C14-alkoxy)ethoxy]acetic acid						410-640-6		Omitted undefined stereo in OpenBabel	organic	mono-constituent substance	NONS	Tonnage data confidential			CCCCCCCCCCCCCCCCCCOCC(COC)OCC(O)=O									InChI=1S/C24H48O5/c1-3-4-5-6-7-8-9-10-11-12-13-14-15-16-17-18-19-28-21-23(20-27-2)29-22-24(25)26/h23H,3-22H2,1-2H3,(H,25,26)
3282	100.101.030	C-1862						410-750-4		Omitted undefined stereo in OpenBabel	organic	mono-constituent substance	NONS	Tonnage data confidential			CCCCCCCCCCCCCC(=O)NC1=CC(NC2=NN(C(=O)C2SC2=CC=CC=C2NC(=O)C(CC)OC2=C(CCCCC)C=C(CCCCC)C=C2)C2=C(Cl)C=C(Cl)C=C2Cl)=C(Cl)C=C1									InChI=1S/C55H71Cl4N5O4S/c1-5-9-12-13-14-15-16-17-18-19-22-29-50(65)60-41-31-32-42(57)46(37-41)61-53-52(55(67)64(63-53)51-43(58)35-40(56)36-44(51)59)69-49-28-24-23-27-45(49)62-54(66)47(8-4)68-48-33-30-38(25-20-10-6-2)34-39(48)26-21-11-7-3/h23-24,27-28,30-37,47,52H,5-22,25-26,29H2,1-4H3,(H,60,65)(H,61,63)(H,62,66)
9624	100.101.055	MP-633						411-030-2		Omitted undefined stereo in OpenBabel	organic	mono-constituent substance	NONS	Tonnage data confidential			CC(=O)OCCN(C(=O)COC(C)=O)C1=C(I)C(C(=O)NCC(COC(C)=O)OC(C)=O)=C(I)C(C(=O)NCC(COC(C)=O)OC(C)=O)=C1I						CC(=O)OCCN(C1=C(C(=C(C(=C1I)C(=O)NCC(COC(=O)C)OC(=O)C)I)C(=O)NCC(COC(=O)C)OC(=O)C)I)C(=O)COC(=O)C	FALSE		InChI=1S/C30H36I3N3O15/c1-14(37)46-8-7-36(22(43)13-49-17(4)40)28-26(32)23(29(44)34-9-20(50-18(5)41)11-47-15(2)38)25(31)24(27(28)33)30(45)35-10-21(51-19(6)42)12-48-16(3)39/h20-21H,7-13H2,1-6H3,(H,34,44)(H,35,45)		InChI=1S/C30H36I3N3O15/c1-14(37)46-8-7-36(22(43)13-49-17(4)40)28-26(32)23(29(44)34-9-20(50-18(5)41)11-47-15(2)38)25(31)24(27(28)33)30(45)35-10-21(51-19(6)42)12-48-16(3)39/h20-21H,7-13H2,1-6H3,(H,34,44)(H,35,45)		TRUE
6496	100.101.059	A mixture of: 2,4 -bis(N'-(4-methylphenyl)ureido)toluene; 2,6 -bis(N'-(4-methylphenyl)ureido)toluene						411-070-0		yes	organic	mono-constituent substance	FULL	≥ 1 to < 10 tonnes			CC1=CC=C(NC(=O)NC2=CC=C(C)C(NC(=O)NC3=CC=C(C)C=C3)=C2)C=C1						CC1=CC=C(C=C1)NC(=O)NC2=CC(=C(C=C2)C)NC(=O)NC3=CC=C(C=C3)C	OK		InChI=1S/C23H24N4O2/c1-15-4-9-18(10-5-15)24-22(28)26-20-13-8-17(3)21(14-20)27-23(29)25-19-11-6-16(2)7-12-19/h4-14H,1-3H3,(H2,24,26,28)(H2,25,27,29)		InChI=1S/C23H24N4O2/c1-15-4-9-18(10-5-15)24-22(28)26-20-13-8-17(3)21(14-20)27-23(29)25-19-11-6-16(2)7-12-19/h4-14H,1-3H3,(H2,24,26,28)(H2,25,27,29)		TRUE
2500	100.101.123	(4-nitrophenyl)methyl [6R,(6α,7β)]-[3-hydroxy-5,8-dioxo-7-(phenoxyacetylamino)-5-thia-1-azabicyclo[4.2.0]oct-2-ene-2-carboxylate]						411-820-7		yes	organic	mono-constituent substance	NONS	Tonnage data confidential			[H][C@@]12[C@H](NC(=O)COC3=CC=CC=C3)C(=O)N1C(C(=O)OCC1=CC=C(C=C1)N(=O)=O)=C(O)CS2=O						C1C(=C(N2[C@H](S1=O)[C@@H](C2=O)NC(=O)COC3=CC=CC=C3)C(=O)OCC4=CC=C(C=C4)[N+](=O)[O-])O	OK		InChI=1S/C22H19N3O9S/c26-16-12-35(32)21-18(23-17(27)11-33-15-4-2-1-3-5-15)20(28)24(21)19(16)22(29)34-10-13-6-8-14(9-7-13)25(30)31/h1-9,18,21,26H,10-12H2,(H,23,27)/t18-,21-,35?/m1/s1		InChI=1S/C22H19N3O9S/c26-16-12-35(32)21-18(23-17(27)11-33-15-4-2-1-3-5-15)20(28)24(21)19(16)22(29)34-10-13-6-8-14(9-7-13)25(30)31/h1-9,18,21,26H,10-12H2,(H,23,27)/t18-,21-,35?/m1/s1		TRUE
2511	100.101.128	A mixture of: 3-cyano-5-(2-cyano-4-nitro-phenylazo)-2-(2-hydroxyethylamino)-4-methyl-6-[3-(2-phenoxyethoxy)propylamino]pyridine; 3-cyano-5-(2-cyano-4-nitro-phenylazo)-6-(2-hydroxyethylamino)-4-methyl-2-[3-(2-phenoxyethoxy)propylamino]pyridine; 3-cyano-5-(2-cyano-4-nitro-phenylazo)-2-amino-4-methyl-6-[3-(3-hydroxypropoxy)propylamino]pyridine; 3-cyano-5-(2-cyano-4-nitro-phenylazo)-6-amino-4-methyl-…						411-880-4	61799-13-1	missing cis/trans infomation	organic	mono-constituent substance	NONS	Cease manufacture			CC1=C(N=NC2=C(C=C(C=C2)N(=O)=O)C#N)C(NCCCOCCOC2=CC=CC=C2)=NC(NCCO)=C1C#N			DTXCID1043126	CC1=C(N=NC2=CC=C(C=C2C#N)[N+]([O-])=O)C(NCCCOCCOC2=CC=CC=C2)=NC(NCCO)=C1C#N	FALSE	CC1=C(C(=NC(=C1N=NC2=C(C=C(C=C2)[N+](=O)[O-])C#N)NCCCOCCOC3=CC=CC=C3)NCCO)C#N	FALSE		InChI=1S/C27H28N8O5/c1-19-23(18-29)26(31-11-12-36)32-27(30-10-5-13-39-14-15-40-22-6-3-2-4-7-22)25(19)34-33-24-9-8-21(35(37)38)16-20(24)17-28/h2-4,6-9,16,36H,5,10-15H2,1H3,(H2,30,31,32)	InChI=1S/C27H28N8O5/c1-19-23(18-29)26(31-11-12-36)32-27(30-10-5-13-39-14-15-40-22-6-3-2-4-7-22)25(19)34-33-24-9-8-21(35(37)38)16-20(24)17-28/h2-4,6-9,16,36H,5,10-15H2,1H3,(H2,30,31,32)	InChI=1S/C27H28N8O5/c1-19-23(18-29)26(31-11-12-36)32-27(30-10-5-13-39-14-15-40-22-6-3-2-4-7-22)25(19)34-33-24-9-8-21(35(37)38)16-20(24)17-28/h2-4,6-9,16,36H,5,10-15H2,1H3,(H2,30,31,32)	TRUE	TRUE	N(CCCOCCOC1=CC=CC=C1)C2=C(N=NC3=C(C#N)C=C(N(=O)=O)C=C3)C(C)=C(C#N)C(NCCO)=N2	InChI=1S/C27H28N8O5/c1-19-23(18-29)26(31-11-12-36)32-27(30-10-5-13-39-14-15-40-22-6-3-2-4-7-22)25(19)34-33-24-9-8-21(35(37)38)16-20(24)17-28/h2-4,6-9,16,36H,5,10-15H2,1H3,(H2,30,31,32)	TRUE
2546	100.101.151	B20590						412-150-8		missing cis/trans infomation	organic	mono-constituent substance	NONS	Tonnage data confidential			CCOC(=O)C1=NN(C(=O)C1=CC1=CC=C(C=C1)N(C)C)C1=CC=C(C=C1)C(O)=O						CCOC(=O)C1=NN(C(=O)C1=CC2=CC=C(C=C2)N(C)C)C3=CC=C(C=C3)C(=O)O	FALSE		InChI=1S/C22H21N3O5/c1-4-30-22(29)19-18(13-14-5-9-16(10-6-14)24(2)3)20(26)25(23-19)17-11-7-15(8-12-17)21(27)28/h5-13H,4H2,1-3H3,(H,27,28)		InChI=1S/C22H21N3O5/c1-4-30-22(29)19-18(13-14-5-9-16(10-6-14)24(2)3)20(26)25(23-19)17-11-7-15(8-12-17)21(27)28/h5-13H,4H2,1-3H3,(H,27,28)		TRUE
2993	100.101.209	3-(Ethylsulfonyl)pyridine-2-sulfonamide						412-810-5	117671-01-9	no SMILES	organic	mono-constituent substance	NONS	No longer valid	CCS(=O)(=O)C1=CC=CN=C1S(N)(=O)=O					DTXSID50869609	CCS(=O)(=O)C1=CC=CN=C1S(N)(=O)=O		CCS(=O)(=O)C1=C(N=CC=C1)S(=O)(=O)N				InChI=1S/C7H10N2O4S2/c1-2-14(10,11)6-4-3-5-9-7(6)15(8,12)13/h3-5H,2H2,1H3,(H2,8,12,13)	InChI=1S/C7H10N2O4S2/c1-2-14(10,11)6-4-3-5-9-7(6)15(8,12)13/h3-5H,2H2,1H3,(H2,8,12,13)		TRUE	S(CC)(=O)(=O)C1=C(S(N)(=O)=O)N=CC=C1	InChI=1S/C7H10N2O4S2/c1-2-14(10,11)6-4-3-5-9-7(6)15(8,12)13/h3-5H,2H2,1H3,(H2,8,12,13)	TRUE
9415	100.101.213	CGL 411 ISO						412-860-8	137759-38-7	yes	organic	mono-constituent substance	NONS	Tonnage data confidential			CC(C)CCCCCOC1=CC(O)=C(C=C1)C1=NC(=NC(=N1)C1=CC=C(C)C=C1C)C1=CC=C(C)C=C1C			DTXCID70572401	CC(C)CCCCCOC1=CC(=O)C(C=C1)=C1N=C(NC(=N1)C1=C(C)C=C(C)C=C1)C1=C(C)C=C(C)C=C1	Tautomer	CC1=CC(=C(C=C1)C2=NC(=NC(=N2)C3=C(C=C(C=C3)OCCCCCC(C)C)O)C4=C(C=C(C=C4)C)C)C	FALSE		InChI=1S/C33H39N3O2/c1-21(2)10-8-7-9-17-38-26-13-16-29(30(37)20-26)33-35-31(27-14-11-22(3)18-24(27)5)34-32(36-33)28-15-12-23(4)19-25(28)6/h11-16,18-21,37H,7-10,17H2,1-6H3	InChI=1S/C33H39N3O2/c1-21(2)10-8-7-9-17-38-26-13-16-29(30(37)20-26)33-35-31(27-14-11-22(3)18-24(27)5)34-32(36-33)28-15-12-23(4)19-25(28)6/h11-16,18-21H,7-10,17H2,1-6H3,(H,34,35,36)	InChI=1S/C33H39N3O2/c1-21(2)10-8-7-9-17-38-26-13-16-29(30(37)20-26)33-35-31(27-14-11-22(3)18-24(27)5)34-32(36-33)28-15-12-23(4)19-25(28)6/h11-16,18-21,37H,7-10,17H2,1-6H3	FALSE	TRUE
3038	100.101.224	T-3FCL.F						412-970-6		yes	organic	mono-constituent substance	NONS	Tonnage data confidential			CCCC1=CC=C(C=C1)C1=C(F)C=C(C=C1)C1=CC(F)=C(Cl)C=C1						CCCC1=CC=C(C=C1)C2=C(C=C(C=C2)C3=CC(=C(C=C3)Cl)F)F	FALSE		InChI=1S/C21H17ClF2/c1-2-3-14-4-6-15(7-5-14)18-10-8-16(12-20(18)23)17-9-11-19(22)21(24)13-17/h4-13H,2-3H2,1H3		InChI=1S/C21H17ClF2/c1-2-3-14-4-6-15(7-5-14)18-10-8-16(12-20(18)23)17-9-11-19(22)21(24)13-17/h4-13H,2-3H2,1H3		TRUE
3016	100.101.225	T-3FCLF						412-980-0		yes	organic	mono-constituent substance	NONS	Tonnage data confidential			CCCC1=CC=C(C=C1)C1=C(F)C=C(C=C1)C1=C(F)C=C(Cl)C=C1						CCCC1=CC=C(C=C1)C2=C(C=C(C=C2)C3=C(C=C(C=C3)Cl)F)F	FALSE		InChI=1S/C21H17ClF2/c1-2-3-14-4-6-15(7-5-14)18-10-8-16(12-20(18)23)19-11-9-17(22)13-21(19)24/h4-13H,2-3H2,1H3		InChI=1S/C21H17ClF2/c1-2-3-14-4-6-15(7-5-14)18-10-8-16(12-20(18)23)19-11-9-17(22)13-21(19)24/h4-13H,2-3H2,1H3		TRUE
3050	100.101.227	T-5FCLF						413-000-4		yes	organic	mono-constituent substance	NONS	Tonnage data confidential			CCCCCC1=CC=C(C=C1)C1=C(F)C=C(C=C1)C1=C(F)C=C(Cl)C=C1						CCCCCC1=CC=C(C=C1)C2=C(C=C(C=C2)C3=C(C=C(C=C3)Cl)F)F	FALSE		InChI=1S/C23H21ClF2/c1-2-3-4-5-16-6-8-17(9-7-16)20-12-10-18(14-22(20)25)21-13-11-19(24)15-23(21)26/h6-15H,2-5H2,1H3		InChI=1S/C23H21ClF2/c1-2-3-4-5-16-6-8-17(9-7-16)20-12-10-18(14-22(20)25)21-13-11-19(24)15-23(21)26/h6-15H,2-5H2,1H3		TRUE
4491	100.101.259	KE 2627						413-350-8	6624-73-3	yes	organic	mono-constituent substance	NONS	Tonnage data confidential			O=C(OCCCCCOC(=O)C1=CC=CC=C1)C1=CC=CC=C1			DTXCID3027538	O=C(OCCCCCOC(=O)C1=CC=CC=C1)C1=CC=CC=C1	TRUE	C1=CC=C(C=C1)C(=O)OCCCCCOC(=O)C2=CC=CC=C2	FALSE		InChI=1S/C19H20O4/c20-18(16-10-4-1-5-11-16)22-14-8-3-9-15-23-19(21)17-12-6-2-7-13-17/h1-2,4-7,10-13H,3,8-9,14-15H2	InChI=1S/C19H20O4/c20-18(16-10-4-1-5-11-16)22-14-8-3-9-15-23-19(21)17-12-6-2-7-13-17/h1-2,4-7,10-13H,3,8-9,14-15H2	InChI=1S/C19H20O4/c20-18(16-10-4-1-5-11-16)22-14-8-3-9-15-23-19(21)17-12-6-2-7-13-17/h1-2,4-7,10-13H,3,8-9,14-15H2	TRUE	TRUE
9514	100.101.262	N,N-di-[poly(oxyethylene)-co-poly(oxypropylene)]-4-[(3,5-dicyano-4-methyl-2-thienyl)azo)]-3-methylaniline						413-380-1		missing cis/trans infomation	organic	mono-constituent substance	NONS	Tonnage data confidential			[H]OCCCOCCN(CCOCCCO[H])C1=CC=C(N=NC2=C(C#N)C(C)=C(S2)C#N)C(C)=C1									InChI=1S/C24H31N5O4S/c1-18-15-20(29(7-13-32-11-3-9-30)8-14-33-12-4-10-31)5-6-22(18)27-28-24-21(16-25)19(2)23(17-26)34-24/h5-6,15,30-31H,3-4,7-14H2,1-2H3
4513	100.101.269	FT-5.FCL						413-450-1		yes	organic	mono-constituent substance	NONS	Tonnage data confidential			CCCCCC1=CC=C(C(F)=C1)C1=CC(F)=C(C=C1)C1=CC=C(Cl)C=C1						CCCCCC1=CC(=C(C=C1)C2=CC(=C(C=C2)C3=CC=C(C=C3)Cl)F)F	FALSE		InChI=1S/C23H21ClF2/c1-2-3-4-5-16-6-12-21(22(25)14-16)18-9-13-20(23(26)15-18)17-7-10-19(24)11-8-17/h6-15H,2-5H2,1H3		InChI=1S/C23H21ClF2/c1-2-3-4-5-16-6-12-21(22(25)14-16)18-9-13-20(23(26)15-18)17-7-10-19(24)11-8-17/h6-15H,2-5H2,1H3		TRUE
4541	100.101.283	N-90						413-620-5	114747-29-4	Omitted undefined stereo in OpenBabel	organic	mono-constituent substance	NONS	Tonnage data confidential			CCCCCCCCCCCCS(=O)(=O)CC(C)C(=O)NC1=CC(NC(=O)C(N2C(=O)CN(CC3=CC=CC=C3)C2=O)C(=O)C(C)(C)C)=C(Cl)C=C1			DTXCID201028142	CCCCCCCCCCCCS(=O)(=O)CC(C)C(=O)NC1=CC=C(Cl)C(NC(=O)C(N2C(=O)CN(CC3=CC=CC=C3)C2=O)C(=O)C(C)(C)C)=C1	FALSE	CCCCCCCCCCCCS(=O)(=O)CC(C)C(=O)NC1=CC(=C(C=C1)Cl)NC(=O)C(C(=O)C(C)(C)C)N2C(=O)CN(C2=O)CC3=CC=CC=C3	FALSE		InChI=1S/C39H55ClN4O7S/c1-6-7-8-9-10-11-12-13-14-18-23-52(50,51)27-28(2)36(47)41-30-21-22-31(40)32(24-30)42-37(48)34(35(46)39(3,4)5)44-33(45)26-43(38(44)49)25-29-19-16-15-17-20-29/h15-17,19-22,24,28,34H,6-14,18,23,25-27H2,1-5H3,(H,41,47)(H,42,48)	InChI=1S/C39H55ClN4O7S/c1-6-7-8-9-10-11-12-13-14-18-23-52(50,51)27-28(2)36(47)41-30-21-22-31(40)32(24-30)42-37(48)34(35(46)39(3,4)5)44-33(45)26-43(38(44)49)25-29-19-16-15-17-20-29/h15-17,19-22,24,28,34H,6-14,18,23,25-27H2,1-5H3,(H,41,47)(H,42,48)	InChI=1S/C39H55ClN4O7S/c1-6-7-8-9-10-11-12-13-14-18-23-52(50,51)27-28(2)36(47)41-30-21-22-31(40)32(24-30)42-37(48)34(35(46)39(3,4)5)44-33(45)26-43(38(44)49)25-29-19-16-15-17-20-29/h15-17,19-22,24,28,34H,6-14,18,23,25-27H2,1-5H3,(H,41,47)(H,42,48)	TRUE	TRUE	C(C(NC1=CC(NC(C(CS(CCCCCCCCCCCC)(=O)=O)C)=O)=CC=C1Cl)=O)(C(C(C)(C)C)=O)N2C(=O)N(CC3=CC=CC=C3)CC2=O	InChI=1S/C39H55ClN4O7S/c1-6-7-8-9-10-11-12-13-14-18-23-52(50,51)27-28(2)36(47)41-30-21-22-31(40)32(24-30)42-37(48)34(35(46)39(3,4)5)44-33(45)26-43(38(44)49)25-29-19-16-15-17-20-29/h15-17,19-22,24,28,34H,6-14,18,23,25-27H2,1-5H3,(H,41,47)(H,42,48)	TRUE
4545	100.101.284	A mixture of: 5-(N-methylperfluorooctylsulfonamido)methyl-3-octadecyl-1,3-oxazolidin-2-one; 5-(N-methylperfluoroheptylsulfonamido)methyl-3-octadecyl-1,3-oxazolidin-2-one						413-640-4	138704-55-9	Omitted undefined stereo in OpenBabel	organic	mono-constituent substance	NONS	Tonnage data confidential			CCCCCCCCCCCCCCCCCCN1CC(CN(C)S(=O)(=O)C(F)(F)C(F)(F)C(F)(F)C(F)(F)C(F)(F)C(F)(F)C(F)(F)C(F)(F)F)OC1=O			DTXCID801323328	CCCCCCCCCCCCCCCCCCN1CC(CN(C)S(=O)(=O)C(F)(F)C(F)(F)C(F)(F)C(F)(F)C(F)(F)C(F)(F)C(F)(F)C(F)(F)F)OC1=O	TRUE	CCCCCCCCCCCCCCCCCCN1CC(OC1=O)CN(C)S(=O)(=O)C(C(C(C(C(C(C(C(F)(F)F)(F)F)(F)F)(F)F)(F)F)(F)F)(F)F)(F)F	FALSE		InChI=1S/C31H45F17N2O4S/c1-3-4-5-6-7-8-9-10-11-12-13-14-15-16-17-18-19-50-21-22(54-23(50)51)20-49(2)55(52,53)31(47,48)29(42,43)27(38,39)25(34,35)24(32,33)26(36,37)28(40,41)30(44,45)46/h22H,3-21H2,1-2H3	InChI=1S/C31H45F17N2O4S/c1-3-4-5-6-7-8-9-10-11-12-13-14-15-16-17-18-19-50-21-22(54-23(50)51)20-49(2)55(52,53)31(47,48)29(42,43)27(38,39)25(34,35)24(32,33)26(36,37)28(40,41)30(44,45)46/h22H,3-21H2,1-2H3	InChI=1S/C31H45F17N2O4S/c1-3-4-5-6-7-8-9-10-11-12-13-14-15-16-17-18-19-50-21-22(54-23(50)51)20-49(2)55(52,53)31(47,48)29(42,43)27(38,39)25(34,35)24(32,33)26(36,37)28(40,41)30(44,45)46/h22H,3-21H2,1-2H3		TRUE
4557	100.101.288	AF-394						413-680-2	71067-09-9	yes	organic	mono-constituent substance	NONS	Tonnage data confidential			CCCCCCCCCCCCCCCCOC(=O)C1=CC=C(O)C=C1			DTXCID40268102	CCCCCCCCCCCCCCCCOC(=O)C1=CC=C(O)C=C1	TRUE	CCCCCCCCCCCCCCCCOC(=O)C1=CC=C(C=C1)O	FALSE		InChI=1S/C23H38O3/c1-2-3-4-5-6-7-8-9-10-11-12-13-14-15-20-26-23(25)21-16-18-22(24)19-17-21/h16-19,24H,2-15,20H2,1H3	InChI=1S/C23H38O3/c1-2-3-4-5-6-7-8-9-10-11-12-13-14-15-20-26-23(25)21-16-18-22(24)19-17-21/h16-19,24H,2-15,20H2,1H3	InChI=1S/C23H38O3/c1-2-3-4-5-6-7-8-9-10-11-12-13-14-15-20-26-23(25)21-16-18-22(24)19-17-21/h16-19,24H,2-15,20H2,1H3	TRUE	TRUE
4564	100.101.291	Reaction mass of 5-sec-butyl-2-(2,4-dimethylcyclohex-3-en-1-yl)-5-methyl-1,3-dioxane and 5-sec-butyl-2-(4,6-dimethylcyclohex-3-en-1-yl)-5-methyl-1,3-dioxane						413-720-9	117933-89-8	Omitted undefined stereo in OpenBabel	organic	mono-constituent substance	NONS	Tonnage data confidential			CCC(C)C1(C)COC(OC1)C1CCC(C)=CC1C				CCC(C)C1(C)COC(OC1)C1CCC(C)=CC1C	TRUE	CCC(C)C1(COC(OC1)C2CCC(=CC2C)C)C	FALSE		InChI=1S/C17H30O2/c1-6-14(4)17(5)10-18-16(19-11-17)15-8-7-12(2)9-13(15)3/h9,13-16H,6-8,10-11H2,1-5H3	InChI=1S/C17H30O2/c1-6-14(4)17(5)10-18-16(19-11-17)15-8-7-12(2)9-13(15)3/h9,13-16H,6-8,10-11H2,1-5H3	InChI=1S/C17H30O2/c1-6-14(4)17(5)10-18-16(19-11-17)15-8-7-12(2)9-13(15)3/h9,13-16H,6-8,10-11H2,1-5H3	TRUE	TRUE	CC1C(CCC(C)=C1)C2OCC(C(CC)C)(C)CO2	InChI=1S/C17H30O2/c1-6-14(4)17(5)10-18-16(19-11-17)15-8-7-12(2)9-13(15)3/h9,13-16H,6-8,10-11H2,1-5H3	TRUE
4600	100.101.296	A mixture of: dodecyloxy-1-methyl-1-[oxy-poly-(2-hydroxymethylethanoxy)]pentadecane; dodecyloxy-1-methyl-1-[oxy-poly-(2-hydroxymethylethanoxy)]heptadecane						413-780-6		Omitted undefined stereo in OpenBabel	organic	mono-constituent substance	NONS	Tonnage data confidential			[H]OC(CO)COC(CCCCCCCCCCCCCCCC)COCCCCCCCCCCCC									InChI=1S/C33H68O4/c1-3-5-7-9-11-13-15-16-17-18-19-21-23-25-27-33(37-30-32(35)29-34)31-36-28-26-24-22-20-14-12-10-8-6-4-2/h32-35H,3-31H2,1-2H3
5041	100.101.311	A-93536.0						413-940-5	27957-91-1	yes	organic	mono-constituent substance	NONS	Tonnage data confidential			COC(=O)[C@@H]1CCCN1C						CN1CCC[C@H]1C(=O)OC	FALSE		InChI=1S/C7H13NO2/c1-8-5-3-4-6(8)7(9)10-2/h6H,3-5H2,1-2H3/t6-/m0/s1		InChI=1S/C7H13NO2/c1-8-5-3-4-6(8)7(9)10-2/h6H,3-5H2,1-2H3/t6-/m0/s1		TRUE
5045	100.101.312	SCHERCEMOL 145						413-960-4	144610-93-5	yes	organic	mono-constituent substance	NONS	No longer valid			CCCCCCCCCCCCCCOC(=O)C(C)(C)C			DTXCID8085262	CCCCCCCCCCCCCCOC(=O)C(C)(C)C	TRUE	CCCCCCCCCCCCCCOC(=O)C(C)(C)C	TRUE		InChI=1S/C19H38O2/c1-5-6-7-8-9-10-11-12-13-14-15-16-17-21-18(20)19(2,3)4/h5-17H2,1-4H3	InChI=1S/C19H38O2/c1-5-6-7-8-9-10-11-12-13-14-15-16-17-21-18(20)19(2,3)4/h5-17H2,1-4H3	InChI=1S/C19H38O2/c1-5-6-7-8-9-10-11-12-13-14-15-16-17-21-18(20)19(2,3)4/h5-17H2,1-4H3	TRUE	TRUE
5074	100.101.323	MIPPO-2						414-090-8		Omitted undefined stereo in OpenBabel	organic	mono-constituent substance	NONS	Tonnage data confidential			COCC(C)COC(C)COC									InChI=1S/C9H20O3/c1-8(5-10-3)6-12-9(2)7-11-4/h8-9H,5-7H2,1-4H3
5090	100.101.328	A-98333						414-160-8		Omitted undefined stereo in OpenBabel	organic	mono-constituent substance	NONS	Tonnage data confidential			OC(=O)C1=C2CSC(N2C=C1)C1=CC=CN=C1						C1C2=C(C=CN2C(S1)C3=CN=CC=C3)C(=O)O	FALSE		InChI=1S/C12H10N2O2S/c15-12(16)9-3-5-14-10(9)7-17-11(14)8-2-1-4-13-6-8/h1-6,11H,7H2,(H,15,16)		InChI=1S/C12H10N2O2S/c15-12(16)9-3-5-14-10(9)7-17-11(14)8-2-1-4-13-6-8/h1-6,11H,7H2,(H,15,16)		TRUE
5138	100.101.344	KROMO-II						414-320-7	16150-45-1	yes	organic	mono-constituent substance	NONS	No longer valid			CCOC(=O)C1=CC(=O)C2=C(OCC(O)COC3=CC=CC4=C3C(=O)C=C(O4)C(=O)OCC)C=CC=C2O1			DTXCID9089655	CCOC(=O)C1=CC(=O)C2=C(O1)C=CC=C2OCC(O)COC1=CC=CC2=C1C(=O)C=C(O2)C(=O)OCC	FALSE	CCOC(=O)C1=CC(=O)C2=C(O1)C=CC=C2OCC(COC3=CC=CC4=C3C(=O)C=C(O4)C(=O)OCC)O	FALSE		InChI=1S/C27H24O11/c1-3-33-26(31)22-11-16(29)24-18(7-5-9-20(24)37-22)35-13-15(28)14-36-19-8-6-10-21-25(19)17(30)12-23(38-21)27(32)34-4-2/h5-12,15,28H,3-4,13-14H2,1-2H3	InChI=1S/C27H24O11/c1-3-33-26(31)22-11-16(29)24-18(7-5-9-20(24)37-22)35-13-15(28)14-36-19-8-6-10-21-25(19)17(30)12-23(38-21)27(32)34-4-2/h5-12,15,28H,3-4,13-14H2,1-2H3	InChI=1S/C27H24O11/c1-3-33-26(31)22-11-16(29)24-18(7-5-9-20(24)37-22)35-13-15(28)14-36-19-8-6-10-21-25(19)17(30)12-23(38-21)27(32)34-4-2/h5-12,15,28H,3-4,13-14H2,1-2H3	TRUE	TRUE	O(CC(COC1=C2C(OC(C(OCC)=O)=CC2=O)=CC=C1)O)C3=C4C(OC(C(OCC)=O)=CC4=O)=CC=C3	InChI=1S/C27H24O11/c1-3-33-26(31)22-11-16(29)24-18(7-5-9-20(24)37-22)35-13-15(28)14-36-19-8-6-10-21-25(19)17(30)12-23(38-21)27(32)34-4-2/h5-12,15,28H,3-4,13-14H2,1-2H3	TRUE
8915	100.101.365	MORPHOLINE ADDUCT						414-560-2	71487-08-6	yes	organic	mono-constituent substance	NONS	Tonnage data confidential			O=C(CCN1CCOCC1)OCCOCCOCCOCCOC(=O)CCN1CCOCC1			DTXCID5047033	O=C(CCN1CCOCC1)OCCOCCOCCOCCOC(=O)CCN1CCOCC1	TRUE	C1COCCN1CCC(=O)OCCOCCOCCOCCOC(=O)CCN2CCOCC2	FALSE		InChI=1S/C22H40N2O9/c25-21(1-3-23-5-9-27-10-6-23)32-19-17-30-15-13-29-14-16-31-18-20-33-22(26)2-4-24-7-11-28-12-8-24/h1-20H2	InChI=1S/C22H40N2O9/c25-21(1-3-23-5-9-27-10-6-23)32-19-17-30-15-13-29-14-16-31-18-20-33-22(26)2-4-24-7-11-28-12-8-24/h1-20H2	InChI=1S/C22H40N2O9/c25-21(1-3-23-5-9-27-10-6-23)32-19-17-30-15-13-29-14-16-31-18-20-33-22(26)2-4-24-7-11-28-12-8-24/h1-20H2	TRUE	TRUE	C(CC(OCCOCCOCCOCCOC(CCN1CCOCC1)=O)=O)N2CCOCC2	InChI=1S/C22H40N2O9/c25-21(1-3-23-5-9-27-10-6-23)32-19-17-30-15-13-29-14-16-31-18-20-33-22(26)2-4-24-7-11-28-12-8-24/h1-20H2	TRUE
3787	100.101.373	FC 4001 STAGE 1						414-640-7		missing cis/trans infomation	organic	mono-constituent substance	NONS	Tonnage data confidential			OC(=O)C=NNC1=CC=C(Cl)C=C1						C1=CC(=CC=C1NN=CC(=O)O)Cl	FALSE		InChI=1S/C8H7ClN2O2/c9-6-1-3-7(4-2-6)11-10-5-8(12)13/h1-5,11H,(H,12,13)		InChI=1S/C8H7ClN2O2/c9-6-1-3-7(4-2-6)11-10-5-8(12)13/h1-5,11H,(H,12,13)		TRUE
3790	100.101.374	CX1036						414-650-1	6248-28-8	yes	organic	mono-constituent substance	NONS	Tonnage data confidential			O=C(N1CCCCCC1=O)C1=CC=CC=C1			DTXCID00134011	O=C(N1CCCCCC1=O)C1=CC=CC=C1	TRUE	C1CCC(=O)N(CC1)C(=O)C2=CC=CC=C2	FALSE		InChI=1S/C13H15NO2/c15-12-9-5-2-6-10-14(12)13(16)11-7-3-1-4-8-11/h1,3-4,7-8H,2,5-6,9-10H2	InChI=1S/C13H15NO2/c15-12-9-5-2-6-10-14(12)13(16)11-7-3-1-4-8-11/h1,3-4,7-8H,2,5-6,9-10H2	InChI=1S/C13H15NO2/c15-12-9-5-2-6-10-14(12)13(16)11-7-3-1-4-8-11/h1,3-4,7-8H,2,5-6,9-10H2	TRUE	TRUE	C(=O)(N1C(=O)CCCCC1)C2=CC=CC=C2	InChI=1S/C13H15NO2/c15-12-9-5-2-6-10-14(12)13(16)11-7-3-1-4-8-11/h1,3-4,7-8H,2,5-6,9-10H2	TRUE
3798	100.101.377	BGS93						414-680-5		yes	organic	mono-constituent substance	NONS	Tonnage data confidential			CCSC1=CC=C(C=C1)C1=NC(=NC(=N1)C(Cl)(Cl)Cl)C(Cl)(Cl)Cl						CCSC1=CC=C(C=C1)C2=NC(=NC(=N2)C(Cl)(Cl)Cl)C(Cl)(Cl)Cl	FALSE		InChI=1S/C13H9Cl6N3S/c1-2-23-8-5-3-7(4-6-8)9-20-10(12(14,15)16)22-11(21-9)13(17,18)19/h3-6H,2H2,1H3		InChI=1S/C13H9Cl6N3S/c1-2-23-8-5-3-7(4-6-8)9-20-10(12(14,15)16)22-11(21-9)13(17,18)19/h3-6H,2H2,1H3		TRUE
12885	100.101.382	A-87861.0						414-750-5		Omitted undefined stereo in OpenBabel	organic	mono-constituent substance	NONS	Tonnage data confidential			CC(C)C(NC(=O)N(C)CC1=CSC(=N1)C(C)C)C(O)=O						CC(C)C1=NC(=CS1)CN(C)C(=O)NC(C(C)C)C(=O)O	FALSE		InChI=1S/C14H23N3O3S/c1-8(2)11(13(18)19)16-14(20)17(5)6-10-7-21-12(15-10)9(3)4/h7-9,11H,6H2,1-5H3,(H,16,20)(H,18,19)		InChI=1S/C14H23N3O3S/c1-8(2)11(13(18)19)16-14(20)17(5)6-10-7-21-12(15-10)9(3)4/h7-9,11H,6H2,1-5H3,(H,16,20)(H,18,19)		TRUE
8978	100.101.398	2,5-Dichloro-4-(1,1,2,3,3,3-hexafluoropropoxy)phenylamine						414-940-8	103015-84-5	Omitted undefined stereo in OpenBabel	organic	mono-constituent substance	NONS	Tonnage data confidential			NC1=CC(Cl)=C(OC(F)(F)C(F)C(F)(F)F)C=C1Cl			DTXCID10382869	NC1=CC(Cl)=C(OC(F)(F)C(F)C(F)(F)F)C=C1Cl	TRUE	C1=C(C(=CC(=C1Cl)OC(C(C(F)(F)F)F)(F)F)Cl)N	FALSE		InChI=1S/C9H5Cl2F6NO/c10-3-2-6(4(11)1-5(3)18)19-9(16,17)7(12)8(13,14)15/h1-2,7H,18H2	InChI=1S/C9H5Cl2F6NO/c10-3-2-6(4(11)1-5(3)18)19-9(16,17)7(12)8(13,14)15/h1-2,7H,18H2	InChI=1S/C9H5Cl2F6NO/c10-3-2-6(4(11)1-5(3)18)19-9(16,17)7(12)8(13,14)15/h1-2,7H,18H2	TRUE	TRUE	O(C(C(C(F)(F)F)F)(F)F)C1=C(Cl)C=C(N)C(Cl)=C1	InChI=1S/C9H5Cl2F6NO/c10-3-2-6(4(11)1-5(3)18)19-9(16,17)7(12)8(13,14)15/h1-2,7H,18H2	TRUE
4255	100.101.409	A mixture of: (+/-)-trans-3-ethoxycarbonyl-4-(4'-fluorophenyl)-N-methylpiperidine-2,6-dione; (+/-)-trans-3-methoxycarbonyl-4-(4'-fluorophenyl)-N-methylpiperidine-2,6-dione						415-080-6		yes	organic	mono-constituent substance	NONS	Tonnage data confidential			CCOC(=O)[C@H]1[C@@H](CC(=O)N(C)C1=O)C1=CC=C(F)C=C1						CCOC(=O)[C@H]1[C@@H](CC(=O)N(C1=O)C)C2=CC=C(C=C2)F	OK		InChI=1S/C15H16FNO4/c1-3-21-15(20)13-11(8-12(18)17(2)14(13)19)9-4-6-10(16)7-5-9/h4-7,11,13H,3,8H2,1-2H3/t11-,13-/m0/s1		InChI=1S/C15H16FNO4/c1-3-21-15(20)13-11(8-12(18)17(2)14(13)19)9-4-6-10(16)7-5-9/h4-7,11,13H,3,8H2,1-2H3/t11-,13-/m0/s1		TRUE
9286	100.101.415	BUCA						415-140-1		Omitted undefined stereo in OpenBabel	organic	mono-constituent substance	NONS	Tonnage data confidential			CC(OC(=O)CCl)C#C						CC(C#C)OC(=O)CCl	FALSE		InChI=1S/C6H7ClO2/c1-3-5(2)9-6(8)4-7/h1,5H,4H2,2H3		InChI=1S/C6H7ClO2/c1-3-5(2)9-6(8)4-7/h1,5H,4H2,2H3		TRUE
4288	100.101.421	SB-217063						415-200-7		Omitted undefined stereo in OpenBabel	organic	mono-constituent substance	NONS	Tonnage data confidential			CCCCC1=NC=C(C(O)S(O)(=O)=O)N1CC1=CC=C(C=C1)C(O)=O						CCCCC1=NC=C(N1CC2=CC=C(C=C2)C(=O)O)C(O)S(=O)(=O)O	FALSE		InChI=1S/C16H20N2O6S/c1-2-3-4-14-17-9-13(16(21)25(22,23)24)18(14)10-11-5-7-12(8-6-11)15(19)20/h5-9,16,21H,2-4,10H2,1H3,(H,19,20)(H,22,23,24)		InChI=1S/C16H20N2O6S/c1-2-3-4-14-17-9-13(16(21)25(22,23)24)18(14)10-11-5-7-12(8-6-11)15(19)20/h5-9,16,21H,2-4,10H2,1H3,(H,19,20)(H,22,23,24)		TRUE
4298	100.101.426	HYAFF 11						415-250-1		Omitted undefined stereo in OpenBabel	organic	mono-constituent substance	NONS	Tonnage data confidential			CC(=O)NC1C(O)C(O)C(CO)OC1OC1C(O)C(O)C(O)OC1C(=O)OCC1=CC=CC=C1						CC(=O)NC1C(C(C(OC1OC2C(C(C(OC2C(=O)OCC3=CC=CC=C3)O)O)O)CO)O)O	FALSE		InChI=1S/C21H29NO12/c1-9(24)22-12-14(26)13(25)11(7-23)32-21(12)34-17-15(27)16(28)19(29)33-18(17)20(30)31-8-10-5-3-2-4-6-10/h2-6,11-19,21,23,25-29H,7-8H2,1H3,(H,22,24)		InChI=1S/C21H29NO12/c1-9(24)22-12-14(26)13(25)11(7-23)32-21(12)34-17-15(27)16(28)19(29)33-18(17)20(30)31-8-10-5-3-2-4-6-10/h2-6,11-19,21,23,25-29H,7-8H2,1H3,(H,22,24)		TRUE
4304	100.101.428	AMBU						415-280-3		Omitted undefined stereo in OpenBabel	organic	mono-constituent substance	NONS	Tonnage data confidential			COC1=CC=C(C=C1)C(=O)OCC1OC2CC1OC1=NC(=O)C=CN21									InChI=1S/C17H16N2O6/c1-22-11-4-2-10(3-5-11)16(21)23-9-13-12-8-15(24-13)19-7-6-14(20)18-17(19)25-12/h2-7,12-13,15H,8-9H2,1H3
4311	100.101.431	CREMEROL HMG						415-310-5		missing cis/trans infomation	organic	mono-constituent substance	NONS	No longer valid			CCCCCCCCCCCCCCCCCC(=O)OC(COC(=O)CCCCCCCCCCCCCCC)COC(=O)CCCCCCCC=CCCCCCCCC						CCCCCCCCCCCCCCCCCC(=O)OC(COC(=O)CCCCCCCCCCCCCCC)COC(=O)CCCCCCCC=CCCCCCCCC	TRUE		InChI=1S/C55H104O6/c1-4-7-10-13-16-19-22-25-27-30-33-36-39-42-45-48-54(57)60-51-52(50-59-53(56)47-44-41-38-35-32-29-24-21-18-15-12-9-6-3)61-55(58)49-46-43-40-37-34-31-28-26-23-20-17-14-11-8-5-2/h25,27,52H,4-24,26,28-51H2,1-3H3		InChI=1S/C55H104O6/c1-4-7-10-13-16-19-22-25-27-30-33-36-39-42-45-48-54(57)60-51-52(50-59-53(56)47-44-41-38-35-32-29-24-21-18-15-12-9-6-3)61-55(58)49-46-43-40-37-34-31-28-26-23-20-17-14-11-8-5-2/h25,27,52H,4-24,26,28-51H2,1-3H3		TRUE
4315	100.101.432	F408						415-320-1		yes	organic	mono-constituent substance	NONS	Tonnage data confidential			CN(C)C1=CC=C(C=C1)C(\C(=O)NCCO)=C1\C(C)=NN(C1=O)C1=CC=C(C=C1)C(O)=O						CC\1=NN(C(=O)/C1=C(\C2=CC=C(C=C2)N(C)C)/C(=O)NCCO)C3=CC=C(C=C3)C(=O)O	FALSE		InChI=1S/C23H24N4O5/c1-14-19(22(30)27(25-14)18-10-6-16(7-11-18)23(31)32)20(21(29)24-12-13-28)15-4-8-17(9-5-15)26(2)3/h4-11,28H,12-13H2,1-3H3,(H,24,29)(H,31,32)/b20-19+		InChI=1S/C23H24N4O5/c1-14-19(22(30)27(25-14)18-10-6-16(7-11-18)23(31)32)20(21(29)24-12-13-28)15-4-8-17(9-5-15)26(2)3/h4-11,28H,12-13H2,1-3H3,(H,24,29)(H,31,32)/b20-19+		TRUE
9374	100.101.438	FRUCTOPYRIDINE						415-390-1	90145-47-4	yes	organic	mono-constituent substance	NONS	Tonnage data confidential			CC(C)(C)CC1=CN=CC=C1			DTXCID7030012	CC(C)(C)CC1=CN=CC=C1	TRUE	CC(C)(C)CC1=CN=CC=C1	TRUE		InChI=1S/C10H15N/c1-10(2,3)7-9-5-4-6-11-8-9/h4-6,8H,7H2,1-3H3	InChI=1S/C10H15N/c1-10(2,3)7-9-5-4-6-11-8-9/h4-6,8H,7H2,1-3H3	InChI=1S/C10H15N/c1-10(2,3)7-9-5-4-6-11-8-9/h4-6,8H,7H2,1-3H3	TRUE	TRUE	C(C(C)(C)C)C=1C=CC=NC1	InChI=1S/C10H15N/c1-10(2,3)7-9-5-4-6-11-8-9/h4-6,8H,7H2,1-3H3	TRUE
4333	100.101.440	4,4'-bis(2-methyl-2-(4-methylphenyl)-1-propionyl)diphenylsulfide						415-410-9		yes	organic	mono-constituent substance	NONS	Tonnage data confidential			CC1=CC=C(C=C1)S(=O)(=O)C(C)(C)C(=O)C1=CC=C(SC2=CC=C(C=C2)C(=O)C(C)(C)S(=O)(=O)C2=CC=C(C)C=C2)C=C1						CC1=CC=C(C=C1)S(=O)(=O)C(C)(C)C(=O)C2=CC=C(C=C2)SC3=CC=C(C=C3)C(=O)C(C)(C)S(=O)(=O)C4=CC=C(C=C4)C	OK		InChI=1S/C34H34O6S3/c1-23-7-19-29(20-8-23)42(37,38)33(3,4)31(35)25-11-15-27(16-12-25)41-28-17-13-26(14-18-28)32(36)34(5,6)43(39,40)30-21-9-24(2)10-22-30/h7-22H,1-6H3		InChI=1S/C34H34O6S3/c1-23-7-19-29(20-8-23)42(37,38)33(3,4)31(35)25-11-15-27(16-12-25)41-28-17-13-26(14-18-28)32(36)34(5,6)43(39,40)30-21-9-24(2)10-22-30/h7-22H,1-6H3		TRUE
4378	100.101.459	VULKANOX D-4020						415-600-1		Omitted undefined stereo in OpenBabel	organic	mono-constituent substance	NONS	Cease manufacture			CC(C)CC(C)NC1=CC=C(C=C1)N(C1=CC=CC=C1)C1=CC=C(NC(C)CC(C)C)C=C1						CC(C)CC(C)NC1=CC=C(C=C1)N(C2=CC=CC=C2)C3=CC=C(C=C3)NC(C)CC(C)C	FALSE		InChI=1S/C30H41N3/c1-22(2)20-24(5)31-26-12-16-29(17-13-26)33(28-10-8-7-9-11-28)30-18-14-27(15-19-30)32-25(6)21-23(3)4/h7-19,22-25,31-32H,20-21H2,1-6H3		InChI=1S/C30H41N3/c1-22(2)20-24(5)31-26-12-16-29(17-13-26)33(28-10-8-7-9-11-28)30-18-14-27(15-19-30)32-25(6)21-23(3)4/h7-19,22-25,31-32H,20-21H2,1-6H3		TRUE
4384	100.101.461	ETANAL						415-620-0		yes	organic	mono-constituent substance	NONS	Tonnage data confidential			CC(=O)OC1C[C@H]2C3=CC=CC=C3[C@]1(C=O)C1=CC=CC=C21									InChI=1S/C19H16O3/c1-12(21)22-18-10-15-13-6-2-4-8-16(13)19(18,11-20)17-9-5-3-7-14(15)17/h2-9,11,15,18H,10H2,1H3/t15-,18?,19+
4389	100.101.463	METHYLSECODION						415-640-1	899-79-6	missing cis/trans infomation	organic	mono-constituent substance	NONS	No longer valid			COC1=CC2=C(C=C1)C(CCC2)=CCC1(C)C(=O)CCC1=O			DTXCID90296511	COC1=CC2=C(C=C1)C(CCC2)=CCC1(C)C(=O)CCC1=O	TRUE	CC1(C(=O)CCC1=O)CC=C2CCCC3=C2C=CC(=C3)OC	FALSE		InChI=1S/C19H22O3/c1-19(17(20)8-9-18(19)21)11-10-13-4-3-5-14-12-15(22-2)6-7-16(13)14/h6-7,10,12H,3-5,8-9,11H2,1-2H3	InChI=1S/C19H22O3/c1-19(17(20)8-9-18(19)21)11-10-13-4-3-5-14-12-15(22-2)6-7-16(13)14/h6-7,10,12H,3-5,8-9,11H2,1-2H3	InChI=1S/C19H22O3/c1-19(17(20)8-9-18(19)21)11-10-13-4-3-5-14-12-15(22-2)6-7-16(13)14/h6-7,10,12H,3-5,8-9,11H2,1-2H3	TRUE	TRUE	C(CC1(C)C(=O)CCC1=O)=C2C=3C(=CC(OC)=CC3)CCC2	InChI=1S/C19H22O3/c1-19(17(20)8-9-18(19)21)11-10-13-4-3-5-14-12-15(22-2)6-7-16(13)14/h6-7,10,12H,3-5,8-9,11H2,1-2H3	TRUE
3085	100.101.482	F-BASE						415-830-2	67346-48-9	yes	organic	mono-constituent substance	NONS	Tonnage data confidential			[H][C@](C)(CC1=CC=C(OC)C=C1)NC[C@@]([H])(O)C1=CC(NC=O)=C(O)C=C1			DTXCID7065330	COC1=CC=C(C[C@H](C)NC[C@@H](O)C2=CC(NC=O)=C(O)C=C2)C=C1	FALSE	C[C@@H](CC1=CC=C(C=C1)OC)NC[C@H](C2=CC(=C(C=C2)O)NC=O)O	FALSE		InChI=1S/C19H24N2O4/c1-13(9-14-3-6-16(25-2)7-4-14)20-11-19(24)15-5-8-18(23)17(10-15)21-12-22/h3-8,10,12-13,19-20,23-24H,9,11H2,1-2H3,(H,21,22)/t13-,19+/m0/s1	InChI=1S/C19H24N2O4/c1-13(9-14-3-6-16(25-2)7-4-14)20-11-19(24)15-5-8-18(23)17(10-15)21-12-22/h3-8,10,12-13,19-20,23-24H,9,11H2,1-2H3,(H,21,22)/t13-,19+/m0/s1	InChI=1S/C19H24N2O4/c1-13(9-14-3-6-16(25-2)7-4-14)20-11-19(24)15-5-8-18(23)17(10-15)21-12-22/h3-8,10,12-13,19-20,23-24H,9,11H2,1-2H3,(H,21,22)/t13-,19+/m0/s1	TRUE	TRUE
3086	100.101.483	A mixture of: (3R)-[1S-(1α, 2α, 6 β-((2S)-2-methyl-1-oxo-butoxy)-8aγ)hexahydro-2,6-dimethyl-1-naphthalene]-3,5-dihydroxyheptanoic acid; inert biomass from aspergillus terreus						415-840-7	137767-34-1	Omitted undefined stereo in OpenBabel	organic	mono-constituent substance	NONS	Tonnage data confidential			CCC(C)C(=O)OC1CC(C)C=C2C=CC(C)C(CCC(O)CC(O)CC(O)=O)C12			DTXCID50816552	CCC(C)C(=O)OC1CC(C)C=C2C=CC(C)C(CCC(O)CC(O)CC(O)=O)C12	TRUE	CCC(C)C(=O)OC1CC(C=C2C1C(C(C=C2)C)CCC(CC(CC(=O)O)O)O)C	FALSE		InChI=1S/C24H38O6/c1-5-15(3)24(29)30-21-11-14(2)10-17-7-6-16(4)20(23(17)21)9-8-18(25)12-19(26)13-22(27)28/h6-7,10,14-16,18-21,23,25-26H,5,8-9,11-13H2,1-4H3,(H,27,28)	InChI=1S/C24H38O6/c1-5-15(3)24(29)30-21-11-14(2)10-17-7-6-16(4)20(23(17)21)9-8-18(25)12-19(26)13-22(27)28/h6-7,10,14-16,18-21,23,25-26H,5,8-9,11-13H2,1-4H3,(H,27,28)	InChI=1S/C24H38O6/c1-5-15(3)24(29)30-21-11-14(2)10-17-7-6-16(4)20(23(17)21)9-8-18(25)12-19(26)13-22(27)28/h6-7,10,14-16,18-21,23,25-26H,5,8-9,11-13H2,1-4H3,(H,27,28)		TRUE
9488	100.101.491	L-12416						415-920-1		yes	organic	mono-constituent substance	NONS	Tonnage data confidential			OCCNC(=O)C(F)(F)OC(F)(F)C(F)(F)OC(F)(F)C(F)(F)C(F)(F)C(F)(F)F									InChI=1S/C10H6F15NO4/c11-4(12,3(28)26-1-2-27)29-9(22,23)10(24,25)30-8(20,21)6(15,16)5(13,14)7(17,18)19/h27H,1-2H2,(H,26,28)
3485	100.101.510	DMPQA						416-130-1	60547-97-9	yes	organic	mono-constituent substance	NONS	Tonnage data confidential			COC1=CC2=NC(=NC(N)=C2C=C1OC)N1CCNCC1			DTXCID20131784	COC1=C(OC)C=C2C(N)=NC(=NC2=C1)N1CCNCC1	FALSE	COC1=C(C=C2C(=C1)C(=NC(=N2)N3CCNCC3)N)OC	FALSE		InChI=1S/C14H19N5O2/c1-20-11-7-9-10(8-12(11)21-2)17-14(18-13(9)15)19-5-3-16-4-6-19/h7-8,16H,3-6H2,1-2H3,(H2,15,17,18)	InChI=1S/C14H19N5O2/c1-20-11-7-9-10(8-12(11)21-2)17-14(18-13(9)15)19-5-3-16-4-6-19/h7-8,16H,3-6H2,1-2H3,(H2,15,17,18)	InChI=1S/C14H19N5O2/c1-20-11-7-9-10(8-12(11)21-2)17-14(18-13(9)15)19-5-3-16-4-6-19/h7-8,16H,3-6H2,1-2H3,(H2,15,17,18)	TRUE	TRUE	NC=1C2=C(N=C(N1)N3CCNCC3)C=C(OC)C(OC)=C2	InChI=1S/C14H19N5O2/c1-20-11-7-9-10(8-12(11)21-2)17-14(18-13(9)15)19-5-3-16-4-6-19/h7-8,16H,3-6H2,1-2H3,(H2,15,17,18)	TRUE
9759	100.101.513	ID-11						416-160-3	24331-83-7	yes	organic	mono-constituent substance	NONS	Tonnage data confidential			CCOC(=O)C(=CC1=CC(OC)=C(O)C=C1)C(=O)OCC			DTXCID70255101	CCOC(=O)C(=CC1=CC(OC)=C(O)C=C1)C(=O)OCC	TRUE	CCOC(=O)C(=CC1=CC(=C(C=C1)O)OC)C(=O)OCC	FALSE		InChI=1S/C15H18O6/c1-4-20-14(17)11(15(18)21-5-2)8-10-6-7-12(16)13(9-10)19-3/h6-9,16H,4-5H2,1-3H3	InChI=1S/C15H18O6/c1-4-20-14(17)11(15(18)21-5-2)8-10-6-7-12(16)13(9-10)19-3/h6-9,16H,4-5H2,1-3H3	InChI=1S/C15H18O6/c1-4-20-14(17)11(15(18)21-5-2)8-10-6-7-12(16)13(9-10)19-3/h6-9,16H,4-5H2,1-3H3	TRUE	TRUE
13963	100.101.517	BRL 47825						416-220-9	76311-95-0	yes	organic	mono-constituent substance	NONS	Tonnage data confidential			CNC(=O)CC(=O)OC						CNC(=O)CC(=O)OC	TRUE		InChI=1S/C5H9NO3/c1-6-4(7)3-5(8)9-2/h3H2,1-2H3,(H,6,7)		InChI=1S/C5H9NO3/c1-6-4(7)3-5(8)9-2/h3H2,1-2H3,(H,6,7)		TRUE
9792	100.101.524	PM 14978						416-290-0		yes	organic	mono-constituent substance	NONS	Tonnage data confidential			CCN(CCO)S(=O)(=O)C1=CC(CC)=C(NC2=CC=C(NC3=C(CC)C=CC(=C3CC)S(=O)(=O)N(CC)CCO)C3=C2C(=O)C2=C(C=CC=C2)C3=O)C(CC)=C1									InChI=1S/C42H52N4O8S2/c1-7-27-17-20-36(56(53,54)46(12-6)22-24-48)31(10-4)40(27)44-35-19-18-34(37-38(35)42(50)33-16-14-13-15-32(33)41(37)49)43-39-28(8-2)25-30(26-29(39)9-3)55(51,52)45(11-5)21-23-47/h13-20,25-26,43-44,47-48H,7-12,21-24H2,1-6H3
9794	100.101.525	PM14943						416-300-3		yes	organic	mono-constituent substance	NONS	Tonnage data confidential			CCN(CCO)S(=O)(=O)C1=CC(NC2=CC=C(NC3=CC(=CC=C3OC)S(=O)(=O)N(CC)CCO)C3=C2C(=O)C2=C(C=CC=C2)C3=O)=C(OC)C=C1									InChI=1S/C36H40N4O10S2/c1-5-39(17-19-41)51(45,46)23-11-15-31(49-3)29(21-23)37-27-13-14-28(34-33(27)35(43)25-9-7-8-10-26(25)36(34)44)38-30-22-24(12-16-32(30)50-4)52(47,48)40(6-2)18-20-42/h7-16,21-22,37-38,41-42H,5-6,17-20H2,1-4H3
3526	100.101.527	AF-142						416-330-7	33901-81-4	yes	organic	mono-constituent substance	NONS	Tonnage data confidential			CCN(CC)C1=NC(NO)=NC(NO)=N1			DTXCID30498496	CCN(CC)C1=NC(NO)=NC(NO)=N1	TRUE	CCN(CC)C1=NC(=NC(=N1)NO)NO	FALSE		InChI=1S/C7H14N6O2/c1-3-13(4-2)7-9-5(11-14)8-6(10-7)12-15/h14-15H,3-4H2,1-2H3,(H2,8,9,10,11,12)	InChI=1S/C7H14N6O2/c1-3-13(4-2)7-9-5(11-14)8-6(10-7)12-15/h14-15H,3-4H2,1-2H3,(H2,8,9,10,11,12)	InChI=1S/C7H14N6O2/c1-3-13(4-2)7-9-5(11-14)8-6(10-7)12-15/h14-15H,3-4H2,1-2H3,(H2,8,9,10,11,12)	TRUE	TRUE
3531	100.101.528	NITRO-XYLIDINE						416-350-6	16947-63-0	yes	organic	mono-constituent substance	NONS	Tonnage data confidential			CC1=CC(=CC(C)=C1N)N(=O)=O			DTXCID2091207	CC1=CC(=CC(C)=C1N)[N+]([O-])=O	FALSE	CC1=CC(=CC(=C1N)C)[N+](=O)[O-]	FALSE		InChI=1S/C8H10N2O2/c1-5-3-7(10(11)12)4-6(2)8(5)9/h3-4H,9H2,1-2H3	InChI=1S/C8H10N2O2/c1-5-3-7(10(11)12)4-6(2)8(5)9/h3-4H,9H2,1-2H3	InChI=1S/C8H10N2O2/c1-5-3-7(10(11)12)4-6(2)8(5)9/h3-4H,9H2,1-2H3	TRUE	TRUE	N(=O)(=O)C1=CC(C)=C(N)C(C)=C1	InChI=1S/C8H10N2O2/c1-5-3-7(10(11)12)4-6(2)8(5)9/h3-4H,9H2,1-2H3	TRUE
9817	100.101.533	UC-704						416-400-7		yes	organic	mono-constituent substance	NONS	Cease manufacture			CCCCCCCCCCCCCCOC1=C(NC(=O)C2=CC(OC(=O)N(CN3N=NN(CCCC)C3=S)CC(=O)OC)=C3C=CC=CC3=C2O)C=CC=C1						CCCCCCCCCCCCCCOC1=CC=CC=C1NC(=O)C2=C(C3=CC=CC=C3C(=C2)OC(=O)N(CC(=O)OC)CN4C(=S)N(N=N4)CCCC)O	FALSE		InChI=1S/C41H56N6O7S/c1-4-6-8-9-10-11-12-13-14-15-16-21-27-53-35-25-20-19-24-34(35)42-39(50)33-28-36(31-22-17-18-23-32(31)38(33)49)54-41(51)45(29-37(48)52-3)30-47-40(55)46(43-44-47)26-7-5-2/h17-20,22-25,28,49H,4-16,21,26-27,29-30H2,1-3H3,(H,42,50)		InChI=1S/C41H56N6O7S/c1-4-6-8-9-10-11-12-13-14-15-16-21-27-53-35-25-20-19-24-34(35)42-39(50)33-28-36(31-22-17-18-23-32(31)38(33)49)54-41(51)45(29-37(48)52-3)30-47-40(55)46(43-44-47)26-7-5-2/h17-20,22-25,28,49H,4-16,21,26-27,29-30H2,1-3H3,(H,42,50)		TRUE
3520	100.101.535	2-[[4-(4-aminophenyl)diazenyl-3-methyl-phenyl]-(2-hydroxyethyl)amino]ethanol						416-420-6	104226-21-3	missing cis/trans infomation	organic	mono-constituent substance	NONS	Tonnage data confidential			CC1=C(C=CC(=C1)N(CCO)CCO)N=NC1=CC=C(N)C=C1			DTXCID20910814	CC1=CC(=CC=C1\N=N\C1=CC=C(N)C=C1)N(CCO)CCO	FALSE	CC1=C(C=CC(=C1)N(CCO)CCO)N=NC2=CC=C(C=C2)N	FALSE		InChI=1S/C17H22N4O2/c1-13-12-16(21(8-10-22)9-11-23)6-7-17(13)20-19-15-4-2-14(18)3-5-15/h2-7,12,22-23H,8-11,18H2,1H3	InChI=1S/C17H22N4O2/c1-13-12-16(21(8-10-22)9-11-23)6-7-17(13)20-19-15-4-2-14(18)3-5-15/h2-7,12,22-23H,8-11,18H2,1H3/b20-19+	InChI=1S/C17H22N4O2/c1-13-12-16(21(8-10-22)9-11-23)6-7-17(13)20-19-15-4-2-14(18)3-5-15/h2-7,12,22-23H,8-11,18H2,1H3	FALSE	TRUE	N(CCO)(CCO)C1=CC(C)=C(N=NC2=CC=C(N)C=C2)C=C1	InChI=1S/C17H22N4O2/c1-13-12-16(21(8-10-22)9-11-23)6-7-17(13)20-19-15-4-2-14(18)3-5-15/h2-7,12,22-23H,8-11,18H2,1H3	TRUE
3572	100.101.541	1265F						416-480-3		missing cis/trans infomation	organic	mono-constituent substance	NONS	Tonnage data confidential			CCCCCCCCCCCCCC(=O)NC1=CC=C(Cl)C(NC2=NN(C(=O)C2=NC2=C(C)C=C(C=C2)N(CC)CCNS(C)(=O)=O)C2=C(Cl)C=C(Cl)C=C2Cl)=C1						CCCCCCCCCCCCCC(=O)NC1=CC(=C(C=C1)Cl)NC2=NN(C(=O)C2=NC3=C(C=C(C=C3)N(CC)CCNS(=O)(=O)C)C)C4=C(C=C(C=C4Cl)Cl)Cl	FALSE		InChI=1S/C41H53Cl4N7O4S/c1-5-7-8-9-10-11-12-13-14-15-16-17-37(53)47-30-18-20-32(43)36(27-30)49-40-38(41(54)52(50-40)39-33(44)25-29(42)26-34(39)45)48-35-21-19-31(24-28(35)3)51(6-2)23-22-46-57(4,55)56/h18-21,24-27,46H,5-17,22-23H2,1-4H3,(H,47,53)(H,49,50)		InChI=1S/C41H53Cl4N7O4S/c1-5-7-8-9-10-11-12-13-14-15-16-17-37(53)47-30-18-20-32(43)36(27-30)49-40-38(41(54)52(50-40)39-33(44)25-29(42)26-34(39)45)48-35-21-19-31(24-28(35)3)51(6-2)23-22-46-57(4,55)56/h18-21,24-27,46H,5-17,22-23H2,1-4H3,(H,47,53)(H,49,50)		TRUE
9881	100.101.548	LMB 6020						416-570-2	96159-17-0	yes	organic	mono-constituent substance	NONS	Tonnage data confidential			CN1C(=O)C2=C(N(C)C(=O)C2=C1C1=CC=CC=C1)C1=CC=CC=C1			DTXCID70500744	CN1C(=O)C2=C(N(C)C(=O)C2=C1C1=CC=CC=C1)C1=CC=CC=C1	TRUE	CN1C(=C2C(=C(N(C2=O)C)C3=CC=CC=C3)C1=O)C4=CC=CC=C4	FALSE		InChI=1S/C20H16N2O2/c1-21-17(13-9-5-3-6-10-13)15-16(19(21)23)18(22(2)20(15)24)14-11-7-4-8-12-14/h3-12H,1-2H3	InChI=1S/C20H16N2O2/c1-21-17(13-9-5-3-6-10-13)15-16(19(21)23)18(22(2)20(15)24)14-11-7-4-8-12-14/h3-12H,1-2H3	InChI=1S/C20H16N2O2/c1-21-17(13-9-5-3-6-10-13)15-16(19(21)23)18(22(2)20(15)24)14-11-7-4-8-12-14/h3-12H,1-2H3	TRUE	TRUE
13359	100.101.551	1,1'-(methylenedi-4,1-phenylene)bis(3-butylurea)						416-600-4	77703-56-1	yes	organic	mono-constituent substance	FULL	≥ 1000 tonnes			CCCCNC(=O)NC1=CC=C(CC2=CC=C(NC(=O)NCCCC)C=C2)C=C1						CCCCNC(=O)NC1=CC=C(C=C1)CC2=CC=C(C=C2)NC(=O)NCCCC	OK		InChI=1S/C23H32N4O2/c1-3-5-15-24-22(28)26-20-11-7-18(8-12-20)17-19-9-13-21(14-10-19)27-23(29)25-16-6-4-2/h7-14H,3-6,15-17H2,1-2H3,(H2,24,26,28)(H2,25,27,29)		InChI=1S/C23H32N4O2/c1-3-5-15-24-22(28)26-20-11-7-18(8-12-20)17-19-9-13-21(14-10-19)27-23(29)25-16-6-4-2/h7-14H,3-6,15-17H2,1-2H3,(H2,24,26,28)(H2,25,27,29)		TRUE
3596	100.101.552	IMEXIXE FW						416-610-9	73388-54-2	yes	organic	mono-constituent substance	NONS	Tonnage data confidential			OCCNC1=C(O)C=C(C=C1)N(=O)=O			DTXCID10146120	OCCNC1=C(O)C=C(C=C1)[N+]([O-])=O	FALSE	C1=CC(=C(C=C1[N+](=O)[O-])O)NCCO	FALSE		InChI=1S/C8H10N2O4/c11-4-3-9-7-2-1-6(10(13)14)5-8(7)12/h1-2,5,9,11-12H,3-4H2	InChI=1S/C8H10N2O4/c11-4-3-9-7-2-1-6(10(13)14)5-8(7)12/h1-2,5,9,11-12H,3-4H2	InChI=1S/C8H10N2O4/c11-4-3-9-7-2-1-6(10(13)14)5-8(7)12/h1-2,5,9,11-12H,3-4H2	TRUE	TRUE
14041	100.101.556	N-[3-(5-thioxo-2,5-dihydro-1H-tetrazol-1-yl)phenyl]benzamide						416-670-6	63967-10-2	yes	organic	mono-constituent substance	NONS	Tonnage data confidential			O=C(NC1=CC(=CC=C1)N1N=NNC1=S)C1=CC=CC=C1			DTXCID40523228	O=C(NC1=CC(=CC=C1)N1NN=NC1=S)C1=CC=CC=C1	FALSE	C1=CC=C(C=C1)C(=O)NC2=CC(=CC=C2)N3C(=S)N=NN3	FALSE		InChI=1S/C14H11N5OS/c20-13(10-5-2-1-3-6-10)15-11-7-4-8-12(9-11)19-14(21)16-17-18-19/h1-9H,(H,15,20)(H,16,18,21)	InChI=1S/C14H11N5OS/c20-13(10-5-2-1-3-6-10)15-11-7-4-8-12(9-11)19-14(21)16-17-18-19/h1-9H,(H,15,20)(H,16,18,21)	InChI=1S/C14H11N5OS/c20-13(10-5-2-1-3-6-10)15-11-7-4-8-12(9-11)19-14(21)16-17-18-19/h1-9H,(H,15,20)(H,16,18,21)	TRUE	TRUE
3614	100.101.558	PRIOLUBE 1944						416-690-5		Omitted undefined stereo in OpenBabel	organic	mono-constituent substance	NONS	Tonnage data confidential			CCCCCCCOCC(COCCCCCCC(C)C)(COCCCC(C)CC)COCC(CC)CCCC									InChI=1S/C36H74O4/c1-8-12-14-16-19-25-37-29-36(31-39-27-21-23-34(7)10-3,32-40-28-35(11-4)24-13-9-2)30-38-26-20-17-15-18-22-33(5)6/h33-35H,8-32H2,1-7H3
3619	100.101.559	PRIOLUBE 1945						416-700-8		Omitted undefined stereo in OpenBabel	organic	mono-constituent substance	NONS	Tonnage data confidential			CCCCCCCOCC(COCCCCCCC(C)C)(COCCCC(C)CC)COCC(CC)CCCC									InChI=1S/C36H74O4/c1-8-12-14-16-19-25-37-29-36(31-39-27-21-23-34(7)10-3,32-40-28-35(11-4)24-13-9-2)30-38-26-20-17-15-18-22-33(5)6/h33-35H,8-32H2,1-7H3
9923	100.101.565	FR-1808						416-760-5		Omitted undefined stereo in OpenBabel	organic	mono-constituent substance	NONS	Tonnage data confidential			CC1(C)CC(C)(C2=C1C(Br)=C(Br)C(Br)=C2)C1=C(Br)C(Br)=C(Br)C(Br)=C1Br									InChI=1S/C18H12Br8/c1-17(2)5-18(3,6-4-7(19)10(20)11(21)8(6)17)9-12(22)14(24)16(26)15(25)13(9)23/h4H,5H2,1-3H3
3659	100.101.571	PMML2						416-820-0		Omitted undefined stereo in OpenBabel	organic	mono-constituent substance	NONS	No longer valid			CCCCCCCCCCCCOC(=O)C(C)(CC(C)(C(CCCC)CCCCCCC)C(=O)OCCOP([O-])(=O)OCC[N+](C)(C)C)CC(C)(C(CCCCC)CCCCCCC)C(=O)OCCCCCCCCCCCC									InChI=1S/C67H132NO10P/c1-13-19-25-29-31-33-35-37-41-46-53-74-62(69)65(7,58-66(8,60(48-24-18-6)50-44-39-27-21-15-3)64(71)76-56-57-78-79(72,73)77-55-52-68(10,11)12)59-67(9,61(49-43-23-17-5)51-45-40-28-22-16-4)63(70)75-54-47-42-38-36-34-32-30-26-20-14-2/h60-61H,13-59H2,1-12H3
3676	100.101.576	BTRT						416-870-3		yes	organic	mono-constituent substance	NONS	Tonnage data confidential			CN1C([S-])=N[N+](C)=C1CCC=C						CN1C(=[N+](C(=N1)[S-])C)CCC=C	FALSE		InChI=1S/C8H13N3S/c1-4-5-6-7-10(2)8(12)9-11(7)3/h4H,1,5-6H2,2-3H3		InChI=1S/C8H13N3S/c1-4-5-6-7-10(2)8(12)9-11(7)3/h4H,1,5-6H2,2-3H3		TRUE
3682	100.101.579	RS-21904-000						416-910-1		yes	organic	mono-constituent substance	NONS	Tonnage data confidential			NC1=NC2=C(N=CN2COC(COCC2=CC=CC=C2)COCC2=CC=CC=C2)C(=O)N1						C1=CC=C(C=C1)COCC(COCC2=CC=CC=C2)OCN3C=NC4=C3NC(=NC4=O)N	FALSE		InChI=1S/C23H25N5O4/c24-23-26-21-20(22(29)27-23)25-15-28(21)16-32-19(13-30-11-17-7-3-1-4-8-17)14-31-12-18-9-5-2-6-10-18/h1-10,15,19H,11-14,16H2,(H3,24,26,27,29)		InChI=1S/C23H25N5O4/c24-23-26-21-20(22(29)27-23)25-15-28(21)16-32-19(13-30-11-17-7-3-1-4-8-17)14-31-12-18-9-5-2-6-10-18/h1-10,15,19H,11-14,16H2,(H3,24,26,27,29)		TRUE
9962	100.101.584	CNN-2						416-960-2		Omitted undefined stereo in OpenBabel	organic	mono-constituent substance	NONS	Tonnage data confidential			COC1=CC=CC2=C1C=CC1=C2OC2(C=C1)C1CCCC2CCC1						COC1=CC=CC2=C1C=CC3=C2OC4(C=C3)C5CCCC4CCC5	FALSE		InChI=1S/C22H24O2/c1-23-20-10-4-9-19-18(20)12-11-15-13-14-22(24-21(15)19)16-5-2-6-17(22)8-3-7-16/h4,9-14,16-17H,2-3,5-8H2,1H3		InChI=1S/C22H24O2/c1-23-20-10-4-9-19-18(20)12-11-15-13-14-22(24-21(15)19)16-5-2-6-17(22)8-3-7-16/h4,9-14,16-17H,2-3,5-8H2,1H3		TRUE
8377	100.101.602	GV 153210 X						417-150-1	153435-96-2	yes	organic	mono-constituent substance	NONS	Tonnage data confidential			CCOC(=O)C1=C(C=O)C2=C(N1)C=C(Cl)C=C2Cl			DTXCID10334525	CCOC(=O)C1=C(C=O)C2=C(N1)C=C(Cl)C=C2Cl	TRUE	CCOC(=O)C1=C(C2=C(N1)C=C(C=C2Cl)Cl)C=O	FALSE		InChI=1S/C12H9Cl2NO3/c1-2-18-12(17)11-7(5-16)10-8(14)3-6(13)4-9(10)15-11/h3-5,15H,2H2,1H3	InChI=1S/C12H9Cl2NO3/c1-2-18-12(17)11-7(5-16)10-8(14)3-6(13)4-9(10)15-11/h3-5,15H,2H2,1H3	InChI=1S/C12H9Cl2NO3/c1-2-18-12(17)11-7(5-16)10-8(14)3-6(13)4-9(10)15-11/h3-5,15H,2H2,1H3	TRUE	TRUE
2274	100.101.603	FRESCOLAT MGC						417-160-6		Omitted undefined stereo in OpenBabel	organic	mono-constituent substance	NONS	Tonnage data confidential			CC(C)C1CCC(C)CC1OC(=O)OCCO								removed CAS RN but did not add correct one	InChI=1S/C13H24O4/c1-9(2)11-5-4-10(3)8-12(11)17-13(15)16-7-6-14/h9-12,14H,4-8H2,1-3H3
2743	100.101.606	SLM 50524						417-190-1		yes	organic	mono-constituent substance	NONS	No longer valid			CCCCCCCCCCCCCCCCCC[Si](C)(C)O[Si](C)(C)CCCCCCCCCCCCCCCCCC						CCCCCCCCCCCCCCCCCC[Si](C)(C)O[Si](C)(C)CCCCCCCCCCCCCCCCCC	TRUE		InChI=1S/C40H86OSi2/c1-7-9-11-13-15-17-19-21-23-25-27-29-31-33-35-37-39-42(3,4)41-43(5,6)40-38-36-34-32-30-28-26-24-22-20-18-16-14-12-10-8-2/h7-40H2,1-6H3		InChI=1S/C40H86OSi2/c1-7-9-11-13-15-17-19-21-23-25-27-29-31-33-35-37-39-42(3,4)41-43(5,6)40-38-36-34-32-30-28-26-24-22-20-18-16-14-12-10-8-2/h7-40H2,1-6H3		TRUE
2736	100.101.614	FLUTEC PP4						417-270-4	374-76-5	Omitted undefined stereo in OpenBabel	organic	mono-constituent substance	NONS	No longer valid			FC(F)(F)C1(F)C(F)(F)C(F)(C(F)(F)F)C(F)(F)C(F)(C(F)(F)F)C1(F)F			DTXCID20331065	FC(F)(F)C1(F)C(F)(F)C(F)(C(F)(F)F)C(F)(F)C(F)(C(F)(F)F)C1(F)F	TRUE	C1(C(C(C(C(C1(F)F)(C(F)(F)F)F)(F)F)(C(F)(F)F)F)(F)F)(C(F)(F)F)F	FALSE		InChI=1S/C9F18/c10-1(7(19,20)21)4(13,14)2(11,8(22,23)24)6(17,18)3(12,5(1,15)16)9(25,26)27	InChI=1S/C9F18/c10-1(7(19,20)21)4(13,14)2(11,8(22,23)24)6(17,18)3(12,5(1,15)16)9(25,26)27	InChI=1S/C9F18/c10-1(7(19,20)21)4(13,14)2(11,8(22,23)24)6(17,18)3(12,5(1,15)16)9(25,26)27	TRUE	TRUE
2761	100.101.625	L 708,350						417-380-2	149490-60-8	yes	organic	mono-constituent substance	NONS	Tonnage data confidential			CCCCS(=O)(=O)N[C@@H](CC1=CC=C(O)C=C1)C(O)=O			DTXCID40401037	CCCCS(=O)(=O)N[C@@H](CC1=CC=C(O)C=C1)C(O)=O	TRUE	CCCCS(=O)(=O)N[C@@H](CC1=CC=C(C=C1)O)C(=O)O	FALSE		InChI=1S/C13H19NO5S/c1-2-3-8-20(18,19)14-12(13(16)17)9-10-4-6-11(15)7-5-10/h4-7,12,14-15H,2-3,8-9H2,1H3,(H,16,17)/t12-/m0/s1	InChI=1S/C13H19NO5S/c1-2-3-8-20(18,19)14-12(13(16)17)9-10-4-6-11(15)7-5-10/h4-7,12,14-15H,2-3,8-9H2,1H3,(H,16,17)/t12-/m0/s1	InChI=1S/C13H19NO5S/c1-2-3-8-20(18,19)14-12(13(16)17)9-10-4-6-11(15)7-5-10/h4-7,12,14-15H,2-3,8-9H2,1H3,(H,16,17)/t12-/m0/s1	TRUE	TRUE
2817	100.101.644	ABZ						417-570-5	13060-24-7	yes	organic	mono-constituent substance	NONS	Tonnage data confidential			CCCCCCCCC1=NC2=C(N1)C=CC=C2			DTXCID20315901	CCCCCCCCC1=NC2=CC=CC=C2N1	FALSE	CCCCCCCCC1=NC2=CC=CC=C2N1	FALSE		InChI=1S/C15H22N2/c1-2-3-4-5-6-7-12-15-16-13-10-8-9-11-14(13)17-15/h8-11H,2-7,12H2,1H3,(H,16,17)	InChI=1S/C15H22N2/c1-2-3-4-5-6-7-12-15-16-13-10-8-9-11-14(13)17-15/h8-11H,2-7,12H2,1H3,(H,16,17)	InChI=1S/C15H22N2/c1-2-3-4-5-6-7-12-15-16-13-10-8-9-11-14(13)17-15/h8-11H,2-7,12H2,1H3,(H,16,17)	TRUE	TRUE
9294	100.101.649	RED CLA 322						417-630-0		missing cis/trans infomation	organic	mono-constituent substance	NONS	Tonnage data confidential			COC(=O)C(C)NC1=CC(NC(C)=O)=C(C=C1Cl)N=NC1=C(C=C(C=C1)N(=O)=O)C#N						CC(C(=O)OC)NC1=C(C=C(C(=C1)NC(=O)C)N=NC2=C(C=C(C=C2)[N+](=O)[O-])C#N)Cl	FALSE		InChI=1S/C19H17ClN6O5/c1-10(19(28)31-3)22-16-8-17(23-11(2)27)18(7-14(16)20)25-24-15-5-4-13(26(29)30)6-12(15)9-21/h4-8,10,22H,1-3H3,(H,23,27)		InChI=1S/C19H17ClN6O5/c1-10(19(28)31-3)22-16-8-17(23-11(2)27)18(7-14(16)20)25-24-15-5-4-13(26(29)30)6-12(15)9-21/h4-8,10,22H,1-3H3,(H,23,27)		TRUE
2893	100.101.660	A 11						417-740-9		yes	organic	mono-constituent substance	NONS	Tonnage data confidential			CC(C)CCCCCCCCCCOC1=CC=C(C=C1)N1CCS(=O)(=O)CC1						CC(C)CCCCCCCCCCOC1=CC=C(C=C1)N2CCS(=O)(=O)CC2	FALSE		InChI=1S/C23H39NO3S/c1-21(2)11-9-7-5-3-4-6-8-10-18-27-23-14-12-22(13-15-23)24-16-19-28(25,26)20-17-24/h12-15,21H,3-11,16-20H2,1-2H3		InChI=1S/C23H39NO3S/c1-21(2)11-9-7-5-3-4-6-8-10-18-27-23-14-12-22(13-15-23)24-16-19-28(25,26)20-17-24/h12-15,21H,3-11,16-20H2,1-2H3		TRUE
2896	100.101.661	BB-94 INTERMEDIATE 5 (R)						417-750-3	155947-71-0	yes	organic	mono-constituent substance	NONS	Tonnage data confidential			[H][C@@](CC(C)C)(C(C(=O)OCC1=CC=CC=C1)C(=O)OCC1=CC=CC=C1)C(O)=O						CC(C)C[C@H](C(C(=O)OCC1=CC=CC=C1)C(=O)OCC2=CC=CC=C2)C(=O)O	FALSE		InChI=1S/C23H26O6/c1-16(2)13-19(21(24)25)20(22(26)28-14-17-9-5-3-6-10-17)23(27)29-15-18-11-7-4-8-12-18/h3-12,16,19-20H,13-15H2,1-2H3,(H,24,25)/t19-/m1/s1		InChI=1S/C23H26O6/c1-16(2)13-19(21(24)25)20(22(26)28-14-17-9-5-3-6-10-17)23(27)29-15-18-11-7-4-8-12-18/h3-12,16,19-20H,13-15H2,1-2H3,(H,24,25)/t19-/m1/s1		TRUE
9338	100.101.666	SKF 109077						417-820-3	152146-59-3	yes	organic	mono-constituent substance	NONS	Tonnage data confidential			CCCCC1=NC=C(C=O)N1CC1=CC=C(C=C1)C(O)=O			DTXCID70382845	CCCCC1=NC=C(C=O)N1CC1=CC=C(C=C1)C(O)=O	TRUE	CCCCC1=NC=C(N1CC2=CC=C(C=C2)C(=O)O)C=O	FALSE		InChI=1S/C16H18N2O3/c1-2-3-4-15-17-9-14(11-19)18(15)10-12-5-7-13(8-6-12)16(20)21/h5-9,11H,2-4,10H2,1H3,(H,20,21)	InChI=1S/C16H18N2O3/c1-2-3-4-15-17-9-14(11-19)18(15)10-12-5-7-13(8-6-12)16(20)21/h5-9,11H,2-4,10H2,1H3,(H,20,21)	InChI=1S/C16H18N2O3/c1-2-3-4-15-17-9-14(11-19)18(15)10-12-5-7-13(8-6-12)16(20)21/h5-9,11H,2-4,10H2,1H3,(H,20,21)	TRUE	TRUE
2949	100.101.680	2-alkoyloxyethyl hydrogen maleate, where alkoyl represents (by weight) 70 to 85% unsaturated octadecoyl, 0.5 to 10% saturated octadecoyl, and 2 to 18% saturated hexadecoyl						417-960-5		missing cis/trans infomation	organic	mono-constituent substance	NONS	Tonnage data confidential			CCCCCCCCCCCCCCCCCCCCC(=O)OCCOC(=O)C=CC=O									InChI=1S/C27H48O5/c1-2-3-4-5-6-7-8-9-10-11-12-13-14-15-16-17-18-19-21-26(29)31-24-25-32-27(30)22-20-23-28/h20,22-23H,2-19,21,24-25H2,1H3
2972	100.101.688	VESTOWAX DSA 7						418-040-6		yes	organic	mono-constituent substance	NONS	Tonnage data confidential			CCCCCCCCC(=O)NCCCCCCCCCCCCNC(=O)CCCCCCCC									InChI=1S/C30H60N2O2/c1-3-5-7-9-17-21-25-29(33)31-27-23-19-15-13-11-12-14-16-20-24-28-32-30(34)26-22-18-10-8-6-4-2/h3-28H2,1-2H3,(H,31,33)(H,32,34)
3011	100.101.698	PHOTOSOL 7-120						418-150-4		Omitted undefined stereo in OpenBabel	organic	mono-constituent substance	NONS	Tonnage data confidential			COC1=CC=C(C=C1)C1(OC2=C3C=C(C)C=CC3=C3C4=C(C=C(C)C=C4)C(O)(C(C)C)C3=C2C=C1)C1=CC=C(OC)C=C1						CC1=CC2=C(C=C1)C3=C(C4=C2OC(C=C4)(C5=CC=C(C=C5)OC)C6=CC=C(C=C6)OC)C(C7=C3C=CC(=C7)C)(C(C)C)O	FALSE		InChI=1S/C39H36O4/c1-23(2)39(40)34-22-25(4)8-18-31(34)35-30-17-7-24(3)21-33(30)37-32(36(35)39)19-20-38(43-37,26-9-13-28(41-5)14-10-26)27-11-15-29(42-6)16-12-27/h7-23,40H,1-6H3		InChI=1S/C39H36O4/c1-23(2)39(40)34-22-25(4)8-18-31(34)35-30-17-7-24(3)21-33(30)37-32(36(35)39)19-20-38(43-37,26-9-13-28(41-5)14-10-26)27-11-15-29(42-6)16-12-27/h7-23,40H,1-6H3		TRUE
3013	100.101.699	PHOTOSOL 7-176						418-160-9		yes	organic	mono-constituent substance	NONS	Tonnage data confidential			CCOC(=O)COC(=O)C1=C2C=CC(OC2=C2C=CC(C)=CC2=C1)(C1=CC=CC=C1)C1=CC=CC=C1						CCOC(=O)COC(=O)C1=C2C=CC(OC2=C3C=CC(=CC3=C1)C)(C4=CC=CC=C4)C5=CC=CC=C5	FALSE		InChI=1S/C31H26O5/c1-3-34-28(32)20-35-30(33)27-19-22-18-21(2)14-15-25(22)29-26(27)16-17-31(36-29,23-10-6-4-7-11-23)24-12-8-5-9-13-24/h4-19H,3,20H2,1-2H3		InChI=1S/C31H26O5/c1-3-34-28(32)20-35-30(33)27-19-22-18-21(2)14-15-25(22)29-26(27)16-17-31(36-29,23-10-6-4-7-11-23)24-12-8-5-9-13-24/h4-19H,3,20H2,1-2H3		TRUE
4827	100.101.712	DCOX						418-300-9	18671-97-1	yes	organic	mono-constituent substance	NONS	Tonnage data confidential			ClC1=CC2=NC=C(Cl)N=C2C=C1			DTXCID3035898	ClC1=CC2=NC=C(Cl)N=C2C=C1	TRUE	C1=CC2=NC(=CN=C2C=C1Cl)Cl	FALSE		InChI=1S/C8H4Cl2N2/c9-5-1-2-6-7(3-5)11-4-8(10)12-6/h1-4H	InChI=1S/C8H4Cl2N2/c9-5-1-2-6-7(3-5)11-4-8(10)12-6/h1-4H	InChI=1S/C8H4Cl2N2/c9-5-1-2-6-7(3-5)11-4-8(10)12-6/h1-4H	TRUE	TRUE	ClC1=CC2=C(N=C(Cl)C=N2)C=C1	InChI=1S/C8H4Cl2N2/c9-5-1-2-6-7(3-5)11-4-8(10)12-6/h1-4H	TRUE
9703	100.101.721	A 34						418-390-1		yes	organic	mono-constituent substance	NONS	Tonnage data confidential			CCOC(=O)OC1=CC(=C(O)C=C1)N(=O)=O						CCOC(=O)OC1=CC(=C(C=C1)O)[N+](=O)[O-]	FALSE		InChI=1S/C9H9NO6/c1-2-15-9(12)16-6-3-4-8(11)7(5-6)10(13)14/h3-5,11H,2H2,1H3		InChI=1S/C9H9NO6/c1-2-15-9(12)16-6-3-4-8(11)7(5-6)10(13)14/h3-5,11H,2H2,1H3		TRUE
4883	100.101.726	N 136						418-450-5	33942-96-0	yes	organic	mono-constituent substance	NONS	Tonnage data confidential			CCCCCCCCCCCCOC(=O)C1=CC=C(Cl)C(NC(=O)CC(=O)C2=CC=C(OC)C=C2)=C1			DTXCID4038766	CCCCCCCCCCCCOC(=O)C1=CC(NC(=O)CC(=O)C2=CC=C(OC)C=C2)=C(Cl)C=C1	FALSE	CCCCCCCCCCCCOC(=O)C1=CC(=C(C=C1)Cl)NC(=O)CC(=O)C2=CC=C(C=C2)OC	FALSE		InChI=1S/C29H38ClNO5/c1-3-4-5-6-7-8-9-10-11-12-19-36-29(34)23-15-18-25(30)26(20-23)31-28(33)21-27(32)22-13-16-24(35-2)17-14-22/h13-18,20H,3-12,19,21H2,1-2H3,(H,31,33)	InChI=1S/C29H38ClNO5/c1-3-4-5-6-7-8-9-10-11-12-19-36-29(34)23-15-18-25(30)26(20-23)31-28(33)21-27(32)22-13-16-24(35-2)17-14-22/h13-18,20H,3-12,19,21H2,1-2H3,(H,31,33)	InChI=1S/C29H38ClNO5/c1-3-4-5-6-7-8-9-10-11-12-19-36-29(34)23-15-18-25(30)26(20-23)31-28(33)21-27(32)22-13-16-24(35-2)17-14-22/h13-18,20H,3-12,19,21H2,1-2H3,(H,31,33)	TRUE	TRUE
4915	100.101.739	2-O-ethyl 6-O-tetradecanoyl-D-glucopyranoside						418-580-2		Omitted undefined stereo in OpenBabel	organic	mono-constituent substance	NONS	Tonnage data confidential			CCCCCCCCCCCCCC(=O)OCC1CC(CO)C(O)C(O)C1O									InChI=1S/C22H42O6/c1-2-3-4-5-6-7-8-9-10-11-12-13-19(24)28-16-18-14-17(15-23)20(25)22(27)21(18)26/h17-18,20-23,25-27H,2-16H2,1H3
4900	100.101.743	Ethyl 6-O-octadecenoyl-D-glucopyranoside						418-620-9		Omitted undefined stereo in OpenBabel	organic	mono-constituent substance	NONS	Tonnage data confidential			CCCCCCCC\C=C\CCCCCCCC(=O)OCC1OC(CCO)C(O)C(O)C1O									InChI=1S/C26H48O7/c1-2-3-4-5-6-7-8-9-10-11-12-13-14-15-16-17-23(28)32-20-22-25(30)26(31)24(29)21(33-22)18-19-27/h9-10,21-22,24-27,29-31H,2-8,11-20H2,1H3/b10-9+
9772	100.101.749	AZODICARBOXYLIC DIMORPHOLIDE						418-690-0		missing cis/trans infomation	organic	mono-constituent substance	NONS	Tonnage data confidential			O=C(N=NC(=O)N1CCOCC1)N1CCOCC1						C1COCCN1C(=O)N=NC(=O)N2CCOCC2	FALSE		InChI=1S/C10H16N4O4/c15-9(13-1-5-17-6-2-13)11-12-10(16)14-3-7-18-8-4-14/h1-8H2		InChI=1S/C10H16N4O4/c15-9(13-1-5-17-6-2-13)11-12-10(16)14-3-7-18-8-4-14/h1-8H2		TRUE
4941	100.101.751	γ-cyclodextrine methyl esters						418-710-8		Omitted undefined stereo in OpenBabel	organic	mono-constituent substance	NONS	No longer valid			COCC1OC2OC3C(COC)OC(OC4C(COC)OC(OC5C(COC)OC(OC6C(CO)OC(OC7C(COC)OC(OC8C(COC)OC(OC9C(COC)OC(OC1C(O)C2O)C(OC)C9O)C(OC)C8O)C(O)C7O)C(OC)C6OC)C(O)C5OC)C(O)C4OC)C(OC)C3O									InChI=1S/C62H108O40/c1-73-16-24-40-31(64)33(66)55(88-24)96-43-27(19-76-4)94-61(52(84-12)36(43)69)102-47-30(22-79-7)91-58(39(72)49(47)81-9)101-46-29(21-78-6)90-57(38(71)48(46)80-8)100-45-23(15-63)87-62(54(86-14)53(45)85-13)98-41-25(17-74-2)89-56(34(67)32(41)65)95-42-26(18-75-3)92-60(50(82-10)35(42)68)99-44-28(20-77-5)93-59(97-40)51(83-11)37(44)70/h23-72H,15-22H2,1-14H3
4924	100.101.753	WACKER SILAN SLM 53979						418-730-7	64712-50-1	yes	organic	mono-constituent substance	NONS	No longer valid			CCCC[Si](C)(C)OC			DTXCID901410594	CCCC[Si](C)(C)OC	TRUE	CCCC[Si](C)(C)OC	TRUE		InChI=1S/C7H18OSi/c1-5-6-7-9(3,4)8-2/h5-7H2,1-4H3	InChI=1S/C7H18OSi/c1-5-6-7-9(3,4)8-2/h5-7H2,1-4H3	InChI=1S/C7H18OSi/c1-5-6-7-9(3,4)8-2/h5-7H2,1-4H3	TRUE	TRUE
4959	100.101.760	CD 350 White						418-800-7		yes	organic	mono-constituent substance	NONS	Tonnage data confidential			CC(=O)NC1=C(C=CC=C1)C1=NC2=C(C=CC=C2)C(=O)O1						CC(=O)NC1=CC=CC=C1C2=NC3=CC=CC=C3C(=O)O2	FALSE		InChI=1S/C16H12N2O3/c1-10(19)17-13-8-4-2-6-11(13)15-18-14-9-5-3-7-12(14)16(20)21-15/h2-9H,1H3,(H,17,19)		InChI=1S/C16H12N2O3/c1-10(19)17-13-8-4-2-6-11(13)15-18-14-9-5-3-7-12(14)16(20)21-15/h2-9H,1H3,(H,17,19)		TRUE
8400	100.101.772	MP3AA						418-940-9	14189-82-3	missing cis/trans infomation	organic	mono-constituent substance	INTERMEDIATE	Intermediate use only			CN(C=CC=O)C1=CC=CC=C1			DTXCID301359948	[H]C(C=O)=C([H])N(C)C1=CC=CC=C1	FALSE	CN(/C=C/C=O)C1=CC=CC=C1	FALSE		InChI=1S/C10H11NO/c1-11(8-5-9-12)10-6-3-2-4-7-10/h2-9H,1H3	InChI=1S/C10H11NO/c1-11(8-5-9-12)10-6-3-2-4-7-10/h2-9H,1H3	InChI=1S/C10H11NO/c1-11(8-5-9-12)10-6-3-2-4-7-10/h2-9H,1H3/b8-5+	TRUE	FALSE	N(C=CC=O)(C)C1=CC=CC=C1	InChI=1S/C10H11NO/c1-11(8-5-9-12)10-6-3-2-4-7-10/h2-9H,1H3	TRUE
9838	100.101.774	(ethyl-1,2-ethanediyl)]-2-[[[(2-hydroxyethyl)methylamino]acetyl]propyl]ω-(nonylphenoxy)poly[oxy(methyl-1,2-ethanediyl)						418-960-8		Omitted undefined stereo in OpenBabel	organic	mono-constituent substance	NONS	Tonnage data confidential			CCCCCCCCCC1=CC=C(OC(CC)COC(CC)COC(CC)COC(CC)COC(C)COC(C)COC(C)COC(C)COC(C)COC(C)COC(C)COC(C)CNC(=O)CN(C)CCO)C=C1									InChI=1S/C60H114N2O14/c1-15-20-21-22-23-24-25-26-54-27-29-59(30-28-54)76-58(19-5)45-75-57(18-4)44-74-56(17-3)43-73-55(16-2)42-72-53(13)41-71-52(12)40-70-51(11)39-69-50(10)38-68-49(9)37-67-48(8)36-66-47(7)35-65-46(6)33-61-60(64)34-62(14)31-32-63/h27-30,46-53,55-58,63H,15-26,31-45H2,1-14H3,(H,61,64)
9895	100.101.794	ethyl 7-(diethylamino)-2-oxo-2H-chromene-3-carboxylate						419-180-0	28705-46-6	yes	organic	mono-constituent substance	NONS	Tonnage data confidential			CCOC(=O)C1=CC2=C(OC1=O)C=C(C=C2)N(CC)CC			DTXCID6037857	CCOC(=O)C1=CC2=CC=C(C=C2OC1=O)N(CC)CC	FALSE	CCN(CC)C1=CC2=C(C=C1)C=C(C(=O)O2)C(=O)OCC	FALSE		InChI=1S/C16H19NO4/c1-4-17(5-2)12-8-7-11-9-13(15(18)20-6-3)16(19)21-14(11)10-12/h7-10H,4-6H2,1-3H3	InChI=1S/C16H19NO4/c1-4-17(5-2)12-8-7-11-9-13(15(18)20-6-3)16(19)21-14(11)10-12/h7-10H,4-6H2,1-3H3	InChI=1S/C16H19NO4/c1-4-17(5-2)12-8-7-11-9-13(15(18)20-6-3)16(19)21-14(11)10-12/h7-10H,4-6H2,1-3H3	TRUE	TRUE	N(CC)(CC)C=1C=C2C(C=C(C(OCC)=O)C(=O)O2)=CC1	InChI=1S/C16H19NO4/c1-4-17(5-2)12-8-7-11-9-13(15(18)20-6-3)16(19)21-14(11)10-12/h7-10H,4-6H2,1-3H3	TRUE
9900	100.101.796	1,3-diphenylpropane-1,2,3-trione 2-[O-(ethoxycarbonyl)oxime]						419-200-8		yes	organic	mono-constituent substance	NONS	Tonnage data confidential			CCOC(=O)ON=C(C(=O)C1=CC=CC=C1)C(=O)C1=CC=CC=C1						CCOC(=O)ON=C(C(=O)C1=CC=CC=C1)C(=O)C2=CC=CC=C2	FALSE		InChI=1S/C18H15NO5/c1-2-23-18(22)24-19-15(16(20)13-9-5-3-6-10-13)17(21)14-11-7-4-8-12-14/h3-12H,2H2,1H3		InChI=1S/C18H15NO5/c1-2-23-18(22)24-19-15(16(20)13-9-5-3-6-10-13)17(21)14-11-7-4-8-12-14/h3-12H,2H2,1H3		TRUE
9901	100.101.798	CATALYST 313B						419-220-7	60006-11-3	yes	organic	mono-constituent substance	NONS	Tonnage data confidential			CC1=C(NC(=O)N2CCCC2)C=C(NC(=O)N2CCCC2)C=C1			DTXCID5042742	CC1=CC=C(NC(=O)N2CCCC2)C=C1NC(=O)N1CCCC1	FALSE	CC1=C(C=C(C=C1)NC(=O)N2CCCC2)NC(=O)N3CCCC3	FALSE		InChI=1S/C17H24N4O2/c1-13-6-7-14(18-16(22)20-8-2-3-9-20)12-15(13)19-17(23)21-10-4-5-11-21/h6-7,12H,2-5,8-11H2,1H3,(H,18,22)(H,19,23)	InChI=1S/C17H24N4O2/c1-13-6-7-14(18-16(22)20-8-2-3-9-20)12-15(13)19-17(23)21-10-4-5-11-21/h6-7,12H,2-5,8-11H2,1H3,(H,18,22)(H,19,23)	InChI=1S/C17H24N4O2/c1-13-6-7-14(18-16(22)20-8-2-3-9-20)12-15(13)19-17(23)21-10-4-5-11-21/h6-7,12H,2-5,8-11H2,1H3,(H,18,22)(H,19,23)	TRUE	TRUE	N(C(=O)N1CCCC1)C2=CC(NC(=O)N3CCCC3)=CC=C2C	InChI=1S/C17H24N4O2/c1-13-6-7-14(18-16(22)20-8-2-3-9-20)12-15(13)19-17(23)21-10-4-5-11-21/h6-7,12H,2-5,8-11H2,1H3,(H,18,22)(H,19,23)	TRUE
5066	100.101.804	METHANOALDEHYDE						419-280-4	60070-19-1	Omitted undefined stereo in OpenBabel	organic	mono-constituent substance	NONS	Tonnage data confidential			O=CC12CC(C3=C1C=CC=C3)C1=C2C=CC=C1			DTXCID80447459	[H]C12CC(C=O)(C3=CC=CC=C13)C1=CC=CC=C21	FALSE	C1C2C3=CC=CC=C3C1(C4=CC=CC=C24)C=O	FALSE		InChI=1S/C16H12O/c17-10-16-9-13(11-5-1-3-7-14(11)16)12-6-2-4-8-15(12)16/h1-8,10,13H,9H2	InChI=1S/C16H12O/c17-10-16-9-13(11-5-1-3-7-14(11)16)12-6-2-4-8-15(12)16/h1-8,10,13H,9H2	InChI=1S/C16H12O/c17-10-16-9-13(11-5-1-3-7-14(11)16)12-6-2-4-8-15(12)16/h1-8,10,13H,9H2	TRUE	TRUE
4079	100.101.806	FLUTEC LE 12						419-300-1		Omitted undefined stereo in OpenBabel	organic	mono-constituent substance	NONS	No longer valid			FC1(F)C(F)(F)C(F)(F)C2(F)C(F)(C1(F)F)C(F)(F)C(F)(F)C1(F)C(F)(F)C(F)(C(F)(F)C(F)(F)C21F)C1(F)C(F)(F)C(F)(F)C2(F)C(F)(C(F)(F)C(F)(F)C3(F)C(F)(F)C(F)(F)C(F)(C(F)(F)C23F)C2(F)C(F)(F)C(F)(F)C3(F)C(F)(C(F)(F)C(F)(F)C4(F)C(F)(F)C(F)(F)C(F)(F)C(F)(F)C34F)C2(F)F)C1(F)F									InChI=1S/C42F68/c43-1-2(44)7(49,18(61,62)15(57,34(93,94)21(2,67)68)16(58)20(65,66)9(51)4(46,23(71,72)35(16,95)96)6(48)12(54,32(89,90)28(9,81)82)38(101,102)42(109,110)40(105,106)25(6,75)76)26(77,78)29(83,84)10(1,52)30(85,86)36(97,98)13(55,17(1,59)60)14(56)19(63,64)8(50)3(45,22(69,70)33(14,91)92)5(47)11(53,31(87,88)27(8,79)80)37(99,100)41(107,108)39(103,104)24(5,73)74
4062	100.101.808	RM96						419-320-0		Omitted undefined stereo in OpenBabel	organic	mono-constituent substance	NONS	Tonnage data confidential			CCC(C)CC1=CC=C(C=C1)C1=CC=C(OC(=O)C2=CC=C(OCCCCCCOC(=O)C=C)C=C2)C=C1						CCC(C)CC1=CC=C(C=C1)C2=CC=C(C=C2)OC(=O)C3=CC=C(C=C3)OCCCCCCOC(=O)C=C	FALSE		InChI=1S/C33H38O5/c1-4-25(3)24-26-10-12-27(13-11-26)28-14-20-31(21-15-28)38-33(35)29-16-18-30(19-17-29)36-22-8-6-7-9-23-37-32(34)5-2/h5,10-21,25H,2,4,6-9,22-24H2,1,3H3		InChI=1S/C33H38O5/c1-4-25(3)24-26-10-12-27(13-11-26)28-14-20-31(21-15-28)38-33(35)29-16-18-30(19-17-29)36-22-8-6-7-9-23-37-32(34)5-2/h5,10-21,25H,2,4,6-9,22-24H2,1,3H3		TRUE
4067	100.101.810	BMS-183981-01						419-340-1	132127-34-5	yes	organic	mono-constituent substance	NONS	Tonnage data confidential			O[C@@H]1[C@@H](NC1=O)C1=CC=CC=C1			DTXCID30387679	O[C@@H]1[C@@H](NC1=O)C1=CC=CC=C1	TRUE	C1=CC=C(C=C1)[C@H]2[C@H](C(=O)N2)O	FALSE		InChI=1S/C9H9NO2/c11-8-7(10-9(8)12)6-4-2-1-3-5-6/h1-5,7-8,11H,(H,10,12)/t7-,8+/m0/s1	InChI=1S/C9H9NO2/c11-8-7(10-9(8)12)6-4-2-1-3-5-6/h1-5,7-8,11H,(H,10,12)/t7-,8+/m0/s1	InChI=1S/C9H9NO2/c11-8-7(10-9(8)12)6-4-2-1-3-5-6/h1-5,7-8,11H,(H,10,12)/t7-,8+/m0/s1	TRUE	TRUE
4074	100.101.815	Polycondensation product of 3-(trihydroxysilyl)propansulfonic acid and tetraethoxysilane						419-390-2		Omitted undefined stereo in OpenBabel	organic	mono-constituent substance	NONS	Tonnage data confidential			O[Si](O)(O)O[Si](O)(O)O[Si](O)(O)O[Si](O)(CCCS(O)(=O)=O)O[Si](O)(O)O									InChI=1S/C3H18O18SSi5/c4-22(5,6)2-1-3-23(7,18-24(8,9)10)19-26(14,15)21-27(16,17)20-25(11,12)13/h7-17H,1-3H2,(H,4,5,6)
8421	100.101.817	SQ 32,035						419-420-4		yes	organic	mono-constituent substance	NONS	Tonnage data confidential			OC(=O)[C@H]1C[C@@H](CN1C(=O)C1=CC=CC=C1)C1=CC=CC=C1						C1[C@@H](CN([C@H]1C(=O)O)C(=O)C2=CC=CC=C2)C3=CC=CC=C3	FALSE		InChI=1S/C18H17NO3/c20-17(14-9-5-2-6-10-14)19-12-15(11-16(19)18(21)22)13-7-3-1-4-8-13/h1-10,15-16H,11-12H2,(H,21,22)/t15-,16+/m0/s1		InChI=1S/C18H17NO3/c20-17(14-9-5-2-6-10-14)19-12-15(11-16(19)18(21)22)13-7-3-1-4-8-13/h1-10,15-16H,11-12H2,(H,21,22)/t15-,16+/m0/s1		TRUE
12907	100.101.828	224 AUE						419-530-2		yes	organic	mono-constituent substance	NONS	Tonnage data confidential			CCCCCCCCCCCCS(=O)(=O)CCCC1=NNC2=C(Cl)C(=NN12)C(C)(C)C									InChI=1S/C23H41ClN4O2S/c1-5-6-7-8-9-10-11-12-13-14-17-31(29,30)18-15-16-19-25-26-22-20(24)21(23(2,3)4)27-28(19)22/h26H,5-18H2,1-4H3
4110	100.101.841	CLR-3						419-680-9		yes	organic	mono-constituent substance	NONS	Cease manufacture			CC(C)(C1=CC=C(C=C1)C(C)(C1=CC(CO)=C(O)C(CO)=C1)C1=CC(CO)=C(O)C(CO)=C1)C1=CC(CO)=C(O)C(CO)=C1						CC(C)(C1=CC=C(C=C1)C(C)(C2=CC(=C(C(=C2)CO)O)CO)C3=CC(=C(C(=C3)CO)O)CO)C4=CC(=C(C(=C4)CO)O)CO	FALSE		InChI=1S/C35H40O9/c1-34(2,28-8-20(14-36)31(42)21(9-28)15-37)26-4-6-27(7-5-26)35(3,29-10-22(16-38)32(43)23(11-29)17-39)30-12-24(18-40)33(44)25(13-30)19-41/h4-13,36-44H,14-19H2,1-3H3		InChI=1S/C35H40O9/c1-34(2,28-8-20(14-36)31(42)21(9-28)15-37)26-4-6-27(7-5-26)35(3,29-10-22(16-38)32(43)23(11-29)17-39)30-12-24(18-40)33(44)25(13-30)19-41/h4-13,36-44H,14-19H2,1-3H3		TRUE
30158	100.101.853	R-AMINR						419-800-1	112101-81-2	yes	organic	mono-constituent substance	FULL	≥ 0 to < 10 tonnes			COC1=C(C=C(C[C@@H](C)N)C=C1)S(N)(=O)=O			DTXCID901349569	[H][C@](C)(N)CC1=CC(=C(OC)C=C1)S(N)(=O)=O	FALSE	C[C@H](CC1=CC(=C(C=C1)OC)S(=O)(=O)N)N	FALSE		InChI=1S/C10H16N2O3S/c1-7(11)5-8-3-4-9(15-2)10(6-8)16(12,13)14/h3-4,6-7H,5,11H2,1-2H3,(H2,12,13,14)/t7-/m1/s1	InChI=1S/C10H16N2O3S/c1-7(11)5-8-3-4-9(15-2)10(6-8)16(12,13)14/h3-4,6-7H,5,11H2,1-2H3,(H2,12,13,14)/t7-/m1/s1	InChI=1S/C10H16N2O3S/c1-7(11)5-8-3-4-9(15-2)10(6-8)16(12,13)14/h3-4,6-7H,5,11H2,1-2H3,(H2,12,13,14)/t7-/m1/s1	TRUE	TRUE	S(N)(=O)(=O)C1=C(OC)C=CC(C[C@@H](C)N)=C1	InChI=1S/C10H16N2O3S/c1-7(11)5-8-3-4-9(15-2)10(6-8)16(12,13)14/h3-4,6-7H,5,11H2,1-2H3,(H2,12,13,14)/t7-/m1/s1	TRUE
4136	100.101.854	YM-617 BROMIDE						419-810-4	3259-03-8	yes	organic	mono-constituent substance	NONS	Tonnage data confidential			CCOC1=CC=CC=C1OCCBr			DTXCID20108774	CCOC1=CC=CC=C1OCCBr	TRUE	CCOC1=CC=CC=C1OCCBr	TRUE		InChI=1S/C10H13BrO2/c1-2-12-9-5-3-4-6-10(9)13-8-7-11/h3-6H,2,7-8H2,1H3	InChI=1S/C10H13BrO2/c1-2-12-9-5-3-4-6-10(9)13-8-7-11/h3-6H,2,7-8H2,1H3	InChI=1S/C10H13BrO2/c1-2-12-9-5-3-4-6-10(9)13-8-7-11/h3-6H,2,7-8H2,1H3	TRUE	TRUE	O(CCBr)C1=C(OCC)C=CC=C1	InChI=1S/C10H13BrO2/c1-2-12-9-5-3-4-6-10(9)13-8-7-11/h3-6H,2,7-8H2,1H3	TRUE
4197	100.101.868	CA 2079 A						419-950-6	35272-27-6	yes	organic	mono-constituent substance	NONS	No longer valid			OC(=O)C1=CC=CC2=C1SN=N2			DTXCID001024982	OC(=O)C1=CC=CC2=C1SN=N2	TRUE	C1=CC(=C2C(=C1)N=NS2)C(=O)O	FALSE		InChI=1S/C7H4N2O2S/c10-7(11)4-2-1-3-5-6(4)12-9-8-5/h1-3H,(H,10,11)	InChI=1S/C7H4N2O2S/c10-7(11)4-2-1-3-5-6(4)12-9-8-5/h1-3H,(H,10,11)	InChI=1S/C7H4N2O2S/c10-7(11)4-2-1-3-5-6(4)12-9-8-5/h1-3H,(H,10,11)	TRUE	TRUE	C(O)(=O)C1=C2C(N=NS2)=CC=C1	InChI=1S/C7H4N2O2S/c10-7(11)4-2-1-3-5-6(4)12-9-8-5/h1-3H,(H,10,11)	TRUE
4206	100.101.872	AP-5251						420-000-8	144908-01-0	yes	organic	mono-constituent substance	NONS	Tonnage data confidential			CO[Si](CCCOC(=O)CCNCCNCC1=CC=C(CC[Si](OC)(OC)OC)C=C1)(OC)OC			DTXCID501361141	CO[Si](CCCOC(=O)CCNCCNCC1=CC=C(CC[Si](OC)(OC)OC)C=C1)(OC)OC	TRUE	CO[Si](CCCOC(=O)CCNCCNCC1=CC=C(C=C1)CC[Si](OC)(OC)OC)(OC)OC	FALSE		InChI=1S/C23H44N2O8Si2/c1-27-34(28-2,29-3)18-7-17-33-23(26)12-14-24-15-16-25-20-22-10-8-21(9-11-22)13-19-35(30-4,31-5)32-6/h8-11,24-25H,7,12-20H2,1-6H3	InChI=1S/C23H44N2O8Si2/c1-27-34(28-2,29-3)18-7-17-33-23(26)12-14-24-15-16-25-20-22-10-8-21(9-11-22)13-19-35(30-4,31-5)32-6/h8-11,24-25H,7,12-20H2,1-6H3	InChI=1S/C23H44N2O8Si2/c1-27-34(28-2,29-3)18-7-17-33-23(26)12-14-24-15-16-25-20-22-10-8-21(9-11-22)13-19-35(30-4,31-5)32-6/h8-11,24-25H,7,12-20H2,1-6H3	TRUE	TRUE
4243	100.101.889	AC 900,001						420-180-8	137641-05-5	yes	organic	mono-constituent substance	NONS	Tonnage data confidential			FC1=CC=C(NC(=O)C2=CC=CC(OC3=CC(=CC=C3)C(F)(F)F)=N2)C=C1			DTXCID6024339	FC1=CC=C(NC(=O)C2=CC=CC(OC3=CC(=CC=C3)C(F)(F)F)=N2)C=C1	TRUE	C1=CC(=CC(=C1)OC2=CC=CC(=N2)C(=O)NC3=CC=C(C=C3)F)C(F)(F)F	FALSE		InChI=1S/C19H12F4N2O2/c20-13-7-9-14(10-8-13)24-18(26)16-5-2-6-17(25-16)27-15-4-1-3-12(11-15)19(21,22)23/h1-11H,(H,24,26)	InChI=1S/C19H12F4N2O2/c20-13-7-9-14(10-8-13)24-18(26)16-5-2-6-17(25-16)27-15-4-1-3-12(11-15)19(21,22)23/h1-11H,(H,24,26)	InChI=1S/C19H12F4N2O2/c20-13-7-9-14(10-8-13)24-18(26)16-5-2-6-17(25-16)27-15-4-1-3-12(11-15)19(21,22)23/h1-11H,(H,24,26)	TRUE	TRUE	O(C=1N=C(C(NC2=CC=C(F)C=C2)=O)C=CC1)C3=CC(C(F)(F)F)=CC=C3	InChI=1S/C19H12F4N2O2/c20-13-7-9-14(10-8-13)24-18(26)16-5-2-6-17(25-16)27-15-4-1-3-12(11-15)19(21,22)23/h1-11H,(H,24,26)	TRUE
9306	100.101.896	CHEMICAL 10055264						420-250-8	4899-82-5	missing cis/trans infomation	organic	mono-constituent substance	NONS	Tonnage data confidential			CCN(CC)C1=CC=C(C=C1)N=C1C=C(C(=O)NC)C(=O)C2=C1C=CC=C2			DTXCID80503569	CCN(CC)C1=CC=C(C=C1)\N=C1/C=C(C(=O)NC)C(=O)C2=CC=CC=C12	FALSE	CCN(CC)C1=CC=C(C=C1)N=C2C=C(C(=O)C3=CC=CC=C32)C(=O)NC	FALSE		InChI=1S/C22H23N3O2/c1-4-25(5-2)16-12-10-15(11-13-16)24-20-14-19(22(27)23-3)21(26)18-9-7-6-8-17(18)20/h6-14H,4-5H2,1-3H3,(H,23,27)	InChI=1S/C22H23N3O2/c1-4-25(5-2)16-12-10-15(11-13-16)24-20-14-19(22(27)23-3)21(26)18-9-7-6-8-17(18)20/h6-14H,4-5H2,1-3H3,(H,23,27)/b24-20+	InChI=1S/C22H23N3O2/c1-4-25(5-2)16-12-10-15(11-13-16)24-20-14-19(22(27)23-3)21(26)18-9-7-6-8-17(18)20/h6-14H,4-5H2,1-3H3,(H,23,27)	FALSE	TRUE
9309	100.101.897	CHEMICAL 10056133						420-260-2	102187-53-1	missing cis/trans infomation	organic	mono-constituent substance	NONS	Tonnage data confidential			CCN(CC)C1=CC=C(N=C2C=C(C(=O)NC)C(=O)C3=C2C=CC=C3)C(C)=C1			DTXCID60526413	CCN(CC)C1=CC(C)=C(C=C1)\N=C1/C=C(C(=O)NC)C(=O)C2=CC=CC=C12	FALSE	CCN(CC)C1=CC(=C(C=C1)N=C2C=C(C(=O)C3=CC=CC=C32)C(=O)NC)C	FALSE		InChI=1S/C23H25N3O2/c1-5-26(6-2)16-11-12-20(15(3)13-16)25-21-14-19(23(28)24-4)22(27)18-10-8-7-9-17(18)21/h7-14H,5-6H2,1-4H3,(H,24,28)	InChI=1S/C23H25N3O2/c1-5-26(6-2)16-11-12-20(15(3)13-16)25-21-14-19(23(28)24-4)22(27)18-10-8-7-9-17(18)21/h7-14H,5-6H2,1-4H3,(H,24,28)/b25-21+	InChI=1S/C23H25N3O2/c1-5-26(6-2)16-11-12-20(15(3)13-16)25-21-14-19(23(28)24-4)22(27)18-10-8-7-9-17(18)21/h7-14H,5-6H2,1-4H3,(H,24,28)	FALSE	TRUE
9311	100.101.898	CHEMICAL 10069389						420-270-7	161358-44-7	missing cis/trans infomation	organic	mono-constituent substance	NONS	Tonnage data confidential			CCN(C(C)C)C1=CC=C(C=C1)N=C1C=C(C(=O)NC)C(=O)C2=C1C=CC=C2			DTXCID70560146	CCN(C(C)C)C1=CC=C(C=C1)\N=C1/C=C(C(=O)NC)C(=O)C2=CC=CC=C12	FALSE	CCN(C1=CC=C(C=C1)N=C2C=C(C(=O)C3=CC=CC=C32)C(=O)NC)C(C)C	FALSE		InChI=1S/C23H25N3O2/c1-5-26(15(2)3)17-12-10-16(11-13-17)25-21-14-20(23(28)24-4)22(27)19-9-7-6-8-18(19)21/h6-15H,5H2,1-4H3,(H,24,28)	InChI=1S/C23H25N3O2/c1-5-26(15(2)3)17-12-10-16(11-13-17)25-21-14-20(23(28)24-4)22(27)19-9-7-6-8-18(19)21/h6-15H,5H2,1-4H3,(H,24,28)/b25-21+	InChI=1S/C23H25N3O2/c1-5-26(15(2)3)17-12-10-16(11-13-17)25-21-14-20(23(28)24-4)22(27)19-9-7-6-8-18(19)21/h6-15H,5H2,1-4H3,(H,24,28)	FALSE	TRUE
9317	100.101.899	CHEMICAL 10055621						420-280-1		missing cis/trans infomation	organic	mono-constituent substance	NONS	Tonnage data confidential			CCN(CC1=CC=CC=C1)C1=CC(NC(C)=O)=C(C=C1)N=NC1=C(C#N)C(C)=NS1						CCN(CC1=CC=CC=C1)C2=CC(=C(C=C2)N=NC3=C(C(=NS3)C)C#N)NC(=O)C	FALSE		InChI=1S/C22H22N6OS/c1-4-28(14-17-8-6-5-7-9-17)18-10-11-20(21(12-18)24-16(3)29)25-26-22-19(13-23)15(2)27-30-22/h5-12H,4,14H2,1-3H3,(H,24,29)		InChI=1S/C22H22N6OS/c1-4-28(14-17-8-6-5-7-9-17)18-10-11-20(21(12-18)24-16(3)29)25-26-22-19(13-23)15(2)27-30-22/h5-12H,4,14H2,1-3H3,(H,24,29)		TRUE
9320	100.101.900	CHEMICAL 10056597						420-290-6		missing cis/trans infomation	organic	mono-constituent substance	NONS	Tonnage data confidential			CCN1C2=C(C=CC=C2)C(C)(C)C1=CC=C1C(=O)N(N=C1N(C)C)C1=CC=CC=C1						CCN1C2=CC=CC=C2C(C1=CC=C3C(=NN(C3=O)C4=CC=CC=C4)N(C)C)(C)C	FALSE		InChI=1S/C25H28N4O/c1-6-28-21-15-11-10-14-20(21)25(2,3)22(28)17-16-19-23(27(4)5)26-29(24(19)30)18-12-8-7-9-13-18/h7-17H,6H2,1-5H3		InChI=1S/C25H28N4O/c1-6-28-21-15-11-10-14-20(21)25(2,3)22(28)17-16-19-23(27(4)5)26-29(24(19)30)18-12-8-7-9-13-18/h7-17H,6H2,1-5H3		TRUE
9322	100.101.901	CHEMICAL 10057031						420-300-9		missing cis/trans infomation	organic	mono-constituent substance	NONS	Tonnage data confidential			CCN(CC)C1=CC=C(C=C2C(=O)N(N=C2N(C)C)C2=CC=CC=C2)C=C1						CCN(CC)C1=CC=C(C=C1)C=C2C(=NN(C2=O)C3=CC=CC=C3)N(C)C	FALSE		InChI=1S/C22H26N4O/c1-5-25(6-2)18-14-12-17(13-15-18)16-20-21(24(3)4)23-26(22(20)27)19-10-8-7-9-11-19/h7-16H,5-6H2,1-4H3		InChI=1S/C22H26N4O/c1-5-25(6-2)18-14-12-17(13-15-18)16-20-21(24(3)4)23-26(22(20)27)19-10-8-7-9-11-19/h7-16H,5-6H2,1-4H3		TRUE
9328	100.101.903	A 93193						420-320-8	175161-86-1	yes	organic	mono-constituent substance	NONS	Tonnage data confidential			OC(=O)CN(C1=CC=CC=C1)C1=NC(S)=NC(S)=N1			DTXCID60579964	OC(=O)CN(C1=CC=CC=C1)C1=NC(=S)NC(=S)N1	FALSE	C1=CC=C(C=C1)N(CC(=O)O)C2=NC(=S)NC(=S)N2	FALSE		InChI=1S/C11H10N4O2S2/c16-8(17)6-15(7-4-2-1-3-5-7)9-12-10(18)14-11(19)13-9/h1-5H,6H2,(H,16,17)(H2,12,13,14,18,19)	InChI=1S/C11H10N4O2S2/c16-8(17)6-15(7-4-2-1-3-5-7)9-12-10(18)14-11(19)13-9/h1-5H,6H2,(H,16,17)(H2,12,13,14,18,19)	InChI=1S/C11H10N4O2S2/c16-8(17)6-15(7-4-2-1-3-5-7)9-12-10(18)14-11(19)13-9/h1-5H,6H2,(H,16,17)(H2,12,13,14,18,19)	TRUE	TRUE
9635	100.101.915	CHEMICAL 10057033						420-460-1		yes	organic	mono-constituent substance	NONS	Tonnage data confidential			CN(C)C1=NN(C(=O)\C1=C(\C#N)C1=CC=C(C=C1)N(C)C)C1=CC=CC=C1						CN(C)C1=CC=C(C=C1)/C(=C\2/C(=NN(C2=O)C3=CC=CC=C3)N(C)C)/C#N	FALSE		InChI=1S/C21H21N5O/c1-24(2)16-12-10-15(11-13-16)18(14-22)19-20(25(3)4)23-26(21(19)27)17-8-6-5-7-9-17/h5-13H,1-4H3/b19-18-		InChI=1S/C21H21N5O/c1-24(2)16-12-10-15(11-13-16)18(14-22)19-20(25(3)4)23-26(21(19)27)17-8-6-5-7-9-17/h5-13H,1-4H3/b19-18-		TRUE
3312	100.101.923	QUINAZOLINONE						420-550-9	119063-78-4	yes	organic	mono-constituent substance	NONS	Tonnage data confidential			CC1=NC2=CC(C)=C(C)C=C2C(=O)N1						CC1=CC2=C(C=C1C)NC(=NC2=O)C	FALSE		InChI=1S/C11H12N2O/c1-6-4-9-10(5-7(6)2)12-8(3)13-11(9)14/h4-5H,1-3H3,(H,12,13,14)		InChI=1S/C11H12N2O/c1-6-4-9-10(5-7(6)2)12-8(3)13-11(9)14/h4-5H,1-3H3,(H,12,13,14)		TRUE
3313	100.101.925	C6TF						420-570-8	39890-95-4	yes	organic	mono-constituent substance	NONS	No longer valid			FC(F)(F)C1=CC=CC(Cl)=N1			DTXCID40296243	FC(F)(F)C1=NC(Cl)=CC=C1	FALSE	C1=CC(=NC(=C1)Cl)C(F)(F)F	FALSE		InChI=1S/C6H3ClF3N/c7-5-3-1-2-4(11-5)6(8,9)10/h1-3H	InChI=1S/C6H3ClF3N/c7-5-3-1-2-4(11-5)6(8,9)10/h1-3H	InChI=1S/C6H3ClF3N/c7-5-3-1-2-4(11-5)6(8,9)10/h1-3H	TRUE	TRUE
9674	100.101.936	BRL 19440						420-690-0	19013-07-1	yes	organic	mono-constituent substance	NONS	Tonnage data confidential			CC(=O)C1=CC2=C(OC(C)(C)C=C2)C=C1			DTXCID7094977	CC(=O)C1=CC2=C(OC(C)(C)C=C2)C=C1	TRUE	CC(=O)C1=CC2=C(C=C1)OC(C=C2)(C)C	FALSE		InChI=1S/C13H14O2/c1-9(14)10-4-5-12-11(8-10)6-7-13(2,3)15-12/h4-8H,1-3H3	InChI=1S/C13H14O2/c1-9(14)10-4-5-12-11(8-10)6-7-13(2,3)15-12/h4-8H,1-3H3	InChI=1S/C13H14O2/c1-9(14)10-4-5-12-11(8-10)6-7-13(2,3)15-12/h4-8H,1-3H3	TRUE	TRUE	CC1(C)OC=2C(=CC(C(C)=O)=CC2)C=C1	InChI=1S/C13H14O2/c1-9(14)10-4-5-12-11(8-10)6-7-13(2,3)15-12/h4-8H,1-3H3	TRUE
3351	100.101.937	BLUE E195						420-700-3	134764-36-6	missing cis/trans infomation	organic	mono-constituent substance	NONS	Tonnage data confidential			COC1=C(C=C(NC(C)=O)C(=C1)N=NC1=NC=C(S1)N(=O)=O)N(CCOC(C)=O)CCOC(C)=O			DTXCID00672302	COC1=C(C=C(NC(C)=O)C(=C1)\N=N\C1=NC=C(S1)[N+]([O-])=O)N(CCOC(C)=O)CCOC(C)=O	Tautomer	CC(=O)NC1=CC(=C(C=C1N=NC2=NC=C(S2)[N+](=O)[O-])OC)N(CCOC(=O)C)CCOC(=O)C	FALSE		InChI=1S/C20H24N6O8S/c1-12(27)22-15-9-17(25(5-7-33-13(2)28)6-8-34-14(3)29)18(32-4)10-16(15)23-24-20-21-11-19(35-20)26(30)31/h9-11H,5-8H2,1-4H3,(H,22,27)	InChI=1S/C20H24N6O8S/c1-12(27)22-15-9-17(25(5-7-33-13(2)28)6-8-34-14(3)29)18(32-4)10-16(15)23-24-20-21-11-19(35-20)26(30)31/h9-11H,5-8H2,1-4H3,(H,22,27)/b24-23+	InChI=1S/C20H24N6O8S/c1-12(27)22-15-9-17(25(5-7-33-13(2)28)6-8-34-14(3)29)18(32-4)10-16(15)23-24-20-21-11-19(35-20)26(30)31/h9-11H,5-8H2,1-4H3,(H,22,27)	FALSE	TRUE	N(CCOC(C)=O)(CCOC(C)=O)C1=C(OC)C=C(N=NC=2SC(N(=O)=O)=CN2)C(NC(C)=O)=C1	InChI=1S/C20H24N6O8S/c1-12(27)22-15-9-17(25(5-7-33-13(2)28)6-8-34-14(3)29)18(32-4)10-16(15)23-24-20-21-11-19(35-20)26(30)31/h9-11H,5-8H2,1-4H3,(H,22,27)	TRUE
3374	100.101.949	ACRYLATE ORTHO ESTER						420-860-4	139995-55-4	Omitted undefined stereo in OpenBabel	organic	mono-constituent substance	NONS	Tonnage data confidential			COC1(C)OCC(COC(=O)C=C)O1			DTXCID30540707	COC1(C)OCC(COC(=O)C=C)O1	TRUE	CC1(OCC(O1)COC(=O)C=C)OC	FALSE		InChI=1S/C9H14O5/c1-4-8(10)12-5-7-6-13-9(2,11-3)14-7/h4,7H,1,5-6H2,2-3H3	InChI=1S/C9H14O5/c1-4-8(10)12-5-7-6-13-9(2,11-3)14-7/h4,7H,1,5-6H2,2-3H3	InChI=1S/C9H14O5/c1-4-8(10)12-5-7-6-13-9(2,11-3)14-7/h4,7H,1,5-6H2,2-3H3	TRUE	TRUE
3400	100.101.961	URACROSS P 3307						420-990-1	146421-65-0	yes	organic	mono-constituent substance	NONS	Tonnage data confidential			C=COCCCCOC(=O)NCCCCCCNC(=O)OCCCCOC=C			DTXCID50359313	C=COCCCCOC(=O)NCCCCCCNC(=O)OCCCCOC=C	TRUE	C=COCCCCOC(=O)NCCCCCCNC(=O)OCCCCOC=C	TRUE		InChI=1S/C20H36N2O6/c1-3-25-15-9-11-17-27-19(23)21-13-7-5-6-8-14-22-20(24)28-18-12-10-16-26-4-2/h3-4H,1-2,5-18H2,(H,21,23)(H,22,24)	InChI=1S/C20H36N2O6/c1-3-25-15-9-11-17-27-19(23)21-13-7-5-6-8-14-22-20(24)28-18-12-10-16-26-4-2/h3-4H,1-2,5-18H2,(H,21,23)(H,22,24)	InChI=1S/C20H36N2O6/c1-3-25-15-9-11-17-27-19(23)21-13-7-5-6-8-14-22-20(24)28-18-12-10-16-26-4-2/h3-4H,1-2,5-18H2,(H,21,23)(H,22,24)	TRUE	TRUE
3380	100.101.963	SPIRORBIS						421-010-5	965-40-2	yes	organic	mono-constituent substance	NONS	Tonnage data confidential			O=C(CCC(=O)OC1CCCCC1)OC1CCCCC1			DTXCID80164770	O=C(CCC(=O)OC1CCCCC1)OC1CCCCC1	TRUE	C1CCC(CC1)OC(=O)CCC(=O)OC2CCCCC2	FALSE		InChI=1S/C16H26O4/c17-15(19-13-7-3-1-4-8-13)11-12-16(18)20-14-9-5-2-6-10-14/h13-14H,1-12H2	InChI=1S/C16H26O4/c17-15(19-13-7-3-1-4-8-13)11-12-16(18)20-14-9-5-2-6-10-14/h13-14H,1-12H2	InChI=1S/C16H26O4/c17-15(19-13-7-3-1-4-8-13)11-12-16(18)20-14-9-5-2-6-10-14/h13-14H,1-12H2	TRUE	TRUE	O(C(CCC(OC1CCCCC1)=O)=O)C2CCCCC2	InChI=1S/C16H26O4/c17-15(19-13-7-3-1-4-8-13)11-12-16(18)20-14-9-5-2-6-10-14/h13-14H,1-12H2	TRUE
3385	100.101.964	POSM						421-020-1	156042-32-9	yes	organic	mono-constituent substance	NONS	Tonnage data confidential			CCCCCCCCCCCCCCCC(=O)N[C@@H](CO)C(=O)OCCCCCCCCCCCCCC			DTXCID2088525	CCCCCCCCCCCCCCCC(=O)N[C@@H](CO)C(=O)OCCCCCCCCCCCCCC	TRUE	CCCCCCCCCCCCCCCC(=O)N[C@@H](CO)C(=O)OCCCCCCCCCCCCCC	TRUE		InChI=1S/C33H65NO4/c1-3-5-7-9-11-13-15-17-18-20-22-24-26-28-32(36)34-31(30-35)33(37)38-29-27-25-23-21-19-16-14-12-10-8-6-4-2/h31,35H,3-30H2,1-2H3,(H,34,36)/t31-/m0/s1	InChI=1S/C33H65NO4/c1-3-5-7-9-11-13-15-17-18-20-22-24-26-28-32(36)34-31(30-35)33(37)38-29-27-25-23-21-19-16-14-12-10-8-6-4-2/h31,35H,3-30H2,1-2H3,(H,34,36)/t31-/m0/s1	InChI=1S/C33H65NO4/c1-3-5-7-9-11-13-15-17-18-20-22-24-26-28-32(36)34-31(30-35)33(37)38-29-27-25-23-21-19-16-14-12-10-8-6-4-2/h31,35H,3-30H2,1-2H3,(H,34,36)/t31-/m0/s1	TRUE	TRUE
3437	100.101.979	LS-157						421-190-5		yes	organic	mono-constituent substance	NONS	Tonnage data confidential			CCN(CC)C1=CC2=C(C=C1)C(C(=O)OCCOCCOC)=C(C1=NC3=C(S1)C=CC=C3)C(=O)O2									InChI=1S/C26H28N2O6S/c1-4-28(5-2)17-10-11-18-20(16-17)34-26(30)23(24-27-19-8-6-7-9-21(19)35-24)22(18)25(29)33-15-14-32-13-12-31-3/h6-11,16H,4-5,12-15H2,1-3H3
9796	100.101.998	BLACK WATER SOLUBLE DYE						421-410-1		missing cis/trans infomation	organic	mono-constituent substance	NONS	Tonnage data confidential			NC(=O)NC1=CC=C2C=C(C(N=NC3=CC=C(N=NC4=CC=C(C=C4)S(O)(=O)=O)C4=CC=C(C=C34)S(O)(=O)=O)=C(O)C2=C1)S(O)(=O)=O						C1=CC(=CC=C1N=NC2=C3C=CC(=CC3=C(C=C2)N=NC4=C(C=C5C=CC(=CC5=C4O)NC(=O)N)S(=O)(=O)O)S(=O)(=O)O)S(=O)(=O)O	FALSE		InChI=1S/C27H20N6O11S3/c28-27(35)29-16-2-1-14-11-24(47(42,43)44)25(26(34)20(14)12-16)33-32-23-10-9-22(19-8-7-18(13-21(19)23)46(39,40)41)31-30-15-3-5-17(6-4-15)45(36,37)38/h1-13,34H,(H3,28,29,35)(H,36,37,38)(H,39,40,41)(H,42,43,44)		InChI=1S/C27H20N6O11S3/c28-27(35)29-16-2-1-14-11-24(47(42,43)44)25(26(34)20(14)12-16)33-32-23-10-9-22(19-8-7-18(13-21(19)23)46(39,40)41)31-30-15-3-5-17(6-4-15)45(36,37)38/h1-13,34H,(H3,28,29,35)(H,36,37,38)(H,39,40,41)(H,42,43,44)		TRUE
9798	100.101.999	CHEMICAL 10099739						421-420-4		missing cis/trans infomation	organic	mono-constituent substance	NONS	Tonnage data confidential			CCN(CC1=CC=CC=C1)C1=CC(NC(=O)C(C)C)=C(C=C1)N=NC1=C(C#N)C(C)=NS1						CCN(CC1=CC=CC=C1)C2=CC(=C(C=C2)N=NC3=C(C(=NS3)C)C#N)NC(=O)C(C)C	FALSE		InChI=1S/C24H26N6OS/c1-5-30(15-18-9-7-6-8-10-18)19-11-12-21(22(13-19)26-23(31)16(2)3)27-28-24-20(14-25)17(4)29-32-24/h6-13,16H,5,15H2,1-4H3,(H,26,31)		InChI=1S/C24H26N6OS/c1-5-30(15-18-9-7-6-8-10-18)19-11-12-21(22(13-19)26-23(31)16(2)3)27-28-24-20(14-25)17(4)29-32-24/h6-13,16H,5,15H2,1-4H3,(H,26,31)		TRUE
9075	100.102.007	CIN # 10076634						421-500-9		yes	organic	mono-constituent substance	NONS	Tonnage data confidential			CCCCCCCCCCCCCCCCS(=O)(=O)NC1=C(OC2=C3C=CC=CC3=C(O)C(=C2)C(N)=O)C=CC(CSC2=NN=NN2CC(=O)OCCC)=C1						CCCCCCCCCCCCCCCCS(=O)(=O)NC1=C(C=CC(=C1)CSC2=NN=NN2CC(=O)OCCC)OC3=CC(=C(C4=CC=CC=C43)O)C(=O)N	FALSE		InChI=1S/C40H56N6O7S2/c1-3-5-6-7-8-9-10-11-12-13-14-15-16-19-25-55(50,51)43-34-26-30(29-54-40-42-44-45-46(40)28-37(47)52-24-4-2)22-23-35(34)53-36-27-33(39(41)49)38(48)32-21-18-17-20-31(32)36/h17-18,20-23,26-27,43,48H,3-16,19,24-25,28-29H2,1-2H3,(H2,41,49)		InChI=1S/C40H56N6O7S2/c1-3-5-6-7-8-9-10-11-12-13-14-15-16-19-25-55(50,51)43-34-26-30(29-54-40-42-44-45-46(40)28-37(47)52-24-4-2)22-23-35(34)53-36-27-33(39(41)49)38(48)32-21-18-17-20-31(32)36/h17-18,20-23,26-27,43,48H,3-16,19,24-25,28-29H2,1-2H3,(H2,41,49)		TRUE
2576	100.102.015	CYTOP						421-580-5	64080-43-9	yes	organic	mono-constituent substance	NONS	Tonnage data confidential			FC(F)=C(F)OC(F)(F)C(F)=C(F)F			DTXCID501326109	FC(F)=C(F)OC(F)(F)C(F)=C(F)F	TRUE	C(=C(F)F)(C(OC(=C(F)F)F)(F)F)F	FALSE		InChI=1S/C5F8O/c6-1(2(7)8)5(12,13)14-4(11)3(9)10	InChI=1S/C5F8O/c6-1(2(7)8)5(12,13)14-4(11)3(9)10	InChI=1S/C5F8O/c6-1(2(7)8)5(12,13)14-4(11)3(9)10	TRUE	TRUE	C(C(OC(=C(F)F)F)(F)F)(=C(F)F)F	InChI=1S/C5F8O/c6-1(2(7)8)5(12,13)14-4(11)3(9)10	TRUE
2596	100.102.016	TMCH						421-590-1	3274-12-2	yes	organic	mono-constituent substance	NONS	Tonnage data confidential			CC1(C=CC(=O)C=C1)C(Cl)(Cl)Cl			DTXCID00275796	CC1(C=CC(=O)C=C1)C(Cl)(Cl)Cl	TRUE	CC1(C=CC(=O)C=C1)C(Cl)(Cl)Cl	TRUE		InChI=1S/C8H7Cl3O/c1-7(8(9,10)11)4-2-6(12)3-5-7/h2-5H,1H3	InChI=1S/C8H7Cl3O/c1-7(8(9,10)11)4-2-6(12)3-5-7/h2-5H,1H3	InChI=1S/C8H7Cl3O/c1-7(8(9,10)11)4-2-6(12)3-5-7/h2-5H,1H3	TRUE	TRUE
2590	100.102.022	LONZAMON AAAMDEMA 100						421-650-5		yes	organic	mono-constituent substance	NONS	No longer valid			CC(=O)CC(=O)NC(C)(C)COC(=O)C(C)=C						CC(=C)C(=O)OCC(C)(C)NC(=O)CC(=O)C	FALSE		InChI=1S/C12H19NO4/c1-8(2)11(16)17-7-12(4,5)13-10(15)6-9(3)14/h1,6-7H2,2-5H3,(H,13,15)		InChI=1S/C12H19NO4/c1-8(2)11(16)17-7-12(4,5)13-10(15)6-9(3)14/h1,6-7H2,2-5H3,(H,13,15)		TRUE
2653	100.102.054	SYL-OFF(R) 7690 (LIS)						421-970-5		Omitted undefined stereo in OpenBabel	organic	mono-constituent substance	NONS	Tonnage data confidential			C[Si](C)(CCCCC=C)O[Si](C)(C)O[Si](C)(CCCCC=C)O[Si](C)(C)CCCCC=C						C[Si](C)(CCCCC=C)O[Si](C)(C)O[Si](C)(CCCCC=C)O[Si](C)(C)CCCCC=C	TRUE		InChI=1S/C25H54O3Si4/c1-11-14-17-20-23-29(4,5)26-31(8,9)28-32(10,25-22-19-16-13-3)27-30(6,7)24-21-18-15-12-2/h11-13H,1-3,14-25H2,4-10H3		InChI=1S/C25H54O3Si4/c1-11-14-17-20-23-29(4,5)26-31(8,9)28-32(10,25-22-19-16-13-3)27-30(6,7)24-21-18-15-12-2/h11-13H,1-3,14-25H2,4-10H3		TRUE
2655	100.102.055	DEPESA						421-980-1		yes	organic	mono-constituent substance	NONS	Tonnage data confidential			CCN(CC)C(=O)[N+]1=CC=C(CCS([O-])(=O)=O)C=C1						CCN(CC)C(=O)[N+]1=CC=C(C=C1)CCS(=O)(=O)[O-]	FALSE		InChI=1S/C12H18N2O4S/c1-3-13(4-2)12(15)14-8-5-11(6-9-14)7-10-19(16,17)18/h5-6,8-9H,3-4,7,10H2,1-2H3		InChI=1S/C12H18N2O4S/c1-3-13(4-2)12(15)14-8-5-11(6-9-14)7-10-19(16,17)18/h5-6,8-9H,3-4,7,10H2,1-2H3		TRUE
9148	100.102.059	MDT						422-020-2	133710-62-0	Omitted undefined stereo in OpenBabel	organic	mono-constituent substance	NONS	Tonnage data confidential			FC(F)(F)S(=O)(=O)ON1C(=O)C2C3CC(C=C3)C2C1=O						C1C2C=CC1C3C2C(=O)N(C3=O)OS(=O)(=O)C(F)(F)F	FALSE		InChI=1S/C10H8F3NO5S/c11-10(12,13)20(17,18)19-14-8(15)6-4-1-2-5(3-4)7(6)9(14)16/h1-2,4-7H,3H2		InChI=1S/C10H8F3NO5S/c11-10(12,13)20(17,18)19-14-8(15)6-4-1-2-5(3-4)7(6)9(14)16/h1-2,4-7H,3H2		TRUE
2672	100.102.064	AF-623						422-070-5		yes	organic	mono-constituent substance	NONS	Cease manufacture			CCCCCCCCCCCCCCOC(=O)CCC(=O)N(C)O						CCCCCCCCCCCCCCOC(=O)CCC(=O)N(C)O	TRUE		InChI=1S/C19H37NO4/c1-3-4-5-6-7-8-9-10-11-12-13-14-17-24-19(22)16-15-18(21)20(2)23/h23H,3-17H2,1-2H3		InChI=1S/C19H37NO4/c1-3-4-5-6-7-8-9-10-11-12-13-14-17-24-19(22)16-15-18(21)20(2)23/h23H,3-17H2,1-2H3		TRUE
2721	100.102.079	FP-NICOTINALDEHYD						422-220-1	169196-11-6	yes	organic	mono-constituent substance	NONS	No longer valid			COCC1=C(N=C(C(C)C)C(C=O)=C1C1=CC=C(F)C=C1)C(C)C			DTXCID00387166	COCC1=C(C2=CC=C(F)C=C2)C(C=O)=C(N=C1C(C)C)C(C)C	FALSE	CC(C)C1=C(C(=C(C(=N1)C(C)C)COC)C2=CC=C(C=C2)F)C=O	FALSE		InChI=1S/C20H24FNO2/c1-12(2)19-16(10-23)18(14-6-8-15(21)9-7-14)17(11-24-5)20(22-19)13(3)4/h6-10,12-13H,11H2,1-5H3	InChI=1S/C20H24FNO2/c1-12(2)19-16(10-23)18(14-6-8-15(21)9-7-14)17(11-24-5)20(22-19)13(3)4/h6-10,12-13H,11H2,1-5H3	InChI=1S/C20H24FNO2/c1-12(2)19-16(10-23)18(14-6-8-15(21)9-7-14)17(11-24-5)20(22-19)13(3)4/h6-10,12-13H,11H2,1-5H3	TRUE	TRUE
9184	100.102.082	BCAO						422-250-3		yes	organic	mono-constituent substance	NONS	Tonnage data confidential			CC(C)(C)OC(=O)N[C@H](C1CCCCC1)C(=O)N1CC[C@H]1C(O)=O						CC(C)(C)OC(=O)N[C@H](C1CCCCC1)C(=O)N2CC[C@H]2C(=O)O	FALSE		InChI=1S/C17H28N2O5/c1-17(2,3)24-16(23)18-13(11-7-5-4-6-8-11)14(20)19-10-9-12(19)15(21)22/h11-13H,4-10H2,1-3H3,(H,18,23)(H,21,22)/t12-,13+/m0/s1		InChI=1S/C17H28N2O5/c1-17(2,3)24-16(23)18-13(11-7-5-4-6-8-11)14(20)19-10-9-12(19)15(21)22/h11-13H,4-10H2,1-3H3,(H,18,23)(H,21,22)/t12-,13+/m0/s1		TRUE
2745	100.102.091	SETALUX 7005 XX-85						422-340-2		missing cis/trans infomation	organic	mono-constituent substance	NONS	Cease manufacture			CCCCCC(CC)=NCCCN(CCCN=C(CC)CCCCC)C(=O)NCCCCCCNC(=O)N(CCCN=C(CC)CCCCC)CCCN=C(CC)CCCCC									InChI=1S/C52H102N8O2/c1-9-17-23-33-47(13-5)53-39-29-43-59(44-30-40-54-48(14-6)34-24-18-10-2)51(61)57-37-27-21-22-28-38-58-52(62)60(45-31-41-55-49(15-7)35-25-19-11-3)46-32-42-56-50(16-8)36-26-20-12-4/h9-46H2,1-8H3,(H,57,61)(H,58,62)
2770	100.102.100	AE-18						422-430-1	161114-55-2	yes	organic	mono-constituent substance	NONS	Tonnage data confidential			CC1=CC=C(C=C1C)N(C1=CC=C(C=C1)C1=CC=CC=C1)C1=CC(C)=C(C)C=C1			DTXCID40393105	CC1=C(C)C=C(C=C1)N(C1=CC=C(C=C1)C1=CC=CC=C1)C1=CC(C)=C(C)C=C1	FALSE	CC1=C(C=C(C=C1)N(C2=CC=C(C=C2)C3=CC=CC=C3)C4=CC(=C(C=C4)C)C)C	FALSE		InChI=1S/C28H27N/c1-20-10-14-27(18-22(20)3)29(28-15-11-21(2)23(4)19-28)26-16-12-25(13-17-26)24-8-6-5-7-9-24/h5-19H,1-4H3	InChI=1S/C28H27N/c1-20-10-14-27(18-22(20)3)29(28-15-11-21(2)23(4)19-28)26-16-12-25(13-17-26)24-8-6-5-7-9-24/h5-19H,1-4H3	InChI=1S/C28H27N/c1-20-10-14-27(18-22(20)3)29(28-15-11-21(2)23(4)19-28)26-16-12-25(13-17-26)24-8-6-5-7-9-24/h5-19H,1-4H3	TRUE	TRUE
9210	100.102.105	AKA DC 24						422-480-4	100622-41-1	yes	organic	mono-constituent substance	NONS	Tonnage data confidential			BrC1=CC=C(CC2=NC3=C(N2)C=CC=C3)C=C1			DTXCID2032554	BrC1=CC=C(CC2=NC3=CC=CC=C3N2)C=C1	FALSE	C1=CC=C2C(=C1)NC(=N2)CC3=CC=C(C=C3)Br	FALSE		InChI=1S/C14H11BrN2/c15-11-7-5-10(6-8-11)9-14-16-12-3-1-2-4-13(12)17-14/h1-8H,9H2,(H,16,17)	InChI=1S/C14H11BrN2/c15-11-7-5-10(6-8-11)9-14-16-12-3-1-2-4-13(12)17-14/h1-8H,9H2,(H,16,17)	InChI=1S/C14H11BrN2/c15-11-7-5-10(6-8-11)9-14-16-12-3-1-2-4-13(12)17-14/h1-8H,9H2,(H,16,17)	TRUE	TRUE	C(C=1NC=2C(N1)=CC=CC2)C3=CC=C(Br)C=C3	InChI=1S/C14H11BrN2/c15-11-7-5-10(6-8-11)9-14-16-12-3-1-2-4-13(12)17-14/h1-8H,9H2,(H,16,17)	TRUE
9614	100.102.121	NT-12						422-640-3	64267-12-5	yes	organic	mono-constituent substance	NONS	Tonnage data confidential			COC1=CC2=C(C=C1)C=C(C(=O)C1=CC=CC=C1)C(=O)O2			DTXCID90272779	COC1=CC2=C(C=C1)C=C(C(=O)C1=CC=CC=C1)C(=O)O2	TRUE	COC1=CC2=C(C=C1)C=C(C(=O)O2)C(=O)C3=CC=CC=C3	FALSE		InChI=1S/C17H12O4/c1-20-13-8-7-12-9-14(17(19)21-15(12)10-13)16(18)11-5-3-2-4-6-11/h2-10H,1H3	InChI=1S/C17H12O4/c1-20-13-8-7-12-9-14(17(19)21-15(12)10-13)16(18)11-5-3-2-4-6-11/h2-10H,1H3	InChI=1S/C17H12O4/c1-20-13-8-7-12-9-14(17(19)21-15(12)10-13)16(18)11-5-3-2-4-6-11/h2-10H,1H3	TRUE	TRUE
8494	100.102.135	BI 26X-SA						422-780-5	129348-98-7	yes	organic	mono-constituent substance	NONS	Tonnage data confidential			CC1=CC(=CC(C)=C1O)C(C1=CC(C)=C(O)C(C)=C1)C1=CC=CC=C1O			DTXCID20570376	CC1=CC(=CC(C)=C1O)C(C1=CC(C)=C(O)C(C)=C1)C1=CC=CC=C1O	TRUE	CC1=CC(=CC(=C1O)C)C(C2=CC=CC=C2O)C3=CC(=C(C(=C3)C)O)C	FALSE		InChI=1S/C23H24O3/c1-13-9-17(10-14(2)22(13)25)21(19-7-5-6-8-20(19)24)18-11-15(3)23(26)16(4)12-18/h5-12,21,24-26H,1-4H3	InChI=1S/C23H24O3/c1-13-9-17(10-14(2)22(13)25)21(19-7-5-6-8-20(19)24)18-11-15(3)23(26)16(4)12-18/h5-12,21,24-26H,1-4H3	InChI=1S/C23H24O3/c1-13-9-17(10-14(2)22(13)25)21(19-7-5-6-8-20(19)24)18-11-15(3)23(26)16(4)12-18/h5-12,21,24-26H,1-4H3	TRUE	TRUE
4735	100.102.140	PPL ADDITIVE						422-830-6		Omitted undefined stereo in OpenBabel	organic	mono-constituent substance	NONS	Tonnage data confidential			CC(C)(C)C(C)(C)C(C)(C)C(C)(C)C(C)(C)C1(C)OC1(C)C									InChI=1S/C21H42O/c1-15(2,3)16(4,5)17(6,7)18(8,9)19(10,11)21(14)20(12,13)22-21/h1-14H3
4739	100.102.145	CP 33F						422-880-9		yes	organic	mono-constituent substance	NONS	Tonnage data confidential			[H][C@@]1(CCC(CCC)CC1)[C@@]1([H])CC[C@@H](CC1)C(=O)OC1=CC=C(CCC)C=C1F									InChI=1S/C25H37FO2/c1-3-5-18-7-10-20(11-8-18)21-12-14-22(15-13-21)25(27)28-24-16-9-19(6-4-2)17-23(24)26/h9,16-18,20-22H,3-8,10-15H2,1-2H3/t18?,20-,21-,22-
4763	100.102.146	CP 35F						422-890-3		yes	organic	mono-constituent substance	NONS	Tonnage data confidential			[H][C@@]1(CCC(CCC)CC1)[C@@]1([H])CC[C@@H](CC1)C(=O)OC1=CC=C(CCCCC)C=C1F									InChI=1S/C27H41FO2/c1-3-5-6-8-21-11-18-26(25(28)19-21)30-27(29)24-16-14-23(15-17-24)22-12-9-20(7-4-2)10-13-22/h11,18-20,22-24H,3-10,12-17H2,1-2H3/t20?,22-,23-,24-
4766	100.102.148	CHLOROTHIADIAZOLE						422-910-0	131986-28-2	yes	organic	mono-constituent substance	NONS	Tonnage data confidential			ClC1=NSN=C1C1=CN=CC=C1			DTXCID40391540	ClC1=NSN=C1C1=CN=CC=C1	TRUE	C1=CC(=CN=C1)C2=NSN=C2Cl	FALSE		InChI=1S/C7H4ClN3S/c8-7-6(10-12-11-7)5-2-1-3-9-4-5/h1-4H	InChI=1S/C7H4ClN3S/c8-7-6(10-12-11-7)5-2-1-3-9-4-5/h1-4H	InChI=1S/C7H4ClN3S/c8-7-6(10-12-11-7)5-2-1-3-9-4-5/h1-4H	TRUE	TRUE
17628	100.102.151	SILATRIZOLE						422-940-4	155633-54-8	Omitted undefined stereo in OpenBabel	organic	mono-constituent substance	FULL	≥ 100 tonnes			CC(CC1=CC(C)=CC(N2N=C3C=CC=CC3=N2)=C1O)C[Si](C)(O[Si](C)(C)C)O[Si](C)(C)C			DTXCID30382583	CC(CC1=C(O)C(=CC(C)=C1)N1N=C2C=CC=CC2=N1)C[Si](C)(O[Si](C)(C)C)O[Si](C)(C)C	FALSE	CC1=CC(=C(C(=C1)N2N=C3C=CC=CC3=N2)O)CC(C)C[Si](C)(O[Si](C)(C)C)O[Si](C)(C)C	FALSE		InChI=1S/C24H39N3O3Si3/c1-18-14-20(15-19(2)17-33(9,29-31(3,4)5)30-32(6,7)8)24(28)23(16-18)27-25-21-12-10-11-13-22(21)26-27/h10-14,16,19,28H,15,17H2,1-9H3	InChI=1S/C24H39N3O3Si3/c1-18-14-20(15-19(2)17-33(9,29-31(3,4)5)30-32(6,7)8)24(28)23(16-18)27-25-21-12-10-11-13-22(21)26-27/h10-14,16,19,28H,15,17H2,1-9H3	InChI=1S/C24H39N3O3Si3/c1-18-14-20(15-19(2)17-33(9,29-31(3,4)5)30-32(6,7)8)24(28)23(16-18)27-25-21-12-10-11-13-22(21)26-27/h10-14,16,19,28H,15,17H2,1-9H3	TRUE	TRUE	OC1=C(N2N=C3C(=N2)C=CC=C3)C=C(C)C=C1CC(C[Si](O[Si](C)(C)C)(O[Si](C)(C)C)C)C	InChI=1S/C24H39N3O3Si3/c1-18-14-20(15-19(2)17-33(9,29-31(3,4)5)30-32(6,7)8)24(28)23(16-18)27-25-21-12-10-11-13-22(21)26-27/h10-14,16,19,28H,15,17H2,1-9H3	TRUE
4772	100.102.160	TELEPHOTO 1						423-030-1	94856-25-4	Omitted undefined stereo in OpenBabel	organic	mono-constituent substance	NONS	Tonnage data confidential			C\C(C1=C(C)OC(C)=C1)=C1/C(=O)OC(=O)C1=C1C2CC3CC(C2)CC1C3						CC1=CC(=C(O1)C)/C(=C/2\C(=C3C4CC5CC(C4)CC3C5)C(=O)OC2=O)/C	FALSE		InChI=1S/C22H24O4/c1-10-4-17(12(3)25-10)11(2)18-20(22(24)26-21(18)23)19-15-6-13-5-14(8-15)9-16(19)7-13/h4,13-16H,5-9H2,1-3H3/b18-11+,20-19?		InChI=1S/C22H24O4/c1-10-4-17(12(3)25-10)11(2)18-20(22(24)26-21(18)23)19-15-6-13-5-14(8-15)9-16(19)7-13/h4,13-16H,5-9H2,1-3H3/b18-11+,20-19?		TRUE
9642	100.102.165	T001378						423-080-2	51939-71-0	Omitted undefined stereo in OpenBabel	organic	mono-constituent substance	NONS	Tonnage data confidential			OC(=O)C1CCC2=CC=CC=C2O1			DTXCID80320117	OC(=O)C1CCC2=CC=CC=C2O1	TRUE	C1CC2=CC=CC=C2OC1C(=O)O	FALSE		InChI=1S/C10H10O3/c11-10(12)9-6-5-7-3-1-2-4-8(7)13-9/h1-4,9H,5-6H2,(H,11,12)	InChI=1S/C10H10O3/c11-10(12)9-6-5-7-3-1-2-4-8(7)13-9/h1-4,9H,5-6H2,(H,11,12)	InChI=1S/C10H10O3/c11-10(12)9-6-5-7-3-1-2-4-8(7)13-9/h1-4,9H,5-6H2,(H,11,12)	TRUE	TRUE
4792	100.102.171	CMMPE						423-140-8		yes	organic	mono-constituent substance	NONS	Tonnage data confidential			COC1=CC=CC(OCC(O)=O)=C1CC(O)=O									InChI=1S/C11H12O6/c1-16-8-3-2-4-9(17-6-11(14)15)7(8)5-10(12)13/h2-4H,5-6H2,1H3,(H,12,13)(H,14,15)
9653	100.102.175	PHOTOSOL 7-222						423-190-0		yes	organic	mono-constituent substance	NONS	Tonnage data confidential			CCC1(O)C2=C(C=CC=C2)C2=C3C=CC=CC3=C3O[C@](C=CC3=C12)(C1=CC=CC=C1)C1=CC=C(C=C1)N1CCOCC1									InChI=1S/C38H33NO3/c1-2-37(40)33-15-9-8-14-31(33)34-29-12-6-7-13-30(29)36-32(35(34)37)20-21-38(42-36,26-10-4-3-5-11-26)27-16-18-28(19-17-27)39-22-24-41-25-23-39/h3-21,40H,2,22-25H2,1H3/t37?,38-/m1/s1
4838	100.102.191	BB-935						423-360-4		Omitted undefined stereo in OpenBabel	organic	mono-constituent substance	NONS	Tonnage data confidential			CCOC(=O)C(CC(C)C)NS(=O)(=O)C1=CC=C(CBr)C=C1						CCOC(=O)C(CC(C)C)NS(=O)(=O)C1=CC=C(C=C1)CBr	FALSE		InChI=1S/C15H22BrNO4S/c1-4-21-15(18)14(9-11(2)3)17-22(19,20)13-7-5-12(10-16)6-8-13/h5-8,11,14,17H,4,9-10H2,1-3H3		InChI=1S/C15H22BrNO4S/c1-4-21-15(18)14(9-11(2)3)17-22(19,20)13-7-5-12(10-16)6-8-13/h5-8,11,14,17H,4,9-10H2,1-3H3		TRUE
4825	100.102.194	RMS-019						423-390-8		Omitted undefined stereo in OpenBabel	organic	mono-constituent substance	NONS	Tonnage data confidential			CCN(CC)O[Si]1(C)O[Si](C)(CC)O[Si](C)(ON(CC)CC)O[Si](C)(ON(CC)CC)O1									InChI=1S/C18H47N3O7Si4/c1-12-19(13-2)22-30(9)25-29(8,18-7)26-31(10,23-20(14-3)15-4)28-32(11,27-30)24-21(16-5)17-6/h12-18H2,1-11H3
4856	100.102.198	CHROMOFINE BLACK A-1103						423-430-4		missing cis/trans infomation	organic	mono-constituent substance	NONS	Cease manufacture			COC1=CC=C(NC(=O)C2=C(O)C(N=NC3=CC=C(NC4=NC(=O)C5=C4C(Cl)=C(Cl)C(Cl)=C5Cl)C=C3)=C3C4=C(C=CC3=C2)C2=C(N4)C=CC=C2)C(C)=C1						CC1=C(C=CC(=C1)OC)NC(=O)C2=C(C(=C3C(=C2)C=CC4=C3NC5=CC=CC=C45)N=NC6=CC=C(C=C6)N=C7C8=C(C(=C(C(=C8Cl)Cl)Cl)Cl)C(=O)N7)O	FALSE		InChI=1S/C39H24Cl4N6O4/c1-17-15-21(53-2)12-14-25(17)46-38(51)24-16-18-7-13-23-22-5-3-4-6-26(22)45-34(23)27(18)35(36(24)50)49-48-20-10-8-19(9-11-20)44-37-28-29(39(52)47-37)31(41)33(43)32(42)30(28)40/h3-16,45,50H,1-2H3,(H,46,51)(H,44,47,52)		InChI=1S/C39H24Cl4N6O4/c1-17-15-21(53-2)12-14-25(17)46-38(51)24-16-18-7-13-23-22-5-3-4-6-26(22)45-34(23)27(18)35(36(24)50)49-48-20-10-8-19(9-11-20)44-37-28-29(39(52)47-37)31(41)33(43)32(42)30(28)40/h3-16,45,50H,1-2H3,(H,46,51)(H,44,47,52)		TRUE
4861	100.102.200	RIBATRIACETYL						423-450-3	39925-10-5	yes	organic	mono-constituent substance	NONS	Tonnage data confidential			COC(=O)C1=NN(C=N1)[C@@H]1O[C@H](COC(C)=O)[C@@H](OC(C)=O)[C@H]1OC(C)=O						CC(=O)OC[C@@H]1[C@H]([C@H]([C@@H](O1)N2C=NC(=N2)C(=O)OC)OC(=O)C)OC(=O)C	FALSE		InChI=1S/C15H19N3O9/c1-7(19)24-5-10-11(25-8(2)20)12(26-9(3)21)14(27-10)18-6-16-13(17-18)15(22)23-4/h6,10-12,14H,5H2,1-4H3/t10-,11-,12-,14-/m1/s1		InChI=1S/C15H19N3O9/c1-7(19)24-5-10-11(25-8(2)20)12(26-9(3)21)14(27-10)18-6-16-13(17-18)15(22)23-4/h6,10-12,14H,5H2,1-4H3/t10-,11-,12-,14-/m1/s1		TRUE	O(C(C)=O)[C@H]1[C@@](O[C@H](COC(C)=O)[C@H]1OC(C)=O)(N2N=C(C(OC)=O)N=C2)[H]	InChI=1S/C15H19N3O9/c1-7(19)24-5-10-11(25-8(2)20)12(26-9(3)21)14(27-10)18-6-16-13(17-18)15(22)23-4/h6,10-12,14H,5H2,1-4H3/t10-,11-,12-,14-/m1/s1	TRUE
3817	100.102.233	POLIFILM K42						423-780-8	75046-16-1	yes	organic	mono-constituent substance	NONS	No longer valid			C[N+](C)(CCCNS(=O)(=O)C(F)(F)C(F)(F)C(F)(F)C(F)(F)C(F)(F)C(F)(F)C(F)(F)C(F)(F)F)CC([O-])=O			DTXCID201079771	C[N+](C)(CCCNS(=O)(=O)C(F)(F)C(F)(F)C(F)(F)C(F)(F)C(F)(F)C(F)(F)C(F)(F)C(F)(F)F)CC([O-])=O	TRUE	C[N+](C)(CCCNS(=O)(=O)C(C(C(C(C(C(C(C(F)(F)F)(F)F)(F)F)(F)F)(F)F)(F)F)(F)F)(F)F)CC(=O)[O-]	FALSE		InChI=1S/C15H15F17N2O4S/c1-34(2,6-7(35)36)5-3-4-33-39(37,38)15(31,32)13(26,27)11(22,23)9(18,19)8(16,17)10(20,21)12(24,25)14(28,29)30/h33H,3-6H2,1-2H3	InChI=1S/C15H15F17N2O4S/c1-34(2,6-7(35)36)5-3-4-33-39(37,38)15(31,32)13(26,27)11(22,23)9(18,19)8(16,17)10(20,21)12(24,25)14(28,29)30/h33H,3-6H2,1-2H3	InChI=1S/C15H15F17N2O4S/c1-34(2,6-7(35)36)5-3-4-33-39(37,38)15(31,32)13(26,27)11(22,23)9(18,19)8(16,17)10(20,21)12(24,25)14(28,29)30/h33H,3-6H2,1-2H3	TRUE	TRUE
3843	100.102.240	SOB 5414						423-850-8	94491-26-6	missing cis/trans infomation	organic	mono-constituent substance	NONS	Tonnage data confidential			CCCCCCCCCCCCNC(=O)C(=CC=C1OCC(C)(C)N1CC)C#N			DTXCID00649276	CCCCCCCCCCCCNC(=O)C(=CC=C1OCC(C)(C)N1CC)C#N	TRUE	CCCCCCCCCCCCNC(=O)C(=CC=C1N(C(CO1)(C)C)CC)C#N	FALSE		InChI=1S/C24H41N3O2/c1-5-7-8-9-10-11-12-13-14-15-18-26-23(28)21(19-25)16-17-22-27(6-2)24(3,4)20-29-22/h16-17H,5-15,18,20H2,1-4H3,(H,26,28)	InChI=1S/C24H41N3O2/c1-5-7-8-9-10-11-12-13-14-15-18-26-23(28)21(19-25)16-17-22-27(6-2)24(3,4)20-29-22/h16-17H,5-15,18,20H2,1-4H3,(H,26,28)	InChI=1S/C24H41N3O2/c1-5-7-8-9-10-11-12-13-14-15-18-26-23(28)21(19-25)16-17-22-27(6-2)24(3,4)20-29-22/h16-17H,5-15,18,20H2,1-4H3,(H,26,28)	TRUE	TRUE
17640	100.102.253	TMC						423-980-5	2453-03-4	yes	organic	mono-constituent substance	FULL	≥ 1 to < 10 tonnes	O=C1OCCCO1		O=C1OCCCO1			DTXSID20953766	O=C1OCCCO1	TRUE	C1COC(=O)OC1			InChI=1S/C4H6O3/c5-4-6-2-1-3-7-4/h1-3H2	InChI=1S/C4H6O3/c5-4-6-2-1-3-7-4/h1-3H2	InChI=1S/C4H6O3/c5-4-6-2-1-3-7-4/h1-3H2	TRUE	TRUE	O=C1OCCCO1	InChI=1S/C4H6O3/c5-4-6-2-1-3-7-4/h1-3H2	TRUE
3880	100.102.255	NT-13						424-020-8	184955-23-5	yes	organic	mono-constituent substance	NONS	Tonnage data confidential			CCCCCCCNC(=O)C1=CC=C(C=C1)C1=NC(=NC(=N1)C(Cl)(Cl)Cl)C(Cl)(Cl)Cl			DTXCID40549706	CCCCCCCNC(=O)C1=CC=C(C=C1)C1=NC(=NC(=N1)C(Cl)(Cl)Cl)C(Cl)(Cl)Cl	TRUE	CCCCCCCNC(=O)C1=CC=C(C=C1)C2=NC(=NC(=N2)C(Cl)(Cl)Cl)C(Cl)(Cl)Cl	FALSE		InChI=1S/C19H20Cl6N4O/c1-2-3-4-5-6-11-26-15(30)13-9-7-12(8-10-13)14-27-16(18(20,21)22)29-17(28-14)19(23,24)25/h7-10H,2-6,11H2,1H3,(H,26,30)	InChI=1S/C19H20Cl6N4O/c1-2-3-4-5-6-11-26-15(30)13-9-7-12(8-10-13)14-27-16(18(20,21)22)29-17(28-14)19(23,24)25/h7-10H,2-6,11H2,1H3,(H,26,30)	InChI=1S/C19H20Cl6N4O/c1-2-3-4-5-6-11-26-15(30)13-9-7-12(8-10-13)14-27-16(18(20,21)22)29-17(28-14)19(23,24)25/h7-10H,2-6,11H2,1H3,(H,26,30)	TRUE	TRUE
3893	100.102.261	HSY-2188						424-080-5	78333-49-0	Omitted undefined stereo in OpenBabel	organic	mono-constituent substance	NONS	Tonnage data confidential			CCCCCCCCOC(=O)C1=CC=C2C(=O)C(C(=O)C2=C1)C1=C(O)C=C2C=CC=CC2=N1			DTXCID601027815	CCCCCCCCOC(=O)C1=CC2=C(C=C1)C(=O)C(C2=O)C1=C(O)C=C2C=CC=CC2=N1	FALSE	CCCCCCCCOC(=O)C1=CC2=C(C=C1)C(=O)C(C2=O)C3=NC4=CC=CC=C4C=C3O	FALSE		InChI=1S/C27H27NO5/c1-2-3-4-5-6-9-14-33-27(32)18-12-13-19-20(15-18)26(31)23(25(19)30)24-22(29)16-17-10-7-8-11-21(17)28-24/h7-8,10-13,15-16,23,29H,2-6,9,14H2,1H3	InChI=1S/C27H27NO5/c1-2-3-4-5-6-9-14-33-27(32)18-12-13-19-20(15-18)26(31)23(25(19)30)24-22(29)16-17-10-7-8-11-21(17)28-24/h7-8,10-13,15-16,23,29H,2-6,9,14H2,1H3	InChI=1S/C27H27NO5/c1-2-3-4-5-6-9-14-33-27(32)18-12-13-19-20(15-18)26(31)23(25(19)30)24-22(29)16-17-10-7-8-11-21(17)28-24/h7-8,10-13,15-16,23,29H,2-6,9,14H2,1H3	TRUE	TRUE	O=C1C(C(=O)C=2C1=CC(C(OCCCCCCCC)=O)=CC2)C3=NC4=C(C=C3O)C=CC=C4	InChI=1S/C27H27NO5/c1-2-3-4-5-6-9-14-33-27(32)18-12-13-19-20(15-18)26(31)23(25(19)30)24-22(29)16-17-10-7-8-11-21(17)28-24/h7-8,10-13,15-16,23,29H,2-6,9,14H2,1H3	TRUE
8997	100.102.268	HOE 642 STADE 4						424-150-5	159139-35-2	yes	organic	mono-constituent substance	NONS	Tonnage data confidential			CC(C)C1=CC=C(C=C1S(C)(=O)=O)C(O)=O						CC(C)C1=C(C=C(C=C1)C(=O)O)S(=O)(=O)C	FALSE		InChI=1S/C11H14O4S/c1-7(2)9-5-4-8(11(12)13)6-10(9)16(3,14)15/h4-7H,1-3H3,(H,12,13)		InChI=1S/C11H14O4S/c1-7(2)9-5-4-8(11(12)13)6-10(9)16(3,14)15/h4-7H,1-3H3,(H,12,13)		TRUE
9009	100.102.275	NT-16						424-230-1		yes	organic	mono-constituent substance	NONS	Tonnage data confidential			CCCCCCCNC(=O)C1=CC=C(C=C1)C#N									InChI=1S/C15H20N2O/c1-2-3-4-5-6-11-17-15(18)14-9-7-13(12-16)8-10-14/h7-10H,2-6,11H2,1H3,(H,17,18)
3971	100.102.286	PHENYLENEDIAMINE DYE						424-340-8	4595-01-1	missing cis/trans infomation	organic	mono-constituent substance	NONS	Tonnage data confidential			CCN(CC)C1=CC=C(C=C1)N=C1C(C)=NN(C1=O)C1=CC=CC=C1						CCN(CC)C1=CC=C(C=C1)N=C2C(=NN(C2=O)C3=CC=CC=C3)C	FALSE		InChI=1S/C20H22N4O/c1-4-23(5-2)17-13-11-16(12-14-17)21-19-15(3)22-24(20(19)25)18-9-7-6-8-10-18/h6-14H,4-5H2,1-3H3		InChI=1S/C20H22N4O/c1-4-23(5-2)17-13-11-16(12-14-17)21-19-15(3)22-24(20(19)25)18-9-7-6-8-10-18/h6-14H,4-5H2,1-3H3		TRUE
3965	100.102.294	AQUA-CERAMIDE						424-420-2	185740-18-5	Omitted undefined stereo in OpenBabel	organic	mono-constituent substance	NONS	Tonnage data confidential			CCCCCCCCCCCCCCCCOCC(CN(CCCOC)C(=O)CCCCCCCCCCCCC)OCC(O)CO				CCCCCCCCCCCCCCCCOCC(CN(CCCOC)C(=O)CCCCCCCCCCCCC)OCC(O)CO	TRUE	CCCCCCCCCCCCCCCCOCC(CN(CCCOC)C(=O)CCCCCCCCCCCCC)OCC(CO)O	FALSE		InChI=1S/C40H81NO6/c1-4-6-8-10-12-14-16-17-18-20-22-24-26-28-33-46-37-39(47-36-38(43)35-42)34-41(31-29-32-45-3)40(44)30-27-25-23-21-19-15-13-11-9-7-5-2/h38-39,42-43H,4-37H2,1-3H3	InChI=1S/C40H81NO6/c1-4-6-8-10-12-14-16-17-18-20-22-24-26-28-33-46-37-39(47-36-38(43)35-42)34-41(31-29-32-45-3)40(44)30-27-25-23-21-19-15-13-11-9-7-5-2/h38-39,42-43H,4-37H2,1-3H3	InChI=1S/C40H81NO6/c1-4-6-8-10-12-14-16-17-18-20-22-24-26-28-33-46-37-39(47-36-38(43)35-42)34-41(31-29-32-45-3)40(44)30-27-25-23-21-19-15-13-11-9-7-5-2/h38-39,42-43H,4-37H2,1-3H3	TRUE	TRUE
9040	100.102.296	GR 90						424-440-1	825-85-4	yes	organic	mono-constituent substance	NONS	Tonnage data confidential			CC1=CC=C(C=C1)N(C)(C)=O			DTXCID501022793	CC1=CC=C(C=C1)[N+](C)(C)[O-]	FALSE	CC1=CC=C(C=C1)[N+](C)(C)[O-]	FALSE		InChI=1S/C9H13NO/c1-8-4-6-9(7-5-8)10(2,3)11/h4-7H,1-3H3	InChI=1S/C9H13NO/c1-8-4-6-9(7-5-8)10(2,3)11/h4-7H,1-3H3	InChI=1S/C9H13NO/c1-8-4-6-9(7-5-8)10(2,3)11/h4-7H,1-3H3	TRUE	TRUE	N(C)(C)(=O)C1=CC=C(C)C=C1	InChI=1S/C9H13NO/c1-8-4-6-9(7-5-8)10(2,3)11/h4-7H,1-3H3	TRUE
3975	100.102.299	FX-020M						424-470-5		Omitted undefined stereo in OpenBabel	organic	mono-constituent substance	NONS	Tonnage data confidential			CO[Si](O)(CCCN)O[Si](CCCNCC(O)COC1=CC=C(OCC(O)CNCCC[Si](OC)(O[Si](O)(CCCN)OC)O[Si](O)(OC)OC)C=C1)(OC)O[Si](O)(OC)OC									InChI=1S/C32H74N4O20Si6/c1-43-57(39,21-9-17-33)53-59(45-3,55-61(41,47-5)48-6)23-11-19-35-25-29(37)27-51-31-13-15-32(16-14-31)52-28-30(38)26-36-20-12-24-60(46-4,56-62(42,49-7)50-8)54-58(40,44-2)22-10-18-34/h13-16,29-30,35-42H,9-12,17-28,33-34H2,1-8H3
4391	100.102.311	1H-Pyrrole-2,5-dione, 1,1'-[methylenebis(2-ethyl-6-methyl-4,1-phenylene)]bis-						424-600-0	105391-33-1	yes	organic	mono-constituent substance	NONS	Cease manufacture			CCC1=CC(CC2=CC(CC)=C(N3C(=O)C=CC3=O)C(C)=C2)=CC(C)=C1N1C(=O)C=CC1=O				CCC1=CC(CC2=CC(C)=C(N3C(=O)C=CC3=O)C(CC)=C2)=CC(C)=C1N1C(=O)C=CC1=O	FALSE	CCC1=C(C(=CC(=C1)CC2=CC(=C(C(=C2)C)N3C(=O)C=CC3=O)CC)C)N4C(=O)C=CC4=O	FALSE		InChI=1S/C27H26N2O4/c1-5-20-14-18(11-16(3)26(20)28-22(30)7-8-23(28)31)13-19-12-17(4)27(21(6-2)15-19)29-24(32)9-10-25(29)33/h7-12,14-15H,5-6,13H2,1-4H3	InChI=1S/C27H26N2O4/c1-5-20-14-18(11-16(3)26(20)28-22(30)7-8-23(28)31)13-19-12-17(4)27(21(6-2)15-19)29-24(32)9-10-25(29)33/h7-12,14-15H,5-6,13H2,1-4H3	InChI=1S/C27H26N2O4/c1-5-20-14-18(11-16(3)26(20)28-22(30)7-8-23(28)31)13-19-12-17(4)27(21(6-2)15-19)29-24(32)9-10-25(29)33/h7-12,14-15H,5-6,13H2,1-4H3	TRUE	TRUE	C(C)C1=C(C(C)=CC(CC2=CC(CC)=C(C(C)=C2)N3C(=O)C=CC3=O)=C1)N4C(=O)C=CC4=O	InChI=1S/C27H26N2O4/c1-5-20-14-18(11-16(3)26(20)28-22(30)7-8-23(28)31)13-19-12-17(4)27(21(6-2)15-19)29-24(32)9-10-25(29)33/h7-12,14-15H,5-6,13H2,1-4H3	TRUE
9443	100.102.316	9,9-bis-(methoxymethyl)fluorene						424-650-3	182121-12-6	no SMILES	organic	mono-constituent substance	NONS	Tonnage data confidential	COCC1(COC)C2=CC=CC=C2C2=CC=CC=C12						COCC1(COC)C2=CC=CC=C2C2=CC=CC=C12		COCC1(C2=CC=CC=C2C3=CC=CC=C31)COC				InChI=1S/C17H18O2/c1-18-11-17(12-19-2)15-9-5-3-7-13(15)14-8-4-6-10-16(14)17/h3-10H,11-12H2,1-2H3	InChI=1S/C17H18O2/c1-18-11-17(12-19-2)15-9-5-3-7-13(15)14-8-4-6-10-16(14)17/h3-10H,11-12H2,1-2H3		TRUE	C(OC)C1(COC)C=2C(C=3C1=CC=CC3)=CC=CC2	InChI=1S/C17H18O2/c1-18-11-17(12-19-2)15-9-5-3-7-13(15)14-8-4-6-10-16(14)17/h3-10H,11-12H2,1-2H3	TRUE
9449	100.102.317	2,5-dioxopyrrolidin-1-yl N-{[methyl[[2-(1-methylethyl)-4-thiazolyl]methyl]amino]carbonyl}-.sc.l.sc.-valinate						424-660-8	224631-15-6	yes	organic	mono-constituent substance	NONS	No longer valid			CC(C)[C@H](NC(=O)N(C)CC1=CSC(=N1)C(C)C)C(=O)ON1C(=O)CCC1=O			DTXCID601373472	[H][C@](N=C(O)N(C)CC1=CSC(=N1)C(C)C)(C(C)C)C(=O)ON1C(=O)CCC1=O	FALSE	CC(C)C1=NC(=CS1)CN(C)C(=O)N[C@@H](C(C)C)C(=O)ON2C(=O)CCC2=O	FALSE		InChI=1S/C18H26N4O5S/c1-10(2)15(17(25)27-22-13(23)6-7-14(22)24)20-18(26)21(5)8-12-9-28-16(19-12)11(3)4/h9-11,15H,6-8H2,1-5H3,(H,20,26)/t15-/m0/s1	InChI=1S/C18H26N4O5S/c1-10(2)15(17(25)27-22-13(23)6-7-14(22)24)20-18(26)21(5)8-12-9-28-16(19-12)11(3)4/h9-11,15H,6-8H2,1-5H3,(H,20,26)/t15-/m0/s1	InChI=1S/C18H26N4O5S/c1-10(2)15(17(25)27-22-13(23)6-7-14(22)24)20-18(26)21(5)8-12-9-28-16(19-12)11(3)4/h9-11,15H,6-8H2,1-5H3,(H,20,26)/t15-/m0/s1	TRUE	TRUE
3053	100.102.318	PHENOL 2486						424-670-2		yes	organic	mono-constituent substance	NONS	Tonnage data confidential			OC1=CC=C(C=C1)N1CCN(CC1)C1=CC=NC=C1						C1CN(CCN1C2=CC=C(C=C2)O)C3=CC=NC=C3	FALSE		InChI=1S/C15H17N3O/c19-15-3-1-13(2-4-15)17-9-11-18(12-10-17)14-5-7-16-8-6-14/h1-8,19H,9-12H2		InChI=1S/C15H17N3O/c19-15-3-1-13(2-4-15)17-9-11-18(12-10-17)14-5-7-16-8-6-14/h1-8,19H,9-12H2		TRUE
3075	100.102.327	UK-292,068						424-770-6	194602-25-0	yes	organic	mono-constituent substance	NONS	Tonnage data confidential			FC1=CC(F)=C(C=C1)C(CN1C=NC=N1)(CN1C=NC=N1)OP(=O)(OCC1=CC=CC=C1)OCC1=CC=CC=C1			DTXCID10675682	FC1=CC(F)=C(C=C1)C(CN1C=NC=N1)(CN1C=NC=N1)P(=O)(OCC1=CC=CC=C1)OCC1=CC=CC=C1	FALSE	C1=CC=C(C=C1)COP(=O)(OCC2=CC=CC=C2)OC(CN3C=NC=N3)(CN4C=NC=N4)C5=C(C=C(C=C5)F)F	FALSE	inconsistent structure	InChI=1S/C27H25F2N6O4P/c28-24-11-12-25(26(29)13-24)27(16-34-20-30-18-32-34,17-35-21-31-19-33-35)39-40(36,37-14-22-7-3-1-4-8-22)38-15-23-9-5-2-6-10-23/h1-13,18-21H,14-17H2	InChI=1S/C27H25F2N6O3P/c28-24-11-12-25(26(29)13-24)27(16-34-20-30-18-32-34,17-35-21-31-19-33-35)39(36,37-14-22-7-3-1-4-8-22)38-15-23-9-5-2-6-10-23/h1-13,18-21H,14-17H2	InChI=1S/C27H25F2N6O4P/c28-24-11-12-25(26(29)13-24)27(16-34-20-30-18-32-34,17-35-21-31-19-33-35)39-40(36,37-14-22-7-3-1-4-8-22)38-15-23-9-5-2-6-10-23/h1-13,18-21H,14-17H2	FALSE	TRUE
9484	100.102.336	TRANSLUZONE						424-860-5	195251-91-3	yes	organic	mono-constituent substance	NONS	Tonnage data confidential			CC(C)(C)C1=CC=C2OCC(=O)COC2=C1			DTXCID7029958	CC(C)(C)C1=CC2=C(OCC(=O)CO2)C=C1	FALSE	CC(C)(C)C1=CC2=C(C=C1)OCC(=O)CO2	FALSE		InChI=1S/C13H16O3/c1-13(2,3)9-4-5-11-12(6-9)16-8-10(14)7-15-11/h4-6H,7-8H2,1-3H3	InChI=1S/C13H16O3/c1-13(2,3)9-4-5-11-12(6-9)16-8-10(14)7-15-11/h4-6H,7-8H2,1-3H3	InChI=1S/C13H16O3/c1-13(2,3)9-4-5-11-12(6-9)16-8-10(14)7-15-11/h4-6H,7-8H2,1-3H3	TRUE	TRUE	C(C)(C)(C)C=1C=C2C(=CC1)OCC(=O)CO2	InChI=1S/C13H16O3/c1-13(2,3)9-4-5-11-12(6-9)16-8-10(14)7-15-11/h4-6H,7-8H2,1-3H3	TRUE
9491	100.102.339	PARSOL 309						424-900-1		Omitted undefined stereo in OpenBabel	organic	mono-constituent substance	NONS	Tonnage data confidential			COC1=CC=C(\C=C\C(=O)OCC(C)(C)C(O)C(=O)NCCCO)C=C1									InChI=1S/C19H27NO6/c1-19(2,17(23)18(24)20-11-4-12-21)13-26-16(22)10-7-14-5-8-15(25-3)9-6-14/h5-10,17,21,23H,4,11-13H2,1-3H3,(H,20,24)/b10-7+
3105	100.102.340	DT-S1						424-910-6		yes	organic	mono-constituent substance	NONS	Tonnage data confidential			CC1=CC=C(C=C1)N(C1=CC=C(C)C=C1)C1=CC=C(C=C2C3=C(C=CC=C3)C=CC3=C2C=CC=C3)C=C1						CC1=CC=C(C=C1)N(C2=CC=C(C=C2)C)C3=CC=C(C=C3)C=C4C5=CC=CC=C5C=CC6=CC=CC=C64	FALSE		InChI=1S/C36H29N/c1-26-11-19-31(20-12-26)37(32-21-13-27(2)14-22-32)33-23-15-28(16-24-33)25-36-34-9-5-3-7-29(34)17-18-30-8-4-6-10-35(30)36/h3-25H,1-2H3		InChI=1S/C36H29N/c1-26-11-19-31(20-12-26)37(32-21-13-27(2)14-22-32)33-23-15-28(16-24-33)25-36-34-9-5-3-7-29(34)17-18-30-8-4-6-10-35(30)36/h3-25H,1-2H3		TRUE
9497	100.102.341	ORANGE IRGAPHOR 502A						424-920-0	209129-65-7	yes	organic	mono-constituent substance	NONS	Tonnage data confidential			CCC(C)(C)OC(=O)N1C(=O)C2=C(N(C(=O)OC(C)(C)CC)C(=O)C2=C1C1=CC=C(Cl)C=C1)C1=CC=C(Cl)C=C1			DTXCID101028387	CCC(C)(C)OC(=O)N1C(=O)C2=C(N(C(=O)OC(C)(C)CC)C(=O)C2=C1C1=CC=C(Cl)C=C1)C1=CC=C(Cl)C=C1	TRUE	CCC(C)(C)OC(=O)N1C(=C2C(=C(N(C2=O)C(=O)OC(C)(C)CC)C3=CC=C(C=C3)Cl)C1=O)C4=CC=C(C=C4)Cl	FALSE		InChI=1S/C30H30Cl2N2O6/c1-7-29(3,4)39-27(37)33-23(17-9-13-19(31)14-10-17)21-22(25(33)35)24(18-11-15-20(32)16-12-18)34(26(21)36)28(38)40-30(5,6)8-2/h9-16H,7-8H2,1-6H3	InChI=1S/C30H30Cl2N2O6/c1-7-29(3,4)39-27(37)33-23(17-9-13-19(31)14-10-17)21-22(25(33)35)24(18-11-15-20(32)16-12-18)34(26(21)36)28(38)40-30(5,6)8-2/h9-16H,7-8H2,1-6H3	InChI=1S/C30H30Cl2N2O6/c1-7-29(3,4)39-27(37)33-23(17-9-13-19(31)14-10-17)21-22(25(33)35)24(18-11-15-20(32)16-12-18)34(26(21)36)28(38)40-30(5,6)8-2/h9-16H,7-8H2,1-6H3	TRUE	TRUE	O=C1C=2C(=C(N1C(OC(CC)(C)C)=O)C3=CC=C(Cl)C=C3)C(=O)N(C(OC(CC)(C)C)=O)C2C4=CC=C(Cl)C=C4	InChI=1S/C30H30Cl2N2O6/c1-7-29(3,4)39-27(37)33-23(17-9-13-19(31)14-10-17)21-22(25(33)35)24(18-11-15-20(32)16-12-18)34(26(21)36)28(38)40-30(5,6)8-2/h9-16H,7-8H2,1-6H3	TRUE
9496	100.102.342	B21030						424-940-1		missing cis/trans infomation	organic	mono-constituent substance	NONS	Tonnage data confidential			CCC(=CC1=[N+](CC)C2=C(O1)C=CC(=C2)C1=CC=CC=C1)C=C1SC2=C(C=CC=C2)N1CC(=O)[N-]S(C)(=O)=O						CC/C(=C\C1=[N+](C2=CC=CC=C2S1)C/C(=N\S(=O)(=O)C)/[O-])/C=C\3/N(C4=C(O3)C=CC(=C4)C5=CC=CC=C5)CC	FALSE		InChI=1S/C30H29N3O4S2/c1-4-21(18-30-33(20-28(34)31-39(3,35)36)24-13-9-10-14-27(24)38-30)17-29-32(5-2)25-19-23(15-16-26(25)37-29)22-11-7-6-8-12-22/h6-19H,4-5,20H2,1-3H3		InChI=1S/C30H29N3O4S2/c1-4-21(18-30-33(20-28(34)31-39(3,35)36)24-13-9-10-14-27(24)38-30)17-29-32(5-2)25-19-23(15-16-26(25)37-29)22-11-7-6-8-12-22/h6-19H,4-5,20H2,1-3H3		TRUE
3116	100.102.344	TOMP-MESYLAT						424-960-9		yes	organic	mono-constituent substance	NONS	Tonnage data confidential			CC(C)(C)OC(=O)C[C@@H]1C[C@@H](COS(C)(=O)=O)NC1=O						CC(C)(C)OC(=O)C[C@@H]1C[C@H](NC1=O)COS(=O)(=O)C	FALSE		InChI=1S/C12H21NO6S/c1-12(2,3)19-10(14)6-8-5-9(13-11(8)15)7-18-20(4,16)17/h8-9H,5-7H2,1-4H3,(H,13,15)/t8-,9-/m0/s1		InChI=1S/C12H21NO6S/c1-12(2,3)19-10(14)6-8-5-9(13-11(8)15)7-18-20(4,16)17/h8-9H,5-7H2,1-4H3,(H,13,15)/t8-,9-/m0/s1		TRUE
33431	100.102.345	SDBR						424-970-3	166255-23-8	yes	organic	mono-constituent substance	FULL	Tonnage data confidential			CCO[Si](CCCC1=C(O)C(=CC(C(=O)C2=CC=CC=C2)=C1O)C(=O)C1=CC=CC=C1)(OCC)OCC			DTXCID101028032	CCO[Si](CCCC1=C(O)C(=CC(C(=O)C2=CC=CC=C2)=C1O)C(=O)C1=CC=CC=C1)(OCC)OCC	TRUE	CCO[Si](CCCC1=C(C(=CC(=C1O)C(=O)C2=CC=CC=C2)C(=O)C3=CC=CC=C3)O)(OCC)OCC	FALSE		InChI=1S/C29H34O7Si/c1-4-34-37(35-5-2,36-6-3)19-13-18-23-28(32)24(26(30)21-14-9-7-10-15-21)20-25(29(23)33)27(31)22-16-11-8-12-17-22/h7-12,14-17,20,32-33H,4-6,13,18-19H2,1-3H3	InChI=1S/C29H34O7Si/c1-4-34-37(35-5-2,36-6-3)19-13-18-23-28(32)24(26(30)21-14-9-7-10-15-21)20-25(29(23)33)27(31)22-16-11-8-12-17-22/h7-12,14-17,20,32-33H,4-6,13,18-19H2,1-3H3	InChI=1S/C29H34O7Si/c1-4-34-37(35-5-2,36-6-3)19-13-18-23-28(32)24(26(30)21-14-9-7-10-15-21)20-25(29(23)33)27(31)22-16-11-8-12-17-22/h7-12,14-17,20,32-33H,4-6,13,18-19H2,1-3H3	TRUE	TRUE	C(=O)(C1=CC(C(=O)C2=CC=CC=C2)=C(O)C(CCC[Si](OCC)(OCC)OCC)=C1O)C3=CC=CC=C3	InChI=1S/C29H34O7Si/c1-4-34-37(35-5-2,36-6-3)19-13-18-23-28(32)24(26(30)21-14-9-7-10-15-21)20-25(29(23)33)27(31)22-16-11-8-12-17-22/h7-12,14-17,20,32-33H,4-6,13,18-19H2,1-3H3	TRUE
9510	100.102.348	T001790						425-010-6	24190-77-0	yes	organic	mono-constituent substance	NONS	Tonnage data confidential			COC(=O)C1=C(O)C=C(NC(C)=O)C(Cl)=C1			DTXCID00487791	COC(=O)C1=CC(Cl)=C(NC(C)=O)C=C1O	FALSE	CC(=O)NC1=C(C=C(C(=C1)O)C(=O)OC)Cl	FALSE		InChI=1S/C10H10ClNO4/c1-5(13)12-8-4-9(14)6(3-7(8)11)10(15)16-2/h3-4,14H,1-2H3,(H,12,13)	InChI=1S/C10H10ClNO4/c1-5(13)12-8-4-9(14)6(3-7(8)11)10(15)16-2/h3-4,14H,1-2H3,(H,12,13)	InChI=1S/C10H10ClNO4/c1-5(13)12-8-4-9(14)6(3-7(8)11)10(15)16-2/h3-4,14H,1-2H3,(H,12,13)	TRUE	TRUE
9527	100.102.359	PN-13						425-130-9	7696-70-0	yes	organic	mono-constituent substance	NONS	Tonnage data confidential			CN(C)C1=CC=C(NC2=CC=C(C=C2)N=O)C=C1			DTXCID60547007	CN(C)C1=CC=C(NC2=CC=C(C=C2)N=O)C=C1	TRUE	CN(C)C1=CC=C(C=C1)NC2=CC=C(C=C2)N=O	FALSE		InChI=1S/C14H15N3O/c1-17(2)14-9-7-12(8-10-14)15-11-3-5-13(16-18)6-4-11/h3-10,15H,1-2H3	InChI=1S/C14H15N3O/c1-17(2)14-9-7-12(8-10-14)15-11-3-5-13(16-18)6-4-11/h3-10,15H,1-2H3	InChI=1S/C14H15N3O/c1-17(2)14-9-7-12(8-10-14)15-11-3-5-13(16-18)6-4-11/h3-10,15H,1-2H3	TRUE	TRUE
3187	100.102.379	(17β)-3-oxoestra-4,6-dien-17-yl acetate						425-330-6	2590-41-2	yes	organic	mono-constituent substance	NONS	Tonnage data confidential			[H][C@@]12CC[C@H](OC(C)=O)[C@@]1(C)CC[C@]1([H])[C@@]3([H])CCC(=O)C=C3C=C[C@@]21[H]						CC(=O)O[C@H]1CC[C@@H]2[C@@]1(CC[C@H]3[C@H]2C=CC4=CC(=O)CC[C@H]34)C	FALSE		InChI=1S/C20H26O3/c1-12(21)23-19-8-7-18-17-5-3-13-11-14(22)4-6-15(13)16(17)9-10-20(18,19)2/h3,5,11,15-19H,4,6-10H2,1-2H3/t15-,16+,17+,18-,19-,20-/m0/s1		InChI=1S/C20H26O3/c1-12(21)23-19-8-7-18-17-5-3-13-11-14(22)4-6-15(13)16(17)9-10-20(18,19)2/h3,5,11,15-19H,4,6-10H2,1-2H3/t15-,16+,17+,18-,19-,20-/m0/s1		TRUE
3205	100.102.390	ALKYL SUBSTITUTED SILICA GEL						425-440-4		yes	organic	mono-constituent substance	NONS	Tonnage data confidential			CC(C)(C)CC[Si](O)(O)O[Si](O)(O)O[Si](O)(O[Si](O)(O)CCC(C)(C)C)O[Si](O)(O)O[Si](O)(O)CCC(C)(C)C									InChI=1S/C18H50O16Si6/c1-16(2,3)10-13-35(19,20)30-38(25,26)33-40(29,32-37(23,24)15-12-18(7,8)9)34-39(27,28)31-36(21,22)14-11-17(4,5)6/h19-29H,10-15H2,1-9H3
3206	100.102.393	AGK 4373						425-470-8		yes	organic	mono-constituent substance	NONS	Tonnage data confidential			CCC(C)(C)C1=CC(=C(OCCCC(=O)NC2=CC=C(OC3=C4C=CC=CC4=C(O)C(=C3)C(=O)NCCC(O)=O)C=C2)C=C1)C(C)(C)CC						CCC(C)(C)C1=CC(=C(C=C1)OCCCC(=O)NC2=CC=C(C=C2)OC3=CC(=C(C4=CC=CC=C43)O)C(=O)NCCC(=O)O)C(C)(C)CC	FALSE		InChI=1S/C40H48N2O7/c1-7-39(3,4)26-15-20-33(32(24-26)40(5,6)8-2)48-23-11-14-35(43)42-27-16-18-28(19-17-27)49-34-25-31(38(47)41-22-21-36(44)45)37(46)30-13-10-9-12-29(30)34/h9-10,12-13,15-20,24-25,46H,7-8,11,14,21-23H2,1-6H3,(H,41,47)(H,42,43)(H,44,45)		InChI=1S/C40H48N2O7/c1-7-39(3,4)26-15-20-33(32(24-26)40(5,6)8-2)48-23-11-14-35(43)42-27-16-18-28(19-17-27)49-34-25-31(38(47)41-22-21-36(44)45)37(46)30-13-10-9-12-29(30)34/h9-10,12-13,15-20,24-25,46H,7-8,11,14,21-23H2,1-6H3,(H,41,47)(H,42,43)(H,44,45)		TRUE
3222	100.102.401	HYDROXYESTER 2486						425-550-2		yes	organic	mono-constituent substance	NONS	Tonnage data confidential			C[C@@H](CO)CC(=O)OC(C)(C)C						C[C@H](CC(=O)OC(C)(C)C)CO	FALSE		InChI=1S/C9H18O3/c1-7(6-10)5-8(11)12-9(2,3)4/h7,10H,5-6H2,1-4H3/t7-/m1/s1		InChI=1S/C9H18O3/c1-7(6-10)5-8(11)12-9(2,3)4/h7,10H,5-6H2,1-4H3/t7-/m1/s1		TRUE
3628	100.102.407	3940W92						425-610-8		yes	organic	mono-constituent substance	NONS	Tonnage data confidential			CNC(=N)S(O)(=O)=O						CN=C(N)S(=O)(=O)O	FALSE		InChI=1S/C2H6N2O3S/c1-4-2(3)8(5,6)7/h1H3,(H2,3,4)(H,5,6,7)		InChI=1S/C2H6N2O3S/c1-4-2(3)8(5,6)7/h1H3,(H2,3,4)(H,5,6,7)		TRUE
3631	100.102.410	M743BU						425-640-1		yes	organic	mono-constituent substance	NONS	Tonnage data confidential			SC1=NN=C(SCCCOCC(COCCCSC2=NN=C(S)S2)OCCCSC2=NN=C(S)S2)S1									InChI=1S/C18H26N6O3S9/c28-13-19-22-16(34-13)31-7-1-4-25-10-12(27-6-3-9-33-18-24-21-15(30)36-18)11-26-5-2-8-32-17-23-20-14(29)35-17/h12H,1-11H2,(H,19,28)(H,20,29)(H,21,30)
9904	100.102.414	SUBSTANCE 717W91						425-680-1	168960-18-7	yes	organic	mono-constituent substance	NONS	Tonnage data confidential			CC(C)(C)OC(=O)N[C@@H]1C[C@H](CO)C=C1						CC(C)(C)OC(=O)N[C@@H]1C[C@@H](C=C1)CO	FALSE		InChI=1S/C11H19NO3/c1-11(2,3)15-10(14)12-9-5-4-8(6-9)7-13/h4-5,8-9,13H,6-7H2,1-3H3,(H,12,14)/t8-,9+/m1/s1		InChI=1S/C11H19NO3/c1-11(2,3)15-10(14)12-9-5-4-8(6-9)7-13/h4-5,8-9,13H,6-7H2,1-3H3,(H,12,14)/t8-,9+/m1/s1		TRUE
3611	100.102.415	DP5000						425-690-4	589-37-7	Omitted undefined stereo in OpenBabel	organic	mono-constituent substance	NONS	Tonnage data confidential			CCC(N)CCN			DTXCID20815057	CCC(N)CCN	TRUE	CCC(CCN)N	FALSE		InChI=1S/C5H14N2/c1-2-5(7)3-4-6/h5H,2-4,6-7H2,1H3	InChI=1S/C5H14N2/c1-2-5(7)3-4-6/h5H,2-4,6-7H2,1H3	InChI=1S/C5H14N2/c1-2-5(7)3-4-6/h5H,2-4,6-7H2,1H3	TRUE	TRUE	C(CCN)(CC)N	InChI=1S/C5H14N2/c1-2-5(7)3-4-6/h5H,2-4,6-7H2,1H3	TRUE
28020	100.102.434	4-(6-acryloyloxyhexyloxy)benzoic acid (4-(trans-4-propylcyclohexyl)phenyl ester)						425-880-7		yes	organic	mono-constituent substance	FULL	≥ 1 to < 10 tonnes			[H][C@]1(CCC)CC[C@@]([H])(CC1)C1=CC=C(OC(=O)C2=CC=C(OCCCCCCOC(=O)C=C)C=C2)C=C1									InChI=1S/C31H40O5/c1-3-9-24-10-12-25(13-11-24)26-14-20-29(21-15-26)36-31(33)27-16-18-28(19-17-27)34-22-7-5-6-8-23-35-30(32)4-2/h4,14-21,24-25H,2-3,5-13,22-23H2,1H3/t24-,25-
3685	100.102.435	ACETONIDE ACID						425-890-1	157518-70-2	yes	organic	mono-constituent substance	NONS	Tonnage data confidential			[H][C@]1(OC(C)(C)OC1=O)[C@@H](CC(C)C)C(O)=O			DTXCID801364318	[H][C@](CC(C)C)(C(O)=O)[C@]1([H])OC(C)(C)OC1=O	FALSE	CC(C)C[C@H]([C@H]1C(=O)OC(O1)(C)C)C(=O)O	FALSE		InChI=1S/C11H18O5/c1-6(2)5-7(9(12)13)8-10(14)16-11(3,4)15-8/h6-8H,5H2,1-4H3,(H,12,13)/t7-,8+/m1/s1	InChI=1S/C11H18O5/c1-6(2)5-7(9(12)13)8-10(14)16-11(3,4)15-8/h6-8H,5H2,1-4H3,(H,12,13)/t7-,8+/m1/s1	InChI=1S/C11H18O5/c1-6(2)5-7(9(12)13)8-10(14)16-11(3,4)15-8/h6-8H,5H2,1-4H3,(H,12,13)/t7-,8+/m1/s1	TRUE	TRUE	[C@H](CC(C)C)(C(O)=O)[C@@]1(OC(C)(C)OC1=O)[H]	InChI=1S/C11H18O5/c1-6(2)5-7(9(12)13)8-10(14)16-11(3,4)15-8/h6-8H,5H2,1-4H3,(H,12,13)/t7-,8+/m1/s1	TRUE
8892	100.102.440	FLS-507						425-940-2		Omitted undefined stereo in OpenBabel	organic	mono-constituent substance	NONS	Tonnage data confidential			C[Si](C)(C)O[Si](C)(C)O[Si](C)(CCCC(F)(F)C(F)(F)C(F)(F)C(F)(F)C(F)(F)C(F)(F)C(F)(F)C(F)(F)F)O[Si](C)(C)C									InChI=1S/C20H33F17O3Si4/c1-41(2,3)38-43(7,8)40-44(9,39-42(4,5)6)12-10-11-13(21,22)14(23,24)15(25,26)16(27,28)17(29,30)18(31,32)19(33,34)20(35,36)37/h10-12H2,1-9H3
8895	100.102.442	ACA 250 POLYMER SOLID						425-960-1		no	organic	mono-constituent substance	NONS	Tonnage data confidential			COC(=O)C(C(C)C(C(C)[Xe])C(O)=O)C(C(C)[Xe])C(=O)OC1CCC(COC(=O)C=C)CC1O								polymer
8899	100.102.445	B-21588						425-990-5		missing cis/trans infomation	organic	mono-constituent substance	NONS	Tonnage data confidential			CN1C(OC2=C1C=C(NS(C)(=O)=O)C=C2)=CC=CC=C(C#N)C(=C(C#N)C#N)C1=CC=C(NS(C)(=O)=O)C=C1						CN1C2=C(C=CC(=C2)NS(=O)(=O)C)OC1=CC=CC=C(C#N)C(=C(C#N)C#N)C3=CC=C(C=C3)NS(=O)(=O)C	FALSE		InChI=1S/C26H22N6O5S2/c1-32-23-14-22(31-39(3,35)36)12-13-24(23)37-25(32)7-5-4-6-19(15-27)26(20(16-28)17-29)18-8-10-21(11-9-18)30-38(2,33)34/h4-14,30-31H,1-3H3		InChI=1S/C26H22N6O5S2/c1-32-23-14-22(31-39(3,35)36)12-13-24(23)37-25(32)7-5-4-6-19(15-27)26(20(16-28)17-29)18-8-10-21(11-9-18)30-38(2,33)34/h4-14,30-31H,1-3H3		TRUE
2265	100.102.447	PTH-CARBAESTER						426-010-9	41844-71-7	yes	organic	mono-constituent substance	NONS	Tonnage data confidential			COC(=O)N[C@@H](CC1=CC=CC=C1)C(=O)OC			DTXCID40393307	COC(=O)N[C@@H](CC1=CC=CC=C1)C(=O)OC	TRUE	COC(=O)[C@H](CC1=CC=CC=C1)NC(=O)OC	FALSE		InChI=1S/C12H15NO4/c1-16-11(14)10(13-12(15)17-2)8-9-6-4-3-5-7-9/h3-7,10H,8H2,1-2H3,(H,13,15)/t10-/m0/s1	InChI=1S/C12H15NO4/c1-16-11(14)10(13-12(15)17-2)8-9-6-4-3-5-7-9/h3-7,10H,8H2,1-2H3,(H,13,15)/t10-/m0/s1	InChI=1S/C12H15NO4/c1-16-11(14)10(13-12(15)17-2)8-9-6-4-3-5-7-9/h3-7,10H,8H2,1-2H3,(H,13,15)/t10-/m0/s1	TRUE	TRUE
8917	100.102.455	SC-188						426-090-5	138446-23-8	Omitted undefined stereo in OpenBabel	organic	mono-constituent substance	NONS	Tonnage data confidential			OC1=CC(O)=C(C=C1)C12CCCCC1C1(CCCCC1)C1=C(O2)C=C(O)C=C1						C1CCC2(CC1)C3CCCCC3(OC4=C2C=CC(=C4)O)C5=C(C=C(C=C5)O)O	FALSE		InChI=1S/C24H28O4/c25-16-7-9-18(20(27)14-16)24-13-5-2-6-22(24)23(11-3-1-4-12-23)19-10-8-17(26)15-21(19)28-24/h7-10,14-15,22,25-27H,1-6,11-13H2		InChI=1S/C24H28O4/c25-16-7-9-18(20(27)14-16)24-13-5-2-6-22(24)23(11-3-1-4-12-23)19-10-8-17(26)15-21(19)28-24/h7-10,14-15,22,25-27H,1-6,11-13H2		TRUE
2309	100.102.462	MS						426-160-5		Omitted undefined stereo in OpenBabel	organic	mono-constituent substance	NONS	Tonnage data confidential			CC(C)=CCCC(C)(OC(=O)CC(=O)C1=CC2=CC=CC=C2C=C1)C=C						CC(=CCCC(C)(C=C)OC(=O)CC(=O)C1=CC2=CC=CC=C2C=C1)C	FALSE		InChI=1S/C23H26O3/c1-5-23(4,14-8-9-17(2)3)26-22(25)16-21(24)20-13-12-18-10-6-7-11-19(18)15-20/h5-7,9-13,15H,1,8,14,16H2,2-4H3		InChI=1S/C23H26O3/c1-5-23(4,14-8-9-17(2)3)26-22(25)16-21(24)20-13-12-18-10-6-7-11-19(18)15-20/h5-7,9-13,15H,1,8,14,16H2,2-4H3		TRUE
8939	100.102.465	FAT 41023						426-190-9		missing cis/trans infomation	organic	mono-constituent substance	NONS	Tonnage data confidential			CC1=C(C#N)C(=O)N(CCCOCCOC2=CC=CC=C2)C(O)=C1N=NC1=C(C=C(Cl)C=C1)N(=O)=O									InChI=1S/C24H22ClN5O6/c1-16-19(15-26)23(31)29(10-5-11-35-12-13-36-18-6-3-2-4-7-18)24(32)22(16)28-27-20-9-8-17(25)14-21(20)30(33)34/h2-4,6-9,14,32H,5,10-13H2,1H3
2322	100.102.468	PHOTOSOL 7-114						426-220-0		Omitted undefined stereo in OpenBabel	organic	mono-constituent substance	NONS	Tonnage data confidential			COC1=CC=C(C=C1)C1(OC2=C3C=C(C)C=CC3=C3C4=C(C=C(C)C=C4)C(C)(O)C3=C2C=C1)C1=CC=C(OC)C=C1						CC1=CC2=C(C=C1)C3=C(C4=C2OC(C=C4)(C5=CC=C(C=C5)OC)C6=CC=C(C=C6)OC)C(C7=C3C=CC(=C7)C)(C)O	FALSE		InChI=1S/C37H32O4/c1-22-6-16-28-31(20-22)35-30(34-33(28)29-17-7-23(2)21-32(29)36(34,3)38)18-19-37(41-35,24-8-12-26(39-4)13-9-24)25-10-14-27(40-5)15-11-25/h6-21,38H,1-5H3		InChI=1S/C37H32O4/c1-22-6-16-28-31(20-22)35-30(34-33(28)29-17-7-23(2)21-32(29)36(34,3)38)18-19-37(41-35,24-8-12-26(39-4)13-9-24)25-10-14-27(40-5)15-11-25/h6-21,38H,1-5H3		TRUE
2328	100.102.469	PHOTOSOL 5-68						426-230-5		Omitted undefined stereo in OpenBabel	organic	mono-constituent substance	NONS	Tonnage data confidential			COC1=CC=C(C=C1C)C1(OC2=C(OC(C)=O)C=C3C=CC=CC3=C2C=C1)C1=C(F)C=CC=C1						CC1=C(C=CC(=C1)C2(C=CC3=C(O2)C(=CC4=CC=CC=C34)OC(=O)C)C5=CC=CC=C5F)OC	FALSE		InChI=1S/C29H23FO4/c1-18-16-21(12-13-26(18)32-3)29(24-10-6-7-11-25(24)30)15-14-23-22-9-5-4-8-20(22)17-27(28(23)34-29)33-19(2)31/h4-17H,1-3H3		InChI=1S/C29H23FO4/c1-18-16-21(12-13-26(18)32-3)29(24-10-6-7-11-25(24)30)15-14-23-22-9-5-4-8-20(22)17-27(28(23)34-29)33-19(2)31/h4-17H,1-3H3		TRUE
2326	100.102.470	PHOTOSOL 7-49						426-240-1		yes	organic	mono-constituent substance	NONS	Tonnage data confidential			COC(=O)C1=C2C=CC(OC2=C2C=CC=CC2=C1OC(C)=O)(C1=CC=C(OC)C=C1)C1=CC=C(OC)C=C1						CC(=O)OC1=C(C2=C(C3=CC=CC=C31)OC(C=C2)(C4=CC=C(C=C4)OC)C5=CC=C(C=C5)OC)C(=O)OC	FALSE		InChI=1S/C31H26O7/c1-19(32)37-29-25-8-6-5-7-24(25)28-26(27(29)30(33)36-4)17-18-31(38-28,20-9-13-22(34-2)14-10-20)21-11-15-23(35-3)16-12-21/h5-18H,1-4H3		InChI=1S/C31H26O7/c1-19(32)37-29-25-8-6-5-7-24(25)28-26(27(29)30(33)36-4)17-18-31(38-28,20-9-13-22(34-2)14-10-20)21-11-15-23(35-3)16-12-21/h5-18H,1-4H3		TRUE
2336	100.102.471	PHOTOSOL 7-106						426-250-4		yes	organic	mono-constituent substance	NONS	Tonnage data confidential			COC(=O)C1=C2C=CC(OC2=C2C=C(OC)C=CC2=C1C1=CC=C(OC)C=C1)(C1=CC=C(OC)C=C1)C1=CC=C(OC)C=C1						COC1=CC=C(C=C1)C2=C(C3=C(C4=C2C=CC(=C4)OC)OC(C=C3)(C5=CC=C(C=C5)OC)C6=CC=C(C=C6)OC)C(=O)OC	FALSE		InChI=1S/C37H32O7/c1-39-26-12-6-23(7-13-26)33-30-19-18-29(42-4)22-32(30)35-31(34(33)36(38)43-5)20-21-37(44-35,24-8-14-27(40-2)15-9-24)25-10-16-28(41-3)17-11-25/h6-22H,1-5H3		InChI=1S/C37H32O7/c1-39-26-12-6-23(7-13-26)33-30-19-18-29(42-4)22-32(30)35-31(34(33)36(38)43-5)20-21-37(44-35,24-8-14-27(40-2)15-9-24)25-10-16-28(41-3)17-11-25/h6-22H,1-5H3		TRUE
2344	100.102.473	Cocoalkyl (4-Oβ-D-galactopyranosyl)-D-gluconamides						426-270-3		Omitted undefined stereo in OpenBabel	organic	mono-constituent substance	NONS	No longer valid			CCCCCCCCCCCCNC(=O)C(O)C(O)C(OC1OC(CO)C(O)C(O)C1O)C(O)CO						CCCCCCCCCCCCNC(=O)C(C(C(C(CO)O)OC1C(C(C(C(O1)CO)O)O)O)O)O	OK		InChI=1S/C24H47NO11/c1-2-3-4-5-6-7-8-9-10-11-12-25-23(34)20(32)19(31)22(15(28)13-26)36-24-21(33)18(30)17(29)16(14-27)35-24/h15-22,24,26-33H,2-14H2,1H3,(H,25,34)		InChI=1S/C24H47NO11/c1-2-3-4-5-6-7-8-9-10-11-12-25-23(34)20(32)19(31)22(15(28)13-26)36-24-21(33)18(30)17(29)16(14-27)35-24/h15-22,24,26-33H,2-14H2,1H3,(H,25,34)		TRUE
8968	100.102.480	NSK-100						426-340-3	93238-03-0	yes	organic	mono-constituent substance	NONS	Tonnage data confidential			CCO[Si](C)(CCCOC(=O)OCCC[Si](C)(OCC)OCC)OCC						CCO[Si](C)(CCCOC(=O)OCCC[Si](C)(OCC)OCC)OCC	TRUE		InChI=1S/C17H38O7Si2/c1-7-21-25(5,22-8-2)15-11-13-19-17(18)20-14-12-16-26(6,23-9-3)24-10-4/h7-16H2,1-6H3		InChI=1S/C17H38O7Si2/c1-7-21-25(5,22-8-2)15-11-13-19-17(18)20-14-12-16-26(6,23-9-3)24-10-4/h7-16H2,1-6H3		TRUE
2382	100.102.491	S-ACID						426-450-1	110311-45-0	yes	organic	mono-constituent substance	NONS	Cease manufacture			CC(C)[C@H](C(O)=O)C1=CC=C(F)C=C1						CC(C)[C@@H](C1=CC=C(C=C1)F)C(=O)O	FALSE		InChI=1S/C11H13FO2/c1-7(2)10(11(13)14)8-3-5-9(12)6-4-8/h3-7,10H,1-2H3,(H,13,14)/t10-/m0/s1		InChI=1S/C11H13FO2/c1-7(2)10(11(13)14)8-3-5-9(12)6-4-8/h3-7,10H,1-2H3,(H,13,14)/t10-/m0/s1		TRUE
2395	100.102.496	R-GLYTO						426-500-2	113826-06-5	yes	organic	mono-constituent substance	NONS	Tonnage data confidential			CC1=CC=C(C=C1)S(=O)(=O)OC[C@H]1CO1			DTXCID2073065	CC1=CC=C(C=C1)S(=O)(=O)OC[C@H]1CO1	TRUE	CC1=CC=C(C=C1)S(=O)(=O)OC[C@H]2CO2	FALSE		InChI=1S/C10H12O4S/c1-8-2-4-10(5-3-8)15(11,12)14-7-9-6-13-9/h2-5,9H,6-7H2,1H3/t9-/m1/s1	InChI=1S/C10H12O4S/c1-8-2-4-10(5-3-8)15(11,12)14-7-9-6-13-9/h2-5,9H,6-7H2,1H3/t9-/m1/s1	InChI=1S/C10H12O4S/c1-8-2-4-10(5-3-8)15(11,12)14-7-9-6-13-9/h2-5,9H,6-7H2,1H3/t9-/m1/s1	TRUE	TRUE	S(OC[C@H]1CO1)(=O)(=O)C2=CC=C(C)C=C2	InChI=1S/C10H12O4S/c1-8-2-4-10(5-3-8)15(11,12)14-7-9-6-13-9/h2-5,9H,6-7H2,1H3/t9-/m1/s1	TRUE
2404	100.102.502	T-405						426-560-1	109995-82-6	yes	organic	mono-constituent substance	NONS	Tonnage data confidential			CCN(CC)C1=CC=C(C=C1)C(=CC=C(C1=CC=CC=C1)C1=CC=CC=C1)C1=CC=C(C=C1)N(CC)CC			DTXCID7033153	CCN(CC)C1=CC=C(C=C1)C(=CC=C(C1=CC=CC=C1)C1=CC=CC=C1)C1=CC=C(C=C1)N(CC)CC	TRUE	CCN(CC)C1=CC=C(C=C1)C(=CC=C(C2=CC=CC=C2)C3=CC=CC=C3)C4=CC=C(C=C4)N(CC)CC	FALSE		InChI=1S/C36H40N2/c1-5-37(6-2)33-23-19-31(20-24-33)36(32-21-25-34(26-22-32)38(7-3)8-4)28-27-35(29-15-11-9-12-16-29)30-17-13-10-14-18-30/h9-28H,5-8H2,1-4H3	InChI=1S/C36H40N2/c1-5-37(6-2)33-23-19-31(20-24-33)36(32-21-25-34(26-22-32)38(7-3)8-4)28-27-35(29-15-11-9-12-16-29)30-17-13-10-14-18-30/h9-28H,5-8H2,1-4H3	InChI=1S/C36H40N2/c1-5-37(6-2)33-23-19-31(20-24-33)36(32-21-25-34(26-22-32)38(7-3)8-4)28-27-35(29-15-11-9-12-16-29)30-17-13-10-14-18-30/h9-28H,5-8H2,1-4H3	TRUE	TRUE	C(=CC=C(C1=CC=CC=C1)C2=CC=CC=C2)(C3=CC=C(N(CC)CC)C=C3)C4=CC=C(N(CC)CC)C=C4	InChI=1S/C36H40N2/c1-5-37(6-2)33-23-19-31(20-24-33)36(32-21-25-34(26-22-32)38(7-3)8-4)28-27-35(29-15-11-9-12-16-29)30-17-13-10-14-18-30/h9-28H,5-8H2,1-4H3	TRUE
2890	100.102.507	INYL						426-610-0	10441-26-6	yes	organic	mono-constituent substance	NONS	Tonnage data confidential			CC(=O)N1C(=CC2=CC=CC=C12)C(O)=O			DTXCID10387713	CC(=O)N1C(=CC2=CC=CC=C12)C(O)=O	TRUE	CC(=O)N1C2=CC=CC=C2C=C1C(=O)O	FALSE		InChI=1S/C11H9NO3/c1-7(13)12-9-5-3-2-4-8(9)6-10(12)11(14)15/h2-6H,1H3,(H,14,15)	InChI=1S/C11H9NO3/c1-7(13)12-9-5-3-2-4-8(9)6-10(12)11(14)15/h2-6H,1H3,(H,14,15)	InChI=1S/C11H9NO3/c1-7(13)12-9-5-3-2-4-8(9)6-10(12)11(14)15/h2-6H,1H3,(H,14,15)	TRUE	TRUE
9327	100.102.509	R,S-INDYL						426-630-1	82923-75-9	Omitted undefined stereo in OpenBabel	organic	mono-constituent substance	NONS	Tonnage data confidential			CC(=O)N1C(CC2=CC=CC=C12)C(O)=O						CC(=O)N1C(CC2=CC=CC=C21)C(=O)O	FALSE		InChI=1S/C11H11NO3/c1-7(13)12-9-5-3-2-4-8(9)6-10(12)11(14)15/h2-5,10H,6H2,1H3,(H,14,15)		InChI=1S/C11H11NO3/c1-7(13)12-9-5-3-2-4-8(9)6-10(12)11(14)15/h2-5,10H,6H2,1H3,(H,14,15)		TRUE
9336	100.102.510	CGX AO 827						426-640-4		yes	organic	mono-constituent substance	NONS	Tonnage data confidential			CC1=C(O)C(=CC(CCC(=O)NCCCCCCNC(=O)CCC2=CC(C)=C(O)C(=C2)C(C)(C)C)=C1)C(C)(C)C						CC1=CC(=CC(=C1O)C(C)(C)C)CCC(=O)NCCCCCCNC(=O)CCC2=CC(=C(C(=C2)C)O)C(C)(C)C	FALSE		InChI=1S/C34H52N2O4/c1-23-19-25(21-27(31(23)39)33(3,4)5)13-15-29(37)35-17-11-9-10-12-18-36-30(38)16-14-26-20-24(2)32(40)28(22-26)34(6,7)8/h19-22,39-40H,9-18H2,1-8H3,(H,35,37)(H,36,38)		InChI=1S/C34H52N2O4/c1-23-19-25(21-27(31(23)39)33(3,4)5)13-15-29(37)35-17-11-9-10-12-18-36-30(38)16-14-26-20-24(2)32(40)28(22-26)34(6,7)8/h19-22,39-40H,9-18H2,1-8H3,(H,35,37)(H,36,38)		TRUE
2883	100.102.512	MBTT						426-660-3	124750-53-4	yes	organic	mono-constituent substance	NONS	No longer valid			CC1=CC=C(C=C1)C1=C(C=CC=C1)C1=NN=NN1C(C1=CC=CC=C1)(C1=CC=CC=C1)C1=CC=CC=C1			DTXCID50387010	CC1=CC=C(C=C1)C1=CC=CC=C1C1=NN=NN1C(C1=CC=CC=C1)(C1=CC=CC=C1)C1=CC=CC=C1	FALSE	CC1=CC=C(C=C1)C2=CC=CC=C2C3=NN=NN3C(C4=CC=CC=C4)(C5=CC=CC=C5)C6=CC=CC=C6	FALSE		InChI=1S/C33H26N4/c1-25-21-23-26(24-22-25)30-19-11-12-20-31(30)32-34-35-36-37(32)33(27-13-5-2-6-14-27,28-15-7-3-8-16-28)29-17-9-4-10-18-29/h2-24H,1H3	InChI=1S/C33H26N4/c1-25-21-23-26(24-22-25)30-19-11-12-20-31(30)32-34-35-36-37(32)33(27-13-5-2-6-14-27,28-15-7-3-8-16-28)29-17-9-4-10-18-29/h2-24H,1H3	InChI=1S/C33H26N4/c1-25-21-23-26(24-22-25)30-19-11-12-20-31(30)32-34-35-36-37(32)33(27-13-5-2-6-14-27,28-15-7-3-8-16-28)29-17-9-4-10-18-29/h2-24H,1H3	TRUE	TRUE
2885	100.102.514	2-(2-Formylaminothiazol-4-yl)-2-oxoethanoic acid						426-680-2	64987-06-0	yes	organic	mono-constituent substance	NONS	Tonnage data confidential	OC(=O)C(=O)C1=CSC(NC=O)=N1		OC(=O)C(=O)C1=CSC(NC=O)=N1			DTXSID70519250	OC(=O)C(=O)C1=CSC(NC=O)=N1	TRUE	C1=C(N=C(S1)NC=O)C(=O)C(=O)O			InChI=1S/C6H4N2O4S/c9-2-7-6-8-3(1-13-6)4(10)5(11)12/h1-2H,(H,11,12)(H,7,8,9)	InChI=1S/C6H4N2O4S/c9-2-7-6-8-3(1-13-6)4(10)5(11)12/h1-2H,(H,11,12)(H,7,8,9)	InChI=1S/C6H4N2O4S/c9-2-7-6-8-3(1-13-6)4(10)5(11)12/h1-2H,(H,11,12)(H,7,8,9)	TRUE	TRUE	C(C(O)=O)(=O)C=1N=C(NC=O)SC1	InChI=1S/C6H4N2O4S/c9-2-7-6-8-3(1-13-6)4(10)5(11)12/h1-2H,(H,11,12)(H,7,8,9)	TRUE
2914	100.102.516	2,5-dichloro-3,6-bis{4-[(2-hydroxyethyl)amino]-3-[(2-hydroxyethyl)sulfonyl]anilino}-1,4-benzoquinone						426-700-1		yes	organic	mono-constituent substance	NONS	Cease manufacture			OCCNC1=C(C=C(NC2=C(Cl)C(=O)C(NC3=CC(=C(NCCO)C=C3)S(=O)(=O)CCO)=C(Cl)C2=O)C=C1)S(=O)(=O)CCO						C1=CC(=C(C=C1NC2=C(C(=O)C(=C(C2=O)Cl)NC3=CC(=C(C=C3)NCCO)S(=O)(=O)CCO)Cl)S(=O)(=O)CCO)NCCO	FALSE		InChI=1S/C26H30Cl2N4O10S2/c27-21-23(31-15-1-3-17(29-5-7-33)19(13-15)43(39,40)11-9-35)25(37)22(28)24(26(21)38)32-16-2-4-18(30-6-8-34)20(14-16)44(41,42)12-10-36/h1-4,13-14,29-36H,5-12H2		InChI=1S/C26H30Cl2N4O10S2/c27-21-23(31-15-1-3-17(29-5-7-33)19(13-15)43(39,40)11-9-35)25(37)22(28)24(26(21)38)32-16-2-4-18(30-6-8-34)20(14-16)44(41,42)12-10-36/h1-4,13-14,29-36H,5-12H2		TRUE
2919	100.102.517	HSR-2310						426-710-4		missing cis/trans infomation	organic	mono-constituent substance	NONS	Tonnage data confidential			CC(C)CN(CC(C)C)C1=CC=C(N=NC2=NC3=CC=C(Cl)C=C3S2)C(C)=C1						CC1=C(C=CC(=C1)N(CC(C)C)CC(C)C)N=NC2=NC3=C(S2)C=C(C=C3)Cl	FALSE		InChI=1S/C22H27ClN4S/c1-14(2)12-27(13-15(3)4)18-7-9-19(16(5)10-18)25-26-22-24-20-8-6-17(23)11-21(20)28-22/h6-11,14-15H,12-13H2,1-5H3		InChI=1S/C22H27ClN4S/c1-14(2)12-27(13-15(3)4)18-7-9-19(16(5)10-18)25-26-22-24-20-8-6-17(23)11-21(20)28-22/h6-11,14-15H,12-13H2,1-5H3		TRUE
8437	100.102.518	ODB-7						426-720-9	151019-95-3	Omitted undefined stereo in OpenBabel	organic	mono-constituent substance	NONS	Tonnage data confidential			CCN(CC)C1=CC=C2C(OC3=C(C=C(NC4=CC(C)=CC=C4)C(C)=C3)C22OC(=O)C3=C2C=CC=C3)=C1			DTXCID301028276	CCN(CC)C1=CC2=C(C=C1)C1(OC(=O)C3=C1C=CC=C3)C1=C(O2)C=C(C)C(NC2=CC=CC(C)=C2)=C1	FALSE	CCN(CC)C1=CC2=C(C=C1)C3(C4=CC=CC=C4C(=O)O3)C5=C(O2)C=C(C(=C5)NC6=CC=CC(=C6)C)C	FALSE		InChI=1S/C32H30N2O3/c1-5-34(6-2)23-14-15-26-30(18-23)36-29-17-21(4)28(33-22-11-9-10-20(3)16-22)19-27(29)32(26)25-13-8-7-12-24(25)31(35)37-32/h7-19,33H,5-6H2,1-4H3	InChI=1S/C32H30N2O3/c1-5-34(6-2)23-14-15-26-30(18-23)36-29-17-21(4)28(33-22-11-9-10-20(3)16-22)19-27(29)32(26)25-13-8-7-12-24(25)31(35)37-32/h7-19,33H,5-6H2,1-4H3	InChI=1S/C32H30N2O3/c1-5-34(6-2)23-14-15-26-30(18-23)36-29-17-21(4)28(33-22-11-9-10-20(3)16-22)19-27(29)32(26)25-13-8-7-12-24(25)31(35)37-32/h7-19,33H,5-6H2,1-4H3	TRUE	TRUE	O=C1OC2(C=3C(OC=4C2=CC=C(N(CC)CC)C4)=CC(C)=C(NC5=CC(C)=CC=C5)C3)C=6C1=CC=CC6	InChI=1S/C32H30N2O3/c1-5-34(6-2)23-14-15-26-30(18-23)36-29-17-21(4)28(33-22-11-9-10-20(3)16-22)19-27(29)32(26)25-13-8-7-12-24(25)31(35)37-32/h7-19,33H,5-6H2,1-4H3	TRUE
2911	100.102.523	V159456						426-780-6	152087-61-1	yes	organic	mono-constituent substance	NONS	Tonnage data confidential			CC1(CC=C)C(=C(C#N)C#N)C2=CC=CC=C2C1=C(C#N)C#N			DTXCID60543968	CC1(CC=C)C(=C(C#N)C#N)C2=CC=CC=C2C1=C(C#N)C#N	TRUE	CC1(C(=C(C#N)C#N)C2=CC=CC=C2C1=C(C#N)C#N)CC=C	FALSE		InChI=1S/C19H12N4/c1-3-8-19(2)17(13(9-20)10-21)15-6-4-5-7-16(15)18(19)14(11-22)12-23/h3-7H,1,8H2,2H3	InChI=1S/C19H12N4/c1-3-8-19(2)17(13(9-20)10-21)15-6-4-5-7-16(15)18(19)14(11-22)12-23/h3-7H,1,8H2,2H3	InChI=1S/C19H12N4/c1-3-8-19(2)17(13(9-20)10-21)15-6-4-5-7-16(15)18(19)14(11-22)12-23/h3-7H,1,8H2,2H3	TRUE	TRUE
2912	100.102.525	Diethyl thiophosphoryl (Z)-(2-aminothiazol-4-yl)-2-(tert-butoxycarbonyl)methoxyimino acetate						426-800-3		yes	organic	mono-constituent substance	NONS	Tonnage data confidential			CCOP(=S)(OCC)OC(=O)C(=N/OCC(=O)OC(C)(C)C)\C1=CSC(N)=N1						CCOP(=S)(OCC)OC(=O)/C(=N\OCC(=O)OC(C)(C)C)/C1=CSC(=N1)N	OK		InChI=1S/C15H24N3O7PS2/c1-6-22-26(27,23-7-2)25-13(20)12(10-9-28-14(16)17-10)18-21-8-11(19)24-15(3,4)5/h9H,6-8H2,1-5H3,(H2,16,17)/b18-12-		InChI=1S/C15H24N3O7PS2/c1-6-22-26(27,23-7-2)25-13(20)12(10-9-28-14(16)17-10)18-21-8-11(19)24-15(3,4)5/h9H,6-8H2,1-5H3,(H2,16,17)/b18-12-		TRUE
2971	100.102.536	P1						426-910-1	148077-51-4	yes	organic	mono-constituent substance	NONS	Tonnage data confidential			CC1(C)C2=CC=CC=C2C2=C1C=C(C=C2)N(C1=CC=CC=C1)C1=CC=CC=C1			DTXCID80521162	CC1(C)C2=CC=CC=C2C2=C1C=C(C=C2)N(C1=CC=CC=C1)C1=CC=CC=C1	TRUE	CC1(C2=CC=CC=C2C3=C1C=C(C=C3)N(C4=CC=CC=C4)C5=CC=CC=C5)C	FALSE		InChI=1S/C27H23N/c1-27(2)25-16-10-9-15-23(25)24-18-17-22(19-26(24)27)28(20-11-5-3-6-12-20)21-13-7-4-8-14-21/h3-19H,1-2H3	InChI=1S/C27H23N/c1-27(2)25-16-10-9-15-23(25)24-18-17-22(19-26(24)27)28(20-11-5-3-6-12-20)21-13-7-4-8-14-21/h3-19H,1-2H3	InChI=1S/C27H23N/c1-27(2)25-16-10-9-15-23(25)24-18-17-22(19-26(24)27)28(20-11-5-3-6-12-20)21-13-7-4-8-14-21/h3-19H,1-2H3	TRUE	TRUE
2977	100.102.545	T-188						427-010-1		missing cis/trans infomation	organic	mono-constituent substance	NONS	Tonnage data confidential			[N-]=[N+]=C1C=CC2=C(C=CC=C2S(=O)(=O)OC2=CC(OS(=O)(=O)C3=CC=CC4=C3C=CC(=[N+]=[N-])C4=O)=C(C=C2)C23CCCCC2C2(CCCCC2)C2=CC=C(OS(=O)(=O)C4=CC=CC5=C4C=CC(=[N+]=[N-])C5=O)C=C2O3)C1=O									InChI=1S/C54H40N6O13S3/c55-58-41-23-18-33-36(50(41)61)9-6-12-46(33)74(64,65)71-31-16-21-39-44(29-31)70-54(28-5-2-15-49(54)53(39)26-3-1-4-27-53)40-22-17-32(72-75(66,67)47-13-7-10-37-34(47)19-24-42(59-56)51(37)62)30-45(40)73-76(68,69)48-14-8-11-38-35(48)20-25-43(60-57)52(38)63/h6-14,16-25,29-30,49H,1-5,15,26-28H2
3012	100.102.547	branched, octyl 3-[3,5-di(tert-butyl)-4-hydroxyphenyl]propanoate						427-030-0	13417-12-4	yes	organic	mono-constituent substance	NONS	Tonnage data confidential			CCCCCCCCOC(=O)CCC1=CC(=C(O)C(=C1)C(C)(C)C)C(C)(C)C			DTXCID70196484	CCCCCCCCOC(=O)CCC1=CC(=C(O)C(=C1)C(C)(C)C)C(C)(C)C	TRUE	CCCCCCCCOC(=O)CCC1=CC(=C(C(=C1)C(C)(C)C)O)C(C)(C)C	FALSE		InChI=1S/C25H42O3/c1-8-9-10-11-12-13-16-28-22(26)15-14-19-17-20(24(2,3)4)23(27)21(18-19)25(5,6)7/h17-18,27H,8-16H2,1-7H3	InChI=1S/C25H42O3/c1-8-9-10-11-12-13-16-28-22(26)15-14-19-17-20(24(2,3)4)23(27)21(18-19)25(5,6)7/h17-18,27H,8-16H2,1-7H3	InChI=1S/C25H42O3/c1-8-9-10-11-12-13-16-28-22(26)15-14-19-17-20(24(2,3)4)23(27)21(18-19)25(5,6)7/h17-18,27H,8-16H2,1-7H3	TRUE	TRUE
4409	100.102.560	UK-348,954						427-160-8		yes	organic	mono-constituent substance	NONS	Tonnage data confidential			CCCOC1=C(C=C(C=C1)S(=O)(=O)N1CCN(CC)CC1)C(O)=O						CCCOC1=C(C=C(C=C1)S(=O)(=O)N2CCN(CC2)CC)C(=O)O	FALSE		InChI=1S/C16H24N2O5S/c1-3-11-23-15-6-5-13(12-14(15)16(19)20)24(21,22)18-9-7-17(4-2)8-10-18/h5-6,12H,3-4,7-11H2,1-2H3,(H,19,20)		InChI=1S/C16H24N2O5S/c1-3-11-23-15-6-5-13(12-14(15)16(19)20)24(21,22)18-9-7-17(4-2)8-10-18/h5-6,12H,3-4,7-11H2,1-2H3,(H,19,20)		TRUE
4417	100.102.561	UK-292,681						427-170-2	192869-02-6	yes	organic	mono-constituent substance	NONS	Tonnage data confidential			CC(=O)N1CCCN(CC1)C(=O)N1CCOCC1						CC(=O)N1CCCN(CC1)C(=O)N2CCOCC2	FALSE		InChI=1S/C12H21N3O3/c1-11(16)13-3-2-4-14(6-5-13)12(17)15-7-9-18-10-8-15/h2-10H2,1H3		InChI=1S/C12H21N3O3/c1-11(16)13-3-2-4-14(6-5-13)12(17)15-7-9-18-10-8-15/h2-10H2,1H3		TRUE
9464	100.102.569	BXDA						427-250-7	36310-05-1	yes	organic	mono-constituent substance	NONS	Tonnage data confidential			O=C1OC(=O)C2=C3C1=CC=C1OC4=C(C=CC=C4)C(C=C2)=C31			DTXCID80410385	O=C1OC(=O)C2=C3C1=CC=C1OC4=CC=CC=C4C(C=C2)=C31	FALSE	C1=CC=C2C(=C1)C3=C4C(=CC=C5C4=C(C=C3)C(=O)OC5=O)O2	FALSE		InChI=1S/C18H8O4/c19-17-11-6-5-10-9-3-1-2-4-13(9)21-14-8-7-12(18(20)22-17)15(11)16(10)14/h1-8H	InChI=1S/C18H8O4/c19-17-11-6-5-10-9-3-1-2-4-13(9)21-14-8-7-12(18(20)22-17)15(11)16(10)14/h1-8H	InChI=1S/C18H8O4/c19-17-11-6-5-10-9-3-1-2-4-13(9)21-14-8-7-12(18(20)22-17)15(11)16(10)14/h1-8H	TRUE	TRUE	O=C1C=2C3=C4C(C=5C(OC4=CC=C3C(=O)O1)=CC=CC5)=CC2	InChI=1S/C18H8O4/c19-17-11-6-5-10-9-3-1-2-4-13(9)21-14-8-7-12(18(20)22-17)15(11)16(10)14/h1-8H	TRUE
4448	100.102.573	BRD303						427-290-5		missing cis/trans infomation	organic	mono-constituent substance	NONS	Tonnage data confidential			CC[NH+](CC)CCCNC1=NC(N)=NC(NC2=CC=C(C=CC3=C(C(NC4=NC(NCCC[NH+](CC)CC)=NC(N)=N4)=CC=C3)S([O-])(=O)=O)C(=C2)S([O-])(=O)=O)=N1									InChI=1S/C34H50N14O6S2/c1-5-47(6-2)20-10-18-37-31-41-29(35)43-33(45-31)39-25-17-16-23(27(22-25)55(49,50)51)14-15-24-12-9-13-26(28(24)56(52,53)54)40-34-44-30(36)42-32(46-34)38-19-11-21-48(7-3)8-4/h9,12-17,22H,5-8,10-11,18-21H2,1-4H3,(H,49,50,51)(H,52,53,54)(H4,35,37,39,41,43,45)(H4,36,38,40,42,44,46)
8407	100.102.590	EPIDEMETHYLPODOPHYLLOTOXIN						427-460-9	6559-91-7	yes	organic	mono-constituent substance	NONS	Tonnage data confidential			[H][C@]12COC(=O)[C@]1([H])[C@H](C1=CC(OC)=C(O)C(OC)=C1)C1=C(C=C3OCOC3=C1)[C@H]2O			DTXCID0028668	COC1=CC(=CC(OC)=C1O)[C@H]1[C@@H]2[C@H](COC2=O)[C@H](O)C2=CC3=C(OCO3)C=C12	FALSE	COC1=CC(=CC(=C1O)OC)[C@H]2[C@@H]3[C@H](COC3=O)[C@@H](C4=CC5=C(C=C24)OCO5)O	FALSE		InChI=1S/C21H20O8/c1-25-15-3-9(4-16(26-2)20(15)23)17-10-5-13-14(29-8-28-13)6-11(10)19(22)12-7-27-21(24)18(12)17/h3-6,12,17-19,22-23H,7-8H2,1-2H3/t12-,17+,18-,19+/m0/s1	InChI=1S/C21H20O8/c1-25-15-3-9(4-16(26-2)20(15)23)17-10-5-13-14(29-8-28-13)6-11(10)19(22)12-7-27-21(24)18(12)17/h3-6,12,17-19,22-23H,7-8H2,1-2H3/t12-,17+,18-,19+/m0/s1	InChI=1S/C21H20O8/c1-25-15-3-9(4-16(26-2)20(15)23)17-10-5-13-14(29-8-28-13)6-11(10)19(22)12-7-27-21(24)18(12)17/h3-6,12,17-19,22-23H,7-8H2,1-2H3/t12-,17+,18-,19+/m0/s1	TRUE	TRUE	O=C1[C@@]2([C@@](C=3C([C@@H](O)[C@]2(CO1)[H])=CC4=C(C3)OCO4)(C5=CC(OC)=C(O)C(OC)=C5)[H])[H]	InChI=1S/C21H20O8/c1-25-15-3-9(4-16(26-2)20(15)23)17-10-5-13-14(29-8-28-13)6-11(10)19(22)12-7-27-21(24)18(12)17/h3-6,12,17-19,22-23H,7-8H2,1-2H3/t12-,17+,18-,19+/m0/s1	TRUE
4502	100.102.594	OEH 5612						427-500-5		Omitted undefined stereo in OpenBabel	organic	mono-constituent substance	NONS	Cease manufacture			CCCCC(CC)COCCCNC1=CC(CC(C)(C)C1)=C(C#N)C#N						CCCCC(CC)COCCCNC1=CC(=C(C#N)C#N)CC(C1)(C)C	FALSE		InChI=1S/C22H35N3O/c1-5-7-9-18(6-2)17-26-11-8-10-25-21-12-19(20(15-23)16-24)13-22(3,4)14-21/h12,18,25H,5-11,13-14,17H2,1-4H3		InChI=1S/C22H35N3O/c1-5-7-9-18(6-2)17-26-11-8-10-25-21-12-19(20(15-23)16-24)13-22(3,4)14-21/h12,18,25H,5-11,13-14,17H2,1-4H3		TRUE
9517	100.102.596	(1-3)PEPTIDE						427-530-9		yes	organic	mono-constituent substance	NONS	Tonnage data confidential			NC(=N)NCCCC[C@H](NC(=O)CCSC(C1=CC=CC=C1)(C1=CC=CC=C1)C1=CC=CC=C1)C(=O)NCC(O)=O									InChI=1S/C31H37N5O4S/c32-30(33)34-20-11-10-18-26(29(40)35-22-28(38)39)36-27(37)19-21-41-31(23-12-4-1-5-13-23,24-14-6-2-7-15-24)25-16-8-3-9-17-25/h1-9,12-17,26H,10-11,18-22H2,(H,35,40)(H,36,37)(H,38,39)(H4,32,33,34)/t26-/m0/s1
8424	100.102.597	(4-6) PEPTIDE						427-550-8		Omitted undefined stereo in OpenBabel	organic	mono-constituent substance	NONS	Tonnage data confidential			CC(C)(C)OC(=O)CC(N)C(=O)NC(CC1=CNC2=C1C=CC=C2)C(=O)N1CCCC1C(O)=O									InChI=1S/C24H32N4O6/c1-24(2,3)34-20(29)12-16(25)21(30)27-18(22(31)28-10-6-9-19(28)23(32)33)11-14-13-26-17-8-5-4-7-15(14)17/h4-5,7-8,13,16,18-19,26H,6,9-12,25H2,1-3H3,(H,27,30)(H,32,33)
9520	100.102.598	SIERRA YELLOW						427-560-2	35773-44-5	yes	organic	mono-constituent substance	NONS	Tonnage data confidential			CCN(CC)C1=CC=C2C=C(C3=NC4=C(O3)C=CC(=C4)S(=O)(=O)N(C)C)C(=O)OC2=C1			DTXCID7039090	CCN(CC)C1=CC=C2C=C(C3=NC4=CC(=CC=C4O3)S(=O)(=O)N(C)C)C(=O)OC2=C1	FALSE	CCN(CC)C1=CC2=C(C=C1)C=C(C(=O)O2)C3=NC4=C(O3)C=CC(=C4)S(=O)(=O)N(C)C	FALSE		InChI=1S/C22H23N3O5S/c1-5-25(6-2)15-8-7-14-11-17(22(26)30-20(14)12-15)21-23-18-13-16(9-10-19(18)29-21)31(27,28)24(3)4/h7-13H,5-6H2,1-4H3	InChI=1S/C22H23N3O5S/c1-5-25(6-2)15-8-7-14-11-17(22(26)30-20(14)12-15)21-23-18-13-16(9-10-19(18)29-21)31(27,28)24(3)4/h7-13H,5-6H2,1-4H3	InChI=1S/C22H23N3O5S/c1-5-25(6-2)15-8-7-14-11-17(22(26)30-20(14)12-15)21-23-18-13-16(9-10-19(18)29-21)31(27,28)24(3)4/h7-13H,5-6H2,1-4H3	TRUE	TRUE	O=C1C(=CC=2C(O1)=CC(N(CC)CC)=CC2)C3=NC=4C(O3)=CC=C(S(N(C)C)(=O)=O)C4	InChI=1S/C22H23N3O5S/c1-5-25(6-2)15-8-7-14-11-17(22(26)30-20(14)12-15)21-23-18-13-16(9-10-19(18)29-21)31(27,28)24(3)4/h7-13H,5-6H2,1-4H3	TRUE
4958	100.102.608	LICORIS						427-660-6	60770-00-5	yes	organic	mono-constituent substance	NONS	Cease manufacture			CCOC(=O)C1=C(O)C=C(C)C=C1			DTXCID5042877	CCOC(=O)C1=C(O)C=C(C)C=C1	TRUE	CCOC(=O)C1=C(C=C(C=C1)C)O	FALSE		InChI=1S/C10H12O3/c1-3-13-10(12)8-5-4-7(2)6-9(8)11/h4-6,11H,3H2,1-2H3	InChI=1S/C10H12O3/c1-3-13-10(12)8-5-4-7(2)6-9(8)11/h4-6,11H,3H2,1-2H3	InChI=1S/C10H12O3/c1-3-13-10(12)8-5-4-7(2)6-9(8)11/h4-6,11H,3H2,1-2H3	TRUE	TRUE	C(OCC)(=O)C1=C(O)C=C(C)C=C1	InChI=1S/C10H12O3/c1-3-13-10(12)8-5-4-7(2)6-9(8)11/h4-6,11H,3H2,1-2H3	TRUE
9812	100.102.609	NO. 701 BASE						427-670-0		yes	organic	mono-constituent substance	FULL	≥ 1 tonnes			CCCCN(CCCC)CCCNC1=NC(NC2=CC=C(N)C=C2)=NC(O)=N1						CCCCN(CCCC)CCCNC1=NC(=O)N=C(N1)NC2=CC=C(C=C2)N	FALSE		InChI=1S/C20H33N7O/c1-3-5-13-27(14-6-4-2)15-7-12-22-18-24-19(26-20(28)25-18)23-17-10-8-16(21)9-11-17/h8-11H,3-7,12-15,21H2,1-2H3,(H3,22,23,24,25,26,28)		InChI=1S/C20H33N7O/c1-3-5-13-27(14-6-4-2)15-7-12-22-18-24-19(26-20(28)25-18)23-17-10-8-16(21)9-11-17/h8-11H,3-7,12-15,21H2,1-2H3,(H3,22,23,24,25,26,28)		TRUE
12992	100.102.624	TERON N-718K						427-830-1		missing cis/trans infomation	organic	mono-constituent substance	NONS	Tonnage data confidential			CCCCCCC1C=CC(CCCCCCCC(=O)NCCCCCCNC(=O)CCCCCCCC2C=CC(CCCCCC)C(CC=CCCCCC)C2CCCCCCCC(O)=O)C(CCCCCCCC(O)=O)C1CC=CCCCCC									InChI=1S/C78H140N2O6/c1-5-9-13-17-25-39-53-71-67(49-35-15-11-7-3)61-63-69(73(71)55-41-27-21-31-45-59-77(83)84)51-37-23-19-29-43-57-75(81)79-65-47-33-34-48-66-80-76(82)58-44-30-20-24-38-52-70-64-62-68(50-36-16-12-8-4)72(54-40-26-18-14-10-6-2)74(70)56-42-28-22-32-46-60-78(85)86/h25-26,39-40,61-64,67-74H,5-24,27-38,41-60,65-66H2,1-4H3,(H,79,81)(H,80,82)(H,83,84)(H,85,86)
5013	100.102.631	QXIE						427-920-9		Omitted undefined stereo in OpenBabel	organic	mono-constituent substance	NONS	Tonnage data confidential			[H]C(CC(CC(CCCCC)C1=CC=C(O)C=C1)C1=CC=C(OC(C)C)C=C1)C1=CC=C(OC(C)OCC)C=C1									InChI=1S/C35H48O4/c1-6-8-9-10-31(29-15-19-33(36)20-16-29)25-32(30-17-23-34(24-18-30)38-26(3)4)14-11-28-12-21-35(22-13-28)39-27(5)37-7-2/h12-13,15-24,26-27,31-32,36H,6-11,14,25H2,1-5H3
4992	100.102.633	MPR(TRT)OSU						427-940-8	129431-12-5	yes	organic	mono-constituent substance	NONS	Tonnage data confidential			O=C(CCSC(C1=CC=CC=C1)(C1=CC=CC=C1)C1=CC=CC=C1)ON1C(=O)CCC1=O			DTXCID50542420	O=C(CCSC(C1=CC=CC=C1)(C1=CC=CC=C1)C1=CC=CC=C1)ON1C(=O)CCC1=O	TRUE	C1CC(=O)N(C1=O)OC(=O)CCSC(C2=CC=CC=C2)(C3=CC=CC=C3)C4=CC=CC=C4	FALSE		InChI=1S/C26H23NO4S/c28-23-16-17-24(29)27(23)31-25(30)18-19-32-26(20-10-4-1-5-11-20,21-12-6-2-7-13-21)22-14-8-3-9-15-22/h1-15H,16-19H2	InChI=1S/C26H23NO4S/c28-23-16-17-24(29)27(23)31-25(30)18-19-32-26(20-10-4-1-5-11-20,21-12-6-2-7-13-21)22-14-8-3-9-15-22/h1-15H,16-19H2	InChI=1S/C26H23NO4S/c28-23-16-17-24(29)27(23)31-25(30)18-19-32-26(20-10-4-1-5-11-20,21-12-6-2-7-13-21)22-14-8-3-9-15-22/h1-15H,16-19H2	TRUE	TRUE
5027	100.102.636	BAC-E						427-970-1	114391-97-8	missing cis/trans infomation	organic	mono-constituent substance	NONS	Tonnage data confidential			CCC1CC(=CC2=CC=C(C=C2)N=[N+]=[N-])C(=O)C(C1)=CC1=CC=C(C=C1)N=[N+]=[N-]			DTXCID101028137	CCC1CC(=CC2=CC=C(C=C2)N=[N+]=[N-])C(=O)C(C1)=CC1=CC=C(C=C1)N=[N+]=[N-]	TRUE	CCC1C/C(=C\C2=CC=C(C=C2)N=[N+]=[N-])/C(=O)/C(=C/C3=CC=C(C=C3)N=[N+]=[N-])/C1	FALSE		InChI=1S/C22H20N6O/c1-2-15-11-18(13-16-3-7-20(8-4-16)25-27-23)22(29)19(12-15)14-17-5-9-21(10-6-17)26-28-24/h3-10,13-15H,2,11-12H2,1H3	InChI=1S/C22H20N6O/c1-2-15-11-18(13-16-3-7-20(8-4-16)25-27-23)22(29)19(12-15)14-17-5-9-21(10-6-17)26-28-24/h3-10,13-15H,2,11-12H2,1H3	InChI=1S/C22H20N6O/c1-2-15-11-18(13-16-3-7-20(8-4-16)25-27-23)22(29)19(12-15)14-17-5-9-21(10-6-17)26-28-24/h3-10,13-15H,2,11-12H2,1H3/b18-13+,19-14+	TRUE	FALSE	C(=C1C(=O)C(=CC2=CC=C(N=[N+]=[N-])C=C2)CC(CC)C1)C3=CC=C(N=[N+]=[N-])C=C3	InChI=1S/C22H20N6O/c1-2-15-11-18(13-16-3-7-20(8-4-16)25-27-23)22(29)19(12-15)14-17-5-9-21(10-6-17)26-28-24/h3-10,13-15H,2,11-12H2,1H3	TRUE
9876	100.102.637	PES						427-980-6		polymer	organic	mono-constituent substance	NONS	Tonnage data confidential			CCOC(C)OC1=CC=C(C=C1)C(C[Xe])CC([Xe])C1=CC=C(O)C=C1								probably a polymer
5031	100.102.638	CP-603,980						427-990-0	102029-44-7	yes	organic	mono-constituent substance	NONS	Tonnage data confidential			O=C1N[C@H](CC2=CC=CC=C2)CO1			DTXCID20321628	O=C1N[C@H](CC2=CC=CC=C2)CO1	TRUE	C1[C@H](NC(=O)O1)CC2=CC=CC=C2	FALSE		InChI=1S/C10H11NO2/c12-10-11-9(7-13-10)6-8-4-2-1-3-5-8/h1-5,9H,6-7H2,(H,11,12)/t9-/m1/s1	InChI=1S/C10H11NO2/c12-10-11-9(7-13-10)6-8-4-2-1-3-5-8/h1-5,9H,6-7H2,(H,11,12)/t9-/m1/s1	InChI=1S/C10H11NO2/c12-10-11-9(7-13-10)6-8-4-2-1-3-5-8/h1-5,9H,6-7H2,(H,11,12)/t9-/m1/s1	TRUE	TRUE	C([C@@H]1COC(=O)N1)C2=CC=CC=C2	InChI=1S/C10H11NO2/c12-10-11-9(7-13-10)6-8-4-2-1-3-5-8/h1-5,9H,6-7H2,(H,11,12)/t9-/m1/s1	TRUE
8459	100.102.647	1-({[(7,7-dimethyl-2-oxobicyclo[2.2.1]heptan-1-yl)methyl]sulfonyl}oxy)pyrrolidine-2,5-dione						428-080-6		Omitted undefined stereo in OpenBabel	organic	mono-constituent substance	NONS	Tonnage data confidential			CC1(C)C2CCC1(CS(=O)(=O)ON1C(=O)CCC1=O)C(=O)C2						CC1(C2CCC1(C(=O)C2)CS(=O)(=O)ON3C(=O)CCC3=O)C	FALSE		InChI=1S/C14H19NO6S/c1-13(2)9-5-6-14(13,10(16)7-9)8-22(19,20)21-15-11(17)3-4-12(15)18/h9H,3-8H2,1-2H3		InChI=1S/C14H19NO6S/c1-13(2)9-5-6-14(13,10(16)7-9)8-22(19,20)21-15-11(17)3-4-12(15)18/h9H,3-8H2,1-2H3		TRUE
9909	100.102.648	QXZE						428-090-0		Omitted undefined stereo in OpenBabel	organic	mono-constituent substance	NONS	Tonnage data confidential			[H]C(CC(CC(CCCCC)C1=CC=C(O)C=C1)C1=CC=C(OC(=O)C2=CC=CC=C2)C=C1)C1=CC=C(OC(C)OCC)C=C1									InChI=1S/C39H46O5/c1-4-6-8-13-34(31-18-22-36(40)23-19-31)28-35(17-14-30-15-24-37(25-16-30)43-29(3)42-5-2)32-20-26-38(27-21-32)44-39(41)33-11-9-7-10-12-33/h7,9-12,15-16,18-27,29,34-35,40H,4-6,8,13-14,17,28H2,1-3H3
9906	100.102.655	JASMONITRILE						428-160-0	208041-98-9	Omitted undefined stereo in OpenBabel	organic	mono-constituent substance	NONS	Tonnage data confidential			CCCCCC(CCC)C#N			DTXCID1029960	CCCCCC(CCC)C#N	TRUE	CCCCCC(CCC)C#N	TRUE		InChI=1S/C10H19N/c1-3-5-6-8-10(9-11)7-4-2/h10H,3-8H2,1-2H3	InChI=1S/C10H19N/c1-3-5-6-8-10(9-11)7-4-2/h10H,3-8H2,1-2H3	InChI=1S/C10H19N/c1-3-5-6-8-10(9-11)7-4-2/h10H,3-8H2,1-2H3	TRUE	TRUE	C(CCCCC)(CCC)C#N	InChI=1S/C10H19N/c1-3-5-6-8-10(9-11)7-4-2/h10H,3-8H2,1-2H3	TRUE
5095	100.102.660	OM-77						428-220-6		yes	organic	mono-constituent substance	NONS	Tonnage data confidential			COC1=CC(=C(C#N)C#N)C(OC)=CC1=C(C#N)C#N						COC1=CC(=C(C#N)C#N)C(=CC1=C(C#N)C#N)OC	FALSE		InChI=1S/C14H8N4O2/c1-19-13-3-12(10(7-17)8-18)14(20-2)4-11(13)9(5-15)6-16/h3-4H,1-2H3		InChI=1S/C14H8N4O2/c1-19-13-3-12(10(7-17)8-18)14(20-2)4-11(13)9(5-15)6-16/h3-4H,1-2H3		TRUE
5106	100.102.666	IMID						428-280-3	76746-95-7	yes	organic	mono-constituent substance	NONS	Cease manufacture			COC1=CC2=C(CC(=O)N(C)C2=O)C=C1						CN1C(=O)CC2=C(C1=O)C=C(C=C2)OC	FALSE		InChI=1S/C11H11NO3/c1-12-10(13)5-7-3-4-8(15-2)6-9(7)11(12)14/h3-4,6H,5H2,1-2H3		InChI=1S/C11H11NO3/c1-12-10(13)5-7-3-4-8(15-2)6-9(7)11(12)14/h3-4,6H,5H2,1-2H3		TRUE	O=C1C=2C(CC(=O)N1C)=CC=C(OC)C2	InChI=1S/C11H11NO3/c1-12-10(13)5-7-3-4-8(15-2)6-9(7)11(12)14/h3-4,6H,5H2,1-2H3	TRUE
9965	100.102.675	LMB 6123						428-370-2	147876-34-4	Omitted undefined stereo in OpenBabel	organic	mono-constituent substance	NONS	Tonnage data confidential			O=C1OCC(CN2C(=O)N(CC3COC(=O)O3)C(=O)N(CC3COC(=O)O3)C2=O)O1						C1C(OC(=O)O1)CN2C(=O)N(C(=O)N(C2=O)CC3COC(=O)O3)CC4COC(=O)O4	FALSE		InChI=1S/C15H15N3O12/c19-10-16(1-7-4-25-13(22)28-7)11(20)18(3-9-6-27-15(24)30-9)12(21)17(10)2-8-5-26-14(23)29-8/h7-9H,1-6H2		InChI=1S/C15H15N3O12/c19-10-16(1-7-4-25-13(22)28-7)11(20)18(3-9-6-27-15(24)30-9)12(21)17(10)2-8-5-26-14(23)29-8/h7-9H,1-6H2		TRUE
9969	100.102.676	PHOTOSOL 5-3						428-380-7	4222-20-2	yes	organic	mono-constituent substance	NONS	Tonnage data confidential			O1C2=C(C=CC1(C1=CC=CC=C1)C1=CC=CC=C1)C1=C(C=CC=C1)C=C2			DTXCID8040064	O1C2=CC=C3C=CC=CC3=C2C=CC1(C1=CC=CC=C1)C1=CC=CC=C1	FALSE	C1=CC=C(C=C1)C2(C=CC3=C(O2)C=CC4=CC=CC=C43)C5=CC=CC=C5	FALSE		InChI=1S/C25H18O/c1-3-10-20(11-4-1)25(21-12-5-2-6-13-21)18-17-23-22-14-8-7-9-19(22)15-16-24(23)26-25/h1-18H	InChI=1S/C25H18O/c1-3-10-20(11-4-1)25(21-12-5-2-6-13-21)18-17-23-22-14-8-7-9-19(22)15-16-24(23)26-25/h1-18H	InChI=1S/C25H18O/c1-3-10-20(11-4-1)25(21-12-5-2-6-13-21)18-17-23-22-14-8-7-9-19(22)15-16-24(23)26-25/h1-18H	TRUE	TRUE	C1(OC=2C(C=C1)=C3C(=CC2)C=CC=C3)(C4=CC=CC=C4)C5=CC=CC=C5	InChI=1S/C25H18O/c1-3-10-20(11-4-1)25(21-12-5-2-6-13-21)18-17-23-22-14-8-7-9-19(22)15-16-24(23)26-25/h1-18H	TRUE
12848	100.102.681	Benzly (S)-N-(1-oxopentyl)-N-((2'-(1H-tetrazole-5-yl)-1, 1'-biphenyl-4-yl)methyl)-L-valinate						428-430-8	137863-20-8	yes	organic	mono-constituent substance	NONS	Tonnage data confidential			CCCCC(=O)N(CC1=CC=C(C=C1)C1=C(C=CC=C1)C1=NN=NN1)[C@@H](C(C)C)C(=O)OCC1=CC=CC=C1			DTXCID3082833	CCCCC(=O)N(CC1=CC=C(C=C1)C1=CC=CC=C1C1=NNN=N1)[C@@H](C(C)C)C(=O)OCC1=CC=CC=C1	OK	CCCCC(=O)N(CC1=CC=C(C=C1)C2=CC=CC=C2C3=NNN=N3)[C@@H](C(C)C)C(=O)OCC4=CC=CC=C4	OK		InChI=1S/C31H35N5O3/c1-4-5-15-28(37)36(29(22(2)3)31(38)39-21-24-11-7-6-8-12-24)20-23-16-18-25(19-17-23)26-13-9-10-14-27(26)30-32-34-35-33-30/h6-14,16-19,22,29H,4-5,15,20-21H2,1-3H3,(H,32,33,34,35)/t29-/m0/s1	InChI=1S/C31H35N5O3/c1-4-5-15-28(37)36(29(22(2)3)31(38)39-21-24-11-7-6-8-12-24)20-23-16-18-25(19-17-23)26-13-9-10-14-27(26)30-32-34-35-33-30/h6-14,16-19,22,29H,4-5,15,20-21H2,1-3H3,(H,32,33,34,35)/t29-/m0/s1	InChI=1S/C31H35N5O3/c1-4-5-15-28(37)36(29(22(2)3)31(38)39-21-24-11-7-6-8-12-24)20-23-16-18-25(19-17-23)26-13-9-10-14-27(26)30-32-34-35-33-30/h6-14,16-19,22,29H,4-5,15,20-21H2,1-3H3,(H,32,33,34,35)/t29-/m0/s1	TRUE	TRUE	C(N([C@H](C(OCC1=CC=CC=C1)=O)[C@@H](C)C)C(CCCC)=O)C2=CC=C(C3=C(C=CC=C3)C=4NN=NN4)C=C2	InChI=1S/C31H35N5O3/c1-4-5-15-28(37)36(29(22(2)3)31(38)39-21-24-11-7-6-8-12-24)20-23-16-18-25(19-17-23)26-13-9-10-14-27(26)30-32-34-35-33-30/h6-14,16-19,22,29H,4-5,15,20-21H2,1-3H3,(H,32,33,34,35)/t29-/m0/s1	TRUE
3729	100.102.682	DBEG						428-440-2	471863-88-4	yes	organic	mono-constituent substance	NONS	Tonnage data confidential			[H][C@@]12CO[C@@H](C)O[C@@]1([H])[C@H](OCC1=CC=CC=C1)[C@@H](OCC1=CC=CC=C1)C(O)O2						C[C@@H]1OC[C@@H]2[C@@H](O1)[C@@H]([C@H](C(O2)O)OCC3=CC=CC=C3)OCC4=CC=CC=C4	FALSE		InChI=1S/C22H26O6/c1-15-24-14-18-19(27-15)20(25-12-16-8-4-2-5-9-16)21(22(23)28-18)26-13-17-10-6-3-7-11-17/h2-11,15,18-23H,12-14H2,1H3/t15-,18-,19-,20+,21-,22?/m1/s1		InChI=1S/C22H26O6/c1-15-24-14-18-19(27-15)20(25-12-16-8-4-2-5-9-16)21(22(23)28-18)26-13-17-10-6-3-7-11-17/h2-11,15,18-23H,12-14H2,1H3/t15-,18-,19-,20+,21-,22?/m1/s1		TRUE
3734	100.102.684	PHOTOSOL 7-265						428-460-1		Omitted undefined stereo in OpenBabel	organic	mono-constituent substance	NONS	Tonnage data confidential			CCCCC1(O)C2=C(C=CC(OC)=C2)C2=C3C=CC(OC)=CC3=C3OC(C=CC3=C12)(C1=CC=C(OC)C=C1)C1=CC=C(OC)C=C1						CCCCC1(C2=C(C=CC(=C2)OC)C3=C1C4=C(C5=C3C=CC(=C5)OC)OC(C=C4)(C6=CC=C(C=C6)OC)C7=CC=C(C=C7)OC)O	FALSE		InChI=1S/C40H38O6/c1-6-7-21-39(41)35-24-30(45-5)17-19-32(35)36-31-18-16-29(44-4)23-34(31)38-33(37(36)39)20-22-40(46-38,25-8-12-27(42-2)13-9-25)26-10-14-28(43-3)15-11-26/h8-20,22-24,41H,6-7,21H2,1-5H3		InChI=1S/C40H38O6/c1-6-7-21-39(41)35-24-30(45-5)17-19-32(35)36-31-18-16-29(44-4)23-34(31)38-33(37(36)39)20-22-40(46-38,25-8-12-27(42-2)13-9-25)26-10-14-28(43-3)15-11-26/h8-20,22-24,41H,6-7,21H2,1-5H3		TRUE
3731	100.102.685	CMTD						428-470-6	5728-16-5	yes	organic	mono-constituent substance	NONS	Tonnage data confidential			COC1=NSN=C1Cl			DTXCID90543350	COC1=NSN=C1Cl	TRUE	COC1=NSN=C1Cl	TRUE		InChI=1S/C3H3ClN2OS/c1-7-3-2(4)5-8-6-3/h1H3	InChI=1S/C3H3ClN2OS/c1-7-3-2(4)5-8-6-3/h1H3	InChI=1S/C3H3ClN2OS/c1-7-3-2(4)5-8-6-3/h1H3	TRUE	TRUE
3742	100.102.687	UK-356,729						428-490-5	215299-75-5	yes	organic	mono-constituent substance	NONS	Tonnage data confidential			CCC1=C(N)C(=NN1CC1=CC=CC=N1)C(N)=O						CCC1=C(C(=NN1CC2=CC=CC=N2)C(=O)N)N	FALSE		InChI=1S/C12H15N5O/c1-2-9-10(13)11(12(14)18)16-17(9)7-8-5-3-4-6-15-8/h3-6H,2,7,13H2,1H3,(H2,14,18)		InChI=1S/C12H15N5O/c1-2-9-10(13)11(12(14)18)16-17(9)7-8-5-3-4-6-15-8/h3-6H,2,7,13H2,1H3,(H2,14,18)		TRUE
3749	100.102.692	1,3-dioxo-2,3-dihydro-1H-benzo[5,10]anthra[2,1,9-def]isoquinoline-8-sulfonic acid						428-540-6	152165-12-3	yes	organic	mono-constituent substance	NONS	Tonnage data confidential			OS(=O)(=O)C1=C2C=CC=C3C4=CC=C5C(=O)NC(=O)C6=C5C4=C(C=C6)C(C=C1)=C23				OS(=O)(=O)C1=CC=C2C3=CC=C4C(=O)NC(=O)C5=C4C3=C(C=C5)C3=C2C1=CC=C3	OK	C1=CC2=C3C(=C1)C(=CC=C3C4=CC=C5C6=C(C=CC2=C46)C(=O)NC5=O)S(=O)(=O)O	OK		InChI=1S/C22H11NO5S/c24-21-15-6-4-12-10-2-1-3-14-17(29(26,27)28)9-8-11(18(10)14)13-5-7-16(22(25)23-21)20(15)19(12)13/h1-9H,(H,23,24,25)(H,26,27,28)	InChI=1S/C22H11NO5S/c24-21-15-6-4-12-10-2-1-3-14-17(29(26,27)28)9-8-11(18(10)14)13-5-7-16(22(25)23-21)20(15)19(12)13/h1-9H,(H,23,24,25)(H,26,27,28)	InChI=1S/C22H11NO5S/c24-21-15-6-4-12-10-2-1-3-14-17(29(26,27)28)9-8-11(18(10)14)13-5-7-16(22(25)23-21)20(15)19(12)13/h1-9H,(H,23,24,25)(H,26,27,28)	TRUE	TRUE
3754	100.102.694	AGK 4172						428-560-5	96124-76-4	Omitted undefined stereo in OpenBabel	organic	mono-constituent substance	NONS	Tonnage data confidential			CCC(OC1=C(C=C(C=C1)C(C)(C)CC)C(C)(C)CC)C(=O)NC1=CC(=CC=C1)C(=O)NC1=NN(C(=O)C1N1C=CC=N1)C1=C(Cl)C=C(Cl)C=C1Cl						CCC(C(=O)NC1=CC=CC(=C1)C(=O)NC2=NN(C(=O)C2N3C=CC=N3)C4=C(C=C(C=C4Cl)Cl)Cl)OC5=C(C=C(C=C5)C(C)(C)CC)C(C)(C)CC	FALSE		InChI=1S/C39H43Cl3N6O4/c1-8-30(52-31-16-15-24(38(4,5)9-2)20-27(31)39(6,7)10-3)36(50)44-26-14-11-13-23(19-26)35(49)45-34-33(47-18-12-17-43-47)37(51)48(46-34)32-28(41)21-25(40)22-29(32)42/h11-22,30,33H,8-10H2,1-7H3,(H,44,50)(H,45,46,49)		InChI=1S/C39H43Cl3N6O4/c1-8-30(52-31-16-15-24(38(4,5)9-2)20-27(31)39(6,7)10-3)36(50)44-26-14-11-13-23(19-26)35(49)45-34-33(47-18-12-17-43-47)37(51)48(46-34)32-28(41)21-25(40)22-29(32)42/h11-22,30,33H,8-10H2,1-7H3,(H,44,50)(H,45,46,49)		TRUE
8919	100.102.696	Poly[(tricyclo[5.2.1.0(2,6)]decane-3,5-diylethylene)-co-(bicyclo[3.3.0]octane-2,4-diylethylene)-co-(tricyclo[6.4.0.0(2,6)]dodecane-3,5-diethylene)]						428-580-4		polymer	organic	mono-constituent substance	NONS	Tonnage data confidential			[Xe]CCC1CC(CCC2CC(CCC3CC([Xe])C4C5CCC(C5)C34)C3CCCC23)C2CC3CCCCC3C12								probably a polymer
8918	100.102.697	ZEON-MTF(P)						428-590-9		polymer	organic	mono-constituent substance	NONS	Tonnage data confidential	polymer		[Xe]CC1CC(C[Xe])C2C1CC1CCCCC21								probably a polymer
3772	100.102.699	MIF 800						428-610-6		missing cis/trans infomation	organic	mono-constituent substance	NONS	Tonnage data confidential			FC(F)(F)C(F)(F)C(F)(F)C(F)(F)C(F)(F)C(F)(F)C(F)(F)C(F)(F)CC[Si](N=C=O)(N=C=O)N=C=O						C(C[Si](N=C=O)(N=C=O)N=C=O)C(C(C(C(C(C(C(C(F)(F)F)(F)F)(F)F)(F)F)(F)F)(F)F)(F)F)(F)F	FALSE		InChI=1S/C13H4F17N3O3Si/c14-6(15,1-2-37(31-3-34,32-4-35)33-5-36)7(16,17)8(18,19)9(20,21)10(22,23)11(24,25)12(26,27)13(28,29)30/h1-2H2		InChI=1S/C13H4F17N3O3Si/c14-6(15,1-2-37(31-3-34,32-4-35)33-5-36)7(16,17)8(18,19)9(20,21)10(22,23)11(24,25)12(26,27)13(28,29)30/h1-2H2		TRUE
8937	100.102.704	NCMC-NCA						428-660-9		yes	organic	mono-constituent substance	NONS	Tonnage data confidential			CCOC(=O)CN1[C@H](C2CCCCC2)C(=O)OC1=O						CCOC(=O)CN1[C@@H](C(=O)OC1=O)C2CCCCC2	FALSE		InChI=1S/C13H19NO5/c1-2-18-10(15)8-14-11(12(16)19-13(14)17)9-6-4-3-5-7-9/h9,11H,2-8H2,1H3/t11-/m1/s1		InChI=1S/C13H19NO5/c1-2-18-10(15)8-14-11(12(16)19-13(14)17)9-6-4-3-5-7-9/h9,11H,2-8H2,1H3/t11-/m1/s1		TRUE
9214	100.102.712	UK-294,312						428-740-3		yes	organic	mono-constituent substance	NONS	Tonnage data confidential			COC1=C(OC)C(C2=CC=C(F)C=C2)=C(C#N)C(N)=C1						COC1=C(C(=C(C(=C1)N)C#N)C2=CC=C(C=C2)F)OC	FALSE		InChI=1S/C15H13FN2O2/c1-19-13-7-12(18)11(8-17)14(15(13)20-2)9-3-5-10(16)6-4-9/h3-7H,18H2,1-2H3		InChI=1S/C15H13FN2O2/c1-19-13-7-12(18)11(8-17)14(15(13)20-2)9-3-5-10(16)6-4-9/h3-7H,18H2,1-2H3		TRUE
4164	100.102.714	BIS A BIS AZIDE						428-770-7	71550-57-7	yes	organic	mono-constituent substance	NONS	Tonnage data confidential			CC(C)(C1=CC=C(OC2=CC=C(C=C2)N=[N+]=[N-])C=C1)C1=CC=C(OC2=CC=C(C=C2)N=[N+]=[N-])C=C1			DTXCID301027204	CC(C)(C1=CC=C(OC2=CC=C(C=C2)N=[N+]=[N-])C=C1)C1=CC=C(OC2=CC=C(C=C2)N=[N+]=[N-])C=C1	TRUE	CC(C)(C1=CC=C(C=C1)OC2=CC=C(C=C2)N=[N+]=[N-])C3=CC=C(C=C3)OC4=CC=C(C=C4)N=[N+]=[N-]	FALSE		InChI=1S/C27H22N6O2/c1-27(2,19-3-11-23(12-4-19)34-25-15-7-21(8-16-25)30-32-28)20-5-13-24(14-6-20)35-26-17-9-22(10-18-26)31-33-29/h3-18H,1-2H3	InChI=1S/C27H22N6O2/c1-27(2,19-3-11-23(12-4-19)34-25-15-7-21(8-16-25)30-32-28)20-5-13-24(14-6-20)35-26-17-9-22(10-18-26)31-33-29/h3-18H,1-2H3	InChI=1S/C27H22N6O2/c1-27(2,19-3-11-23(12-4-19)34-25-15-7-21(8-16-25)30-32-28)20-5-13-24(14-6-20)35-26-17-9-22(10-18-26)31-33-29/h3-18H,1-2H3	TRUE	TRUE	C(C)(C)(C1=CC=C(OC2=CC=C(N=[N+]=[N-])C=C2)C=C1)C3=CC=C(OC4=CC=C(N=[N+]=[N-])C=C4)C=C3	InChI=1S/C27H22N6O2/c1-27(2,19-3-11-23(12-4-19)34-25-15-7-21(8-16-25)30-32-28)20-5-13-24(14-6-20)35-26-17-9-22(10-18-26)31-33-29/h3-18H,1-2H3	TRUE
9216	100.102.715	179U60						428-780-1	20535-83-5	yes	organic	mono-constituent substance	NONS	Tonnage data confidential			COC1=C2NC=NC2=NC(N)=N1			DTXCID8029365	COC1=NC(N)=NC2=C1NC=N2	FALSE	COC1=NC(=NC2=C1NC=N2)N	FALSE		InChI=1S/C6H7N5O/c1-12-5-3-4(9-2-8-3)10-6(7)11-5/h2H,1H3,(H3,7,8,9,10,11)	InChI=1S/C6H7N5O/c1-12-5-3-4(9-2-8-3)10-6(7)11-5/h2H,1H3,(H3,7,8,9,10,11)	InChI=1S/C6H7N5O/c1-12-5-3-4(9-2-8-3)10-6(7)11-5/h2H,1H3,(H3,7,8,9,10,11)	TRUE	TRUE	O(C)C1=C2C(=NC(N)=N1)N=CN2	InChI=1S/C6H7N5O/c1-12-5-3-4(9-2-8-3)10-6(7)11-5/h2H,1H3,(H3,7,8,9,10,11)	TRUE
4208	100.102.719	2P45AZ						428-820-8	87927-77-3	yes	organic	mono-constituent substance	NONS	Tonnage data confidential			CC1=C(CC2=CC=CC=C2)NC(=N1)C1=CC=CC=C1			DTXCID90514323	CC1=C(CC2=CC=CC=C2)N=C(N1)C1=CC=CC=C1	FALSE	CC1=C(N=C(N1)C2=CC=CC=C2)CC3=CC=CC=C3	FALSE		InChI=1S/C17H16N2/c1-13-16(12-14-8-4-2-5-9-14)19-17(18-13)15-10-6-3-7-11-15/h2-11H,12H2,1H3,(H,18,19)	InChI=1S/C17H16N2/c1-13-16(12-14-8-4-2-5-9-14)19-17(18-13)15-10-6-3-7-11-15/h2-11H,12H2,1H3,(H,18,19)	InChI=1S/C17H16N2/c1-13-16(12-14-8-4-2-5-9-14)19-17(18-13)15-10-6-3-7-11-15/h2-11H,12H2,1H3,(H,18,19)	TRUE	TRUE
4205	100.102.720	MOC-VAL-PRO 8321						428-830-2	181827-47-4	yes	organic	mono-constituent substance	NONS	Tonnage data confidential			COC(=O)N[C@@H](C(C)C)C(=O)N1CCC[C@H]1C(O)=O						CC(C)[C@@H](C(=O)N1CCC[C@H]1C(=O)O)NC(=O)OC	FALSE		InChI=1S/C12H20N2O5/c1-7(2)9(13-12(18)19-3)10(15)14-6-4-5-8(14)11(16)17/h7-9H,4-6H2,1-3H3,(H,13,18)(H,16,17)/t8-,9-/m0/s1		InChI=1S/C12H20N2O5/c1-7(2)9(13-12(18)19-3)10(15)14-6-4-5-8(14)11(16)17/h7-9H,4-6H2,1-3H3,(H,13,18)(H,16,17)/t8-,9-/m0/s1		TRUE
[truncated: 5,641 more rows]

## Sheet: Organic_severalComponents
Factsheet_ID	Substance_ID	Substance_Name	Name_To_Structure SMILES	Name_To_Structure InChI	Name identical to CAS RN?	Name identical to SMILES in ECHA DB?	Comment for name	EC_No	CAS_RN	Entry in ECHA DB consistent?	Substance Type manually	Composition manually	Registration_Type	Tonnage_Band_Displayed	SMILES corresponding to CAS RN	InChI corresponding to CAS RN	SMILES ECHA database	SMILES ECHA database from WebPage	Old entry from ECHA database correct?	DTXCID	SMILES CompTox	SMILES identical	SMILES PubChem	SMILES identical2	Comment	INCHI ECHA database	INCHI CompTox	INCHI Pubchem	INCHI identical 1	INCHI identical 2	SMILES SciFinder	INCHI SciFinder	INCHI identical 3
[truncated: 2,448 more rows]
